# Supplementary Information

## The genetic structure of the world's first farmers

|                                                                                            |         |
|--------------------------------------------------------------------------------------------|---------|
| <b>Table of Contents</b>                                                                   | 1       |
| <b>SI 1</b> – Description of ancient samples and archaeological context                    | 2-11    |
| <b>SI 2</b> – Human Origins dataset                                                        | 12-13   |
| <b>SI 3</b> – Population groupings in the ancient Near East                                | 14-16   |
| <b>SI 4</b> – Pervasive Basal Eurasian ancestry in the ancient Near East                   | 17-44   |
| <b>SI 5</b> – Ancient Near Easterners had less Neanderthal ancestry than ancient Europeans | 45-50   |
| <b>SI 6</b> – Y-chromosome haplogroup variation in the ancient Near East                   | 51-58   |
| <b>SI 7</b> – Admixture history of ancient West Eurasians                                  | 59-112  |
| <b>SI 8</b> – Population admixture into Eastern Africans from the Levantine Neolithic      | 113-120 |
| <b>SI 9</b> – Constraints on the origins of Ancestral North Indians                        | 121-128 |
| <b>SI 10</b> – Modeling admixture from ghost Populations                                   | 129-138 |
| <b>SI 11</b> – Admixture in East Asians and Eastern European hunter-gatherers              | 139-152 |

# Supplementary Information 1

## Description of ancient samples and archaeological context

This note presents information on the archaeological context of 45 individuals from the ancient Near East for whom we report genome-wide data in this study. We give uncalibrated dates in radiocarbon years (“bp”). We give calibrated dates in years before the common era, converting from uncalibrated to calibrated dates using IntCal13<sup>1</sup> and OxCal4.2<sup>2</sup> (<https://c14.arch.ox.ac.uk/oxcal/OxCal.html>). We indicate dates obtained directly on the skeleton for which we obtained ancient DNA by the suffix “calBCE”. We indicate indirect dates obtained based on archaeological context as “BCE”.

### Iran

#### **Hotu Cave (Iran)**

Hotu Cave is located in the foothills of the Alborz Mountains, near the modern town of Behshahr on the southern shore of the Caspian Sea in northern Iran. The site was excavated to a depth of 12 meters by the American physical anthropologist Carleton Coon in the spring of 1951, and provides evidence of human occupation at various times from the early Mesolithic to the post-Achaemenid periods<sup>3-5</sup>. Skeletal remains of three sets of individuals (I, II, III) were recovered from Pleistocene Gravel 4 of Trench D, the deepest sounding undertaken (Section 2)<sup>3</sup>. In Coon’s preliminary excavation report, this gravel was initially identified as an aceramic Neolithic level, but was subsequently reclassified as a Mesolithic horizon.<sup>1,2,3</sup> In 1955, two charcoal samples recovered in association with the skeletal remains from depths of 9.5 and 10.15 meters yielded uncalibrated radiocarbon ages of 9190±590 bp and 9270±570 bp respectively<sup>6</sup>. In 2013, AMS analyses of collagen extracted from a tooth from Mesolithic skeleton I yielded an uncalibrated radiocarbon age of 9480±40 bp (9119-8637 calBCE)<sup>7</sup>. The set III of individuals includes one adult partially complete skeleton (HotuIIIa) and the remains of a young child estimated to be 1.5-2 years old (HotuIIIb). We sampled the right petrous bone of HotuIIIb for DNA analysis.

Subsequent AMS analysis of this specimen yielded an uncalibrated radiocarbon age of 7250 ± 40 bp (6218-6034 calBCE). The discrepancy in the direct dates of skeletal remains (Hotu I and IIIb) recovered from such close proximity to one another in the same archaeological horizon causes us to doubt the age of the Hotu IIIb specimen. There are no stratigraphic unconformities indicating that this specimen may have been introduced from overlying Neolithic cave deposits, and we suspect that the later than anticipated date may result from the use of modern-day organic materials such as the shellac or glue in post-excavation reconstruction of the Hotu IIIb crania. Genetic similarities between the CHG and Hotu IIIb specimens demonstrate that there are continuities between Iranian Neolithic

populations and local hunter-gatherer groups in northern Iran and the Caucasus, rather than with Epipalaeolithic or Neolithic populations originating in Anatolia or the Levant. The earlier date (9119-8637 BCE)<sup>8</sup> obtained from the Hotu I skeleton is not essential to support this observation, as the continuity of Iran Neolithic with hunter-gatherers of the southern Caucasus/Iran highlands rather than with those of the Levant is evident when either the HotuIIIb specimen or the securely dated pre-Neolithic Caucasus hunter-gatherers<sup>8</sup> from Georgia are used (main text). We show a conservatively wide range that includes both the earliest date from Hotu I and the later direct date from HotuIIIb in Fig. 1a, although based on the arguments made here we strongly favor the earlier date and Mesolithic attribution of the HotuIIIb individual.

- HotuIIIb (I1293): 1.5-2 year old individual.

### **Ganj Dareh (Iran)**

Tepe Ganj Dareh is a mound on the floor of the Gamas-Ab Valley, and is situated at an altitude of ~1,400 meters in the High Zagros region of Kermanshah Province in western Iran. It is one of several mounds discovered during survey work in the area<sup>9</sup>. It measures about 40 meters in diameter and 7 to 8 meters in height and has five identified levels (A to E), with the lowest level E being the oldest. Permanent architecture is seen earliest at level D. Philip E. L. Smith led an excavation of roughly 20% of the mound in four seasons between 1967 and 1974. Zooarchaeological and archaeobotanical evidence show a population exploiting ovicaprids, with goats dominant, as well as evidence for use of wild barley but no plant domesticates. There is evidence of herding but no evidence for decreased size or changes in horn core morphology<sup>10,11</sup>. Current evidence places the occupation of the site at approximately 8000-7700 calBCE<sup>11</sup>. None of the human remains have been directly dated. The human remains are highly fragmentary. The current minimum number of individual is 116, of which 56 are catalogued as skeletons each represented by more than 4 elements<sup>12</sup>. The following six Ganj Dareh individuals (all petrous bone samples) are included in this study. None has a direct radiocarbon date:

- GD13A (I1290): 30-50 year-old male from level C.
- GD14B (I1944): 3-4 year-old child from level B1.
- GD16 (I1945): 5.5-7.5 year-old child from level D.
- GD37 (I1949): 30-50 year-old male from levels D/E.
- GD39 (I1951): 1.5-2.5 year-old child from level D crypt.
- GD1150 (I1955): 18-30 year-old male from levels A/D. This individual is a clear genetic outlier and was analyzed separately from the other individuals pending radiocarbon dating, which confirmed that it was not from the Neolithic period but of recent origin (1430-1485 calCE (330±30 BP, Beta-432801); it is thus labeled Iran\_recent.

### **Seh Gabi (Iran)**

The site of Seh Gabi is a series of seven small mounds, identified as A through G, on a branch of the Gamas Ab River in the Kangavar Valley of the High Zagros region of Kermanshah Province, western Iran, about 6 kilometers from the much larger Chalcolithic and Bronze Age site of Godin Tepe. The mounds were scattered over an area of ~15 hectares with four excavated by Louis D. Levine and the Royal Ontario Museum between 1971 and 1973. Occupation lasted from the Late Neolithic through the Chalcolithic periods<sup>13</sup>. The human material, recovered in 1971 and 1973, comprises a minimum of 31 individuals that are almost entirely subadults: fetuses, infants and children <4 years of age; many with evidence of pathology. We report ancient DNA data on six samples (all petrous bones) from Mound A (n=2), Mound B (n=3), and Mound C (n=1). No radiocarbon dates have been obtained on Mound A, and so we use archaeological dates for the Chalcolithic of 4500-3500 BCE. Radiocarbon dates have been obtained from Mound B although not on the skeletons for which we report DNA. The dates obtained range from 5630±80 bp (SI-4915) to 5020±70 bp (SI-4910), and hence we represent the dates for samples from this mound by the union of the 95.4% calibrated confidence intervals (4680-3662 calBCEP<sup>14,15</sup>). We directly dated the Mound C individual who is Late Neolithic:

- SG19 (I1665): fetal remains, ~26 weeks old from Mound A.
- SG21 (I1674): fetal remains, ~35 weeks old from Mound A.
- SG7 (I1662): fetal remains, ~34 weeks old from Mound B.
- SG11 (I1670): ~6 month-old infant from Mound B.
- SG16 (I1661): ~9 months old infant from Mound B.
- SG2 (I1671): 5837-5659 calBCE (OxA-33168, 6850±40 bp). ~6 month-old infant from Mound C.

### **Levant**

#### **Raqefet Cave (Israel)**

Raqefet Cave is located within a southern extension of Mt. Carmel. It has a long prehistoric sequence spanning the Middle Palaeolithic through to the Neolithic periods<sup>16</sup>. The first excavation was led by Noy and Higgs (1970-1972), and the most recent excavation was led by Nadel and Lengyel (2004-2011). The first chamber was used extensively by the Natufians, who left on the terrace 100 bedrock mortars, cupmarks and cupules<sup>17</sup>. Some of the mortars are among the largest ever recorded for Natufian sites<sup>18</sup>, and one of the deepest has a grid-like pattern incised inside the shaft<sup>19</sup>. The samples we analyze for ancient DNA (all of which are petrous bones) were found in single or double primary burials lying on their back or on their side in flexed positions. These are part of a cluster of Natufian graves created within a short time span in a dedicated area of the first chamber of the cave. The area

contains approximately 30 human skeletons, all but one of which are in an area of about 15 meters squared. Faunal analysis indicates feasting by the open graves and the burial of food remains within the graves<sup>20</sup>. Phytolith analysis indicates the use of plant materials in the graves and in the mortars<sup>21</sup>. In four graves, the pit was lined with greens and flowers prior to inhumation, as reflected by dozens of plant impressions in each<sup>22</sup>. Three skeletons in the series have direct dates, and one also produced ancient DNA data. The dated skeletons are: Homo19 at 11840-11340 calBCE (RTK-6480 11725±125 bp), Homo28 at 10600-9760 calBCE (RTK-6638, 10320±115 bp), and Homo18 (Nat13) at 11520-11110 calBCE (RTK-6607, 11405±120 bp). We use the union of the 95.4% confidence intervals for the three direct dates (11840-9760 BCE), to represent the five individuals without direct dates:

- Nat4/Homo14 (I1685): young adult, <30 years old at death.
- Nat5/Homo13 (I1069): pre-adolescent, 9-12 years old at death.
- Nat6/Homo10 (I1690): pre-adolescent, 9-12 years old at death.
- Nat9/Homo16 (I1072): young child, 2-3 years old at death.
- Nat10/Homo17 (I0861): young adult, <30 years old at death.
- Nat13/Homo18 (I1687): 11520-11110 calBCE (RTK-6607, 11405±120 bp). >30 years old at death.

#### **Motza (Israel)**

The site of Motza Tachtit is situated west of the main entrance to Jerusalem. It was uncovered during salvage excavations in the year 2012, and lies 900 meters south-east of the distinct archaeological site of Tel Motza. The excavations revealed a burial of an adult male buried in a flexed position with a fox mandible placed intentionally under its head (E. Vered, personal information). The skeleton (Locus 713) is dated to the end of the PPNB period, 7300-6750 BCE, based on its Level II context where other burials were also found<sup>23</sup>.

- Motz1 (I0867): adult male (confirmed genetically).

#### **‘Ain Ghazal (Jordan)**

‘Ain Ghazal is one of the largest (approximately 14 hectare) Neolithic sites known in the Near East, and was continuously occupied from around 8300-5000 BCE, followed by sporadic occupation in the Chalcolithic and Byzantine periods<sup>24-26</sup>. The petrous bone samples of a total of 15 individuals gave ancient DNA data. Three of the early Middle PPNB skulls at ‘Ain Ghazal were found in a cache with a range of ages (11, 20s, and >60), and all were at one time plastered. Another early Middle PPNB sample that provided DNA included painted and burnt cranial fragments, and was probably also plastered. The three Early Bronze Age samples analyzed in this study were found in a cave high

above the East Field of 'Ain Ghazal and are probably associated with an Early Bronze Age village about 450 meters south of the Neolithic town.

- AG\_83\_3082 (I1727): early MPPNB.
- AG83/1 (I1416): early MPPNB.
- AG84/1 (I1414): early MPPNB.
- AG83\_3 (I1701): early MPPNB.
- AG84\_8 (I1709): early MPPNB.
- AG88\_1 (I1700): early MPPNB.
- AG83\_6 (I1710): middle MPPNB.
- AG84/2 (I1415): late MPPNB.
- AG83\_5 (I1707): late MPPNB.
- AG89\_1 (I1704): early LPPNB.
- AG037C (I1679): early PPNC.
- AG84\_5 (I1699): middle PPNC.
- AG98\_1 (I1705): Early Bronze Age.
- AG98\_2 (I1706): Early Bronze Age.
- AG\_84\_3083\_116 (I1730): 2489-2299 calBCE (OxA-32775, 3925±31 bp). Early Bronze Age.

For the individuals for whom we do not have direct radiocarbon dates, we give dates based on stratigraphic layers. The ages of these layers were determined based on dates of non-human archaeological samples (fauna, charcoal, seeds, etc.), results in the following calibrated date ranges:

8300-7900 BCE: early MPPNB (early Middle PPNB)

7900-7700 BCE: middle MPPNB (middle Middle PPNB)

7700-7500 BCE: late MPPNB (late Middle PPNB)

7500-7300 BCE: early LPPNB (early Late PPNB)

6900-6800 BCE: early PPNC

6800-6700 BCE: middle PPNC

2490-2300 BCE: Early Bronze Age (range based on dated individual AG\_84\_3083\_116)

## **Anatolia**

### **Barcın Höyük (Turkey)**

Barcın Höyük is located in the Yenişehir Plain in Northwest Anatolia (Turkey). Excavations have demonstrated continuous occupation from around 6600-6000 BCE, producing about 4.5 meters of

stratified Neolithic settlement deposits<sup>27</sup>. Late Chalcolithic deposits have been excavated at the centre of the mound, and these revealed fragmentary remains of two mud-brick houses, several large ovens, and a ditch that surrounded (part of) the settlement.<sup>28</sup> Two infant jar burials were found among the settlement remains. The burial of an adult male in flexed position in a simple pit is also thought to belong to the Late Chalcolithic<sup>29</sup>. The sample analyzed here is obtained from a petrous bone of a 12±4 month old infant<sup>30</sup> that was excavated in 2009 in Late Chalcolithic deposits of Trench M10, where it had been buried in a tall Hole Mouth jar. Although they were crushed, the cranial parts as well as the postcranial bones were almost complete. No pathology was observed.

- M10-111 (I1584): 3943-3708 calBCE (OxA-32776, 5016±31 bp). Chalcolithic.

## **Armenia**

### **Areni-1 (Vayots-Dzor Province, Republic of Armenia)**

Areni-1 (also known as Birds' Cave) is a three-chambered cave located on the left-hand side of the Arpa River basin, a tributary of the River Araxes, within the eastern portion of the modern village of Areni in the Vayots Dzor Province of southern Armenia. Excavations at the site began in 2007 and were directed by Boris Gasparyan (Institute of Archaeology and Ethnography, National Academy of Sciences, Armenia) and co-directed by Ron Pinhasi (School of Archaeology, University College Dublin, Ireland) and Gregory Areshian (Cotsen Institute of Archaeology at UCLA, USA). The significance of the site became clear during the initial excavations when very well preserved Chalcolithic (4300–3400 BCE) and Medieval (4<sup>th</sup>–18<sup>th</sup> centuries CE) occupations were exposed<sup>31,32</sup>. Owing to the cave's dry condition, the perishable organic materials are exceptionally well preserved. As a result, stratigraphic observations and a set of secure radiocarbon dates allow the reconstruction of the Late Chalcolithic sequence of Armenia (and the broader region) between 4300-3400 BCE with unparalleled precision. During this period, the cave was used for habitation, for keeping animals and storing plants, for the production of wine, and for ritual purposes. The data from the cave demonstrates evidence for early social complexity, and connections to contemporary Near Eastern and North Caucasian societies. Areni-1 yielded the world's earliest evidence of footwear<sup>33</sup>, wine making<sup>28</sup>, and a wealth of exceptionally well preserved organic material including seeds, wooden artefacts, reed mats, baskets, textiles and desiccated fruits. It also yielded secondary burials of subadult crania, each deposited in a clay pot<sup>31,32</sup>. The petrous bones of three subadult crania (jar burials) from the Early Late Chalcolithic (Horizon III) gave ancient DNA and are directly dated. In addition, two remains from the Middle Late Chalcolithic (Horizon II) gave DNA (the only samples in the study not from petrous bones). For these two, we use a date of 4350-3700 BCE based on context.

- AR1/43c (I1631): 4250-4050 calBCE (OxA-19332, 5323±30 bp). Early Late Chalcolithic (Horizon III), Burial 1, age 8±2 years.
- AR1/44 (I1634): 4330-4060 calBCE (OxA-19331, 5366±31 bp). Early Late Chalcolithic (Horizon III), Burial 2, age 11±2.5 years.
- AR1/46 (I1632): 4230-4000 calBCE (OxA-18599, 5285±29 bp). Early Late Chalcolithic (Horizon III), Burial 3, age 15±2.5 years.
- ARE20 (I1409): Middle Late Chalcolithic (Horizon II), Trench 1, Unit 4, Square E19, Locus 81, Spit 6 - tooth sampled.
- ARE12 (I1407): Middle Late Chalcolithic (Horizon II), Trench 2A, Unit 7, Square S33/T33, Locus 9, Spit 23 - right second metatarsal sampled.

### **Talin necropolis (Aragatsotn Province, Republic of Armenia)**

The necropolis is located at the limits of the city of Talin, and is distributed on both sides of the Talin-Gyumri Highway. The Early Iron Age remains are found in the northwestern part of the necropolis (north-western limits of Talin), in a cemetery occupying about 3 kilometers squared<sup>2</sup>. The Early Bronze Age and Late Bronze Age cemeteries occupy around one kilometer squared<sup>2</sup>. Systematic archaeological excavations at the site have been conducted since 1984, and over one hundred tombs dating from the last quarter of the 4<sup>th</sup> millennium BC through Hellenistic period have been excavated. The Early Bronze Age is represented by a ritualistic enclosure and four tombs. These are dated to the first phase of the Kura-Araxes culture, which overspread the region in the second half of the fourth millennium BCE to the early part of the third millennium BCE. The tombs are earth and stone tumuli, 0.4-0.6 meters high, but differ in their construction, with some having been built within pits, and others at ground level. Burial 115 was excavated as part of a group of 12 tombs in 2014, during rescue archaeology prior to road construction during the North-South Corridor Highway project<sup>34,35</sup>.

- TA3/R8 (I1658): 3347-3092 calBCE (OxA-31874, 4492±29 bp). Early Bronze Age I, Burial 115, petrous bone from skull N1.

### **Kalavan-1 burial ground (Gegharkunik Province, Republic of Armenia)**

Kalavan-1 is an open-air site 1,640 meters above sea level on the southwest slopes of the Aregunyats Range north of Lake Sevan, Northeast Armenia. Archaeological and geological investigations were conducted here between 2005 and 2009 as part of a collaborative Armenian and French project. The excavation revealed two main levels of occupation dated to the Terminal Palaeolithic, overlain by an Early Bronze Age Kura-Araxes burial ground. The total excavated area approaches 70 meters squared. Five burial pits were uncovered, of which four, referred to as UF1, UF2, UF8 and UF9, contained single primary burials, while the fifth (UF5) is a multiple burial that held the remains of at



least three individuals. Six consistent radiocarbon dates on human skeletal material from UF5, UF8 and UF9 span 2900-2400 BCE, during the later part of the Kura-Araxes cultural horizon, and this is the range we use for the undated sample. Stone heaps rising to approximately 0.7m in height marked the graves of the adults. These structures were oval-shaped with a major axis of 1 meter, reaching 1.7 meters above the multiple burial. The position of the body in the pits varied: sitting, tightly flexed, and flexed. Post-sepulchral recovery of skulls and long bones occurred. The adult burials were furnished with the same assemblage of black burnished pottery that has the strongest association with the Kura basin ceramics and UF9 also contained bronze ornaments: a ring and a bracelet found near the skull. The child burial was in flexed position on its right side and was adorned with a neck ornament composed of dog molars and two stone beads, one of which was made of carnelian<sup>36,37</sup>. The two human remains (petrous bones) used in ancient DNA analyses came from the Early Bronze Age III period burials UF1 and UF9:

- KA1/14 (I1633): 2619-2410 BCE (Poz-22234, 3990±35 bp). Early Bronze Age III, Burial UF9.
- KA1/12 (I1635): Early Bronze Age III, Burial UF1.

#### **Katnaghbyur necropolis (Aragatsotn Province, Republic of Armenia)**

This site is located on the outskirts of Katnaghbyur village, 1-2 kilometers from the Yerevan-Talin Highway. Most of the archaeological materials are from rescue excavations of 10 tombs (1952, 1987-1988) that were typologically dated to the Early Iron Age. Tombs 2 and 3, as well as tomb 2 of the 1952 excavation, are dated to the 1100-800 BCE, while the other tombs are dated to the 900-700 BCE. The funerary chambers are cists with basalt slabs as walls, which are oriented west-east or north-south. Tomb 3 does not have a defined contour and resembles a pit grave in which the burial was encircled by slabs. Most of the tombs contained individual inhumations, either secondary (tombs 2 and 7) or primary, with the skeleton in a flexed position lying on its side (tomb 3). Tomb 8 is a double inhumation of a man and a woman. The sample we analyzed is Burial 1 or Kurgan N1 dating to the Middle Bronze Age / Late Bronze Age. It was excavated in 2014 as part of rescue archaeology efforts during the North-South Corridor Highway project<sup>38</sup>.

- KAT16 (I1656): 1501-1402 calBCE (OxA-31674, 3168±27 bp). Burial N1.

#### **References**

1. Reimer, P. J. *et al.* Intcal13 and Marine13 Radiocarbon Age Calibration Curves 0-50,000 Years cal BP. *Radiocarbon* **55**, 1869-1887, (2013).
2. Ramsey, C. B. & Lee, S. Recent and planned developments of the program OxCal. *Radiocarbon* **55**, 720-730, (2013).
3. Coon, C. S. Excavations at Hotu Cave, Iran, A Preliminary Report. *Proceedings of the American Philosophical Society* **96**, 231-249 (1952).

4. Coon, C. S. in *Catalogue des Hommes Fossiles V.* (eds H.V. Valois & H.L. Movius) 325-328 (1953).
5. Coon, C. S. *The Seven Caves.* (Alfred A. Knopf. New York, 1957).
6. Ralph, E. K. University of Pennsylvania Radiocarbon Dates I. *Science* **121**, 149-151, (1957).
7. Analytic, B. Report on Radiocarbon Analyses, Beta 344447, Hotu sample 532284 (2013).
8. Jones, E. R. *et al.* Upper Palaeolithic genomes reveal deep roots of modern Eurasians. *Nat. Commun.* **6**, 8912, (2015).
9. Young Jr, T. C. & Smith, P. E. L. Research in the Prehistory of Central Western Iran. *Science* **153**, 386-391, (1966).
10. Hesse, B. C. Slaughter patterns and domestication: the beginnings of pastoralism in Western Iran. *Man ns* **17**, 403-417, (1982).
11. Zeder, M. A. & Hesse, B. C. The initial domestication of goats (*Capra hircus*) in the Zagros Mountains 10,000 years ago. *Science* **287**, 2254-2257, (2000).
12. Merrett, D. C. *Bioarchaeology in Early Neolithic Iran: assessment of health status and subsistence strategy* (Unpublished Ph.D. thesis, University of Manitoba 2004).
13. Young, T. C. J. & Levine, L. D. R. *Excavations of the Godin Project: second progress report.*, (1974).
14. Henrickson, E. *Ceramic Styles and Cultural Interaction in the Early and Middle Chalcolithic of the Central Zagros, Iran* PhD. thesis, (1983).
15. Voigt, M. M. & Dyson, R. H. T. in *Chronologies in Old World Archaeology, 3rd edition, vols. 1+2* Vol. 2 (ed R.W. Ehrich) 122-178 (Chicago University Press, Chicago, 1992).
16. Lengyel, G., Bocquentin, F. & Nadel, D. in *Natufian Foragers in the Levant: Terminal Pleistocene Social Changes in Western Asia.* (eds O. Bar-Yosef & F. Valla) 478–504 (2013).
17. Nadel, D. & Lengyel, G. Human-made Bedrock Holes (mortars and cupmarks) as a Late Natufian social phenomenon. *Archaeology, Anthropology and Ethnology of Eurasia* **37**, 37–48, (2009).
18. Nadel, D., Filin, S., Rosenberg, D. & Miller, V. Prehistoric bedrock features: recent advances in 3D characterization and geometrical analyses. *Journal of Archaeological Science* **53**, 331-344, (2015).
19. Nadel, D. & Rosenberg, D. An incised pattern inside a Raqefet Cave bedrock mortar: New dimensions to Natufian stone carvings. *Journal of Lithic Studies* **In press**, (2016).
20. Yeshurun, R., Bar-Oz, G. & Nadel, D. The social role of food in the Natufian cemetery of Raqefet Cave, Mount Carmel, Israel. *Journal of Anthropological Archaeology* **32**, 511-526, (2013).
21. Power, R. C., Rosen, A. M. & Nadel, D. The economic and ritual utilization of plants at the Raqefet Cave Natufian site: The evidence from phytoliths. *Journal of Anthropological Archaeology* **33**, 49-65, (2014).
22. Nadel, D. *et al.* Earliest floral grave lining from 13,700–11,700-y-old Natufian burials at Raqefet Cave, Mt. Carmel, Israel. *Proceedings of the National Academy of Sciences* **110**, 11774-11778, (2013).
23. Mizrahi, S. Moza Tahtit. *Hadashot Arkheologiyot* **127**, [http://www.hadashot-esi.org.il/report\\_detail.aspx?id=24845&mag\\_id=24122](http://www.hadashot-esi.org.il/report_detail.aspx?id=24845&mag_id=24122), (2015).
24. Rollefson, G. & Kafafi, Z. in *Symbols at 'Ain Ghazal* (ed D. Schmandt-Besserat ) 3-29 (Berlin: ex oriente, 2013).

25. Bonogofsky, M. *n Osteo-Archaeological Examination of the Ancestor Cult during the Pre-Pottery Neolithic B Period in the Levant* PhD thesis, (2001).
26. Grindell, B. *Unmasked Equalities: An Examination of Mortuary Practices and Social Complexity in the Levantine Natufian and Pre-Pottery Neolithic*, (1998).
27. Gerritsen, F., Özbal, R. & Thissen, L. in *The Neolithic in Turkey. New Excavations and New Research. Vol. 5 Northwestern Turkey and Istanbul* (eds M. Özdoğan, N. Başgelen, & P. Kuniholm) 93-112 (Archaeology and Art Publications, 2013).
28. Gerritsen, F., Ozbal, R., Thissen, L., Ozbal, H. & Galik, A.-. The late Chalcolithic Settlements of barcin Hoyuk. *Anatolica* 36, p. 197-225. . *Anatolica* **36**, 197-225, (2010).
29. Roodenberg, J. J., As, A. V. & Alpaslan-Roodenberg, S. Barcin Hüyük in the Plain of Yenişehir (2005-2006). *Anatolica* **34**, 53-66, (2008).
30. Ubelaker, D. H. *Human skeletal remains: excavation, analysis, interpretation*. (Taraxacum Press, 1989).
31. Areshian, G. E. *et al.* The chalcolithic of the Near East and south-eastern Europe: discoveries and new perspectives from the cave complex Areni-1, Armenia. *Antiquity* **86**, 115-130, (2012).
32. Wilkinson, K. *et al.* The origins of the Bronze Age in the Caucasus: new discoveries at Birds' Cave, Vayots Dzor, Armenia. *Journal of Field Archaeology* **37**, 20-33, (2012).
33. Pinhasi, R. *et al.* First Direct Evidence of Chalcolithic Footwear from the Near Eastern Highlands. *PLoS ONE* **5**, e10984, (2010).
34. Kalantaryan, I. The Early Bronze Age complexes of Talin cemetery. , *Studii de Preistorie* **8**, 123-138, (2011).
35. Badalyan, R. S. & Avetisyan, P. S. in *Bronze and Iron Age Archaeological Sites in Armenia, I, Mt. Aragats and its Surrounding Region* (eds R. S. Badalyan & P.S. Avetisyan) 242-263 (BAR International Series 1697,, 2007).
36. Montoya, C. *et al.* The Upper Palaeolithic site of Kalavan 1 (Armenia): An Epigravettian settlement in the Lesser Caucasus. *Journal of Human Evolution* **65**, 621-640, (2013).
37. Chataigner, C. *et al.* in *Archaeology of Armenia in regional context* (eds P. Avetisyan & A. Bobokhyan) 37-43, 157=162 (: Gitutyun publishing house, 2012).
38. Badalyan, R. S. & Avetisyan, P. S. in *Bronze and Iron Age Archaeological Sites in Armenia, I, Mt. Aragats and its Surrounding Region* (eds R. S. Badalyan & P.S. Avetisyan) 152-155 (BAR International Series 1697,, 2007).

## Supplementary Information 2

### Human Origins dataset

For this study we genotyped 238 present-day individuals from West Eurasia on the Affymetrix Human Origins array<sup>1</sup>, which we added to the 2,345 individuals of the same dataset previously analyzed by Lazaridis et al.<sup>2</sup>. A total of 2,918 individuals on the Human Origins array have been published to date, including 1,025 by Patterson et al.<sup>1</sup>, 209 by Pickrell et al.<sup>3</sup>, 1,458 by Lazaridis et al.<sup>2</sup>, 178 by Qin and Stoneking<sup>4</sup>, and 48 by Skoglund et al.<sup>5</sup> Of the total 621,799 SNPs, we analyze a subset of 592,146 autosomal SNPs in the *HO* dataset which includes autosomal SNPs used in the 1240k capture<sup>6</sup>, intersected with the analysis set of 594,924 SNPs of ref.2.

The genotyped individuals are listed in Supplementary Data Table 2. Since our research permits for the collection of the samples analyzed in this dataset only cover studies of population prehistory, we have to stipulate some conditions before granting access to the data noted, as follows:

To access the dataset that includes individuals noted as “Letter” in the Access column of Supplementary Data Table 2, you need to send David Reich (reich@genetics.med.harvard.edu) a PDF of a signed letter containing the following language:

- (a) I will not distribute the data outside my collaboration,
- (b) I will not post the data publicly,
- (c) I will make no attempt to connect the genetic data to personal identifiers for the samples,
- (d) I will use the data only for studies of population history,
- (e) I will not use the data for commercial purposes

## References

1. Patterson, N. *et al.* Ancient admixture in human history. *Genetics* **192**, 1065-1093, (2012).
2. Lazaridis, I. *et al.* Ancient human genomes suggest three ancestral populations for present-day Europeans. *Nature* **513**, 409-413, (2014).
3. Pickrell, J. K. *et al.* The genetic prehistory of southern Africa. *Nat. Commun.* **3**, 1143, (2012).
4. Qin, P. & Stoneking, M. Denisovan Ancestry in East Eurasian and Native American Populations. *Molecular Biology and Evolution*, (2015).
5. Skoglund, P. *et al.* Genetic evidence for two founding populations of the Americas. *Nature* **525**, 104-108, (2015).
6. Mathieson, I. *et al.* Genome-wide patterns of selection in 230 ancient Eurasians. *Nature* **528**, 499-503, (2015).

## Supplementary Information 3

### Population groupings in the ancient Near East

We first assigned “detailed” population labels on the basis of provided information about the provenance, date, and cultural affiliation of sampled individuals and identified visible outliers in PCA and ADMIXTURE analysis (Fig. 1). Individuals from different population labels sometimes did not appear to be genetically distinct, so we sought to identify broader population groupings that would be used for analysis. Doing so is useful in order to reduce the number of distinct population names when there is no significant genetic differentiation between them, and also to enhance statistical power by including more individuals in each population used for analysis. Besides these technical benefits of lumping individuals in broader categories, doing so is also useful in determining whether groupings recognized by archaeologists correspond (or not) to genetically differentiated populations.

To arrive at the “analysis” population labels, we show in Table S3.1  $f_4$ -statistics of the form  $f_4(\text{Population}_1, \text{Population}_2; \text{Test}, \text{Chimp})$ . If every *Test* population (including present-day and ancient populations in our dataset) is symmetrically related to the  $(\text{Population}_1, \text{Population}_2)$  pair, then we may join these in a single population. We generally use a  $|Z| \leq 3$  threshold; this may be conservative, given the number of  $f_4$ -statistics considered, but we aimed to err on the side of caution and only group together populations that appear to form a strong clade to the limits of our resolution.

All pairwise comparisons in Iran suggest that none of the distinct groups can be safely joined into a broader category. The only exception is the pair (Iran\_HotuIIIb, Iran\_Late\_Neolithic) with  $|Z| \leq 2.8$ . However, the low significance here may be due to the small number of shared SNPs (2,096 for the most significant  $Z=2.8$  statistic) in these two singleton individuals. Ganj\_Dareh\_Iran\_Neolithic does not form a clade with Iran\_HotuIIIb (which is putatively Mesolithic, but whose inferred date is uncertain (Supplementary Information, section 1), and may either predate or postdate the Ganj\_Dareh\_Iran\_Neolithic.), or with the succeeding Iran\_Late\_Neolithic. Ganj\_Dareh\_Iran\_Neolithic shares fewer alleles with a Native American group (Ticuna) than does Iran\_HotuIIIb, and it shares fewer alleles with the Anatolian Neolithic than does Iran\_Late\_Neolithic. Thus, we do not consider the non-significant statistic for the (Iran\_HotuIIIb, Iran\_Late\_Neolithic) pair convincing, and with the additional consideration of the uncertainty regarding the age of Iran\_HotuIIIb, we analyze them separately.

In Armenia, the Chalcolithic group differs from the Early Bronze Age group ( $Z=4.1$ ) and so is studied separately. The Middle/Late Bronze Age groups appear to form a clade ( $|Z|\leq 2$ ) and so are grouped into the Armenia\_MLBA group. The Early Bronze Age population is analyzed separately as Armenia\_EBA as it does not form a clade with the Middle Bronze Age ( $|Z|=3$ ) and also forms a tight and distinctive cluster in PCA (Fig. 1b), shifted away from other ancient samples from Armenia in the direction of ancient Iran.

In the Levant, Natufians differ from all other later populations ( $|Z|\geq 4.1$ ) and so are studied separately. The two Neolithic groups (PPNB, PPNC) do not differ significantly from each other ( $|Z|\leq 1.7$ ), and so are grouped into a Levant\_N population. The Bronze Age samples from Jordan differ significantly from the PPNB ( $|Z|=5.0$ ) and form a tight cluster in PCA (Fig. 1b) and are thus studied separately as a Levant\_BA population.

The correspondence between detailed and inclusive population labels is shown in Supplementary Data Table 1. With additional sampling, our power to distinguish between geographically or temporally distinct populations from the three Near Eastern regions may improve. We followed previous studies<sup>1-3</sup> for the groupings of non-Near Eastern populations. Some of these groupings (such as Europe\_LNBA) are not genetically homogeneous (Fig. 1b) but represent several individual populations with varying ancestry (e.g., the Corded Ware group has more ancestry from the steppe than other Late Neolithic/Bronze Age Europeans<sup>2</sup>). We chose a coarser granularity for such groups as their relationships have been treated elsewhere and in the present paper we wish to focus the broader structure of West Eurasian populations, while exploring in greater detail the ancient Near Eastern populations described here for the first time.

**Table S3.1: Statistics of the form  $f_4(\text{Population}_1, \text{Population}_2; \text{Test}, \text{Chimp})$  that we use to motivate population groupings in the ancient Near East. The *Test* population producing the highest/lowest Z-score of this statistic is shown in this table.**

| Population1               | Population2            | Test              | Z     | # SNPs |
|---------------------------|------------------------|-------------------|-------|--------|
| Ganj_Dareh_Iran_Neolithic | Ganj_Dareh_Iran_recent | Sardinian         | -10.0 | 17729  |
| Ganj_Dareh_Iran_Neolithic | Ganj_Dareh_Iran_recent | Himba             | -0.5  | 15142  |
| Ganj_Dareh_Iran_Neolithic | Iran_Chalcolithic      | Anatolia_N        | -12.8 | 20581  |
| Ganj_Dareh_Iran_Neolithic | Iran_Chalcolithic      | Papuan            | -2.0  | 20682  |
| Ganj_Dareh_Iran_Neolithic | Iran_Late_Neolithic    | Anatolia_N        | -4.3  | 11078  |
| Ganj_Dareh_Iran_Neolithic | Iran_Late_Neolithic    | Wayuu             | -0.5  | 11218  |
| Ganj_Dareh_Iran_Neolithic | Iran_HotulIb           | Ticuna            | -3.4  | 3298   |
| Ganj_Dareh_Iran_Neolithic | Iran_HotulIb           | Anatolia_ChL      | 0.1   | 2471   |
| Ganj_Dareh_Iran_recent    | Iran_Chalcolithic      | Dinka             | -2.3  | 17015  |
| Ganj_Dareh_Iran_recent    | Iran_Chalcolithic      | SHG               | 3.3   | 20400  |
| Ganj_Dareh_Iran_recent    | Iran_Late_Neolithic    | Himba             | -1.6  | 9243   |
| Ganj_Dareh_Iran_recent    | Iran_Late_Neolithic    | Europe_MNChL      | 5.0   | 11896  |
| Ganj_Dareh_Iran_recent    | Iran_HotulIb           | Himba             | -1.2  | 2763   |
| Ganj_Dareh_Iran_recent    | Iran_HotulIb           | Europe_EN         | 3.9   | 3564   |
| Iran_Chalcolithic         | Iran_Late_Neolithic    | Himba             | -1.3  | 10405  |
| Iran_Chalcolithic         | Iran_Late_Neolithic    | Europe_EN         | 5.5   | 13253  |
| Iran_Chalcolithic         | Iran_HotulIb           | Steppe_Eneolithic | -0.9  | 2907   |
| Iran_Chalcolithic         | Iran_HotulIb           | Anatolia_N        | 5.5   | 3950   |
| Iran_Late_Neolithic       | Iran_HotulIb           | Pima              | -0.6  | 2163   |
| Iran_Late_Neolithic       | Iran_HotulIb           | Levant_N          | 2.8   | 2096   |
| Armenia_Chalcolithic      | Armenia_EBA            | Iran_N_outlier    | -1.7  | 20000  |
| Armenia_Chalcolithic      | Armenia_EBA            | EHG               | 4.8   | 25055  |
| Armenia_Chalcolithic      | Armenia_LBA            | Tswana            | -0.5  | 11035  |
| Armenia_Chalcolithic      | Armenia_LBA            | Europe_EN         | 4.3   | 14149  |
| Armenia_Chalcolithic      | Armenia_MBA            | Oromo             | -0.9  | 20939  |
| Armenia_Chalcolithic      | Armenia_MBA            | Anatolia_N        | 3.2   | 23875  |
| Armenia_EBA               | Armenia_LBA            | Wayuu             | -1.4  | 13209  |
| Armenia_EBA               | Armenia_LBA            | Iran_N_outlier    | 2.8   | 11337  |
| Armenia_EBA               | Armenia_MBA            | Cree              | -3.0  | 22582  |
| Armenia_EBA               | Armenia_MBA            | Anatolia_ChL      | 2.4   | 14061  |
| Armenia_LBA               | Armenia_MBA            | Levant_N          | -2.0  | 10522  |
| Armenia_LBA               | Armenia_MBA            | Iran_HotulIb      | 1.0   | 2050   |
| Israel_Natufian           | Jordan_EBA             | Kalash            | -7.7  | 11373  |
| Israel_Natufian           | Jordan_EBA             | Oromo             | 0.5   | 10833  |
| Israel_Natufian           | PPNB                   | Europe_MNChL      | -5.8  | 10658  |
| Israel_Natufian           | PPNB                   | Oromo             | 0.9   | 9880   |
| Israel_Natufian           | PPNC                   | Abkhasian         | -4.2  | 4462   |
| Israel_Natufian           | PPNC                   | Oromo             | 0.8   | 4191   |
| Jordan_EBA                | PPNB                   | Anatolia_N        | -2.6  | 19127  |
| Jordan_EBA                | PPNB                   | Iran_N            | 5.0   | 17320  |
| Jordan_EBA                | PPNC                   | Anatolia_N        | -3.0  | 7640   |
| Jordan_EBA                | PPNC                   | GujaratiD         | 2.0   | 7640   |
| PPNB                      | PPNC                   | Wayuu             | -1.1  | 6795   |
| PPNB                      | PPNC                   | GujaratiD         | 1.7   | 6942   |

## References

1. Lazaridis, I. *et al.* Ancient human genomes suggest three ancestral populations for present-day Europeans. *Nature* **513**, 409-413, (2014).
2. Haak, W. *et al.* Massive migration from the steppe was a source for Indo-European languages in Europe. *Nature* **522**, 207-211, (2015).
3. Mathieson, I. *et al.* Genome-wide patterns of selection in 230 ancient Eurasians. *Nature* **528**, 499-503, (2015).



## Supplementary Information 4

### Pervasive Basal Eurasian ancestry in the ancient Near East

It has been proposed<sup>1</sup> that early European farmers had Basal Eurasian ancestry based on the observation that the Stuttgart<sup>1</sup> early farmer and Eurasian hunter-gatherers such as Loschbour<sup>1</sup>, LaBraná<sup>2</sup>, MA1<sup>3</sup>, and Motala12<sup>1</sup> had significantly positive  $f_4$ -statistics of the form  $f_4(\text{Eurasian hunter-gatherer}, \text{Stuttgart}; \text{eastern non-African}, \text{Chimp})$ , for diverse eastern non-African groups from East Asia, the Andaman Islands, Papua New Guinea, North Asia and the Americas. A parsimonious explanation for these statistics that does not involve gene flow that affected all eastern non-African groups from west Eurasia or vice versa, is that the early farmers of Europe possessed ancestry from a deeply diverged lineage that split off from other Eurasians before the split of eastern non-Africans from west Eurasian hunter-gatherers.

Subsequent research on the Ust\_Ishim<sup>4</sup> and Oase1<sup>5</sup> individuals has revealed that these two individuals from Upper Paleolithic Siberia and Europe respectively share more alleles with present-day eastern non-Africans than with Europeans, but are symmetrically related to eastern non-Africans and ancient European hunter-gatherers. This finding has been interpreted as supporting the idea that recent Europeans have ancestry that was not present in ancient hunter-gatherers from Eurasia and which—because of its earlier split—is diluting the affinity of these Upper Paleolithic Eurasians to present-day Europeans. The genome of Kostenki14<sup>6</sup> was interpreted as having the same kind of Basal Eurasian ancestry as early European farmers, based on the observation that east Asians do *not* share more alleles with it than they do with early farmers<sup>6</sup>. However, this observation is also consistent with Kostenki14 having a different type of ancestry than the early farmers, or alternatively later gene flow between ancestors of present-day eastern non-Africans and Eurasian hunter-gatherers (see ref.7).

The prediction that the Basal Eurasian ancestry in present-day Europeans came from the Near East via early farmers<sup>1</sup> was not based on ancient genomes from the Near East (which were not available at the time), but rather on the observation that diverse Eurasian hunter-gatherers from Europe and Siberia do not differ significantly in their shared genetic drift with eastern non-Africans but systematically shared more than the early farmers did. As the ancient farmers could be modeled as a mixture of European hunter-gatherers and a Near Eastern source population<sup>1</sup>, it followed that their Basal Eurasian ancestry was derived from the Near Eastern portion of their ancestry.

### Basal Eurasian ancestry was prevalent in the ancient Near East

The current study confirms the presence of Basal Eurasian ancestry in the ancient Near East by the statistic  $f_4(\text{Ancient West Eurasian Test}, \text{Eastern non-African or European/Siberian hunter-gatherer } Y; \text{Ust_Ishim}, \text{Chimp})$ . This statistic tests whether the topology  $((\text{Test}, Y), \text{Ust_Ishim}, \text{Chimp})$  is valid (in which case it is not significantly different from zero), or the Test population has Basal Eurasian ancestry (in which case it has a negative value) (Fig. S4.1). It is also robust to both later gene flow within Eurasia as well as archaic admixture in an eastern non-African population such as Papuans who have more archaic admixture than other Eurasians<sup>8</sup> (Fig. S4.1).

**Figure S4.1: Testing for Basal Eurasian ancestry in a population  $X$  with the statistic  $f_4(\text{Ancient Eurasian Test}, \text{Eastern non-African or European/Siberian hunter-gatherer } Y; \text{Ust_Ishim}, \text{Chimp})$ .** If population Test traces its ancestry in part from a Basal Eurasian population, then the drift path  $z$  is traversed in the opposite direction in the paths Basal\_Eurasian  $\rightarrow$  Y and Ust\_Ishim  $\rightarrow$  Chimp. Gene flow between  $X$  and  $Y$  (i.e., not a clean split as shown here) does not affect the value of the statistic either positively or negatively. Archaic admixture in population  $Y$  affects the statistic in a *positive* direction as the drift paths X/Basal Eurasian  $\rightarrow$  Archaic Eurasian and Ust\_Ishim  $\rightarrow$  Chimp are traversed in the same direction; thus, this will not result in a spurious negative  $f_4$ -statistic.

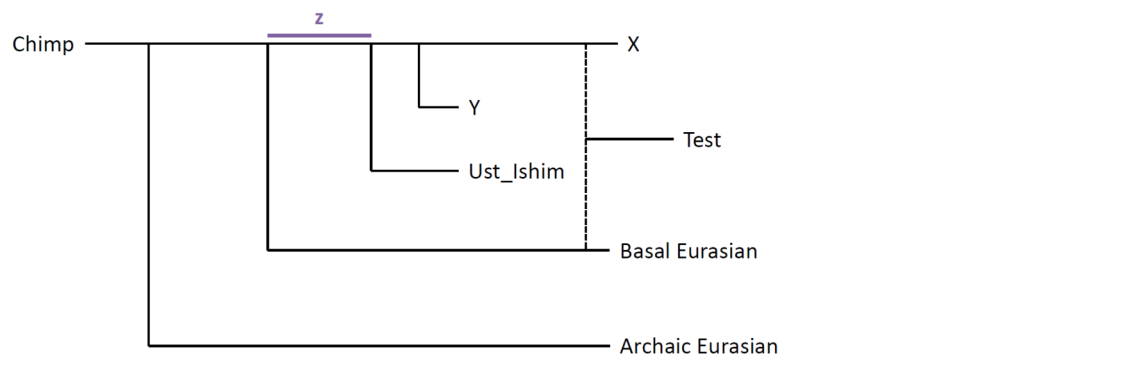

The Z-score of this statistic is shown in Table S4.1 for diverse ancient Eurasian populations on the *HO* dataset.

**Table S4.1: Z-score of the statistic  $f_4$ (Ancient Eurasian Test, Eastern non-African or European/Siberian hunter-gatherer Y; Ust\_Ishim, Chimp) on the HO dataset.**

|                   | Han  | Onge | Papuan | Kostenki14 | MA1  | WHG  | EHG  | SHG  | Switzerland_HG |
|-------------------|------|------|--------|------------|------|------|------|------|----------------|
| Anatolia_ChL      | -4.5 | -4.2 | -0.3   | -2.1       | -2.8 | -3.6 | -1.6 | -2.9 | -2.9           |
| Anatolia_N        | -6.8 | -6.4 | -0.2   | -2.3       | -3.6 | -5.3 | -2.7 | -5.4 | -3.5           |
| Armenia_ChL       | -4.7 | -4.7 | 0.8    | -1.3       | -2.3 | -3.4 | -1.1 | -3.2 | -2.6           |
| Armenia_EBA       | -6.4 | -6.0 | -0.3   | -2.3       | -3.3 | -4.6 | -2.8 | -4.6 | -3.3           |
| Armenia_MLBA      | -5.9 | -5.6 | -0.2   | -2.3       | -3.0 | -4.5 | -1.8 | -4.0 | -3.5           |
| CHG               | -4.6 | -4.5 | 0.4    | -1.5       | -2.9 | -3.1 | -1.4 | -3.0 | -2.4           |
| EHG               | -3.2 | -3.2 | 1.6    | -0.6       | -1.4 | -1.5 |      | -1.5 | -1.2           |
| Europe_EN         | -6.2 | -5.8 | 0.3    | -1.9       | -3.3 | -4.7 | -1.9 | -4.6 | -3.0           |
| Europe_LNBA       | -5.1 | -4.7 | 1.4    | -0.9       | -2.3 | -3.2 | -0.7 | -3.0 | -1.9           |
| Europe_MNChL      | -5.1 | -5.0 | 0.9    | -1.3       | -2.6 | -3.8 | -1.2 | -3.6 | -2.3           |
| Iberia_BA         | -4.4 | -4.1 | 0.0    | -1.7       | -2.6 | -3.6 | -1.5 | -3.7 | -2.7           |
| Iran_ChL          | -6.2 | -6.1 | -0.4   | -2.3       | -3.6 | -4.9 | -2.5 | -4.7 | -3.6           |
| Iran_LN           | -3.7 | -3.7 | 0.6    | -0.8       | -2.1 | -2.5 | -1.0 | -2.1 | -2.2           |
| Iran_HotuIIIb     | -3.7 | -4.1 | -0.4   | -1.6       | -2.2 | -3.3 | -1.6 | -2.4 | -3.4           |
| Iran_N            | -7.1 | -6.9 | -1.7   | -3.7       | -4.7 | -5.6 | -3.6 | -5.6 | -4.4           |
| Iran_recent       | -6.0 | -5.7 | -0.8   | -2.7       | -3.4 | -4.5 | -3.2 | -4.3 | -3.8           |
| Kostenki14        | -2.1 | -2.1 | 1.8    |            | -1.0 | -0.9 | 0.6  | -0.5 | -0.5           |
| Levant_BA         | -8.2 | -8.0 | -1.8   | -4.0       | -4.6 | -7.3 | -4.0 | -6.7 | -5.4           |
| Levant_N          | -8.8 | -8.2 | -2.9   | -5.0       | -5.6 | -7.7 | -5.5 | -7.4 | -5.7           |
| MA1               | -0.8 | -0.9 | 2.8    | 1.0        |      | 0.2  | 1.4  | 0.7  | 0.2            |
| Natufian          | -7.0 | -6.9 | -2.1   | -4.2       | -4.3 | -6.3 | -3.7 | -6.0 | -4.8           |
| SHG               | -2.1 | -2.3 | 2.6    | 0.5        | -0.7 | -0.7 | 1.5  |      | -0.1           |
| Steppe_EMBA       | -4.8 | -4.5 | 1.5    | -0.9       | -2.1 | -2.7 | -0.3 | -2.5 | -1.7           |
| Steppe_Eneolithic | -2.5 | -2.3 | 2.0    | -0.1       | -1.0 | -1.0 | 0.8  | -0.8 | -0.5           |
| Steppe_IA         | -2.4 | -2.1 | 1.9    | -0.1       | -1.0 | -1.0 | 0.8  | -0.5 | -0.4           |
| Steppe_MLBA       | -4.6 | -4.4 | 1.5    | -0.8       | -2.0 | -2.9 | -0.5 | -2.7 | -1.8           |
| Switzerland_HG    | -1.5 | -1.7 | 2.3    | 0.5        | -0.2 | -0.3 | 1.2  | 0.1  |                |
| WHG               | -1.6 | -1.8 | 2.8    | 0.9        | -0.2 |      | 1.5  | 0.7  | 0.3            |

**Table S4.2: Z-score of the statistic  $f_4$ (Ancient Eurasian Test, Eastern non-African or European/Siberian hunter-gatherer Y; Ust\_Ishim, Chimp) on the HOIII dataset.**

|                   | Kostenki14 | MA1  | WHG  | EHG  | SHG  | Switzerland_HG |
|-------------------|------------|------|------|------|------|----------------|
| Anatolia_ChL      | -2.6       | -3.7 | -4.0 | -2.3 | -3.8 | -3.3           |
| Anatolia_N        | -2.6       | -4.5 | -5.5 | -3.3 | -6.1 | -3.6           |
| Armenia_ChL       | -1.3       | -3.1 | -3.1 | -1.5 | -3.9 | -2.2           |
| Armenia_EBA       | -2.1       | -4.0 | -4.0 | -2.8 | -4.9 | -3.2           |
| Armenia_MLBA      | -2.6       | -4.4 | -4.9 | -2.6 | -5.0 | -3.7           |
| CHG               | -2.5       | -4.1 | -4.2 | -2.8 | -4.8 | -3.2           |
| EHG               | -0.5       | -1.8 | -1.3 |      | -1.9 | -1.1           |
| Europe_EN         | -2.1       | -4.0 | -4.9 | -2.5 | -5.6 | -3.1           |
| Europe_LNBA       | -1.2       | -3.1 | -3.4 | -1.4 | -4.2 | -1.9           |
| Europe_MNChL      | -1.7       | -3.4 | -4.2 | -1.8 | -4.7 | -2.5           |
| Iberia_BA         | -1.4       | -3.3 | -3.2 | -1.8 | -3.5 | -2.2           |
| Iran_ChL          | -2.6       | -4.5 | -4.9 | -3.4 | -5.5 | -3.7           |
| Iran_LN           | -2.2       | -3.6 | -3.6 | -2.4 | -4.0 | -3.3           |
| Iran_HotuIIIb     | -2.9       | -2.8 | -4.2 | -3.3 | -4.8 | -4.3           |
| Iran_N            | -4.3       | -6.0 | -6.2 | -4.7 | -6.9 | -5.3           |
| Iran_recent       | -2.8       | -4.4 | -4.7 | -3.5 | -4.8 | -4.0           |
| Kostenki14        |            | -1.3 | -0.8 | 0.5  | -0.9 | -0.4           |
| Levant_BA         | -3.9       | -5.0 | -6.8 | -4.3 | -7.2 | -5.4           |
| Levant_N          | -5.8       | -6.8 | -8.4 | -6.4 | -8.7 | -6.7           |
| MA1               | 1.3        |      | 0.8  | 1.8  | 0.9  | 0.8            |
| Natufian          | -5.5       | -6.1 | -8.1 | -6.0 | -8.4 | -6.6           |
| SHG               | 0.9        | -0.9 | 0.1  | 1.9  |      | 0.5            |
| Steppe_EMBA       | -0.8       | -2.5 | -2.4 | -0.7 | -3.2 | -1.4           |
| Steppe_Eneolithic | 0.0        | -1.8 | -0.7 | 0.5  | -1.2 | -0.4           |
| Steppe_IA         | -0.1       | -1.7 | -0.9 | 0.5  | -1.1 | -0.4           |
| Steppe_MLBA       | -1.1       | -2.9 | -3.2 | -1.2 | -3.8 | -1.8           |
| Switzerland_HG    | 0.4        | -0.8 | -0.5 | 1.1  | -0.5 |                |
| WHG               | 0.8        | -0.8 |      | 1.3  | -0.1 | 0.5            |

With the exception of the Y=Papuan column (where the statistic has a positive bias due to archaic admixture in this population; Fig. S4.1), the statistic is significantly negative ( $Z < -3$ ) for all columns in four populations: Iran\_N and all three populations from the Levant (Natufians, Levant\_N, and Levant\_BA). It is also significantly negative for all populations of partial Near Eastern ancestry when Y=Han, Onge, the present-day eastern non-African populations without substantial Denisovan admixture. To gain power, we repeated this analysis on the *HOIII* dataset, which has a larger number of SNPs, and show the results in Table S4.2. European hunter-gatherers (EHG, WHG, SHG, Kostenki14, Switzerland\_HG) show no evidence of Basal Eurasian ancestry, but populations of Near Eastern or partial Near Eastern ancestry do, reaching significance when Y=MA1, WHG, or SHG and being negative (although not always reaching significance at the  $|Z| > 3$  threshold) for the other hunter-gatherer groups.

We conclude that ancient Near Eastern populations and populations of partial Near Eastern ancestry have evidence of deriving part of their ancestry from a lineage that splits off prior to Ust\_Ishim (and thus prior to ~45,000 years ago).

#### Estimating Basal Eurasian ancestry with a simple $f_4$ -ratio

It is possible to estimate the proportion of ancestry derived from a Basal Eurasian population, assuming the topology of Fig. S4.2. The idea is to find a genetic drift path  $x$  equal to the statistic  $f_4(\text{African, West Eurasian; A, B})$ , where *West Eurasian* is a population without Basal Eurasian ancestry and A, B are two “ingroups” to the Basal Eurasian split node. The deepest split within the triple (A, B, West Eurasian) must occur after the split of the Basal Eurasians and *West Eurasian* must share a drift path length  $x$  with B that is not shared with A.

**Figure S4.2: A topology for estimating the proportion  $\alpha$  of Basal Eurasian ancestry.** The ratio of the statistics  $f_4(\text{Test, West Eurasian; A, B}) / f_4(\text{African, West Eurasian; A, B}) = \alpha x / x = \alpha$  yields this proportion.

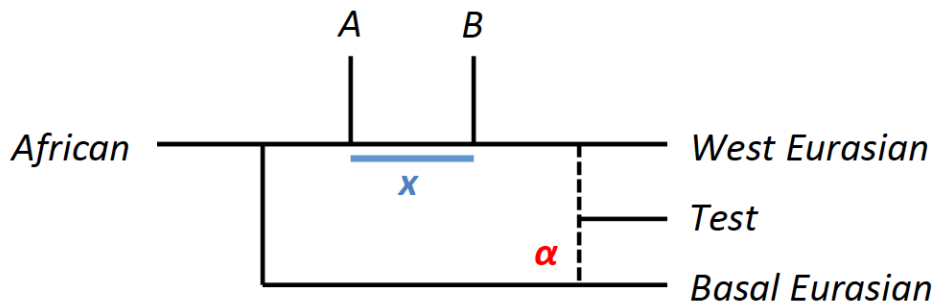

In Ref.1 we used A=Onge, B=MA1, West Eurasian=Loschbour (representative of WHG), and Test=Stuttgart (representative of Europe\_EN).

We can now use A=Ust\_Ishim instead of Onge as Ust\_Ishim is symmetrically related to eastern non-Africans, MA1, and European hunter-gatherers (Table S4.1 and Table S4.2) and represents an even earlier split than that between Onge and European hunter-gatherers. Thus, we are estimating Basal Eurasian ancestry that stems from a clade not only prior to the split of European hunter-gatherers, MA1, and eastern non-Africans<sup>1</sup> but prior to the even earlier split of Ust\_Ishim<sup>4,7</sup>.

Using West\_Eurasian=WHG as in Ref.1, we must ensure that the topology of Fig. S4.1 holds. We use MA1 and Kostenki14 (the two most ancient genomes sharing genetic drift with later West Eurasians) as candidates for B.

First, we examine the basic topology (without adding the Test population yet). In Table S4.3 we show  $f_4$ -statistics involving the set of four populations (Mbuti, A=Ust\_Ishim, B=MA1 or Kostenki14, West Eurasian=WHG). These statistics show that (Kostenki14, WHG) and (MA1, WHG) form clades with respect to (Mbuti, Ust\_Ishim) and that they mutually share more alleles with each other than with Ust\_Ishim. Thus, the basic topology is validated.

**Table S4.3: Validating the topology of Fig. S4.2.**

| <b>X</b> | <b>Y</b>   | <b>Z</b>   | <b>W</b>   | <b><math>f_4(X,Y;W,Z)</math></b> | <b>Z</b> |
|----------|------------|------------|------------|----------------------------------|----------|
| Mbuti    | Ust_Ishim  | Kostenki14 | WHG        | -0.00016                         | -0.3     |
| Mbuti    | WHG        | Ust_Ishim  | Kostenki14 | 0.00750                          | 12.3     |
| Mbuti    | Kostenki14 | Ust_Ishim  | WHG        | 0.00734                          | 11.4     |
| Mbuti    | Ust_Ishim  | MA1        | WHG        | -0.00092                         | -1.7     |
| Mbuti    | WHG        | Ust_Ishim  | MA1        | 0.00777                          | 13.0     |
| Mbuti    | MA1        | Ust_Ishim  | WHG        | 0.00686                          | 10.5     |

Next, we examine whether the Test population shares more genetic drift with West\_Eurasian=WHG than with B=MA1. In Fig. S4.3a we show the statistic  $f_4(\text{WHG, MA1; Test, Ust_Ishim})$ , showing that EHG and populations from early Iran are symmetrically related to (WHG, MA1), thus violating the topology of Fig. S4.2 in the sense that it is consistent with  $x=0$ . However, Kostenki14, which is the earliest known individual sharing West Eurasian-specific ancestry<sup>6</sup> does not violate the topology of Fig. S4.2 as the statistic  $f_4(\text{WHG, Kostenki14; Test, Ust_Ishim})$  is significantly positive (Fig. S4.3b). Thus, we use B=Kostenki14. In the qpAdm section at the end of this note we will see additional evidence

that MA1 may not be a good outgroup for estimating Basal Eurasian ancestry and that Kostenki14 provides invaluable information to do so.

**Figure S4.3: Statistic  $f_4(\text{WHG}, \text{MA1 or Kostenki14}; \text{Test}, \text{Ust\_Ishim})$ .** The value of the statistic  $\sim 3$  standard errors is shown. (a) Populations from ancient Iran and EHG do not share significantly more alleles with WHG than with MA1 and are thus not consistent with the topology of Fig. S4.1. (b) All *Test* populations share significantly more alleles with WHG than with Kostenki14, and are thus consistent with the topology of Fig. S4.2.

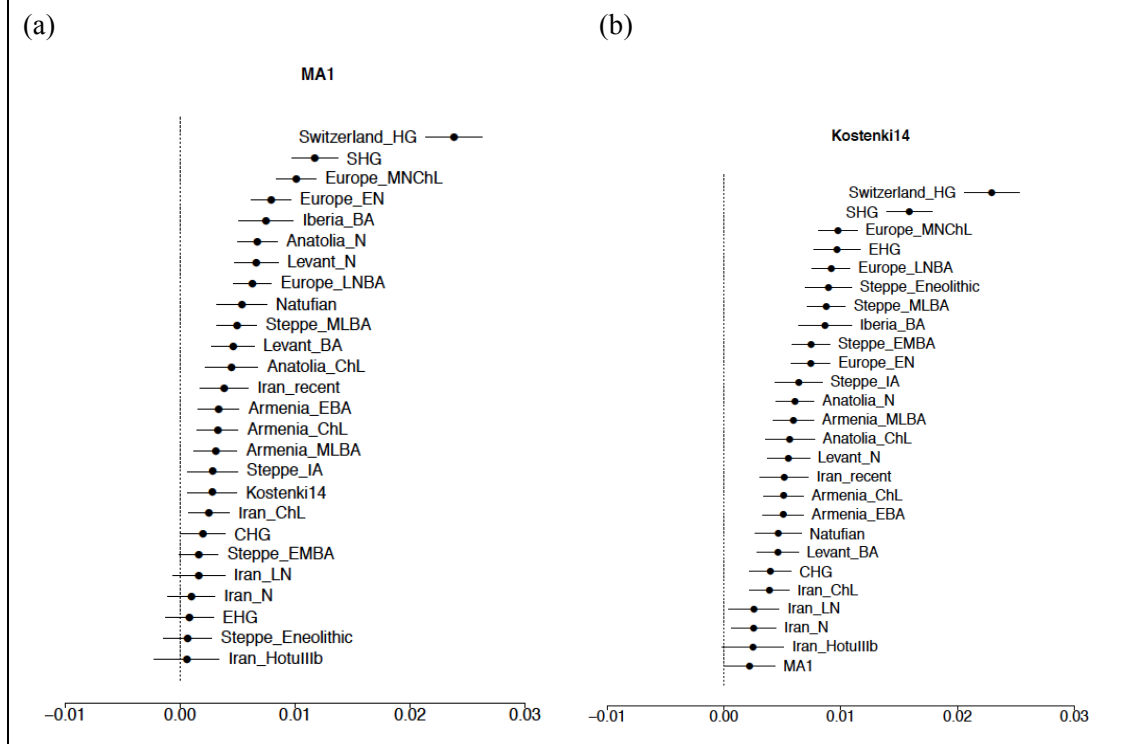

Basal Eurasian ancestry can be inferred using the following  $f_4$ -ratio:

$$x = f_4(\text{Mbuti}, \text{WHG}; \text{Ust\_Ishim}, \text{Kostenki14})$$

$$\alpha x = f_4(\text{Test}, \text{WHG}; \text{Ust\_Ishim}, \text{Kostenki14})$$

The estimate of the mixture proportion  $\alpha$  is shown in Table S4.4. We have also estimated this mixture proportion in a model-based way using the ADMIXTUREGRAPH software<sup>9</sup> which allows us to specify a phylogeny with added admixture edges and estimate its parameters (drift lengths and mixture proportions). We test the phylogeny of Fig. S4.2 and show a fitted model for the Iran\_N population in Fig. S4.4.

**Table S4.4: Mixture proportions estimated with the ratio  $f_4(\text{Test, WHG; Ust\_Ishim, Kostenki14})/f_4(\text{Mbuti, WHG; Ust\_Ishim, Kostenki14})$  and with ADMIXTUREGRAPH. The  $Z_{\text{diff}}$  column represents the number of standard errors of the  $f_4$ -ratio by which the ADMIXTUREGRAPH estimate differs.**

| <i>Test</i>       | <i><math>f_4</math>-ratio estimate</i> | <i>Standard Error</i> | <i>ADMIXTUREGRAPH estimate</i> | <i><math>Z_{\text{diff}}</math></i> |
|-------------------|----------------------------------------|-----------------------|--------------------------------|-------------------------------------|
| Anatolia_ChL      | 0.260                                  | 0.084                 | 0.207                          | 0.6                                 |
| Anatolia_N        | 0.344                                  | 0.047                 | 0.363                          | 0.4                                 |
| Armenia_ChL       | 0.365                                  | 0.054                 | 0.366                          | 0.0                                 |
| Armenia_EBA       | 0.428                                  | 0.058                 | 0.444                          | 0.3                                 |
| Armenia_MLBA      | 0.473                                  | 0.058                 | 0.491                          | 0.3                                 |
| CHG               | 0.505                                  | 0.066                 | 0.497                          | 0.1                                 |
| EHG               | 0.194                                  | 0.069                 | 0.261                          | 1.0                                 |
| Europe_EN         | 0.323                                  | 0.047                 | 0.342                          | 0.4                                 |
| Europe_LNBA       | 0.331                                  | 0.040                 | 0.366                          | 0.9                                 |
| Europe_MNChL      | 0.293                                  | 0.043                 | 0.310                          | 0.4                                 |
| Iberia_BA         | 0.277                                  | 0.087                 | 0.428                          | 1.7                                 |
| Iran_ChL          | 0.446                                  | 0.056                 | 0.464                          | 0.3                                 |
| Iran_LN           | 0.596                                  | 0.089                 | 0.627                          | 0.3                                 |
| Iran_Hotulllb     | 0.667                                  | 0.114                 | 0.697                          | 0.3                                 |
| Iran_N            | 0.591                                  | 0.075                 | 0.591                          | 0.0                                 |
| Iran_recent       | 0.394                                  | 0.082                 | 0.394                          | 0.0                                 |
| Levant_BA         | 0.401                                  | 0.061                 | 0.393                          | 0.1                                 |
| Levant_N          | 0.385                                  | 0.063                 | 0.367                          | 0.3                                 |
| MA1               | 0.364                                  | 0.089                 | 0.286                          | 0.9                                 |
| Natufian          | 0.460                                  | 0.082                 | 0.438                          | 0.3                                 |
| SHG               | 0.170                                  | 0.050                 | 0.200                          | 0.6                                 |
| Steppe_EMBA       | 0.367                                  | 0.044                 | 0.402                          | 0.8                                 |
| Steppe_Eneolithic | 0.314                                  | 0.066                 | 0.302                          | 0.2                                 |
| Steppe_IA         | 0.280                                  | 0.076                 | 0.269                          | 0.1                                 |
| Steppe_MLBA       | 0.327                                  | 0.043                 | 0.377                          | 1.2                                 |
| Switzerland_HG    | 0.027                                  | 0.074                 | 0.092                          | 0.9                                 |



**Figure S4.4: A fitted model for the topology of Fig. S4.3 for the *Test*=Iran\_N population. The estimated mixture proportions for other *Test* populations are listed in Table S4.4. Drift lengths are multiplied by 1,000.**

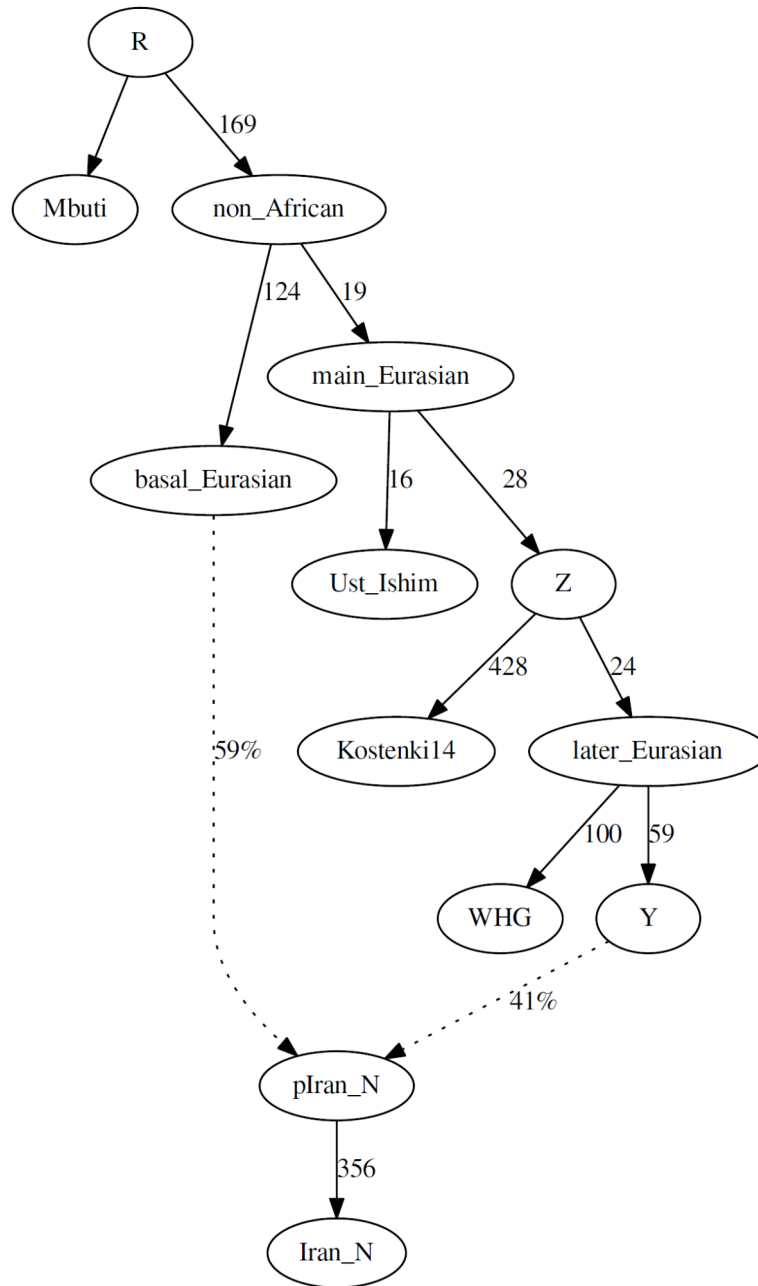

**Alternative explanations for non-zero estimated Basal Eurasian ancestry in Ancient North Eurasian-related populations using the  $f_4$ -ratio**

We were intrigued by the fact that X=MA1 or SHG or EHG, populations related to “Ancient North Eurasians”, all have a positive estimate of “Basal Eurasian” ancestry according to the  $f_4$ -ratio estimate of Table S4.4, but do not have evidence of a significantly negative  $f_4(X, \text{Kostenki14}; \text{Ust_Ishim}, \text{Chimp})$  statistic (Table S4.2) and thus it does not appear that Ust\_Ishim shares more alleles with Kostenki14 than with X (which is expected if X has Basal

Eurasian ancestry). Thus, we do not think there is convincing evidence that these populations have Basal Eurasian ancestry and we consider here alternative explanations that would infer pseudo-Basal Eurasian for them.

A possible explanation, investigated further below, is that the “Basal Eurasian” ancestry in these populations branches off just prior to Ust\_Ishim (minimizing the non\_African→main\_Eurasian genetic drift). Such a solution would preserve a statistic  $f_4(X, \text{Kostenki14}; \text{Ust\_Ishim}, \text{Chimp}) \sim 0$ , as (Basal Eurasian, Kostenki14, Ust\_Ishim) would form an effective trifurcation.

A second possibility is illustrated in Fig. S4.5:

**Figure S4.5: Bias in estimate of Basal Eurasian ancestry for populations tracing part of their ancestry from a split earlier than Kostenki14.** If  $\beta=0$  then the topology of Fig. S4.2 applies. If population  $X$  traces part of its ancestry to a split between Ust\_Ishim and Kostenki14 then the value of the statistic  $f_4(X, \text{WHG}; \text{Ust\_Ishim}, \text{Kostenki14}) = \alpha x + (1-\alpha)\beta y$ . This statistic is in the numerator of the  $f_4$ -ratio used in Table S4.4 to estimate Basal Eurasian admixture in a population, and can be positive even if  $\alpha=0$  (no Basal Eurasian ancestry).

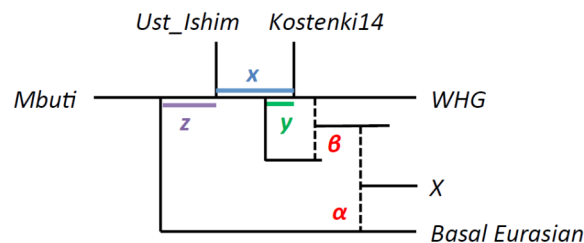

### Basal Eurasian ancestry is possible for many ancient populations

Fig. S4.5 shows how a positive estimate of Basal Eurasian ancestry is possible even in the absence of such ancestry. Such a bias may be present in a population  $X$ , as long as it traces part  $(\beta(1-\alpha))$  of its ancestry from a population before the Kostenki14 but after the Ust\_Ishim split (Fig. S4.5).

To investigate this bias we used ADMIXTUREGRAPH to write down the model of Fig. S4.5 and fit it for different populations. We show a fitted model in Fig. S4.6

**Figure S4.6: A fitted model for the topology of Fig. S4.5 for X=Iran\_N population. Key parameters of the fitted model are listed in Table S4.5. This model is a generalization of the model of Fig. S4.4; both fit statistically in the sense that they do not have any outliers  $|Z|>3$ , but the present model suggests that Iran\_N may have some ancestry that splits off prior to the (Kostenki14, WHG) split. This model corresponds to the topology of Fig. S4.5 with  $y$  equal to the drift path  $Z \rightarrow Z1$ .**

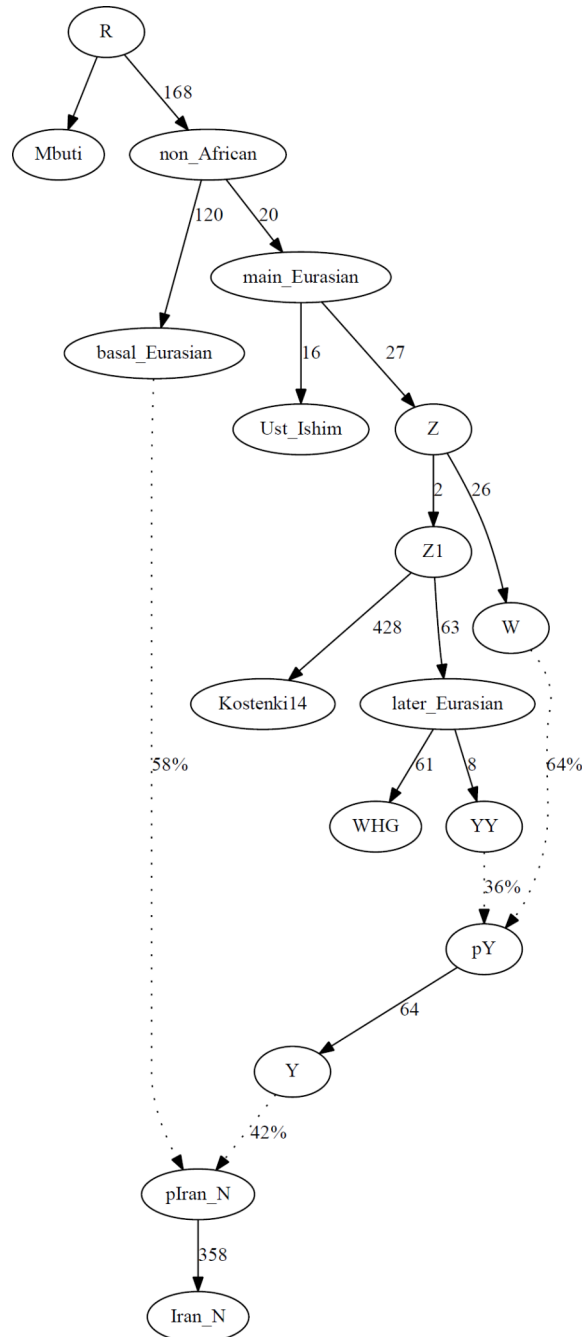

**Table S4.5: Parameters of model of Figs. S4.5,6.**

| <i>Test</i>       | $\alpha$ | $\beta$ | $z$                              | $Y$         | $x-y$                  |        |
|-------------------|----------|---------|----------------------------------|-------------|------------------------|--------|
|                   |          |         | <b>non_African→main_Eurasian</b> | <b>Z→Z1</b> | <b>main_Eurasian→Z</b> |        |
| Anatolia_ChL      | 0.2067   | 0.6583  |                                  | 0.0574      | 0.0000                 | 0.0298 |
| Anatolia_N        | 0.3629   | 0.5607  |                                  | 0.0218      | 0.0000                 | 0.0283 |
| Armenia_ChL       | 0.3663   | 0.6131  |                                  | 0.0205      | 0.0000                 | 0.0276 |
| Armenia_EBA       | 0.4439   | 0.5304  |                                  | 0.0207      | 0.0000                 | 0.0281 |
| Armenia_MLBA      | 0.4906   | 0.4026  |                                  | 0.0176      | 0.0000                 | 0.0283 |
| CHG               | 0.4965   | 0.5787  |                                  | 0.0153      | 0.0000                 | 0.0283 |
| EHG               | 0.2605   | 0.4953  |                                  | 0.0075      | 0.0000                 | 0.0283 |
| Europe_EN         | 0.3420   | 0.5283  |                                  | 0.0238      | 0.0000                 | 0.0283 |
| Europe_LNBA       | 0.3661   | 0.4462  |                                  | 0.0167      | 0.0000                 | 0.0284 |
| Europe_MNChL      | 0.3098   | 0.4709  |                                  | 0.0203      | 0.0000                 | 0.0284 |
| Iberia_BA         | 0.4228   | 0.3022  |                                  | 0.0167      | 0.0010                 | 0.0275 |
| Iran_ChL          | 0.4642   | 0.5947  |                                  | 0.0267      | 0.0000                 | 0.0281 |
| Iran_LN           | 0.5953   | 0.4819  |                                  | 0.0201      | 0.0046                 | 0.0224 |
| Iran_HotulIb      | 0.6792   | 0.6748  |                                  | 0.0142      | 0.0028                 | 0.0282 |
| Iran_N            | 0.5784   | 0.6365  |                                  | 0.0198      | 0.0015                 | 0.0265 |
| Iran_recent       | 0.3939   | 0.4882  |                                  | 0.0262      | 0.0000                 | 0.0277 |
| Levant_BA         | 0.3929   | 0.6185  |                                  | 0.0317      | 0.0000                 | 0.0279 |
| Levant_N          | 0.3673   | 0.5420  |                                  | 0.0394      | 0.0000                 | 0.0279 |
| MA1               | 0.2854   | 0.7655  |                                  | 0.0000      | 0.0000                 | 0.0274 |
| Natufian          | 0.4378   | 0.5032  |                                  | 0.0358      | 0.0000                 | 0.0276 |
| SHG               | 0.1994   | 0.4710  |                                  | 0.0087      | 0.0000                 | 0.0285 |
| Steppe_EMBA       | 0.4015   | 0.4798  |                                  | 0.0137      | 0.0000                 | 0.0284 |
| Steppe_Eneolithic | 0.3021   | 0.4689  |                                  | 0.0180      | 0.0000                 | 0.0288 |
| Steppe_IA         | 0.2688   | 0.5818  |                                  | 0.0194      | 0.0000                 | 0.0285 |
| Steppe_MLBA       | 0.3766   | 0.4523  |                                  | 0.0159      | 0.0000                 | 0.0284 |
| Switzerland_HG    | 0.0892   | 0.3481  |                                  | 0.0068      | 0.0000                 | 0.0290 |

This procedure suggests that populations from ancient Iran may have ancestry from a population that splits off prior to Kostenki14 but after Ust\_Ishim, as they have non-zero values (Table S4.5) of parameter  $y$  (Fig. S4.5). A different solution is arrived at for MA1 and EHG/SHG. While “Basal Eurasian” admixture is inferred for these populations, they also have low (or in the case of MA1 zero) drift  $z$  on the non\_African→main\_Eurasian branch. By forming, effectively, the trifurcation between (“Basal Eurasian”, Ust\_Ishim, and Kostenki14) previously mentioned.

**Basal Eurasian ancestry is not necessary for European hunter-gatherer populations or MA1**

The solutions of Table S4.5 optimize all graph parameters simultaneously. We next fixed the mixture proportion  $\alpha$  of Basal Eurasian ancestry in the interval [0,1] in 0.01 increments and

re-fit the model. We show the Z-score of the worst outlier in Fig. S4.7 for the model of Fig. S4.6 and for the Iran\_N population.

**Figure S4.7: Worst  $f$ -statistic outlier Z-score for different amount of Basal Eurasian proportion  $\alpha$  of the model of Fig. S4.6.** The  $|Z|=3$  line is shown. The worst outlier for  $\alpha=0$  is  $f_4(\text{Mbuti}, \text{Ust\_Ishim}; \text{Iran\_N}, \text{WHG})$  whose estimated value is 5.3 standard errors higher than its fitted value. The worst outlier for  $\alpha=1$  is  $f_4(\text{Mbuti}, \text{Iran\_N}; \text{Ust\_Ishim}, \text{WHG})$  whose estimated value is 9.2 standard errors higher than its fitted value. The twin constraints of (i) Ust\_Ishim sharing more drift with WHG than with Iran\_N, and of Iran\_N sharing more drift with WHG than with Ust\_Ishim make infeasible any models that derive all (or most) of the ancestry of Iran\_N from either Basal Eurasians or a population related to WHG.

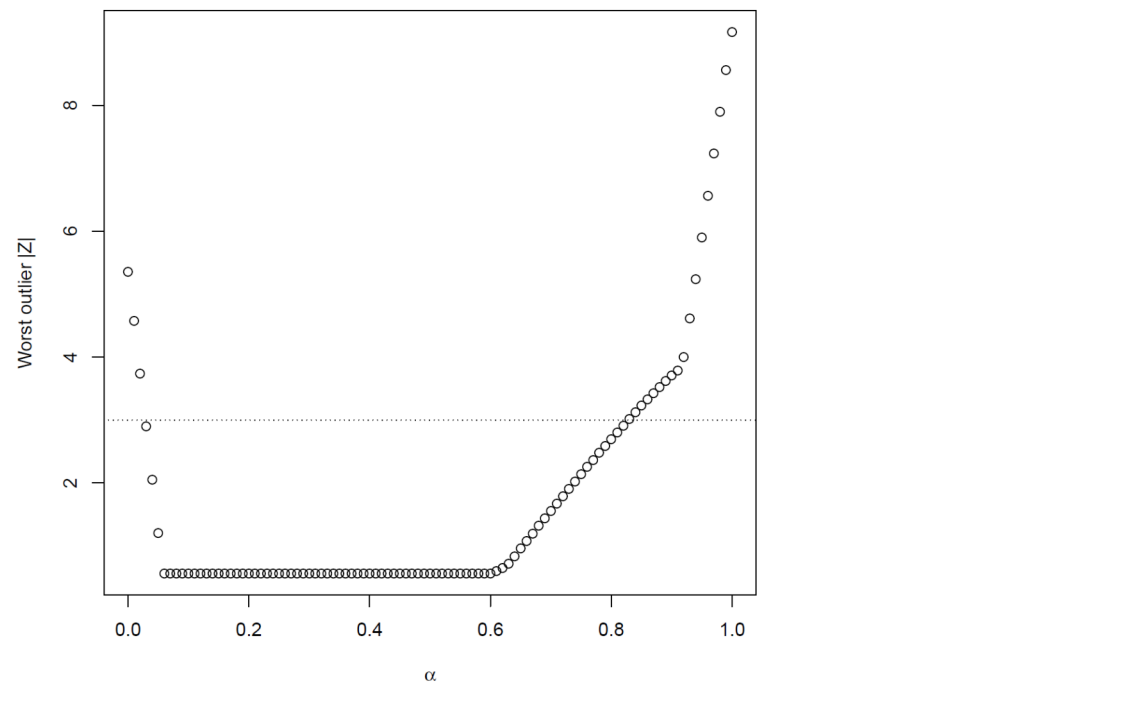

We list the feasible solution range (defined as the values of  $\alpha$  for which the fitted model had no  $|Z|>3$  outlier  $f$ -statistics) for each population in Table S4.6.

**Table S4.6: Feasible ranges of Basal Eurasian admixture for different populations**

| <b>Test</b>       | <b>Min</b> | <b>Max</b> |
|-------------------|------------|------------|
| Anatolia_ChL      | 3          | 47         |
| Anatolia_N        | 3          | 49         |
| Armenia_ChL       | 2          | 52         |
| Armenia_EBA       | 3          | 61         |
| Armenia_MLBA      | 3          | 64         |
| CHG               | 2          | 68         |
| EHG               | 0          | 44         |
| Europe_EN         | 3          | 46         |
| Europe_LNBA       | 3          | 47         |
| Europe_MNChL      | 2          | 42         |
| Iberia_BA         | 0          | 70         |
| Iran_ChL          | 5          | 61         |
| Iran_LN           | 4          | 88         |
| Iran_HotulIb      | 0          | 97         |
| Iran_N            | 3          | 82         |
| Iran_recent       | 3          | 62         |
| Levant_BA         | 5          | 56         |
| Levant_N          | 6          | 55         |
| MA1               | 0          | 52         |
| Natufian          | 5          | 68         |
| SHG               | 0          | 33         |
| Steppe_EMBA       | 2          | 52         |
| Steppe_Eneolithic | 1          | 49         |
| Steppe_IA         | 1          | 47         |
| Steppe_MLBA       | 2          | 49         |
| Switzerland_HG    | 0          | 27         |

While no Basal Eurasian ancestry is feasible for MA1, EHG, SHG, and Switzerland\_HG at least some such ancestry is necessary for the other populations. The range of this ancestry is wide. A useful illustration of the model behavior for different feasible values of  $\alpha$  is shown in Fig. S4.8

A population with Basal Eurasian admixture has a positive  $f_4(\text{Mbuti}, \text{Ust_Ishim}; X, \text{Kostenki14}) = \alpha z$  (Fig. S4.5). This is the equation of a hyperbola, and is the main explanation for the shape of the curve of Fig. S4.8. The first three feasible values of  $\alpha$  (3-5%) are the only exception to this, where  $z$  plateaus to a maximum value constrained by the empirical genetic drift between Mbuti and non-Africans.

**Figure S4.8:** As the proportion of Basal Eurasian ancestry  $\alpha$  decreases, it is derived from an ever more distant split as measured by the genetic drift  $z$  (Fig. S4.5). The plot for Iran\_N is shown.

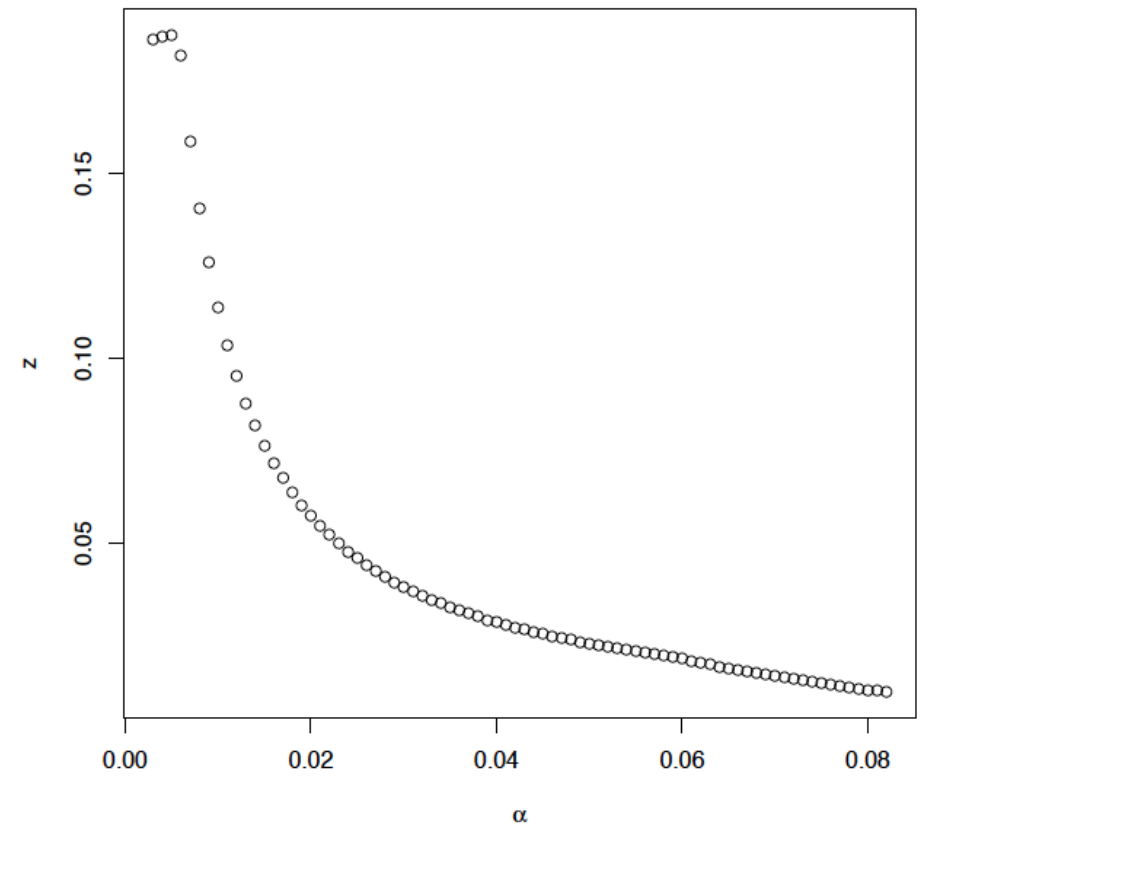

### Adding Mota as an additional constraint

Fig. S4.8 suggests a way in which the proportion of Basal Eurasian can be constrained. We can find a population that is phylogenetically closer (than the Mbuti) to non-African populations, thus reducing the allowable range of  $z$  and placing a more stringent lower bound on  $\alpha$ .

As a proof of concept, we add Mota<sup>10</sup>, a ~4,500 year old male from the Ethiopian highlands as an additional constraint (Fig. S4.9). This model fits, and the Out-of-Africa bottleneck drift  $RR \rightarrow \text{non\_African}$  becomes 0.083.

**Figure S4.9: Adding Mota as an additional constraint to the model of Fig. S4.6**

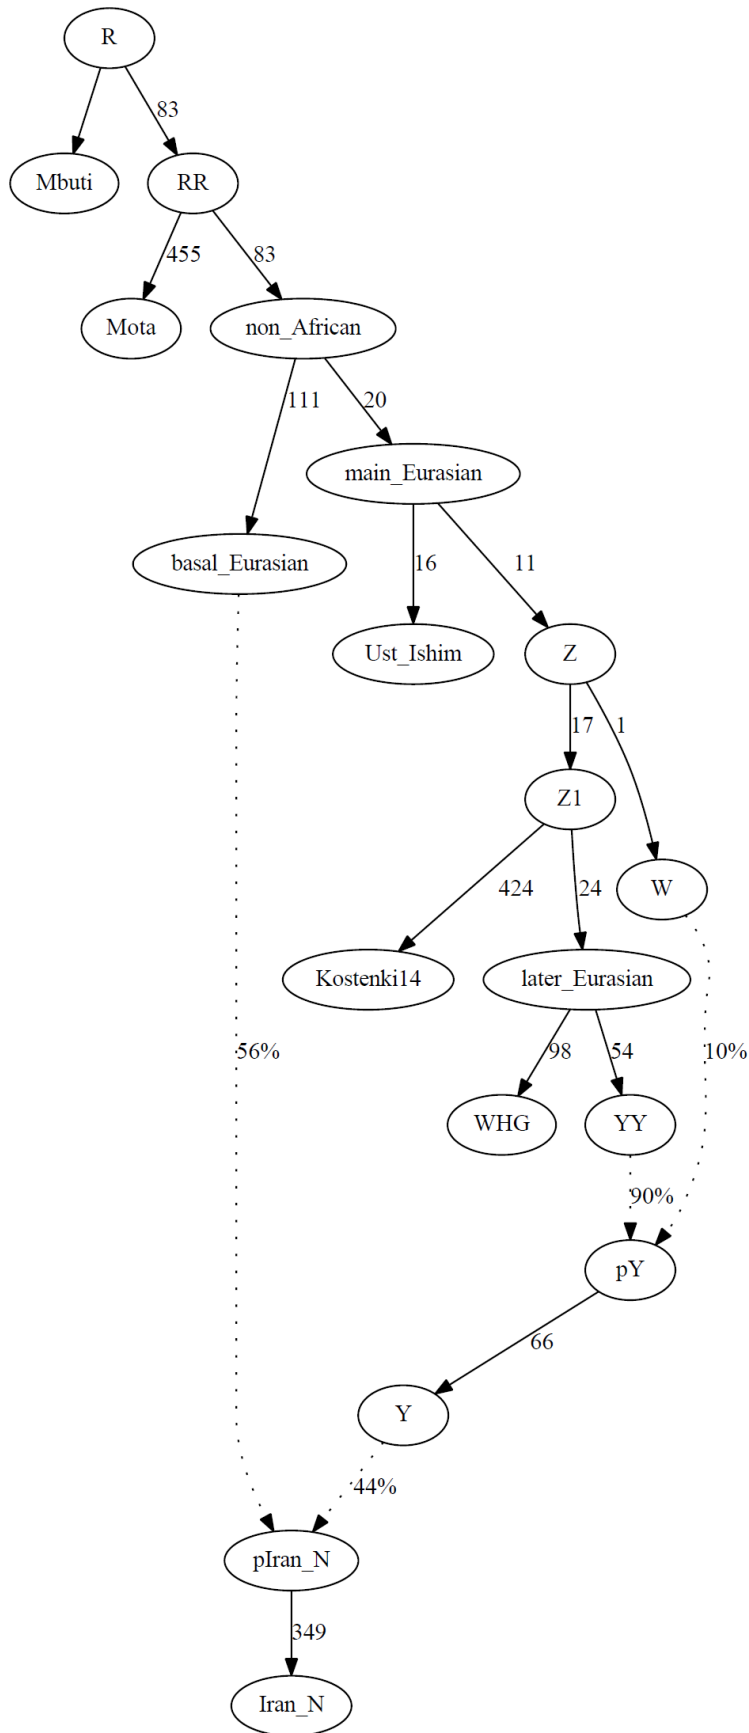



We next vary  $\alpha$  in the  $[0,1]$  interval as before and show in Fig. S4.9 the Z-score of the worst  $f$ -statistic outlier. The feasible range is reduced from  $[3, 82]$  (Fig. S4.7) to  $[6, 82]$ .

**Figure S4.9: Worst  $f$ -statistic outlier Z-score for different amount of Basal Eurasian proportion  $\alpha$  of the model of Fig. S4.8.**

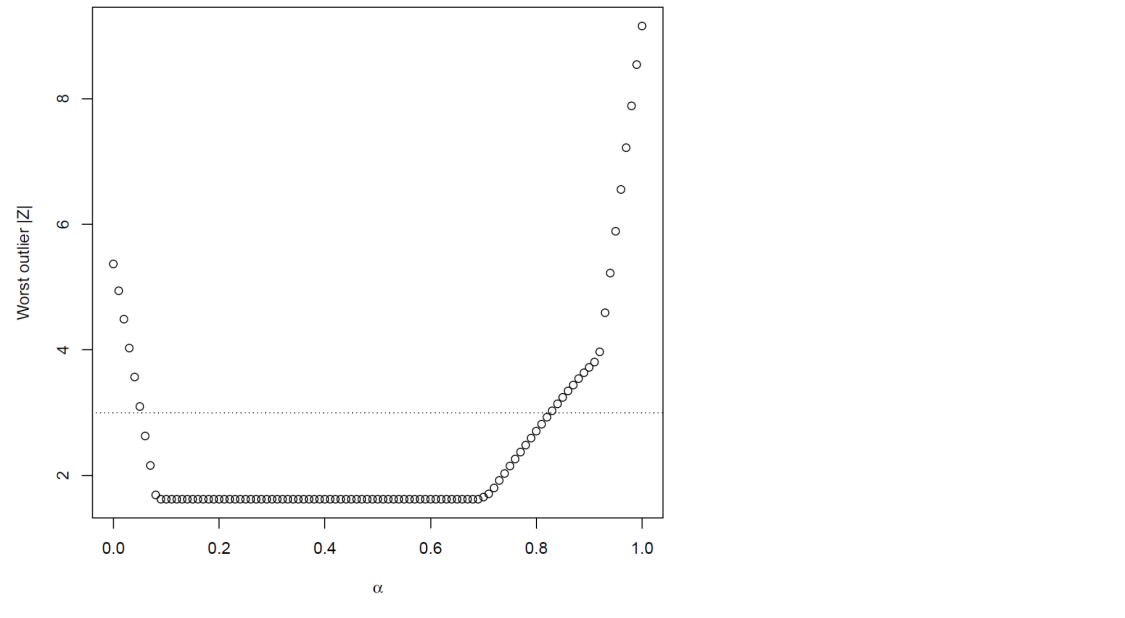

In Table S4.7 we list the feasible range of Basal Eurasian ancestry for the model structure of Fig. S4.8. Three populations did not have a feasible range according to the  $|Z| < 3$  criterion (Iberia\_BA:  $|Z|=3.1$ , Steppe\_EMBA:  $|Z|=3.2$ , Steppe\_MLBA:  $|Z|=3.3$ ).

**Table S4.7: Feasible ranges of Basal Eurasian admixture for different populations (with Mota constraint).**

| <b>Test</b>  | <b>Min</b> | <b>Max</b> |
|--------------|------------|------------|
| Anatolia_N   | 5          | 48         |
| Armenia_ChL  | 4          | 52         |
| Armenia_EBA  | 5          | 58         |
| Armenia_MLBA | 5          | 64         |
| CHG          | 3          | 68         |
| EHG          | 0          | 40         |
| Europe_EN    | 5          | 46         |
| Europe_LNBA  | 4          | 45         |
| Europe_MNChL | 4          | 42         |
| Iran_ChL     | 8          | 61         |
| Iran_LN      | 6          | 88         |
| Iran_HotulIb | 0          | 97         |
| Iran_N       | 6          | 82         |
| Iran_recent  | 5          | 62         |
| Levant_BA    | 8          | 56         |

|                   |    |    |
|-------------------|----|----|
| Levant_N          | 10 | 55 |
| MA1               | 0  | 52 |
| Natufian          | 9  | 68 |
| SHG               | 0  | 33 |
| Steppe_Eneolithic | 1  | 49 |
| Steppe_IA         | 1  | 46 |
| Switzerland_HG    | 0  | 27 |

MA1, EHG, SHG, Switzerland\_HG are consistent with having no Basal Eurasian ancestry, while at least some such ancestry is inferred for the remaining populations.

**Neolithic Iran and Natufians could be derived from the same Basal Eurasian population but are genetically closer to EHG and WHG respectively**

We take the model of Fig. S4.9 and attempt to fit Natufians as a mixture of the same Basal Eurasian population that contributes to Iran\_N and any other population of the tree. Several solutions are feasible, and we show the best one (lowest ADMIXTUREGRAPH score) in Fig. S4.10. We can add both EHG and MA1 as simple branches to the model structure of Fig. S4.10 and show the results in Fig. S4.11. An interesting aspect of this model is that it derives both Natufians and Iran\_N from Basal Eurasians but Natufians have ancestry from a population related to WHG, while Iran\_N has ancestry related to EHG. Natufians and Iran\_N may themselves reside on clines of WHG-related/EHG-related admixture. The fact that these two populations are differentially related to European hunter-gatherers can be directly seen from the following statistics:

| X   | Y     | $f_4(\text{Iran}_N, \text{Natufian}; X, Y)$ | Z    |
|-----|-------|---------------------------------------------|------|
| EHG | Mbuti | 0.00204                                     | 3.4  |
| WHG | Mbuti | -0.00241                                    | -4.3 |
| WHG | EHG   | -0.00441                                    | -8.9 |

The statistic  $f_4(\text{Iran}_N, \text{Iran\_HotuIIIb}; \text{EHG}, \text{Mbuti}) = -0.00199$  ( $Z=-2.4$ ) suggests that the singleton individual from Hotu (Iran\_HotuIIIb) was shifted towards EHG along the Iran\_N/EHG cline, albeit it does not reach  $|Z|>3$ . There is uncertainty about the date of Iran\_HotuIIIb, as it is not certain that it is of Mesolithic age and thus predates the Neolithic of Iran from Ganj Dareh. The fact that the Caucasus hunter-gatherers (CHG) (who are definitely pre-Neolithic) have extra EHG-related ancestry is also supportive of a substantial antiquity of this element in the Caucasus-Iran region. It is not clear whether the hunter-gatherers preceding the Neolithic in Ganj Dareh were similar to Iran\_HotuIIIb or the CHG and their EHG affinity was diluted during Neolithization, or whether they are descended from an unsampled hunter-gatherer population that already had this reduced affinity to the EHG.

**Figure S4.10: Co-modelling Iran\_N and Natufians as a mixture of the same Basal Eurasian population.**

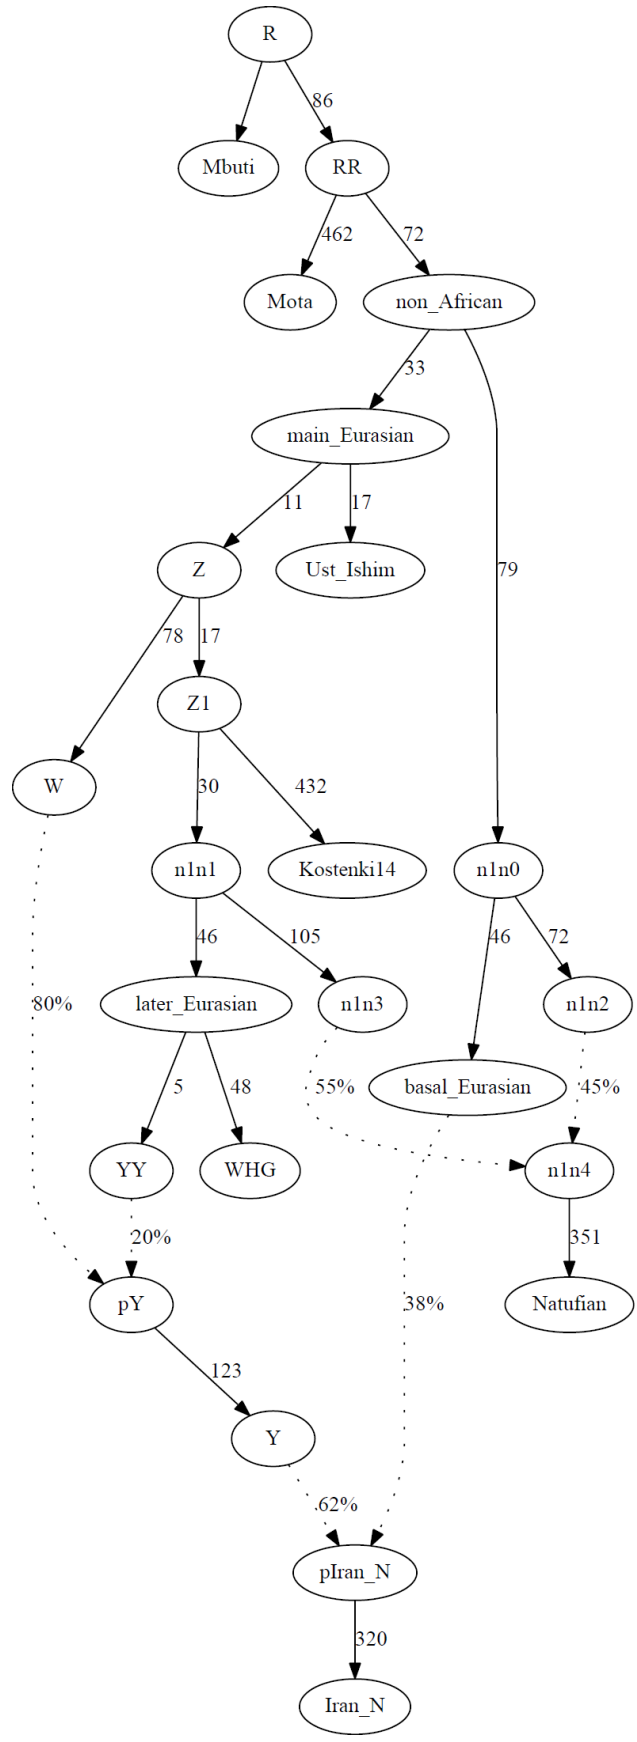

**Figure S4.11: A model of western Eurasian history that incorporates Upper Paleolithic Eurasians (Ust\_Ishim, Kostenki14, MA1) and the four most genetically differentiated Holocene populations (Natufians, Iran\_N, WHG, EHG).**

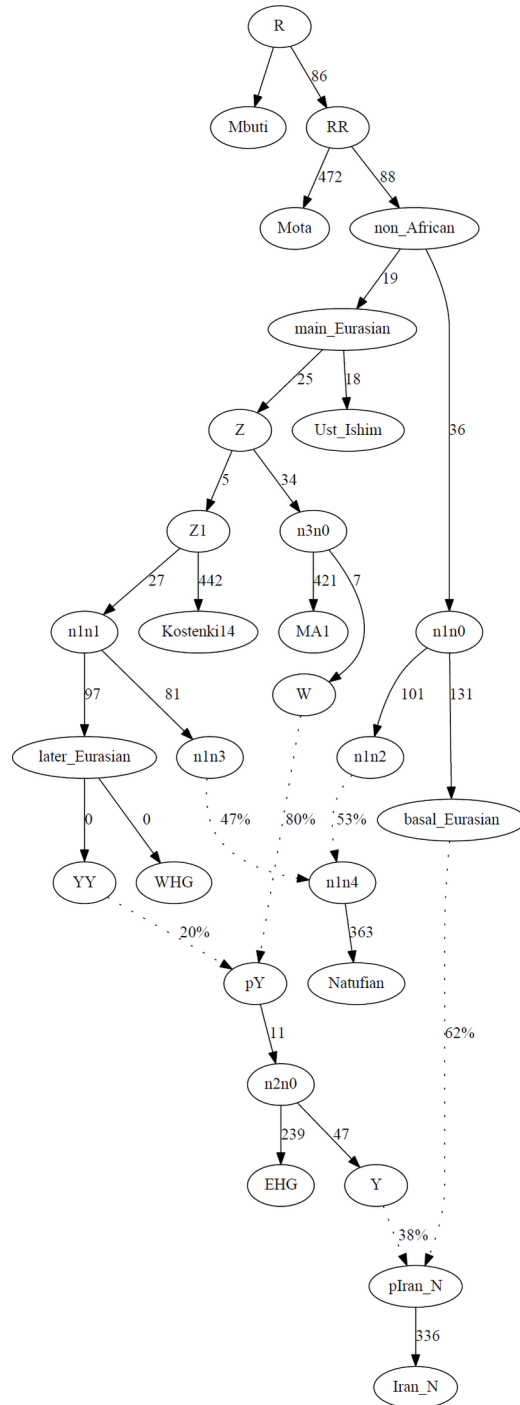

### Estimating Basal Eurasian ancestry without an explicit model

An elegant solution to the problem of estimating  $\alpha$  is not to model the phylogeny of diverse Eurasian populations directly, but rather to use the “qpAdm” methodology described in Supplementary Information, section 10 of ref. 7 to obtain mixture proportions without an explicit phylogeny. A schematic representation of this approach is seen in Fig. S4.12. We model the *Test* population as a mixture of a West Eurasian population with an African Outgroup. The qpAdm methodology also provides a formal test of whether the model of the *Test* population as a mixture of two source streams that are clades with West Eurasians and Africans – with all analyzed outgroups phylogenetically more distant – is a fit to the data.

**Figure S4.12: Modeling Basal Eurasian admixture without an explicit phylogeny**

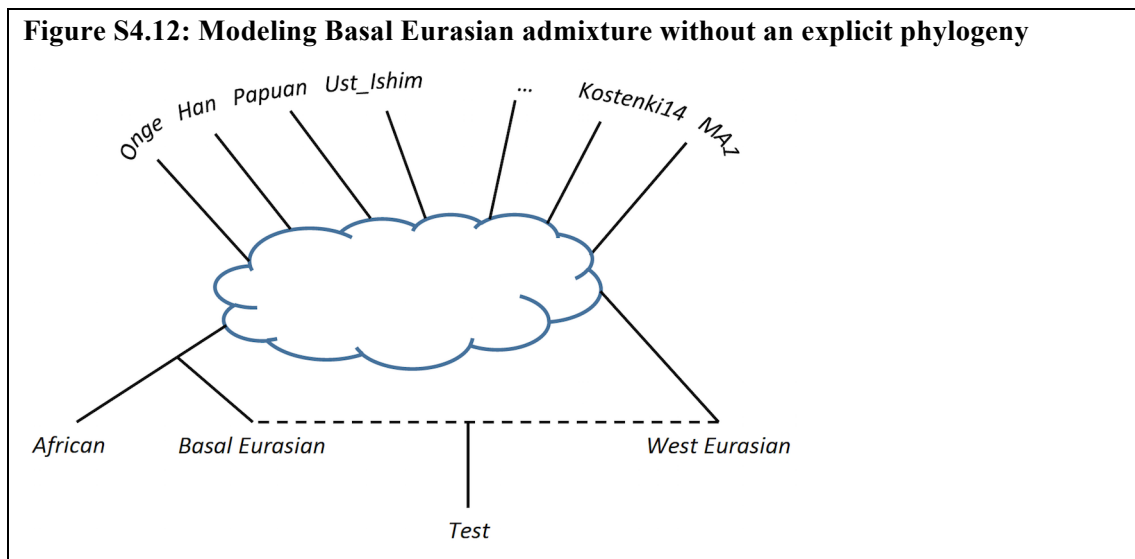

We use the set of 6 outgroups shown in Fig. S4.12. This includes diverse eastern non-African populations (Onge from the Andaman Islands, Han from China, Papuans from New Guinea) and Upper Paleolithic Eurasians (Ust\_Ishim<sup>4</sup>, Kostenki14<sup>6</sup>, MA1<sup>3</sup>). Modeling the relationships between all these populations is difficult and there are no ancient genomes from eastern Eurasia or Oceania that could constrain such models. Nonetheless, these populations are differentially related to ancient West Eurasian populations (Table S4.1) and thus potentially informative. We test three sets of populations for being derived from two streams of ancestry relative to the outgroups:

(*Test*, Mota, WHG)

(*Test*, Mota, EHG)

(*Test*, Mota, WHG, EHG)

The qpAdm method gives us both a P-value for whether the matrix is rank=1 or rank=2 (which if  $P > 0.05$  is consistent with two or three streams of ancestry respectively), and an estimate of the proportion  $\alpha$  of ancestry that is a clade with Mota (that is, proportion of Basal Eurasian ancestry). Table S4.8 summarizes our results.

**Table S4.8: Estimates of Basal Eurasian admixture with qpAdm methodology.** The set of outgroups is (Ust\_Ishim, Kostenki14, MA1, Han, Onge, Papuan). The sets of populations that are tested for being consistent with two streams of ancestry related to the outgroups are (*Test*, Mota, WHG), (*Test*, Mota, EHG), and with three streams of ancestry (*Test*, Mota, WHG, EHG). We highlight in red cases in which the P-value for rank=1 or rank=2 is >0.05, indicating that we cannot reject the model of descent from two or three streams of ancestry. The inferred mixture proportion  $\alpha$  and its standard error are also presented.

| <i>Test</i>       | <i>West Eurasian population(s) included among the references</i> |          |       |          |          |       |          |          |       |
|-------------------|------------------------------------------------------------------|----------|-------|----------|----------|-------|----------|----------|-------|
|                   | WHG                                                              |          |       | EHG      |          |       | WHG+EHG  |          |       |
|                   | P-value                                                          | $\alpha$ | s.e.  | P-value  | $\alpha$ | s.e.  | P-value  | $\alpha$ | s.e.  |
| Anatolia_ChL      | 7.62E-03                                                         | 0.167    | 0.057 | 8.98E-08 | 0.451    | 0.044 | 1.60E-02 | 0.213    | 0.061 |
| Anatolia_N        | 8.18E-02                                                         | 0.295    | 0.032 | 2.82E-18 | 0.566    | 0.030 | 4.67E-02 | 0.305    | 0.036 |
| Armenia_ChL       | 3.06E-06                                                         | 0.193    | 0.044 | 8.18E-07 | 0.458    | 0.030 | 3.32E-01 | 0.295    | 0.037 |
| Armenia_EBA       | 9.10E-07                                                         | 0.279    | 0.045 | 2.68E-06 | 0.513    | 0.031 | 1.01E-03 | 0.377    | 0.047 |
| Armenia_MLBA      | 9.51E-15                                                         | 0.267    | 0.066 | 5.89E-04 | 0.486    | 0.030 | 1.27E-03 | 0.420    | 0.045 |
| CHG               | 2.10E-04                                                         | 0.336    | 0.050 | 1.02E-03 | 0.532    | 0.034 | 6.91E-02 | 0.415    | 0.047 |
| Europe_EN         | 2.06E-02                                                         | 0.291    | 0.032 | 1.71E-17 | 0.570    | 0.029 | 1.13E-02 | 0.303    | 0.037 |
| Europe_LNBA       | 5.21E-19                                                         | 0.060    | 0.043 | 8.82E-08 | 0.387    | 0.024 | 1.26E-02 | 0.258    | 0.029 |
| Europe_MNChL      | 5.35E-02                                                         | 0.230    | 0.031 | 7.16E-21 | 0.524    | 0.032 | 6.95E-02 | 0.252    | 0.033 |
| Iberia_BA         | 2.06E-02                                                         | 0.116    | 0.069 | 1.17E-04 | 0.396    | 0.050 | 1.70E-01 | 0.189    | 0.067 |
| Iran_ChL          | 1.96E-07                                                         | 0.332    | 0.047 | 9.97E-06 | 0.540    | 0.030 | 2.14E-03 | 0.421    | 0.043 |
| Iran_LN           | 4.37E-02                                                         | 0.509    | 0.065 | 5.48E-02 | 0.671    | 0.044 | 1.42E-01 | 0.562    | 0.070 |
| Iran_HotuIIIb     | 4.90E-02                                                         | 0.646    | 0.108 | 6.44E-01 | 0.683    | 0.067 | 4.75E-01 | 0.684    | 0.098 |
| Iran_N            | 1.53E-02                                                         | 0.517    | 0.051 | 5.48E-02 | 0.648    | 0.036 | 2.45E-01 | 0.561    | 0.051 |
| Iran_recent       | 5.10E-05                                                         | 0.363    | 0.060 | 2.47E-04 | 0.552    | 0.041 | 1.11E-03 | 0.443    | 0.065 |
| Levant_BA         | 1.62E-01                                                         | 0.344    | 0.042 | 1.33E-08 | 0.584    | 0.033 | 2.31E-01 | 0.370    | 0.044 |
| Levant_N          | 9.52E-02                                                         | 0.334    | 0.043 | 5.38E-12 | 0.598    | 0.036 | 4.82E-02 | 0.334    | 0.048 |
| Natufian          | 3.33E-01                                                         | 0.399    | 0.054 | 1.34E-06 | 0.627    | 0.048 | 2.53E-01 | 0.384    | 0.058 |
| SHG               | 2.27E-17                                                         | -0.210   | 0.059 | 2.11E-08 | 0.203    | 0.031 | 2.47E-01 | 0.051    | 0.033 |
| Steppe_EMBA       | 1.57E-33                                                         | -0.208   | 0.077 | 3.32E-01 | 0.269    | 0.023 | 3.84E-01 | 0.239    | 0.032 |
| Steppe_Eneolithic | 2.83E-26                                                         | -0.327   | 0.092 | 8.04E-01 | 0.144    | 0.034 | 7.52E-01 | 0.163    | 0.047 |
| Steppe_IA         | 3.94E-18                                                         | 0.073    | 0.080 | 5.23E-07 | 0.339    | 0.040 | 1.55E-07 | 0.314    | 0.068 |
| Steppe_MLBA       | 4.83E-23                                                         | -0.021   | 0.054 | 1.85E-05 | 0.340    | 0.024 | 1.71E-02 | 0.239    | 0.031 |
| Switzerland_HG    | 2.49E-01                                                         | -0.009   | 0.051 | 1.25E-20 | 0.410    | 0.049 | 3.20E-01 | -0.028   | 0.054 |

Disjoint sets of populations can be modeled as WHG+Mota or EHG+Mota mixtures. For WHG+Mota, the populations that can be modeled adequately are from the Levant, Anatolia, and Neolithic Europe. For EHG+Mota, the populations that can be modeled adequately are from Iran and the Eurasian steppe down to the Early/Middle Bronze Age (Steppe\_EMBA) populations. The EHG+Mota modeling is adequate in the steppe continuing through the time of the Poltavka culture of the Middle Bronze Age<sup>11</sup>, since as we show in Supplementary Information section 7, the Near Eastern migration into the steppe from Iran-related populations. The ~14,000 year old Upper Paleolithic hunter-gatherer from Switzerland<sup>12</sup> can also be modeled as WHG+Mota, but has no significant evidence of Basal Eurasian ancestry ( $\alpha=-0.9\pm 5.1\%$ ), consistent with its close relationship to WHG<sup>12</sup> (Fig. 1b). Scandinavian hunter-gatherers (SHG) from Motala<sup>1,7,11</sup> are an example of a population that cannot be modeled as either WHG+Mota ( $p=2.27E-17$ ), or EHG+Mota ( $p=2.11E-08$ ), but can be modeled as WHG+EHG+Mota ( $p=0.247$ ). This population has both WHG and EHG ancestry<sup>7</sup>. By using both WHG and EHG as source populations, we are able to model it, and infer that its Basal Eurasian ancestry is  $5.1\pm 3.3\%$  which is not significantly different than zero.

Several populations cannot be modeled even as WHG+EHG+Mota mixtures (Table S4.8), suggesting that their relationship to the outgroups may be more complex. By dropping some of the outgroups, we may remove populations that violate the topology of Fig. S4.12, that is, they interact with the Test population not via the reference populations. We can thus obtain an estimate of Basal Eurasian ancestry which is the parameter of interest here. The downside of dropping an outgroup is that we are removing potentially phylogenetic useful branching points within the “cloud” of Fig. S4.12 which provide leverage for inferring mixture proportions. We remove each of the six outgroups in turn and show the results in Table S4.9.

Three populations (Kostenki14, MA1, and Han), when dropped as outgroups, result in the quadruple (Test, WHG, EHG, Mota) being consistent with 3 streams of ancestry for all (or nearly all in the case of Han) Test populations. Removing Kostenki14 results in a blowup of the standard errors suggesting that it carries important phylogenetic information that is not present in the other outgroups. Removal of MA1 and Han suggests interactions between West Eurasia and Upper Paleolithic Siberia and East Asia which we explore in Supplementary Information, section 11. For our purpose of estimating Basal Eurasian ancestry, however (and unlike with Kostenki14), removing MA1 and Han from the set of outgroups does not result in a blowup of standard errors which remain modest (less than 10% for most Test populations). In Fig. 2 we plot graphically the Basal Eurasian estimate results when removing MA1, which results in successful modeling of all Test populations, and is thus the main estimate we use in the study.

**Table S4.9: Estimates of Basal Eurasian ancestry with a single dropped outgroup population.** The analysis here is the same as Table S4.8, with (Test, Mota, WHG, EHG) tested for consistency with being derived from three streams of ancestry (hence the P-value is for rank=2). We drop a single outgroup in each column of the table.

| Test              | Dropped Outgroup |          |       |            |            |           |          |          |       |          |          |       |          |          |       |          |          |       |
|-------------------|------------------|----------|-------|------------|------------|-----------|----------|----------|-------|----------|----------|-------|----------|----------|-------|----------|----------|-------|
|                   | Ust_Ishim        |          |       | Kostenki14 |            |           | MA1      |          |       | Han      |          |       | Papuan   |          |       | Onge     |          |       |
|                   | P-value          | $\alpha$ | s.e.  | P-value    | $\alpha$   | s.e.      | P-value  | $\alpha$ | s.e.  | P-value  | $\alpha$ | s.e.  | P-value  | $\alpha$ | s.e.  | P-value  | $\alpha$ | s.e.  |
| Anatolia_ChL      | 6.08E-03         | 0.199    | 0.062 | 6.23E-01   | 1.051      | 2.212     | 7.08E-01 | 0.084    | 0.072 | 9.43E-01 | 0.228    | 0.055 | 1.26E-02 | 0.243    | 0.065 | 1.28E-02 | 0.229    | 0.061 |
| Anatolia_N        | 2.27E-02         | 0.298    | 0.035 | 5.08E-01   | 0.134      | 0.619     | 2.52E-01 | 0.253    | 0.039 | 5.26E-01 | 0.309    | 0.034 | 1.30E-01 | 0.333    | 0.037 | 2.31E-02 | 0.309    | 0.036 |
| Armenia_ChL       | 2.13E-01         | 0.295    | 0.037 | 4.53E-01   | 0.335      | 0.711     | 8.17E-01 | 0.248    | 0.045 | 8.49E-01 | 0.294    | 0.035 | 3.14E-01 | 0.309    | 0.039 | 1.99E-01 | 0.298    | 0.037 |
| Armenia_EBA       | 5.40E-04         | 0.388    | 0.045 | 4.67E-01   | 0.859      | 1.832     | 5.88E-01 | 0.276    | 0.052 | 4.22E-01 | 0.375    | 0.041 | 4.83E-03 | 0.413    | 0.047 | 3.76E-04 | 0.380    | 0.047 |
| Armenia_MLBA      | 1.22E-03         | 0.399    | 0.043 | 1.96E-01   | 105.830    | 26.253    | 2.73E-01 | 0.305    | 0.055 | 7.69E-02 | 0.410    | 0.040 | 3.46E-02 | 0.464    | 0.045 | 4.10E-04 | 0.417    | 0.045 |
| CHG               | 1.67E-02         | 0.417    | 0.049 | 5.31E-01   | 0.212      | 0.832     | 2.63E-01 | 0.347    | 0.058 | 3.47E-01 | 0.414    | 0.046 | 3.56E-01 | 0.456    | 0.049 | 3.00E-02 | 0.417    | 0.048 |
| Europe_EN         | 7.80E-03         | 0.306    | 0.036 | 3.48E-01   | 0.605      | 1.149     | 5.77E-01 | 0.239    | 0.038 | 6.59E-01 | 0.312    | 0.034 | 2.12E-02 | 0.328    | 0.038 | 5.23E-03 | 0.309    | 0.038 |
| Europe_LNBA       | 1.44E-02         | 0.256    | 0.028 | 2.57E-01   | 1.473      | 1.418     | 7.60E-01 | 0.201    | 0.034 | 5.81E-01 | 0.256    | 0.026 | 2.36E-02 | 0.277    | 0.030 | 5.22E-03 | 0.260    | 0.029 |
| Europe_MNChL      | 2.24E-02         | 0.252    | 0.033 | 3.88E-01   | 0.410      | 0.733     | 3.85E-01 | 0.210    | 0.035 | 8.66E-01 | 0.260    | 0.031 | 6.89E-02 | 0.268    | 0.034 | 6.76E-02 | 0.261    | 0.033 |
| Iberia_BA         | 1.08E-01         | 0.161    | 0.067 | 5.57E-01   | 0.019      | 0.659     | 1.20E-01 | 0.162    | 0.074 | 1.70E-01 | 0.192    | 0.065 | 9.27E-01 | 0.229    | 0.065 | 9.07E-02 | 0.182    | 0.068 |
| Iran_ChL          | 2.45E-03         | 0.431    | 0.042 | 1.91E-01   | 3.053      | 2.780     | 4.94E-01 | 0.317    | 0.051 | 1.02E-01 | 0.418    | 0.040 | 1.16E-02 | 0.451    | 0.044 | 6.78E-04 | 0.419    | 0.044 |
| Iran_LN           | 1.56E-01         | 0.563    | 0.069 | 4.99E-01   | 0.916      | 1.276     | 9.31E-01 | 0.460    | 0.079 | 8.82E-01 | 0.567    | 0.065 | 1.20E-01 | 0.586    | 0.073 | 8.25E-02 | 0.574    | 0.072 |
| Iran_HotulIb      | 3.63E-01         | 0.644    | 0.093 | 5.43E-01   | -5.670     | 3.727     | 3.00E-01 | 0.665    | 0.125 | 3.09E-01 | 0.686    | 0.098 | 3.16E-01 | 0.698    | 0.106 | 7.84E-01 | 0.661    | 0.095 |
| Iran_N            | 1.61E-01         | 0.577    | 0.052 | 2.33E-01   | -378.404   | 674.748   | 9.27E-01 | 0.482    | 0.063 | 7.48E-01 | 0.559    | 0.050 | 1.37E-01 | 0.571    | 0.056 | 1.59E-01 | 0.568    | 0.052 |
| Iran_recent       | 4.77E-02         | 0.450    | 0.057 | 4.33E-01   | -86130.138 | 32292.937 | 2.32E-01 | 0.308    | 0.070 | 1.28E-02 | 0.432    | 0.061 | 1.07E-03 | 0.477    | 0.070 | 4.80E-04 | 0.436    | 0.064 |
| Levant_BA         | 1.53E-01         | 0.368    | 0.044 | 4.01E-01   | 0.327      | 0.601     | 8.99E-01 | 0.313    | 0.049 | 8.18E-01 | 0.373    | 0.042 | 2.11E-01 | 0.389    | 0.047 | 1.23E-01 | 0.373    | 0.044 |
| Levant_N          | 1.28E-02         | 0.326    | 0.049 | 4.39E-01   | 0.967      | 1.304     | 2.17E-01 | 0.277    | 0.050 | 6.46E-01 | 0.349    | 0.044 | 2.84E-02 | 0.353    | 0.052 | 1.40E-01 | 0.355    | 0.048 |
| Natufian          | 5.87E-01         | 0.382    | 0.058 | 2.42E-01   | 0.997      | 0.788     | 3.91E-01 | 0.448    | 0.077 | 1.73E-01 | 0.385    | 0.058 | 1.64E-01 | 0.368    | 0.063 | 1.89E-01 | 0.393    | 0.059 |
| SHG               | 2.01E-01         | 0.034    | 0.034 | 3.56E-01   | -0.408     | 0.829     | 8.09E-01 | 0.097    | 0.039 | 4.72E-01 | 0.052    | 0.033 | 2.29E-01 | 0.038    | 0.035 | 1.29E-01 | 0.052    | 0.033 |
| Steppe_EMBA       | 2.79E-01         | 0.235    | 0.032 | 3.33E-01   | 2.632      | 1.048     | 3.62E-01 | 0.216    | 0.042 | 2.56E-01 | 0.238    | 0.031 | 6.10E-01 | 0.254    | 0.033 | 4.24E-01 | 0.234    | 0.031 |
| Steppe_Eneolithic | 5.45E-01         | 0.146    | 0.047 | 9.55E-01   | 0.226      | 0.466     | 5.54E-01 | 0.171    | 0.061 | 5.99E-01 | 0.164    | 0.047 | 8.84E-01 | 0.145    | 0.049 | 5.48E-01 | 0.163    | 0.047 |
| Steppe_IA         | 6.59E-06         | 0.329    | 0.062 | 2.58E-01   | -7656.969  | 23037.913 | 8.96E-01 | 0.056    | 0.086 | 9.29E-02 | 0.274    | 0.055 | 6.83E-08 | 0.343    | 0.078 | 1.47E-07 | 0.322    | 0.068 |
| Steppe_MLBA       | 1.77E-02         | 0.235    | 0.031 | 3.09E-01   | 0.453      | 0.986     | 2.54E-01 | 0.182    | 0.040 | 7.65E-02 | 0.237    | 0.030 | 1.20E-01 | 0.265    | 0.031 | 8.96E-03 | 0.236    | 0.031 |
| Switzerland_HG    | 6.00E-01         | -0.042   | 0.052 | 3.33E-01   | 1.171      | 1.396     | 4.26E-01 | 0.023    | 0.068 | 2.35E-01 | -0.028   | 0.053 | 1.88E-01 | -0.036   | 0.058 | 2.14E-01 | -0.022   | 0.054 |



### Basal Eurasian ancestry could stem from a single Out-of-Africa population

We have previously shown by ADMIXTUREGRAPH modeling (Fig. S4.10) that Natufians and Iran\_N could derive their ancestry from the same Out-of-Africa Basal Eurasian population. Our method for inferring mixture proportions of Basal Eurasian ancestry without an explicit model (Fig. S4.12) relies on the fact that Basal Eurasians and an African reference (Mota) are both basal to other non-Africans and thus we can estimate mixture proportions of Basal Eurasian ancestry indirectly, using Mota as a reference population. However, this has the drawback that it estimates ancestry from any population that holds the same phylogenetic position and thus mixture proportions for the different tested populations (Table S4.9) do not necessarily reflect ancestry from a concrete ‘Basal Eurasian’ population, but (potentially) an aggregate of diverse kinds of ancestry with the common property that they derive from populations that split off prior to the differentiation of other non-Africans.

Populations as diverse as primates, archaic humans, Africans, and ‘Basal Eurasians’ all occupy a basal phylogenetic position to non-Africans and we would like some assurance that our estimates of ‘Basal Eurasian’ ancestry are not conflated by these other kinds of ancestry.

We can investigate this possibility by removing Mota from the set of reference populations and placing it into the right set of outgroups which now becomes: Mota, Ust\_Ishim, Kostenki14, Han, Papuan, Onge. By doing so, we gain access to the phylogenetic branch Mota→Ust\_Ishim, i.e., a branch that includes a sub-Saharan African population from East Africa and an ‘undifferentiated’ non-African population that is equally related to European hunter-gatherers and eastern non-Africans<sup>4</sup>. Two populations basal to non-Africans like Ust\_Ishim may occupy the following phylogenetic positions vis a vis Mota, Ust\_Ishim, and another *Non-Basal* population (Fig. S4.13).

**Figure S4.13: Possible phylogenetic positions of two populations in relation to Ust\_Ishim, *Non-Basal*, and Mota.** In the top, *X* and *Y* form a clade vis a vis the other populations; in the bottom, the non-Africans (Ust\_Ishim and *Non-Basal*) share drift length *x* with *Y* but not with *X* or Mota.

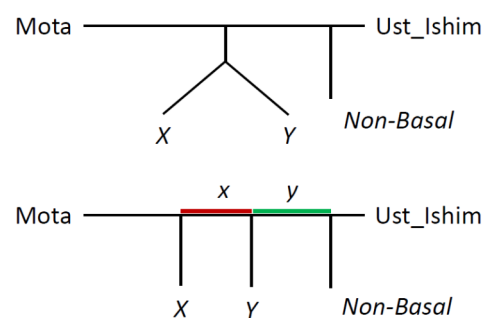

In the top phylogeny of Fig. S4.13, we have  $F_4(X, Y; \text{Mota}, \text{Ust\_Ishim or Non-Basal}) = 0$  and it is thus impossible (using Mota and Ust\_Ishim as outgroups) to determine whether a population has ancestry from  $X$  or  $Y$ . These  $X$  and  $Y$  are descended from one stream of ancestry vis a vis (Mota, Ust\_Ishim, Non-Basal). By contrast, in the bottom phylogeny of Fig. S4.13 we have  $F_4(X, Y; \text{Mota}, \text{Ust\_Ishim}) = x > 0$  and  $X$  and  $Y$  are descended from two streams of ancestry vis a vis (Mota, Ust\_Ishim, Non-Basal). Note that if Mota had not been introduced as an outgroup, the phylogenetic position of  $X$  and  $Y$  vis a vis the remaining outgroups (Ust\_Ishim and Non-Basal) in the top and bottom phylogenies of Fig. S4.13 is equivalent.

We first set the Left set (WHG, EHG) and show that we reject rank=0 ( $p = 1.06e-14$ ). We next use the Left set (Natufian, WHG, EHG) and show that we reject rank=1 ( $p = 2.63e-11$ ), hence Natufians have a type of ancestry that is different from what is found in the European hunter-gatherers WHG and EHG. Next, we use the Left set (*Test*, Natufian, WHG, EHG) for a variety of other *Test* populations and show the results in Table S4.10. If *Test* has yet another type of ancestry that is different from what is found in (Natufian, WHG, EHG) then by introducing *Test* to the Left set we will increase the rank.

However, for nearly all ancient populations (except for MA1 who interacts with Han in the set of outgroups; see Supplementary Information, section 11), rank=2 is not rejected, and hence each *Test* population does not have evidence for any type of ancestry other than what is found in the Natufians. This is supportive of the idea that the Basal Eurasian ancestry in the earliest population of the Levant (Natufians) and in virtually all other ancient West Eurasians (including ancient Iran) is from the same population. Note that the method can clearly reject rank=2 for other types of ancestry ‘basal’ to Eurasians, including Chimp, archaic humans (Altai and Denisovan), and Sub-Saharan Africans.

We should caution that our inability to reject different types of ancestry in Natufians and other ancient West Eurasian populations does not in itself prove that the Basal Eurasians were a single distinct population. For example, if there were multiple layers of Basal Eurasians with vanishingly small  $x$  (Fig. S4.13), then these would be effectively symmetrically related to the outgroups (the bottom case of Fig. S4.13 tends to the top one as  $x \rightarrow 0$ ). Further advances in ancient DNA technology may allow future studies to study Upper and Middle Paleolithic populations directly and test whether early populations from the Levant such as the Skhul/Qafzeh hominins<sup>13</sup> and the makers of Middle Paleolithic stone industries from Arabia<sup>14,15</sup>, or later ones from the cusp of the Upper Paleolithic transition<sup>16</sup>, could correspond to the Basal Eurasians.

**Table S4.10: Testing for rank=2 using Left=(*Test*, Natufian, WHG, EHG) and Right=(Mota, Ust\_Ishim, Kostenki14, Han, Papuan, Onge) for different *Test* populations.**

| <b>Test</b>       | <b>p-value for rank=2</b> |
|-------------------|---------------------------|
| Ju_hoan_North     | 2.31E-04                  |
| MA1               | 3.32E-04                  |
| Mbuti             | 4.28E-04                  |
| Yoruba            | 4.64E-04                  |
| Dinka             | 8.87E-04                  |
| Chimp             | 3.38E-03                  |
| Denisovan         | 9.85E-03                  |
| Altai             | 2.10E-02                  |
| Levant_N          | 1.24E-01                  |
| Steppe_EMBA       | 1.67E-01                  |
| Iran_recent       | 1.81E-01                  |
| Armenia_MLBA      | 2.13E-01                  |
| Steppe_MLBA       | 2.14E-01                  |
| Iran_HotulIb      | 2.43E-01                  |
| Iran_ChL          | 2.68E-01                  |
| Anatolia_N        | 2.95E-01                  |
| Anatolia_ChL      | 3.04E-01                  |
| Steppe_Eneolithic | 3.26E-01                  |
| CHG               | 3.43E-01                  |
| Iran_LN           | 3.71E-01                  |
| SHG               | 5.50E-01                  |
| Europe_EN         | 5.75E-01                  |
| Switzerland_HG    | 6.21E-01                  |
| Iran_N            | 7.03E-01                  |
| Iberia_BA         | 7.27E-01                  |
| Europe_LNBA       | 7.31E-01                  |
| Armenia_EBA       | 7.73E-01                  |
| Levant_BA         | 7.90E-01                  |
| Europe_MNChL      | 8.15E-01                  |
| Armenia_ChL       | 9.17E-01                  |
| Steppe_IA         | 9.66E-01                  |

## References

1. Lazaridis, I. *et al.* Ancient human genomes suggest three ancestral populations for present-day Europeans. *Nature* **513**, 409-413, (2014).
2. Olalde, I. *et al.* Derived immune and ancestral pigmentation alleles in a 7,000-year-old Mesolithic European. *Nature* **507**, 225-228, (2014).
3. Raghavan, M. *et al.* Upper Palaeolithic Siberian genome reveals dual ancestry of Native Americans. *Nature* **505**, 87-91, (2014).
4. Fu, Q. *et al.* Genome sequence of a 45,000-year-old modern human from western Siberia. *Nature* **514**, 445-449, (2014).
5. Fu, Q. *et al.* An early modern human from Romania with a recent Neanderthal ancestor. *Nature* **524**, 216-219, (2015).
6. Seguin-Orlando, A. *et al.* Genomic structure in Europeans dating back at least 36,200 years. *Science* **346**, 1113-1118, (2014).
7. Haak, W. *et al.* Massive migration from the steppe was a source for Indo-European languages in Europe. *Nature* **522**, 207-211, (2015).
8. Reich, D. *et al.* Genetic history of an archaic hominin group from Denisova Cave in Siberia. *Nature* **468**, 1053-1060, (2010).
9. Patterson, N. *et al.* Ancient admixture in human history. *Genetics* **192**, 1065-1093, (2012).
10. Llorente, M. G. *et al.* Ancient Ethiopian genome reveals extensive Eurasian admixture throughout the African continent. *Science* **350**, 820-822, (2015).
11. Mathieson, I. *et al.* Genome-wide patterns of selection in 230 ancient Eurasians. *Nature* **528**, 499-503, (2015).
12. Jones, E. R. *et al.* Upper Palaeolithic genomes reveal deep roots of modern Eurasians. *Nat. Commun.* **6**, 8912, (2015).
13. Bar-Yosef, O. *The chronology of the Middle Paleolithic of the Levant.* 39-56 (New York: Plenum Press, 1998).
14. Armitage, S. J. *et al.* The southern route “Out of Africa”: evidence for an early expansion of modern humans into Arabia. *Science* **331**, 453-456, (2011).
15. Rose, J. I. *et al.* The Nubian Complex of Dhofar, Oman: an African middle stone age industry in Southern Arabia. *PLoS ONE* **6**, e28239, (2011).
16. Hershkovitz, I. *et al.* Levantine cranium from Manot Cave (Israel) foreshadows the first European modern humans. *Nature* **520**, 216-219, (2015).

## Supplementary Information 5

### Ancient Near Easterners had less Neanderthal ancestry than ancient Europeans

It has been observed that West Eurasians have less Neanderthal admixture than Eastern non-African populations<sup>1</sup>. We wanted to investigate whether this could be due to West Eurasians having ancestry from a source that possessed less Neanderthal ancestry, and so studied statistics of the form  $f_4(\text{Ancient West Eurasian}_1, \text{Ancient West Eurasian}_2; \text{Altai, Chimp})$  and  $f_4(\text{Ancient West Eurasian}_1, \text{Ancient West Eurasian}_2; \text{Altai, Denisovan})$ . The expected value of these statistics is zero if  $(\text{Ancient West Eurasian}_1, \text{Ancient West Eurasian}_2)$  both experienced a shared admixture event with Neanderthals prior to the differentiation and positive if Neanderthal admixture affected Ancient West Eurasian<sub>1</sub> to a greater degree than Ancient West Eurasian<sub>2</sub>.

Significantly positive statistics (Table S5.1) involve an individual from mainland Europe or the Eurasian steppe as Ancient West Eurasian<sub>1</sub> and a Near Eastern population as Ancient West Eurasian<sub>2</sub>. The most convincing evidence is for the populations of Neolithic Iran where both sets of statistics (involving either Chimp or Denisovan) are significantly positive. These statistics suggest that ancient populations from the Near East shared fewer alleles with the Altai Neanderthal than those from Europe (including hunter-gatherers and later populations with European hunter-gatherer admixture).

We also combined ancient European and steppe samples into an “EuropeSteppe” meta-population and ancient Near Eastern samples into an “AncientNearEast” meta-population.

**“EuropeSteppe”:** Anatolia\_N, EHG, Europe\_EN, Europe\_LNBA, Europe\_MNChL, Iberia\_BA, SHG, Steppe\_EMBA, Steppe\_Eneolithic, Steppe\_IA, Steppe\_MLBA, Switzerland\_HG, WHG

**“AncientNearEast”:** Anatolia\_ChL, Armenia\_ChL, Armenia\_EBA, Armenia\_MLBA, CHG, Iran\_ChL, Iran\_LN, Iran\_HotuIIIb, Iran\_N, Iran\_recent, Levant\_BA, Levant\_N, Natufian

(The Anatolian Neolithic and Chalcolithic samples are placed in EuropeSteppe and AncientNearEast respectively based on their overall placement in PCA; Fig. 1b).

To test the robustness of our inference using the high-coverage Altai Neanderthal<sup>1</sup>, we also included additional Neanderthal genomes from Vindija (Vi\_merge) and Mezmaiskaya

(MezE) and report these statistics in Table S5.2. The signal is present for Altai and Vindija<sup>2</sup> ( $3.6 \leq Z \leq 5.7$ ) but not for Mezmaiskaya ( $Z \leq 1.3$ ). The lower number of SNPs in this individual might weaken the signal; another possibility is this sample's provenance in the Caucasus which might interact with the Near East in two ways: first, contamination from present-day Caucasian populations into Mezmaiskaya, or second, Neanderthal admixture into ancient Near Eastern populations from a population more closely related to Mezmaiskaya than to the Neanderthals from Europe and the Altai.

The fact that Near Eastern populations have lower Neanderthal admixture than European ones led us to consider the possibility that Basal Eurasian admixture in the former is diluting their Neanderthal admixture. Indeed, when we plot estimates of Basal Eurasian ancestry (Fig. 2; Supplementary Information, section 4) against the statistic  $f_4(\text{Test}, \text{Mbuti}; \text{Altai}, \text{Denisovan})$  (Fig. S5.1) which measures whether the Altai Neanderthal shares more alleles with a *Test* population than with the Mbuti Africans, we observe a striking negative correlation between the two (Fig. 2), suggesting that this is the case. Thus, allele sharing with Neanderthals is inversely correlated with the amount of Basal Eurasian ancestry. This provides direct evidence relevant to the long-standing question of the lower Neanderthal admixture in West Eurasian populations<sup>3-6</sup>, in favor of the idea that ancient Near Eastern populations had lower Neanderthal admixture than those from Europe and through their later mixtures in the Neolithic diluted this ancestry throughout West Eurasia.

Our finding that at least Natufians had Y-chromosomes of African origin (Supplementary Information, section 6) suggested to us initially that gene flow from Africa (which did not experience Neanderthal admixture) may have contributed Basal Eurasian ancestry into the ancient Near East, although the alternative scenario of this ancestry stemming from earlier Out-of-Africa migrants >100 thousand years ago<sup>7</sup> cannot be rejected. However, Natufians do not have less Neanderthal ancestry (Fig. S5.1) or more Basal Eurasian ancestry (Supplementary Information, section 4) than the Neolithic of Iran, and so do not appear to be exceptional in either respect within the context of the ancient Near East. The presence of Basal Eurasian ancestry not only in the Epipaleolithic Natufians from the Levant, but also of the Upper Paleolithic/Mesolithic of Georgia<sup>8</sup> suggest that while this type of ancestry first appears in Europe with the Early Neolithic<sup>7</sup>, it was already pervasive in the Near East before the advent of the Neolithic. Future studies of human remains from the Near East may determine (i) how much earlier the Basal Eurasians were present there, (ii) whether they represent a population of African origin or one that lived in Eurasia but did not experience the Neanderthal admixture of other Eurasians, and (iii) when the dilution of Neanderthal admixture first took place.

**Table S5.1: Significant statistics ( $|Z| \geq 3$ ) of the form  $f_4(\text{Ancient West Eurasian}_1, \text{Ancient West Eurasian}_2; \text{Altai, Chimp})$  and  $f_4(\text{Ancient West Eurasian}_1, \text{Ancient West Eurasian}_2; \text{Altai, Denisovan})$**

| Ancient West Eurasian1 | Ancient West Eurasian2 | $f_4(\text{Ancient West Eurasian}_1, \text{Ancient West Eurasian}_2, \text{Altai, Chimp})$ | Z   | Number of SNPs | Ancient West Eurasian <sub>1</sub> | Ancient West Eurasian <sub>2</sub> | $f_4(\text{Ancient West Eurasian}_1, \text{Ancient West Eurasian}_2, \text{Altai, Denisovan})$ | Z   | Number of SNPs |
|------------------------|------------------------|--------------------------------------------------------------------------------------------|-----|----------------|------------------------------------|------------------------------------|------------------------------------------------------------------------------------------------|-----|----------------|
| Steppe_MLBA            | Iran_N                 | 0.00123                                                                                    | 5.1 | 764177         | Europe_MNChL                       | Iran_N                             | 0.00077                                                                                        | 3.7 | 794839         |
| Steppe_MLBA            | Iran_ChL               | 0.00071                                                                                    | 4.4 | 900462         | Armenia_MLBA                       | Iran_N                             | 0.00084                                                                                        | 3.6 | 740676         |
| Steppe_MLBA            | Levant_N               | 0.00091                                                                                    | 4.3 | 747971         | WHG                                | Iran_N                             | 0.00083                                                                                        | 3.5 | 794703         |
| Steppe_EMBA            | Iran_N                 | 0.00100                                                                                    | 4.3 | 764161         | Steppe_EMBA                        | Iran_N                             | 0.00064                                                                                        | 3.4 | 794777         |
| Europe_MNChL           | Iran_N                 | 0.00102                                                                                    | 4.2 | 764221         | SHG                                | Iran_N                             | 0.00080                                                                                        | 3.4 | 760506         |
| Europe_LNBA            | Iran_N                 | 0.00099                                                                                    | 4.2 | 764219         | Steppe_MLBA                        | Iran_N                             | 0.00066                                                                                        | 3.4 | 794793         |
| Steppe_Eneolithic      | Iran_N                 | 0.00138                                                                                    | 4.1 | 557406         | Europe_LNBA                        | Iran_N                             | 0.00064                                                                                        | 3.3 | 794838         |
| WHG                    | Iran_N                 | 0.00118                                                                                    | 4.1 | 764094         | EHG                                | Iran_N                             | 0.00083                                                                                        | 3.3 | 752732         |
| Steppe_MLBA            | Armenia_EBA            | 0.00063                                                                                    | 4.0 | 896896         | Armenia_MLBA                       | Iran_ChL                           | 0.00054                                                                                        | 3.2 | 851428         |
| Steppe_MLBA            | Anatolia_N             | 0.00048                                                                                    | 4.0 | 1003388        | Europe_EN                          | Iran_N                             | 0.00063                                                                                        | 3.1 | 794835         |
| Steppe_IA              | Iran_N                 | 0.00137                                                                                    | 4.0 | 652653         | Steppe_IA                          | Iran_N                             | 0.00088                                                                                        | 3.0 | 678032         |
| EHG                    | Iran_N                 | 0.00121                                                                                    | 3.9 | 724059         | Anatolia_N                         | Iran_N                             | 0.00060                                                                                        | 3.0 | 794257         |
| SHG                    | Iran_N                 | 0.00109                                                                                    | 3.8 | 731428         |                                    |                                    |                                                                                                |     |                |
| Steppe_MLBA            | Levant_BA              | 0.00067                                                                                    | 3.7 | 783536         |                                    |                                    |                                                                                                |     |                |
| SHG                    | Iran_ChL               | 0.00078                                                                                    | 3.7 | 851283         |                                    |                                    |                                                                                                |     |                |
| Steppe_MLBA            | CHG                    | 0.00070                                                                                    | 3.6 | 1012914        |                                    |                                    |                                                                                                |     |                |
| Armenia_ChL            | Iran_N                 | 0.00090                                                                                    | 3.6 | 736697         |                                    |                                    |                                                                                                |     |                |
| MA1                    | Iran_N                 | 0.00135                                                                                    | 3.6 | 550418         |                                    |                                    |                                                                                                |     |                |
| Steppe_MLBA            | Iran_recent            | 0.00090                                                                                    | 3.5 | 698462         |                                    |                                    |                                                                                                |     |                |
| Steppe_IA              | Levant_N               | 0.00111                                                                                    | 3.5 | 640122         |                                    |                                    |                                                                                                |     |                |
| Europe_EN              | Iran_N                 | 0.00084                                                                                    | 3.5 | 764216         |                                    |                                    |                                                                                                |     |                |
| Steppe_MLBA            | Europe_EN              | 0.00038                                                                                    | 3.4 | 1013102        |                                    |                                    |                                                                                                |     |                |
| Armenia_MLBA           | Iran_N                 | 0.00095                                                                                    | 3.4 | 711903         |                                    |                                    |                                                                                                |     |                |
| SHG                    | Levant_N               | 0.00089                                                                                    | 3.4 | 717109         |                                    |                                    |                                                                                                |     |                |
| EHG                    | Iran_ChL               | 0.00083                                                                                    | 3.3 | 843055         |                                    |                                    |                                                                                                |     |                |
| Steppe_MLBA            | Iran_LN                | 0.00101                                                                                    | 3.3 | 455766         |                                    |                                    |                                                                                                |     |                |
| MA1                    | Iran_LN                | 0.00159                                                                                    | 3.2 | 330829         |                                    |                                    |                                                                                                |     |                |
| Steppe_Eneolithic      | Levant_N               | 0.00098                                                                                    | 3.2 | 548623         |                                    |                                    |                                                                                                |     |                |
| Europe_MNChL           | Iran_ChL               | 0.00051                                                                                    | 3.2 | 900612         |                                    |                                    |                                                                                                |     |                |
| Europe_LNBA            | Levant_N               | 0.00063                                                                                    | 3.2 | 747994         |                                    |                                    |                                                                                                |     |                |
| Europe_MNChL           | Levant_N               | 0.00062                                                                                    | 3.2 | 748010         |                                    |                                    |                                                                                                |     |                |
| Steppe_EMBA            | Iran_ChL               | 0.00050                                                                                    | 3.2 | 900423         |                                    |                                    |                                                                                                |     |                |
| Europe_LNBA            | Iran_ChL               | 0.00048                                                                                    | 3.2 | 900579         |                                    |                                    |                                                                                                |     |                |
| WHG                    | Levant_N               | 0.00083                                                                                    | 3.1 | 747882         |                                    |                                    |                                                                                                |     |                |
| Anatolia_N             | Iran_N                 | 0.00075                                                                                    | 3.1 | 763665         |                                    |                                    |                                                                                                |     |                |
| WHG                    | Iran_ChL               | 0.00071                                                                                    | 3.1 | 900418         |                                    |                                    |                                                                                                |     |                |
| SHG                    | CHG                    | 0.00074                                                                                    | 3.1 | 921987         |                                    |                                    |                                                                                                |     |                |
| SHG                    | Armenia_EBA            | 0.00065                                                                                    | 3.1 | 850497         |                                    |                                    |                                                                                                |     |                |
| MA1                    | Iran_recent            | 0.00126                                                                                    | 3.1 | 506618         |                                    |                                    |                                                                                                |     |                |
| Iberia_BA              | Iran_N                 | 0.00135                                                                                    | 3.1 | 293154         |                                    |                                    |                                                                                                |     |                |
| Armenia_ChL            | Levant_N               | 0.00068                                                                                    | 3.0 | 723619         |                                    |                                    |                                                                                                |     |                |
| EHG                    | Iran_recent            | 0.00097                                                                                    | 3.0 | 670876         |                                    |                                    |                                                                                                |     |                |

**Table S5.2: Statistics of the form  $f_4(\text{AncientEurope}, \text{AncientNearEast}; \text{Neanderthal}, \text{Outgroup})$ .**

| <i>Neanderthal</i> | <i>Outgroup</i> | $f_4(\text{AncientEurope}, \text{AncientNearEast}; \text{Neanderthal}, \text{Outgroup})$ . | Z   | Number of SNPs |
|--------------------|-----------------|--------------------------------------------------------------------------------------------|-----|----------------|
| All sites          |                 |                                                                                            |     |                |
| Altai              | Chimp           | 0.00037                                                                                    | 4.9 | 1014471        |
| Altai              | Denisovan       | 0.00024                                                                                    | 3.8 | 1054004        |
| MezE               | Chimp           | 0.00026                                                                                    | 1.6 | 111958         |
| MezE               | Denisovan       | 0.00011                                                                                    | 0.8 | 116507         |
| Vi_merge           | Chimp           | 0.00047                                                                                    | 5.6 | 677897         |
| Vi_merge           | Denisovan       | 0.00031                                                                                    | 4.2 | 701178         |
| Transversions      |                 |                                                                                            |     |                |
| Altai              | Chimp           | 0.00021                                                                                    | 1.5 | 189467         |
| Altai              | Denisovan       | 0.00025                                                                                    | 2.2 | 197293         |
| MezE               | Chimp           | 0.00013                                                                                    | 0.3 | 20124          |
| MezE               | Denisovan       | 0.00046                                                                                    | 1.5 | 20995          |
| Vi_merge           | Chimp           | 0.00031                                                                                    | 2.0 | 126395         |
| Vi_merge           | Denisovan       | 0.00039                                                                                    | 2.8 | 130847         |



**Figure S5.1: Symmetry test  $f_4(\text{Test}, \text{Mbuti}; \text{Altai}, \text{Denisovan})$ .** Most ancient West Eurasian and Siberian populations share more alleles with the Altai Neanderthal<sup>1</sup> than with the Denisova individual<sup>4</sup>, consistent with having more ancestry from Neanderthals than the Mbuti. The estimated value and  $\pm 3$  standard errors is indicated.

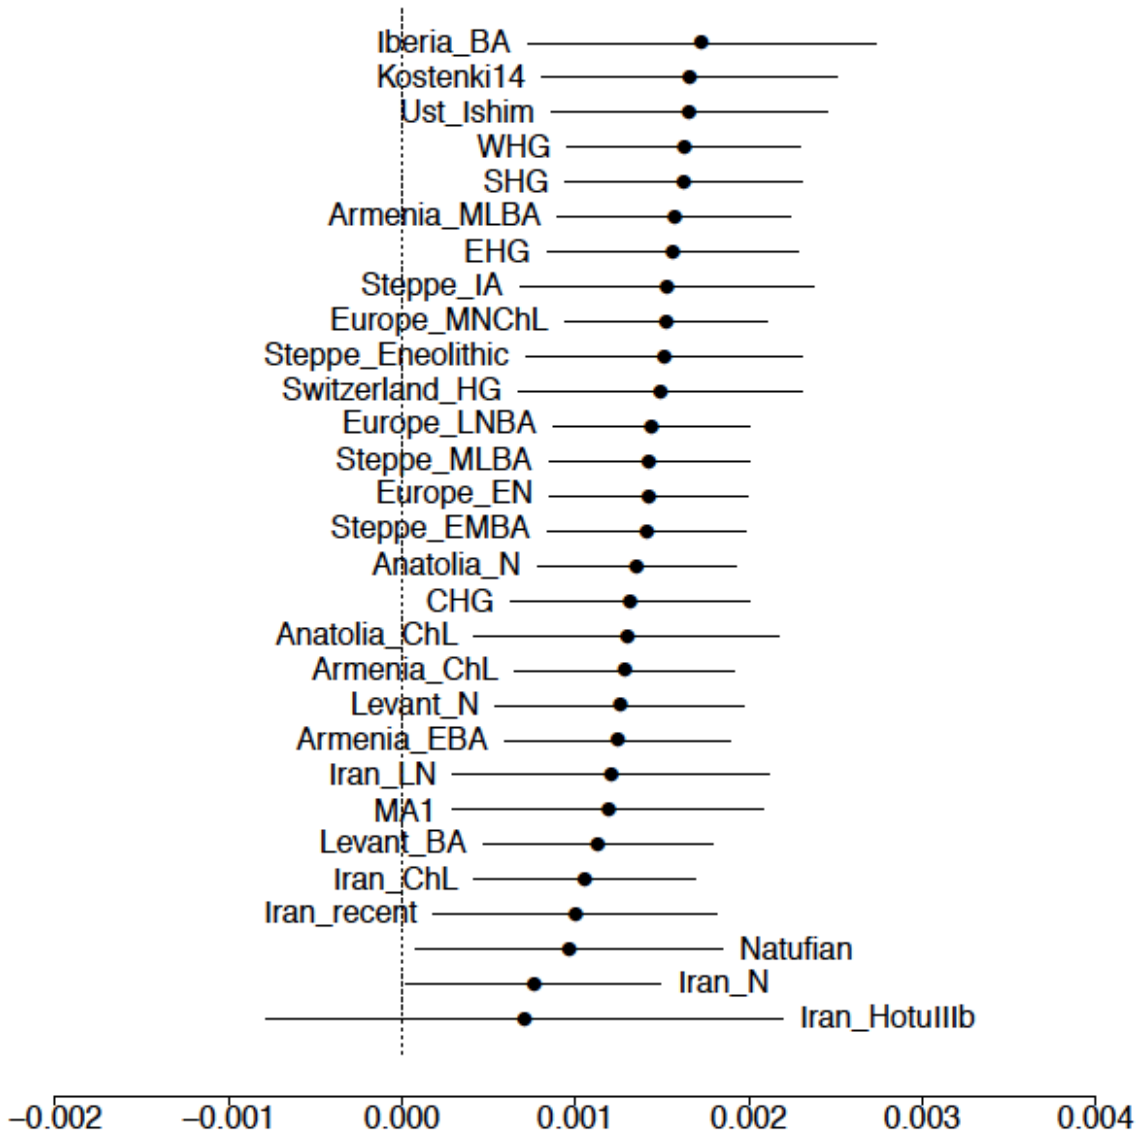

## References

1. Prufer, K. *et al.* The complete genome sequence of a Neanderthal from the Altai Mountains. *Nature* **505**, 43-49, (2014).
2. Green, R. E. *et al.* A Draft Sequence of the Neanderthal Genome. *Science* **328**, 710-722, (2010).
3. Kim, Bernard Y. & Lohmueller, Kirk E. Selection and Reduced Population Size Cannot Explain Higher Amounts of Neanderthal Ancestry in East Asian than in European Human Populations. *The American Journal of Human Genetics* **96**, 454-461, (2015).
4. Meyer, M. *et al.* A High-Coverage Genome Sequence from an Archaic Denisovan Individual. *Science* **338**, 222-226, (2012).
5. Vernot, B. & Akey, Joshua M. Complex History of Admixture between Modern Humans and Neanderthals. *The American Journal of Human Genetics* **96**, 448-453, (2015).
6. Wall, J. D. *et al.* Higher Levels of Neanderthal Ancestry in East Asians Than in Europeans. *Genetics*, (2013).
7. Lazaridis, I. *et al.* Ancient human genomes suggest three ancestral populations for present-day Europeans. *Nature* **513**, 409-413, (2014).
8. Jones, E. R. *et al.* Upper Palaeolithic genomes reveal deep roots of modern Eurasians. *Nat. Commun.* **6**, (2015).

## Supplementary Information 6

### Y-chromosome haplogroup variation in the ancient Near East

To determine the Y-chromosome haplogroup of male individuals, we used the nomenclature of the International Society of Genetic Genealogy (<http://www.isogg.org>) v. 9.129 (accessed Dec. 08, 2014). We called genotypes by requiring map quality and base quality  $\geq 30$ , omitting 2 bases at the ends of reads, and taking the majority allele. For each individual, we determined the most derived SNP as well as downstream SNPs for which the individual was ancestral. The summary of Y-chromosome assignments is shown in Table S6.1, and the details are discussed below.

**Table S6.1: Y-chromosome haplogroup assignments of ancient Near Easterners.**

| Region  | ID    | Haplogroup                                            | Population                |
|---------|-------|-------------------------------------------------------|---------------------------|
| Armenia | I1407 | L1a                                                   | Armenia_Chalcolithic      |
|         | I1632 | L1a                                                   | Armenia_Chalcolithic      |
|         | I1634 | L1a                                                   | Armenia_Chalcolithic      |
| Iran    | I1293 | J(xJ2a1b3,J2b2a1a1)                                   | Iran_Mesolithic           |
|         | I1945 | P1(xQ,R1b1a2,R1a1a1b1a1b,R1a1a1b1a3a,R1a1a1b2a2a)     | Ganj_Dareh_Iran_Neolithic |
|         | I1949 | CT                                                    | Ganj_Dareh_Iran_Neolithic |
|         | I1671 | G2a1(xG2a1a)                                          | Iran_Late_Neolithic       |
|         | I1662 | J(xJ1a,J2a1,J2b)                                      | Iran_Chalcolithic         |
|         | I1674 | G1a(xG1a1)                                            | Iran_Chalcolithic         |
| Levant  | I0861 | E1b1b1b2(xE1b1b1b2a,E1b1b1b2b)                        | Israel_Natufian           |
|         | I1069 | E1b1(xE1b1a1,E1b1b1b1)                                | Israel_Natufian           |
|         | I1072 | E1b1b1b2(xE1b1b1b2a,E1b1b1b2b)                        | Israel_Natufian           |
|         | I1685 | CT                                                    | Israel_Natufian           |
|         | I1690 | CT                                                    | Israel_Natufian           |
|         | I0867 | H2                                                    | PPNB                      |
|         | I1414 | E(xE2,E1a,E1b1a1a1c2c3b1,E1b1b1b1a1,E1b1b1b2b)        | PPNB                      |
|         | I1415 | E1b1b1                                                | PPNB                      |
|         | I1416 | CT                                                    | PPNB                      |
|         | I1707 | T(xT1a1,T1a2a)                                        | PPNB                      |
|         | I1710 | E1b1b1(xE1b1b1b1a1,E1b1b1a1b1,E1b1b1a1b2,E1b1b1b2a1c) | PPNB                      |
|         | I1727 | CT(xE,G,J,LT,R,Q1a,Q1b)                               | PPNB                      |
|         | I1700 | CT                                                    | PPNC                      |
|         | I1705 | J1(xJ1a)                                              | Jordan_EBA                |
|         | I1730 | J(xJ1,J2a,J2b2a)                                      | Jordan_EBA                |

### **Armenia\_ChL (Chalcolithic Armenia)**

All three males from this population belong to Y-chromosome haplogroup L1a-M27/P329. The M27 mutation is common in South Asian haplogroup L Y-chromosomes<sup>1,2</sup>, but was absent in a survey of Y-chromosomes from Anatolia<sup>3</sup>. Haplogroup L occurs at a very low ~2% frequency in present-day Armenians<sup>4</sup>. Our results indicate that it was present in Chalcolithic Armenia, but the fact that all three Chalcolithic Armenians belonged to it should not be necessarily interpreted as evidence that it was common there, as our samples are from a single location (Areni-1 cave) and may represent a local founder population.

#### I1407: L1a

This individual was derived for mutations P329, M27, M76 defining haplogroup L1a, as well as upstream mutations defining haplogroup L1 (L656, L1304) and L (L863, L878, M61). No calls were made for SNPs downstream of L1a, thus it is placed in haplogroup L1a.

#### I1632: L1a

This individual was derived for mutations P329, M27, M76 defining haplogroup L1a, as well as upstream mutations defining haplogroup L1 (L656, M22, L1304) and L (L878, M185, M61). No calls were made for SNPs downstream of L1a, thus it is placed in haplogroup L1a.

#### I1634: L1a

This individual was derived for mutations P329, M27 defining haplogroup L1a, as well as an upstream mutation defining haplogroup L1 (L656) and L (L878, M185, M11, M61, L855). No calls were made for SNPs downstream of L1a, thus it is placed in haplogroup L1a.

### **Iran\_Mesolithic**

#### I1293: J(xJ2a1b3, J2b2a1a1)

This individual belonged to haplogroup J, supported by mutations PF4519, FGC3271, PF4530, CTS5934, F2839, PF4619. It was found to be ancestral for L227 (J2a1b3) and Z639 (J2b2a1a1) and could be designated as J(xJ2a1b3, J2b2a1a1).

### **Iran\_N**

#### I1945: P1(xQ, R1b1a2, R1a1a1b1a1b, R1a1a1b1a3a, R1a1a1b2a2a)

This individual belonged to haplogroup P1 on the basis of mutation P282. It was ancestral for downstream haplogroups Q (F1237.1, FGC4603), R1b1a2 (CTS12478), R1a1a1b1a1b

(CTS11962), R1a1a1b1a3a (L448), and R1a1a1b2a2a (Z2123). Thus, it could be designated P1(xQ, R1b1a2, R1a1a1b1a1b, R1a1a1b1a3a, R1a1a1b2a2a).

#### I1949: CT

This individual belonged to haplogroup CT, supported by mutations M5593, PF228, M5624, PF342, Z17710, CTS2842, CTS5532, M5730, M5751, M5765, CTS11358.

#### **Iran\_LN**

##### I1671: G2a1(xG2a1a)

This individual belonged to haplogroup G2a1, supported by mutations FGC666, FGC587, FGC7537, FGC592, FGC7533, FGC593, FGC594, FGC7536, FGC600, FGC602, FGC606, FGC607, FGC610, FGC617, FGC618, FGC7543, FGC7547, FGC631, FGC7546, FGC635, FGC637, FGC639, FGC641. It was ancestral for mutations FGC703, FGC741, FGC762 defining haplogroup G2a1a. Thus, it could be designated G2a1(xG2a1a). Haplogroup G2a2 was common in Anatolian Neolithic<sup>5</sup> and Early European<sup>6</sup> farmers. Thus, the parent haplogroup G2a could be a genetic link between these Neolithic populations and those of the Iranian plateau, a link also supported by the statistic  $f_4(\text{Iran\_LN}, \text{Iran\_N}; \text{Anatolia\_N}, \text{Chimp}) = 0.00213$  ( $Z=4.3$ ) which suggests that the Anatolian Neolithic shares more alleles with Late Neolithic Iran from Seh Gabi rather than with the Early Neolithic Iran from Ganj Dareh.

#### **Iran\_ChL (Chalcolithic Iran)**

##### I1662: J(xJ1a, J2a1, J2b)

This individual was derived for mutations PF4505, CTS1250, PF4513, F1181, PF4519, PF4530, L60, F1744, CTS2769, F2116, CTS5628, CTS7229, PF4567, PF4572, F2746, F2769, CTS8974, CTS9877, CTS10446, F3119, PF4591, F3176, PF4594, FGC1599, L778, CTS11571, CTS11750 placing it in haplogroup J. It was ancestral for haplogroups J1a (CTS5368), J2a1 (L26), and J2b (M314). Thus, it is placed in haplogroup J(xJ1a, J2a1, J2b).

##### I1674: G1a(xG1a1)

This individual was derived for mutations F4113, F1761 placing it in haplogroup G1a, and upstream mutations Z17861, Z17868, Z17869, M285, M342 placing it in haplogroup G1. It was ancestral for downstream mutation L1324 (G1a1), and could be designated as G1a(xG1a1). A correspondence between haplogroup G1 and ancient Iranian speakers of both the Iranian plateau and steppe area has recently been proposed<sup>7</sup>, with a suggestion based on STR variation of a likely homeland in the Iranian Plateau and the Armenian Highlands. While our data do not address this question directly, it does establish the presence of G1a in Iran as

early as the Chalcolithic period (~4,500-3,500 BCE) prior to the formation and expansion of steppe pastoralist populations like the Yamnaya<sup>8</sup>, making it less likely that it was introduced into the Iranian plateau by steppe migrants.

### **Natufians**

#### I0861: E1b1b1b2(x E1b1b1b2a, E1b1b1b2b)

This individual was derived for CTS11781 placing it in haplogroup E1b1b1b2 mutations M5108, CTS3637, CTS7154, PF1755, L796 defining haplogroup E1b1b1 and L336 (E1b1b). It was ancestral for L857 (E1b1b1b2a) and Z865 (E1b1b1b2b) and could be designated E1b1b1b2(x E1b1b1b2a, E1b1b1b2b).

#### I1069: E1b1(xE1b1a1, E1b1b1b1)

This individual was derived for mutation P179 defining haplogroup E1b1 and upstream mutation M5403 defining haplogroup E. It was ancestral for Z1116 (E1b1a1), CTS8649 (E1b1b1b1) and could be designated as E1b1(xE1b1a1, E1b1b1b1).

#### I1072: E1b1b1b2(xE1b1b1b2a, E1b1b1b2b)

This individual was derived for mutations CTS8182, CTS11781 defining haplogroup E1b1b1b2 and upstream mutations L117, PF1755, CTS9324, L796 defining haplogroup E1b1b1. It was ancestral for CTS1652 (E1b1b1b2a) and CTS11051, CTS11574 (E1b1b1b2b), and could be designated as E1b1b1b2(xE1b1b1b2a, E1b1b1b2b).

#### I1685: CT

This could only be assigned to haplogroup CT on the basis of mutations CTS9555, Y1580.

#### I1690: CT

This could only be assigned to haplogroup CT on the basis of mutations Y1462, M5723, L977.

### **Levant\_N**

#### I0867: H2 (PPNB)

This individual was derived for mutation P96 defining haplogroup H2 as well as upstream mutations M2713, M2896, M2936, M2942, M2992, M3070 defining haplogroup H. It was not **derived** for any downstream mutations so it could be designated simply as H2. Haplogroup H2 has also been found in Neolithic farmers from Anatolia and Europe<sup>5,6</sup>, and thus represents a common genetic signature of several ancient Neolithic farmer groups.

I1414: E(xE2, E1a, E1b1a1a1c2c3b1, E1b1b1b1a1, E1b1b1b2b) (PPNB)

This individual was derived for mutation CTS2893 defining haplogroup E and also the upstream mutation P167 defining haplogroup DE. It was ancestral for haplogroup E1a (Z15455, Z912, CTS3507, CTS11248), E1b1a1a1c2c3b1 (Z16129, Z16130), E1b1b1b1a1 (CTS10196), E1b1b1b2b (M293), and E2 (CTS11446, CTS11447). Thus it could be designated E(xE2, E1a, E1b1a1a1c2c3b1, E1b1b1b1a1, E1b1b1b2b).

I1415: E1b1b1 (PPNB)

This individual was derived for mutation CTS2216 defining haplogroup E1b1b1.

I1416: CT (PPNB)

This individual could only be assigned to haplogroup CT on the basis of mutations CTS7933, M5786.

I1707: T(xT1a1, T1a2a) (PPNB)

This individual was derived for mutations PF7466, CTS7263, CTS10416 defining haplogroup T. It was ancestral for FGC3945.2 (T1a1) and P322 (T1a2a). Thus, it could be designated T(xT1a1, T1a2a). It has been suggested that haplogroup T first began to diversify in the Near East<sup>9</sup> and our results document that it was present there in some of the earliest Neolithic communities of the Near East, providing a plausible source for its appearance in the Early Neolithic of central Europe<sup>6</sup>.

I1710: E1b1b1(x E1b1b1b1a1, E1b1b1a1b1, E1b1b1a1b2, E1b1b1b2a1c) (PPNB)

This individual was derived for mutation M5041 defining haplogroup E1b1b1, and upstream mutations CTS8479.1 (E1b1b), and E1 (CTS9753). It was ancestral for E1b1b1b1a1 (CTS5819), E1b1b1a1b1 (L618), E1b1b1a1b2 (CTS5479), and E1b1b1b2a1c (V23). Thus, it could be designated E1b1b1(x E1b1b1b1a1, E1b1b1a1b1, E1b1b1a1b2, E1b1b1b2a1c).

I1727: CT(xE, G, J, LT, R, Q1a, Q1b) (PPNB)

This individual was derived for mutations M5723, CTS7922, M5769, M5822, M5823 defining haplogroup CT. It was ancestral for haplogroup E (M5452), G (L770, M3479, PF2918, CTS2125, CTS2271), J (F1167, CTS7229, CTS9533), LT (L298), R (P285), Q1a (CTS5301), Q1b (Y1080, Y1996), and thus could be designated CT(xE, G, J, LT, R, Q1a, Q1b).

I1700: CT (PPNC)

This individual could only be assigned to haplogroup CT on the basis of mutations M5603, M5624, CTS3460, M5822.

### **Levant\_BA**

#### I1705: J1(xJ1a)

This individual belonged to haplogroup J1, supported by mutation M267. It was ancestral for haplogroup J1a (M365.1) and could be designated J1(xJ1a). Haplogroup J1 is common in present-day Levantine populations<sup>10</sup> and our result documents its earliest existence in the Bronze Age Levant.

#### I1730: J(xJ1, J2a, J2b2a)

This individual also belonged to haplogroup J, supported by mutations CTS687, CTS1250, PF4513, F1167, F1181, PF4519, PF4521, PF4524, FGC3271, PF4530, F1826, CTS4349, CTS5280, F2114, F2116, CTS5628, CTS5678, CTS7229, F2502, CTS7738, F2769, CTS8974, F2817, F2839, CTS10446, F3119, F4299, S22619, PF4591, F3176, FGC1599, YSC0000228, CTS10858, CTS11291, L778, CTS11571, CTS11750, PF4619, CTS12047. Unlike, I1705, it was ancestral for haplogroup J1 (M267). It was also ancestral for haplogroup J2a (L152, L212) and J2b2a (L283). Thus, it could be designated J(xJ1, J2a, J2b2a).

### **Discussion**

We highlight two aspects of the Y-chromosome distribution in the ancient Near East.

First, the Mesolithic individual from Iran belonged to haplogroup J. This has also been detected in two hunter-gatherers from the Upper Paleolithic in Georgia<sup>11</sup>, as well as in a hunter-gatherer from Karelia in northwest Russia<sup>5</sup>, suggesting that it had a widespread early distribution prior to the spread of farming with which its current distribution was initially associated<sup>12</sup>. While the hunter-gatherers from Georgia resemble the one from Iran (Fig. 1b), their whole genome data shows very different patterns from the Eastern European hunter-gatherer who also possessed this haplogroup, as well as from a singleton Anatolian early farmer who belonged to haplogroup J2a<sup>5</sup>. This should serve as a note of caution against the idea that Y-chromosome lineages can be thought as markers of populations and population movements: the two sometimes coincide as with the sudden increase of haplogroups R1a and R1b in mainland Europe coinciding with an influx of steppe migrants around ~4,500 years ago<sup>6</sup>, or the spread of migrants carrying haplogroup G2a2 during the early Neolithic settlement of Europe<sup>5</sup>. With this caveat in mind, it is nonetheless interesting that haplogroup J was present in EHG, CHG, and Mesolithic Iran, given the evidence for a relationship between these populations presented in Supplementary Information, sections 4, 7. Additional sampling



of earlier individuals from eastern Europe and western Asia may elucidate the nature of this relationship. We also note one instance of a possible relationship between haplogroup J and the appearance of possible admixture event: two of the Bronze Age samples from the Levant belong to this haplogroup, while none of the earlier samples of Natufians and Pre-Pottery Neolithic individuals do. In Supplementary Information section 7, we infer that Levant\_BA can be modeled as a mixture of Levant\_N and Iran\_ChL. The Y chromosome results suggest that haplogroup J migrants from the north of the Levant may have been involved in this mixture event.

Second, we observed that all three Natufian individuals that could be assigned to a specific haplogroup belonged to haplogroup E1b1. This is thought to have an East African origin, and a 4,500-year old individual from the Ethiopian highlands<sup>13</sup> belonged to it. An African origin of the Natufians has been proposed based on their ‘Sub-Saharan’ cranial morphology<sup>14</sup> in comparison to later West Eurasian samples. However, when we test whether present-day Sub-Saharan Africans share more alleles with Natufians than they do with other ancient West Eurasian individuals, we do not find the expected asymmetry if Natufians have ancestry related to present-day Sub-Saharan Africans (Extended Data Table 1). The existence of haplogroup E1b1 in ancient East Africa and the nearby Levant in the two earliest samples from both regions raises questions about its ultimate origin. This haplogroup continues to exist in the Pre-Pottery Neolithic period, but it is not documented in ancient Europe or the ancient Near East outside the Levant. This appears to be consistent with E1b1 being intrusive to the Near East from nearby Africa, rather than its having a long-term presence in the region. An association of E1b1 migrants from Africa with Basal Eurasian ancestry is possible (Basal Eurasians are so named because of their phylogenetic position basal to other Eurasians not for their geographical provenance; African migrants that did not participate in the initial Out-of-Africa expansion would occupy such a basal position to other Eurasians). However, such ancestry is not limited to the Levant, but also extends to the whole of Near East (where E1b1 chromosomes have not been detected). Thus, we think that both the late entry scenario of Basal Eurasian ancestry into the Near East (associated with gene flow from Africa), or its earlier presence<sup>15</sup> in anatomically modern-humans from the Levant and Arabia >100,000 years<sup>16,17</sup> are still plausible.

While some Y-chromosomal lineages (such as H2, T, and G2a) span more than one early Neolithic population in West Eurasia, none of them are found in all of them (Levant, Iran, and Northwestern Anatolia/Europe), in agreement with the conclusion based on the analysis of autosomal data that the Neolithic of West Eurasia either began (or was taken up soon after its beginning) by genetically diverse populations.

## References

1. Thanseem, I. *et al.* Genetic affinities among the lower castes and tribal groups of India: inference from Y chromosome and mitochondrial DNA. *BMC Genet.* **7**, 42, (2006).
2. Sengupta, S. *et al.* Polarity and temporality of high-resolution y-chromosome distributions in India identify both indigenous and exogenous expansions and reveal minor genetic influence of Central Asian pastoralists. *Am. J. Hum. Genet.* **78**, 202-221, (2006).
3. Cinnioglu, C. *et al.* Excavating Y-chromosome haplotype strata in Anatolia. *Hum. Genet.* **114**, 127-148, (2004).
4. Herrera, K. J. *et al.* Neolithic patrilineal signals indicate that the Armenian plateau was repopulated by agriculturalists. *Eur. J. Hum. Genet.* **20**, 313-320, (2012).
5. Mathieson, I. *et al.* Genome-wide patterns of selection in 230 ancient Eurasians. *Nature (in press)*, (2015).
6. Haak, W. *et al.* Massive migration from the steppe was a source for Indo-European languages in Europe. *Nature* **522**, 207-211, (2015).
7. Balanovsky, O. *et al.* Deep Phylogenetic Analysis of Haplogroup G1 Provides Estimates of SNP and STR Mutation Rates on the Human Y-Chromosome and Reveals Migrations of Iranian Speakers. *PLoS ONE* **10**, e0122968, (2015).
8. Anthony, D. W. *The Horse, the Wheel, and Language: How Bronze-Age Riders from the Eurasian Steppes Shaped the Modern World.* (Princeton University Press, 2007).
9. Mendez, F. L. *et al.* Increased Resolution of Y Chromosome Haplogroup T Defines Relationships among Populations of the Near East, Europe, and Africa. *Hum. Biol.* **83**, 39-53, (2011).
10. Semino, O. *et al.* Origin, Diffusion, and Differentiation of Y-Chromosome Haplogroups E and J: Inferences on the Neolithization of Europe and Later Migratory Events in the Mediterranean Area. *Am. J. Hum. Genet.* **74**, 1023-1034, (2004).
11. Jones, E. R. *et al.* Upper Palaeolithic genomes reveal deep roots of modern Eurasians. *Nat. Commun.* **6**, 8912, (2015).
12. Rosser, Z. H. *et al.* Y-Chromosomal Diversity in Europe Is Clinal and Influenced Primarily by Geography, Rather than by Language. *Am. J. Hum. Genet.* **67**, 1526-1543, (2000).
13. Llorente, M. G. *et al.* Ancient Ethiopian genome reveals extensive Eurasian admixture throughout the African continent. *Science* **350**, 820-822, (2015).
14. Brace, C. L. *et al.* The questionable contribution of the Neolithic and the Bronze Age to European craniofacial form. *Proc. Natl. Acad. Sci. U. S. A.* **103**, 242-247, (2006).
15. Lazaridis, I. *et al.* Ancient human genomes suggest three ancestral populations for present-day Europeans. *Nature* **513**, 409-413, (2014).
16. Bar-Yosef, O. *The chronology of the Middle Paleolithic of the Levant.* 39-56 (New York: Plenum Press, 1998).
17. Rose, J. I. *et al.* The Nubian Complex of Dhofar, Oman: an African middle stone age industry in Southern Arabia. *PLoS ONE* **6**, e28239, (2011).

# Supplementary Information 7

## Admixture history of ancient west Eurasians

In this section we study the admixture history of ancient west Eurasian populations using methods developed in ref. 1. The idea of these methods is to relate a *Test* population (whose history of admixture we are interested in studying) to a set of *Outgroup* populations (who are populations unlikely to have contributed to *Test* directly) via a set of *Reference* populations (who are clades – with respect to the *Outgroups* – of populations contributing ancestry to *Test*). Given this setup, we can write  $f_4$ -statistics of the form  $f_4(\text{Test}, O_1; O_2, O_3)$  as a weighted sum of the statistics of the *Reference* populations:

$$f_4(\text{Test}, O_1; O_2, O_3) = \sum_{i=1}^N \alpha_i f_4(\text{Ref}_i, O_1; O_2, O_3)$$

Given  $m$  *Outgroups*, there are  $m \binom{m-1}{2}$  equations of the above form, which allow us to fit the mixture coefficients by regression. A related formulation uses statistics of the form  $f_4(\text{Test}, \text{Ref}_i; O_2, O_3)$ . This is based on the observation that  $f_4(\text{Test}, \text{Ref}_i; O_2, O_3) = f_4(\text{Test}, O_1; O_2, O_3) - f_4(\text{Ref}_i, O_1; O_2, O_3)$ , which leads to a restatement of the admixture equation as:

$$\sum_{i=1}^N \alpha_i f_4(\text{Test}, \text{Ref}_i; O_2, O_3) = 0$$

There are  $\binom{m}{2}$  equations of the above form that again allow us to fit the mixture coefficients. We do not repeat the theory here, except to say that if the *References* vary in their relationship to the *Outgroups*, it is possible to extract the mixture coefficients using this methodology. There are two main advantages: (i) First, these statistics are not influenced by genetic drift specific to either the *Test* or *Reference* populations, but only by genetic drift shared by the *Outgroups* and *References* (and through the *References* with *Test*). Thus, we do not need to have access to data from the exact population that participated in the mixing, and instead can use as a *Reference* a population that is genetically very drifted from it (albeit phylogenetically a clade with it). (ii) Second, the phylogeny relating the various *Outgroups* does not need to be known explicitly, and hence we can leverage genetic drift shared with populations whose relationships may be complicated without having to attempt to model those relationships explicitly. The fact that we do not need to determine the phylogenetic relationships among all the populations used in the analysis makes our inference procedure more robust.

This methodology has been implemented in the *qpWave* and *qpAdm* programs (<https://github.com/DReichLab>). *qpWave* tests whether a set of *Left* populations is consistent

with being descended from as few as  $N$  source populations (that is, the pattern of shared genetic drift with the *Right* populations can be entirely explained as due to  $N$  source populations). Typically, the *Right* population set is the set of *Outgroups*. The *Left* population set is either the set of *References*, allowing us to check whether  $N$  *References* can be distinguished by the set of *Outgroups*, or the combined set of the *Test* population with the *References*. This setup allows us to check whether the addition of the *Test* population increases the necessary number of source populations, which in turn indicates that the *Test* population cannot be well-modeled as an  $N$ -way mixture of populations that are clades with the *References*. In the discussion that follows, we will refer to the rank of the matrix:

$$X(u, v) = F_4(u_0, u; v_0, v)$$

Where  $u$  is a “*Left*” and  $v$  is a “*Right*” population and  $u_0, v_0$  are basis populations from the *Left* and *Right* sets. It has been shown<sup>2</sup> that this matrix has rank  $N-1$  if there are  $N$  waves of migration. Having verified that a population can be modeled as an  $N$ -way mixture, we can use *qpAdm* to compute its mixture coefficients.

We used a basic set of 9 *Outgroups*, including diverse non-west Eurasian present-day populations from Africa, East Asia, Oceania, the Andaman Islands, North Asia, and the Americas, as well as the Upper Paleolithic genomes of Ust\_Ishim<sup>3</sup> from Siberia ~45,000 years ago, Kostenki14 from Russia ~37,000 years ago<sup>4</sup>, and MA1 from Siberia ~24,000 years ago.<sup>5</sup> These samples reside in informative places of the phylogeny: Ust\_Ishim is symmetrically related to European hunter-gatherers and eastern non-Africans<sup>1,3</sup>; Kostenki14 is the oldest sample that shares more alleles with recent west Eurasians than eastern non-Africans<sup>4</sup>; MA1 shares genetic drift with recent west Eurasians but also with native Americans as it is related to populations that admixed with both<sup>5,6</sup>. We do not use the Upper Paleolithic genome of Oase1 from Romania dating to ~40,000 years ago<sup>7</sup> due to its European contamination and high Neandertal admixture.

**O9:** Ust\_Ishim, Kostenki14, MA1, Han, Papuan, Onge, Chukchi, Karitiana, Mbuti

Our goal in this section is to quantify admixture in ancient west Eurasian populations. Before we begin, two caveats are necessary:

First, we are dealing with samples from particular places and times, and our genetic models investigate relationships among them. As a result, when we derive a population’s ancestry from Iran\_N, we do not necessarily postulate a migration from present-day Iran, but rather admixture with a population related, perhaps anciently, to Iran\_N. The geographic distribution of populations like Iran\_N (or indeed any other) is currently unknown.

Second, we are likely missing pieces of the puzzle, and we make our best attempt to fit the existing pieces into a coherent picture. For example, previous work has modeled Europeans as mixtures of either farmers and hunter-gatherers from Sweden<sup>8</sup>, or early farmers/present-day Sardinians and an ‘Ancient North Eurasian’ (ANE) population forming a clade with Native Americans<sup>9,10</sup>. This was amended by the publication of data from Upper Paleolithic Siberians<sup>5</sup> which showed that Native Americans were a mixture of Upper Paleolithic Siberians and eastern non-Africans<sup>5</sup>, and of the western European hunter-gatherers<sup>6</sup> from Luxembourg<sup>6</sup> and Iberia<sup>11,12</sup> which allowed the inference that present-day Europeans had at least three ancestral populations<sup>6</sup> related to the early European farmers (EEF), Upper Paleolithic Siberians (ANE), and western European hunter-gatherers (WHG). The ANE component was absent in mainland Europe before and during the Early Neolithic<sup>6</sup> except in Scandinavian hunter-gatherers<sup>6,13</sup>, suggesting that it became pervasive in Europe after the arrival of the early farmers<sup>6</sup>. A more proximate source and a better understanding of the arrival of ANE were made possible by the sampling of the eastern European hunter-gatherers (EHG)<sup>1</sup> and the Yamnaya steppe pastoralists<sup>1,14</sup>. Similarly, in a previous study we estimated Near Eastern admixture in early European farmers in a roundabout way using present-day Near Eastern populations<sup>6</sup>, and in Yamnaya steppe pastoralists using present-day Armenians<sup>1</sup>. We are now in a position to study the history of admixture in west Eurasia using a more extensive collection of populations from both Europe and the Near East. Despite the far better population coverage, some pieces may still be missing, such as the early farmers from the northern Levant, Mesopotamia, Central and Eastern Anatolia, the Arabian Peninsula, and the southern and northern Caucasus which may differ from those in our study.

**Levant\_N, Iran\_N, WHG, EHG (the “Four”) are related by four streams of ancestry to the outgroups**

The two Neolithic populations from the ancient Near East (Levant\_N and Iran\_N) and the two Mesolithic/Neolithic hunter-gatherer populations from Europe (WHG and EHG) are maximally differentiated in the PCA (Fig. 1b) We use Left=Four and Right=O9.

**Table S7.1: The “Four” can be distinguished by the O9 outgroups**

| <b>Rank</b> | <b>d.o.f.</b> | <b><math>\chi^2</math></b> | <b>P</b>  |
|-------------|---------------|----------------------------|-----------|
| 0           | 24            | 1343.399                   | 6.16E-269 |
| 1           | 14            | 246.287                    | 1.68E-44  |
| 2           | 6             | 27.132                     | 1.37E-04  |

Rank=2 can be rejected ( $P=0.000137$ ), thus there is at least rank=3 or 4 streams of ancestry relating the Four to the O9 outgroups. This is a useful check to show that the reference populations can be distinguished by the outgroups.

**Ancient West Eurasian populations other than the “Four” do not require an additional stream of ancestry from the outgroups**

We next add each ancient West Eurasian *Test* population to the set of “Four”. If rank=3 can be excluded, this means that at least 5 streams of ancestry relate the quintuple (*Test*, Levant\_N, Iran\_N, WHG, EHG) to the O9. However, with the exception of the Steppe\_IA population, we cannot exclude rank=3 (Table S7.2).

**Table S7.3: Testing for rank=3 for the Left=(*Test*, Levant\_N, Iran\_N, WHG, EHG) and Right=O9.**

| <i>Test</i>       | P        | Proportions |        |        |        | Standard Errors |        |       |       |
|-------------------|----------|-------------|--------|--------|--------|-----------------|--------|-------|-------|
|                   |          | Levant_N    | Iran_N | WHG    | EHG    | Levant_N        | Iran_N | WHG   | EHG   |
| Anatolia_ChL      | 2.36E-01 | 0.649       | -0.016 | 0.277  | 0.090  | 0.412           | 0.438  | 0.095 | 0.062 |
| Anatolia_N        | 4.63E-01 | 0.331       | 0.331  | 0.407  | -0.069 | 0.108           | 0.114  | 0.045 | 0.027 |
| Armenia_ChL       | 9.54E-01 | 0.145       | 0.437  | 0.243  | 0.175  | 0.110           | 0.117  | 0.057 | 0.034 |
| Armenia_EBA       | 5.16E-02 | 0.029       | 0.704  | 0.193  | 0.074  | 0.203           | 0.214  | 0.078 | 0.046 |
| Armenia_MLBA      | 1.44E-01 | -0.187      | 0.913  | 0.087  | 0.187  | 0.238           | 0.247  | 0.098 | 0.055 |
| CHG               | 4.59E-01 | 0.037       | 0.700  | 0.159  | 0.105  | 0.189           | 0.204  | 0.082 | 0.045 |
| Europe_EN         | 6.23E-01 | 0.176       | 0.455  | 0.431  | -0.062 | 0.110           | 0.117  | 0.050 | 0.029 |
| Europe_LNBA       | 2.85E-01 | -0.089      | 0.532  | 0.317  | 0.240  | 0.121           | 0.130  | 0.052 | 0.031 |
| Europe_MNChL      | 3.91E-01 | 0.168       | 0.365  | 0.520  | -0.053 | 0.127           | 0.138  | 0.047 | 0.028 |
| Iberia_BA         | 6.85E-01 | 0.474       | 0.066  | 0.326  | 0.135  | 0.272           | 0.297  | 0.097 | 0.052 |
| Iran_ChL          | 5.11E-02 | -0.011      | 0.841  | 0.114  | 0.055  | 0.218           | 0.229  | 0.082 | 0.047 |
| Iran_LN           | 9.73E-01 | 0.095       | 0.880  | 0.105  | -0.080 | 0.220           | 0.224  | 0.106 | 0.060 |
| Iran_HotulIb      | 7.70E-01 | -0.539      | 1.384  | 0.085  | 0.070  | 0.493           | 0.474  | 0.252 | 0.147 |
| Iran_recent       | 3.91E-01 | -0.258      | 1.031  | 0.201  | 0.026  | 0.269           | 0.284  | 0.129 | 0.071 |
| Levant_BA         | 7.96E-01 | 0.583       | 0.301  | 0.134  | -0.018 | 0.132           | 0.142  | 0.061 | 0.034 |
| Natufian          | 1.35E-01 | 1.201       | -0.094 | -0.024 | -0.083 | 0.493           | 0.482  | 0.153 | 0.096 |
| SHG               | 2.74E-01 | -0.008      | 0.090  | 0.479  | 0.439  | 0.163           | 0.167  | 0.057 | 0.037 |
| Steppe_EMBA       | 3.97E-01 | -0.236      | 0.597  | 0.131  | 0.508  | 0.139           | 0.145  | 0.061 | 0.038 |
| Steppe_Eneolithic | 5.74E-02 | -0.430      | 0.635  | 0.069  | 0.727  | 0.327           | 0.338  | 0.104 | 0.072 |
| Steppe_IA         | 2.16E-02 | -1.232      | 1.588  | 0.374  | 0.270  | 0.806           | 0.876  | 0.199 | 0.117 |
| Steppe_MLBA       | 1.96E-01 | -0.115      | 0.530  | 0.251  | 0.334  | 0.136           | 0.144  | 0.055 | 0.034 |
| Switzerland_HG    | 5.35E-01 | 0.311       | -0.296 | 1.009  | -0.023 | 0.237           | 0.254  | 0.087 | 0.055 |

This motivates us to attempt to derive ancient West Eurasian populations from the “Four”. Note that while we can estimate mixture proportions (Table S7.3) in terms of the “Four” using the O9 set of outgroups, these are very “noisy” estimates, with high standard errors and infeasible negative estimated mixture proportions. Some of the *Test* populations may be

simpler than 4-way mixtures, and the mixture proportions of some may be clarified by introducing additional outgroups to the Right set that can tease out better differences between the reference populations.

### The Natufians and the origin of the Neolithic in the Levant

When modeling different west Eurasian populations (Table S7.3) we infer that the Natufians have ancestry (>100%) from the Levant\_N, suggesting a relationship between them and the Neolithic populations of the Pre-Pottery Neolithic that succeeded them. To better understand this relationship, we studied  $f_4$ -statistics of the form  $f_4(\text{Natufian}, \text{Levant\_N}; \text{Test}, \text{Chimp})$ ,  $f_4(\text{Test}, \text{Natufian}; \text{Levant\_N}, \text{Chimp})$ , and  $f_4(\text{Test}, \text{Levant\_N}; \text{Natufian}, \text{Chimp})$  (Fig. S7.1-3).

**Figure S7.1: Testing for symmetry between the Natufians and the Neolithic of the Levant with the statistic  $f_4(\text{Natufian}, \text{Levant\_N}; \text{Test}, \text{Chimp})$ .** In this and following figures, the estimate and  $\pm 3$  standard errors is shown.

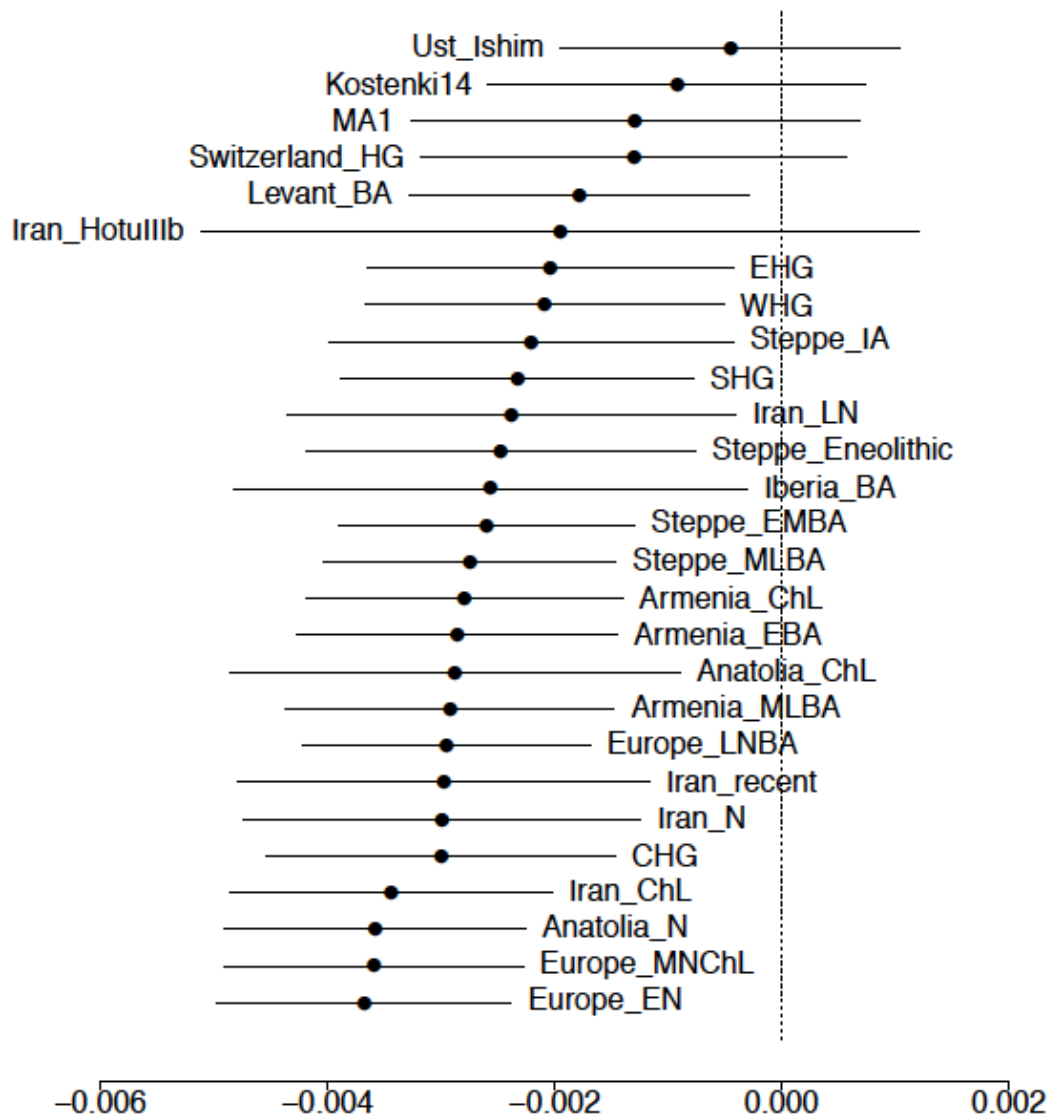

Fig. S7.1 shows that Natufians and the Neolithic of the Levant are asymmetric to ancient West Eurasian populations, with the Levantine Neolithic sharing more alleles with them than the Natufians did. Some of this asymmetry can be interpreted as gene flow from the Near East beginning in the Pre\_Pottery Neolithic which begun ~3000 years prior to the Pottery Neolithic populations in Western Anatolia, which dispersed into Europe. The Pre-Pottery Neolithic is older than most other populations and migrations from the Near East and may have contributed ancestry from it to later populations of West Eurasia) However, this does not account for the fact that the three pre-Neolithic hunter-gatherer groups from Europe (WHG, EHG, SHG) and the one from the Caucasus (CHG) also share more alleles with the Neolithic of the Levant than with the Natufians (the value of the statistic is not significant for the HotuIIIb individual of likely Mesolithic date from Iran, however this is a singleton individual with fewer covered SNPs than the others).

A possible explanation for this phenomenon is an excess of Basal Eurasian ancestry in Natufians, as this would dilute their affinity to other populations, including the different pre-Neolithic Eurasians. However, several pieces of evidence argue against this interpretation. First, the statistic  $f_4(\text{Natufian, Levant\_N; Ust\_Ishim, Chimp}) = 0.00045$  ( $Z=0.9$ ) which does not provide evidence for asymmetry between Neolithic of the Levant and the Natufians with respect to Ust\_Ishim as would be expected for a population with substantial extra Basal Eurasian ancestry. Second, if an excess of Basal Eurasian ancestry in Natufians were responsible for this phenomenon, the observed asymmetry would also be observed for older Upper Paleolithic Eurasians such as Ust\_Ishim and Kostenki14, but it does not (Fig. S7.1). Third, the Levantine Neolithic does show evidence of admixture in terms of a negative  $f_3$ -statistic involving the Natufians and Neolithic Europeans and Anatolians (Table S7.4), suggesting that they are in fact admixed, and thus could share genetic drift with them via the non-Natufian portion of their ancestry.

**Table S7.4: Significantly negative statistics of the form  $f_3(\text{Levant\_N; Natufian, Test})$ .**

| <b>Test</b>  | <b><math>f_3(\text{Levant\_N; Natufian, Test})</math></b> | <b>Z</b> | <b>Number of SNPs</b> |
|--------------|-----------------------------------------------------------|----------|-----------------------|
| Europe_EN    | 0.00140                                                   | -3.6     | 122590                |
| Anatolia_N   | 0.00142                                                   | -3.3     | 122480                |
| Europe_MNChL | 0.00145                                                   | -3.0     | 121552                |



Figure S7.2: Testing whether the Neolithic of the Levant shares more alleles with the Natufians or with another *Test* population with the statistic  $f_4(\text{Test}, \text{Natufian}; \text{Levant}_N, \text{Chimp})$ .

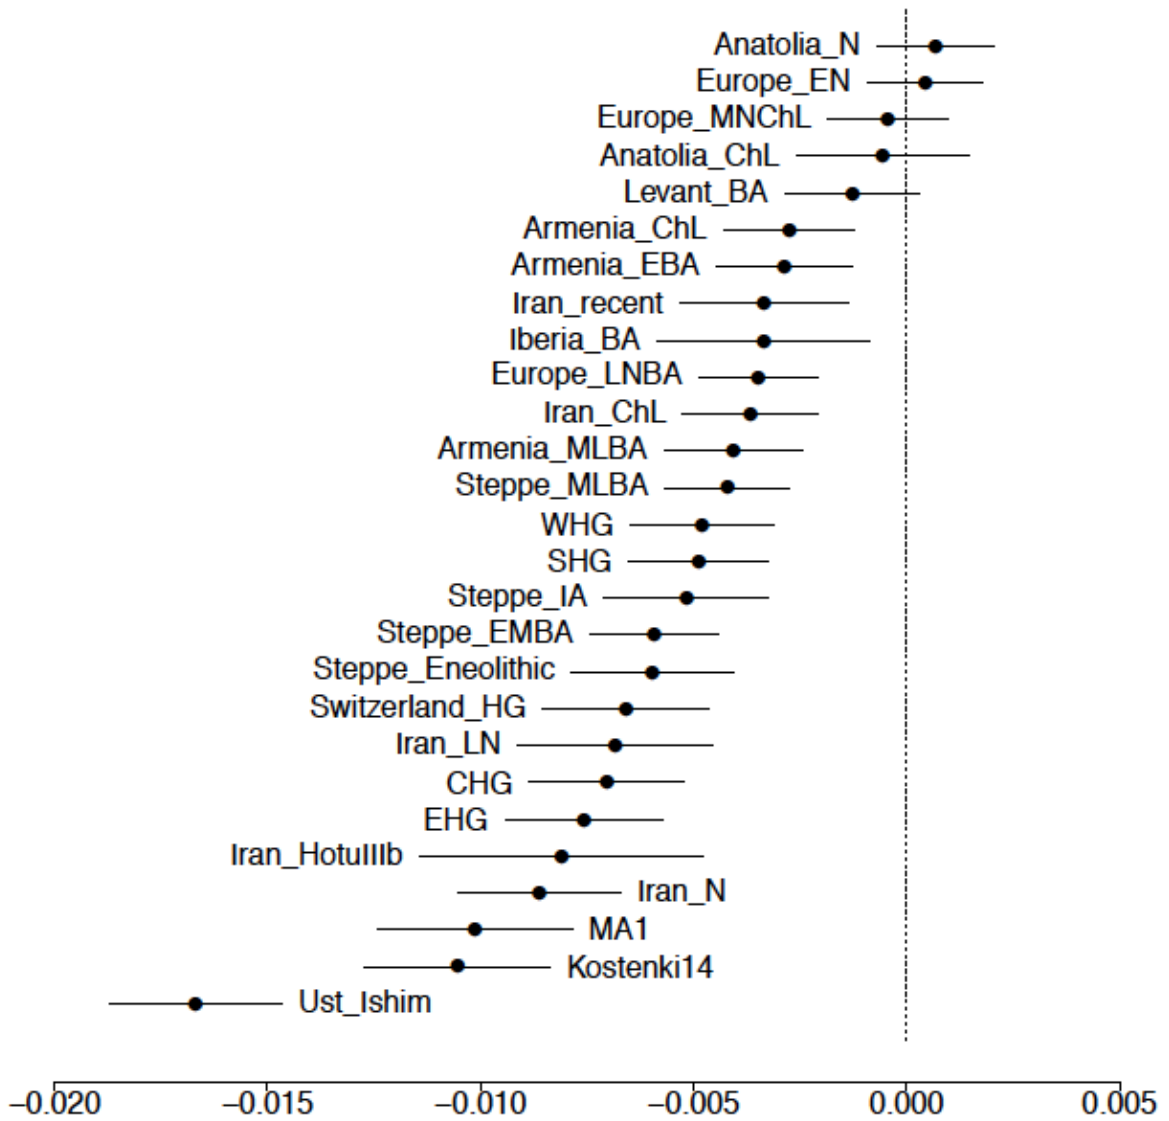

**Figure S7.3: Testing whether the Natufians share more alleles with the Neolithic of the Levant or with another *Test* population with the statistic  $f_4(\text{Test}, \text{Levant\_N}; \text{Natufian}, \text{Chimp})$ .**

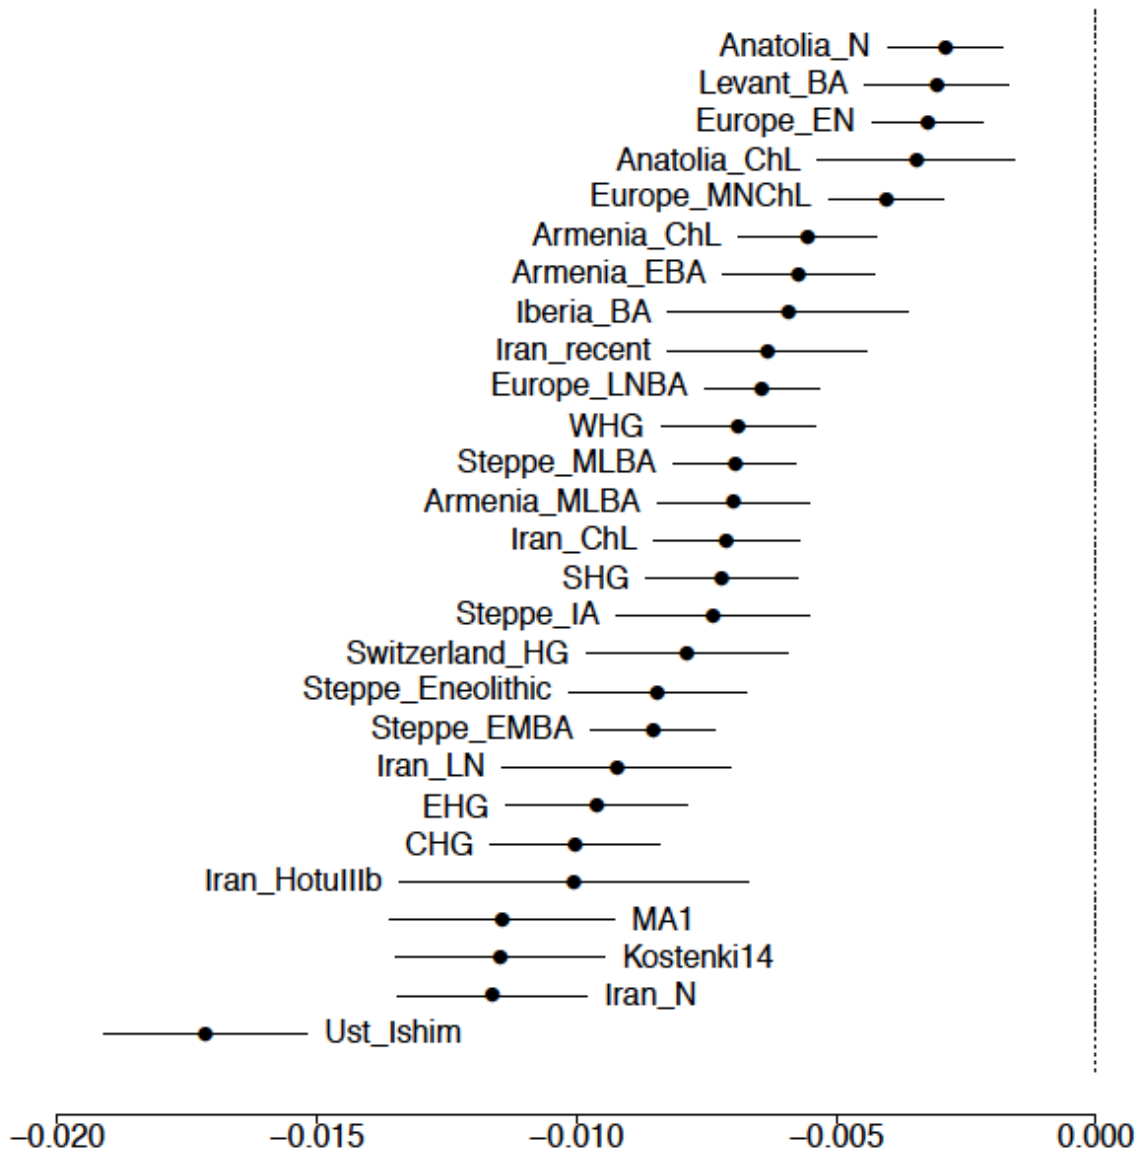

Fig. S7.2 shows that the Neolithic of the Levant shares more alleles with Natufians than all but five other ancient populations. These include the later Levantine Bronze Age population, but also populations from Anatolia and Neolithic Europe. The close relationship of the Anatolian and European Neolithic is established<sup>14,15</sup>, and our results suggest that the Anatolian could be related to the Levantine Neolithic as shared drift between the two would result in the statistic being higher. Nonetheless, it does not become significantly positive for any ancient West Eurasian population, and the Levantine Neolithic shares equally or less with the Natufians than with any other ancient West Eurasian population. Fig. S7.3 shows that the Natufians share more alleles with the Levantine

Neolithic than with any other ancient West Eurasian population, consistent with its admixture estimate (Table S7.3) and their clustering (Fig. 1b) with that population.

To understand the origin of the Levantine Neolithic we pair it with Natufians and a population  $A$  and test  $\text{Left}=(\text{Levant\_N}, \text{Natufian}, A)$ . Before we proceed, we introduce a shorthand notation to denote additional populations added to the set of Right outgroups in Table S7.4. This will be used in the rest of this Supplementary section.

**Table S7.4: Shorthand notation for adding outgroups to the Right set.** For example, O9CEIW is the O9 set with the addition of CHG, EHG, Iran\_N, and WHG.

| Code | Population     |
|------|----------------|
| A    | Anatolia_N     |
| C    | CHG            |
| E    | EHG            |
| I    | Iran_N         |
| L    | Levant_N       |
| N    | Natufian       |
| W    | WHG            |
| S    | Switzerland_HG |

In Table S7.5 we show the results of modeling Levant\_N as a mix of Natufians and a *Test* population which we choose to be one of Anatolia\_N, CHG, and Iran\_N, i.e., the earliest population from the other three Near Eastern regions of Anatolia, Caucasus, and Iran (Fig. 1a). When using  $\text{Right}=\text{O9}$  we observe that we cannot reject  $\text{rank}=1$  for any of the chosen  $A$  populations; this likely reflects the fact that they all share more alleles with Levant\_N than with Natufians (Fig. S7.1). By introducing additional outgroups to the Right set we are better able to distinguish between the different *Test* populations. In Supplementary Information, section 4 we observed that allele frequency differences between Neolithic Iran and Natufians are correlated with those of EHG and WHG, thus we introduce EHG and WHG into the Right set.

**Table S7.5: Modeling Levant\_N.** While Levant\_N can be modeled as a 2-way mixture of Natufians and various populations when the O9 outgroups are used, it can only be modeled as a mixture of Natufians and Anatolian Neolithic when introducing WHG and EHG as outgroups to the Right set.

| A                 | Right       | P for rank=1    | Mixture Proportions |              |              |
|-------------------|-------------|-----------------|---------------------|--------------|--------------|
|                   |             |                 | Natufian            | A            | Std. Error   |
| Anatolia_N        | O9          | 9.89E-02        | 0.670               | 0.330        | 0.098        |
| <b>Anatolia_N</b> | <b>O9EW</b> | <b>2.05E-01</b> | <b>0.667</b>        | <b>0.333</b> | <b>0.078</b> |
| CHG               | O9          | 2.23E-01        | 0.715               | 0.285        | 0.078        |
| CHG               | O9EW        | 1.64E-02        | 0.854               | 0.146        | 0.085        |
| Iran_N            | O9          | 8.28E-02        | 0.633               | 0.367        | 0.146        |
| Iran_N            | O9EW        | 7.02E-03        | 1.045               | -0.045       | 0.104        |

Using this approach we can reject every one of the candidates as sources for the Levant Neolithic *except* the Anatolian Neolithic ( $P=0.205$ ). This should not be interpreted literally as evidence that people from Anatolia moved into the Levant, admixed with Natufians and became the Levantine Neolithic. First, because we do not know the geographical extent of populations similar to our sample from Northwestern Anatolia, and second because an even better candidate population may be sampled in the future (perhaps from eastern Anatolia or Mesopotamia, regions that have some of the earliest evidence from agriculture). Nonetheless, this result seems tentatively sensible in view of (i) our results from PCA and ADMIXTURE (Fig. 1) that show that Levant\_N is intermediate between the Anatolian Neolithic and Natufians and shares with it an ancestral component, (ii)  $f_4$ -statistics which shows that the Anatolian Neolithic tops the statistic  $f_4(\text{Test}, \text{Natufian}; \text{Levant}_N, \text{Chimp})$  (Fig. S7.2), and (iii) the negative  $f_3$ -statistic of the form  $f_3(\text{Levant}_N; \text{Natufian}, \text{Anatolia}_N)$  (Table S7.4).

Thus, the genetic evidence suggests a combination of continuity (Fig. S7.3) and admixture (Table S7.5) in the origin of the Levantine Neolithic, with a best estimate of ancestry of  $66.7 \pm 7.8\%$  from the Natufians and  $33.3 \pm 7.8\%$  from a population related to the Anatolian Neolithic.

## Origin of the Neolithic of Iran and its relationship to the Mesolithic

In the Levant we have several samples of both the Neolithic and Natufian population, but from the Zagros in Iran, we possess a single individual of probable Mesolithic date (Iran\_HotuIIIb; see Supplementary Information, section 1 for discussion regarding the uncertainty about its date) from Hotu Cave. This makes inferences about population continuity or change in this region more tentative. However, it is clear from PCA and ADMIXTURE analyses that the Neolithic of Iran from Ganj Dareh clusters closely with the likely Mesolithic individual (Fig. 1). Both are strikingly different from all Levantine individuals and cluster more remotely with later Chalcolithic samples from Iran, Chalcolithic and Bronze Age Armenians, and the recently described Caucasus Hunter-Gatherers (CHG) from Georgia.

In Fig. S7.4 we plot the statistic  $f_4(\text{Test}, \text{Iran\_HotuIIIb}; \text{Iran\_N}, \text{Chimp})$ . Iran\_N shares significantly more alleles with the Mesolithic of Iran than with most other populations in our dataset, consistent with the two populations clustering in PCA (Fig. 1b). For some populations there is no significant difference, including the pre-agricultural Caucasus hunter-gatherers (CHG) that as we will see below can be modeled as having most of their ancestry from a population like Iran\_N, and later populations from Iran. This parallels Fig. S7.2 for the Levant in demonstrating a degree of continuity in the region.

In Fig. S7.5 we plot the statistic  $f_4(\text{Iran\_HotuIIIb}, \text{Iran\_N}; \text{Test}, \text{Chimp})$ . If Iran\_N is derived from Iran\_HotuIIIb by admixture with another population, then a negative statistic of the above form might help identify surrogates for that population. However, we do not observe any such statistics, but rather a couple of statistics that are borderline significantly positive ( $Z > 3$ ), involving the EHG and the related Eneolithic Steppe population also from eastern Europe and the related MA1 sample from Upper Paleolithic Siberia ( $Z = 2.8$ ). Thus it is rather the Mesolithic of Iran that shares more alleles with these eastern European groups than the Neolithic. Tentatively, this might suggest that the pre-Neolithic population of Iran had an affinity to the EHG/Ancient North Eurasians that was diluted during the Neolithic, although the lack of negative  $f_4$ -statistics does not allow us to discern what is the source of this dilution. Alternatively, there was no dilution, but the Neolithic of Iran was descended from an unsampled Mesolithic population.

We also searched more broadly by allowing *Test* to include any present-day population in the *HO* dataset, but do not find any significantly negative statistics ( $Z > -1.1$ ). Moreover, we also do not find any negative  $f_3$ -statistics with the Iran Neolithic as a target for any reference pair of ancient populations in the *HOIII* dataset ( $Z > -1$ ) or ancient/present-day populations in the *HO* dataset ( $Z > -1.1$ ). Thus, it seems that the Neolithic of Iran represents an “extreme” population which cannot be modeled as a mixture of other populations in our dataset, consistent also with its position in the PCA (Fig. 1b) well outside the variation of any other populations.

The origin of the Neolithic of Iran does not appear to be related to either Anatolia or the Levant, as the Neolithic and Mesolithic of Iran are symmetrically related to either population (Fig. S7.5), providing no evidence for gene flow from either region into the Zagros, but hinting strongly that whatever role the exchange of ideas and technology may have played in the emergence of the Neolithic in the Zagros, this was not accompanied with any substantial gene flow from other ancient Near Eastern Neolithic centers of domestication.

We can model Iran\_HotuIIIb as  $90.6 \pm 4.4\%$  Iran\_N and  $9.4 \pm 4.4\%$  EHG, with O9ALNW as outgroups (P-value for rank=1 is 0.45). Additional and better data from pre-Neolithic individuals from the Zagros may clarify the population composition of its late inhabitants prior to the appearance of agriculture.

**Figure S7.4: Testing whether the Neolithic of Iran shares more alleles with the Mesolithic of Iran or with another *Test* population with the statistic  $f_4(\text{Test}, \text{Iran\_HotuIIIb}; \text{Iran\_N}, \text{Chimp})$ .**

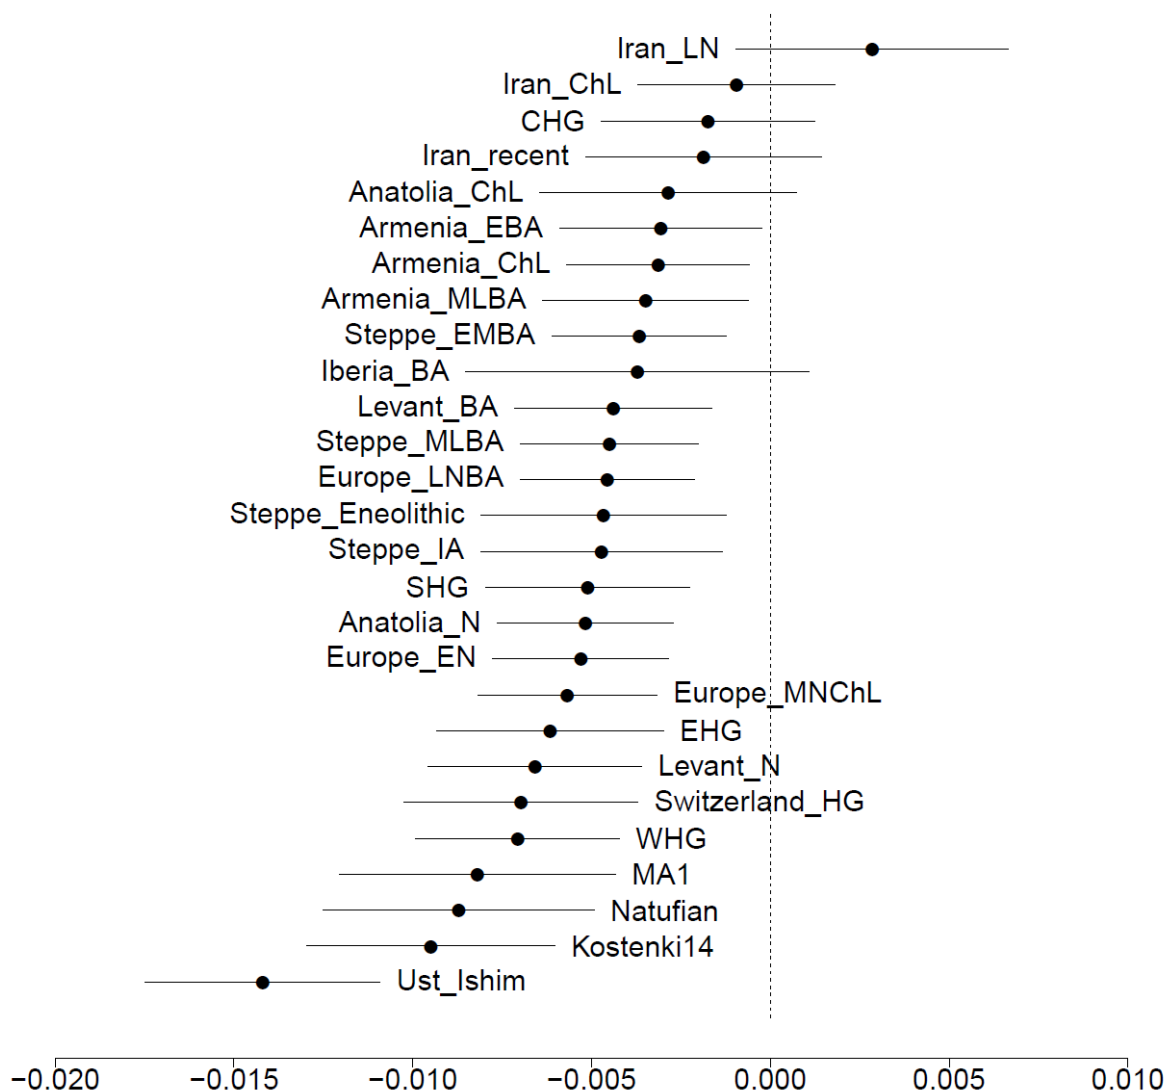

Figure S7.5: Testing for symmetry between the Mesolithic and Neolithic of Iran with the statistic  $f_4(\text{Iran\_HotuIIIb}, \text{Iran\_N}; \text{Test}, \text{Chimp})$ .

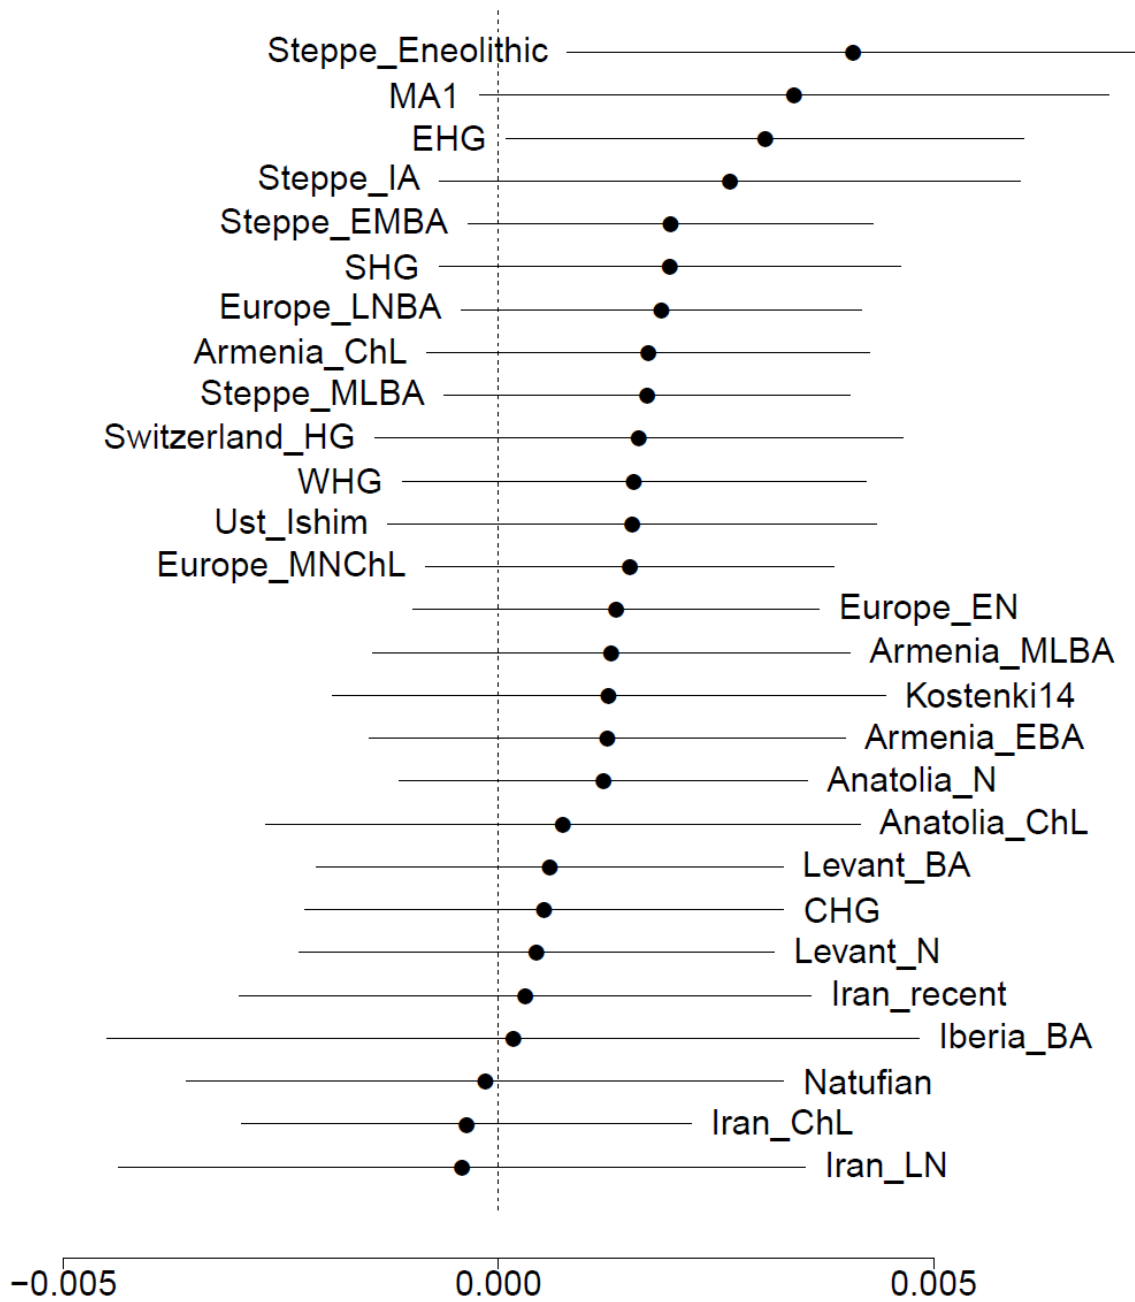

### Caucasus hunter-gatherers can be modeled as a mixture of Neolithic Europe and European hunter-gatherers

The Caucasus hunter-gatherers cluster with the Iran\_N in PCA (Fig. 1b), but are also shifted towards Europe. We verify with  $f_4$ -statistics that the CHG and Iran\_N do not form a clade, but rather that most ancient West Eurasian populations share more alleles with the CHG than with the Iran\_N (Fig. S7.6). Some of these statistics could be interpreted in terms of gene flow into Europe, associated with the migration of the Yamnaya that included a component from the Caucasus<sup>1</sup>, for which the CHG could be a representative<sup>16</sup>. However, similar to the argument we previously made for the relationship of the Levantine Neolithic to Natufians, the positive  $f_4$ -statistics that involve European hunter-gatherers or even MA1 cannot be explained in this manner (as they predate the Yamnaya by thousands of years).

An alternative explanation is that the excess of genetic drift shared by the CHG and European hunter-gatherers is caused by the Iran\_N having more Basal Eurasian ancestry than the CHG. The statistic  $f_4(\text{CHG}, \text{Iran}_N; \text{Ust\_Ishim}, \text{Chimp}) = 0.00145$  ( $Z=2.8$ ; 762,778 SNPs) is suggestive that this is the case. The same could be the case for the Iran\_HotuIIIb population, which is similar in magnitude, but on a much lower number of SNPs:  $f_4(\text{Iran\_HotuIIIb}, \text{Iran}_N; \text{Ust\_Ishim}, \text{Chimp}) = 0.00154$  ( $Z=1.6$ ; 116,123 SNPs).

**Table S7.6: No strong evidence that allele frequency differences between CHG and Iran\_N are strongly associated with a particular ancient West Eurasian hunter-gatherer population.**

| HG <sub>1</sub> | HG <sub>2</sub> | $f_4(\text{CHG}, \text{Iran}_N; \text{HG}_1, \text{HG}_2)$ | Z    | Number of SNPs |
|-----------------|-----------------|------------------------------------------------------------|------|----------------|
| WHG             | EHG             | 0.00068                                                    | 1.5  | 448526         |
| WHG             | SHG             | 0.00101                                                    | 3.0  | 451422         |
| WHG             | Switzerland_HG  | 0.00039                                                    | 0.9  | 462807         |
| WHG             | MA1             | 0.00106                                                    | 1.8  | 337136         |
| WHG             | Kostenki14      | 0.00157                                                    | 3.0  | 434510         |
| EHG             | SHG             | 0.00032                                                    | 0.8  | 440232         |
| EHG             | Switzerland_HG  | -0.00037                                                   | -0.7 | 448141         |
| EHG             | MA1             | 0.00056                                                    | 0.9  | 326727         |
| EHG             | Kostenki14      | 0.00110                                                    | 1.9  | 420881         |
| SHG             | Switzerland_HG  | -0.00067                                                   | -1.5 | 451050         |
| SHG             | MA1             | -0.00004                                                   | -0.1 | 328854         |
| SHG             | Kostenki14      | 0.00064                                                    | 1.2  | 423710         |
| Switzerland_HG  | MA1             | 0.00103                                                    | 1.5  | 336886         |
| Switzerland_HG  | Kostenki14      | 0.00133                                                    | 2.2  | 434174         |
| MA1             | Kostenki14      | 0.00085                                                    | 1.2  | 316733         |



There does not appear to be any evidence that the difference between CHG and Iran\_N is strongly correlated with any particular European hunter-gatherer population (Table S7.6), with the only two comparisons that reach significant ( $|Z|=3$ ) hinting that CHG shares more alleles with WHG than with SHG or Kostenki14. We can model CHG as a mixture of Iran\_N and different European hunter-gatherer populations (Table S7.7), with an estimate of  $71.6\pm 6.0\%$  Iran\_N,  $7.0\pm 3.8\%$  WHG,  $21.4\pm 7.7\%$  EHG. A sanity check of this estimate is that it predicts  $0.716 * .482 = 0.345$  Basal Eurasian ancestry in the CHG, virtually identical to the  $0.347\pm 0.058$  of Supplementary Information, section 4.

**Figure S7.6: Testing for symmetry between the CHG and the Neolithic of Iran with the statistic  $f_4(\text{CHG}, \text{Iran}_N; \text{Test}, \text{Chimp})$ .**

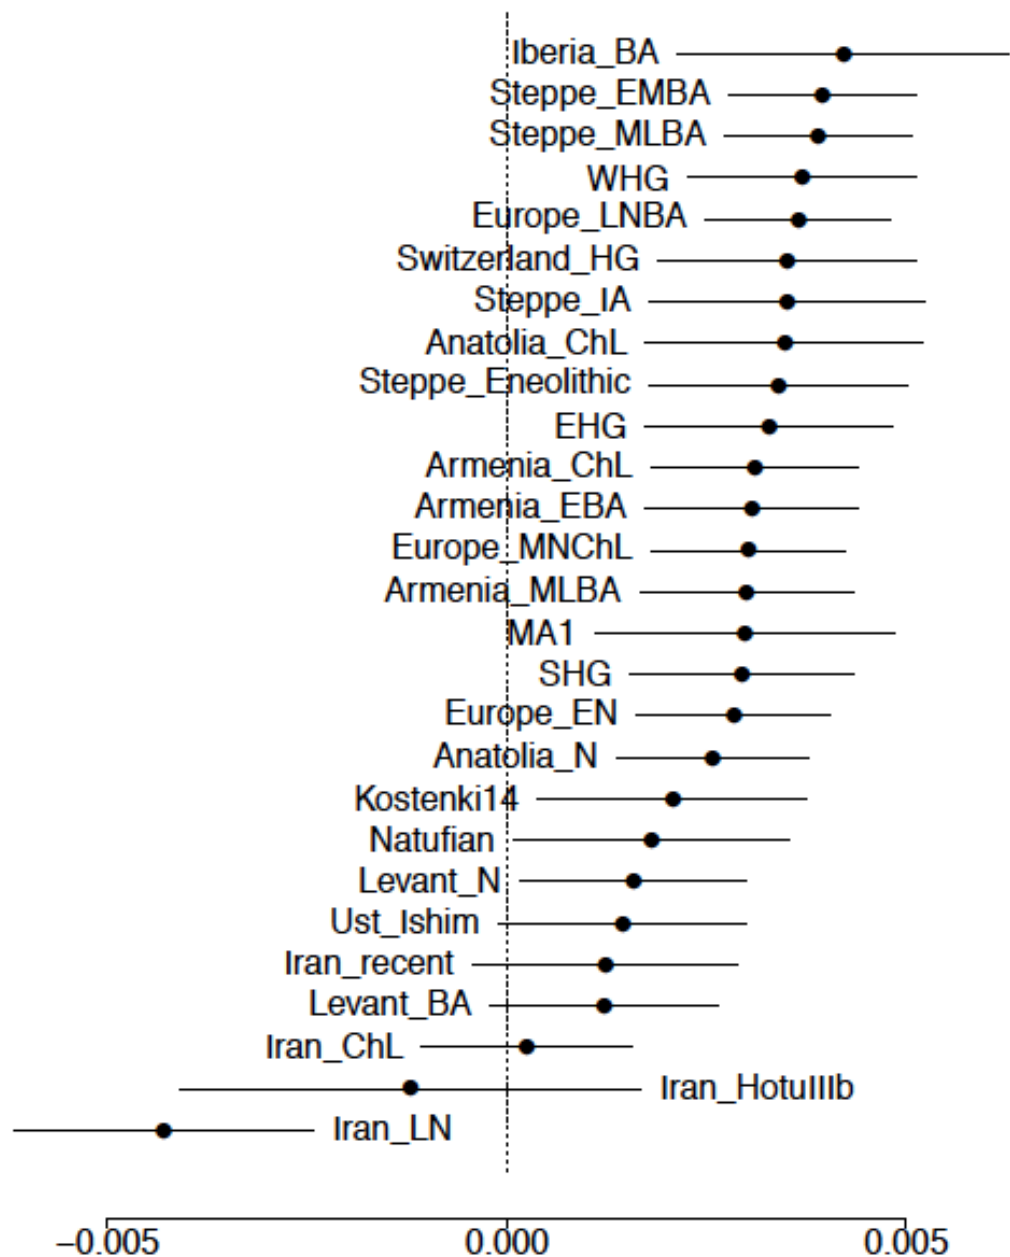

**Table S7.7: Modeling CHG.** CHG can be modeled as a mixture of Iran\_N and European hunter-gatherers with the Neolithic Levant and Natufians as outgroups, but not with the Anatolian Neolithic as an outgroup.

| <b>A</b>        | <b>Right</b> | P for rank=1    | Iran_N              | Mixture Proportions |              |              | Std. Error   |              |       |
|-----------------|--------------|-----------------|---------------------|---------------------|--------------|--------------|--------------|--------------|-------|
|                 |              |                 |                     | A                   |              |              |              |              |       |
| EHG             | O9N          | 1.35E-01        | 0.852               |                     |              | 0.148        |              |              | 0.033 |
| EHG             | O9LN         | 8.67E-02        | 0.867               |                     |              | 0.133        |              |              | 0.032 |
| EHG             | O9ALN        | 7.62E-05        | 0.894               |                     |              | 0.106        |              |              | 0.033 |
| SHG             | O9N          | 5.80E-01        | 0.731               |                     |              | 0.269        |              |              | 0.048 |
| SHG             | O9LN         | 5.92E-01        | 0.734               |                     |              | 0.266        |              |              | 0.048 |
| SHG             | O9ALN        | 3.89E-02        | 0.713               |                     |              | 0.287        |              |              | 0.049 |
| Switzerland_HG  | O9N          | 9.87E-02        | 0.694               |                     |              | 0.306        |              |              | 0.075 |
| Switzerland_HG  | O9LN         | 8.05E-02        | 0.713               |                     |              | 0.287        |              |              | 0.076 |
| Switzerland_HG  | O9ALN        | 1.99E-03        | 0.678               |                     |              | 0.322        |              |              | 0.083 |
| WHG             | O9N          | 1.97E-01        | 0.700               |                     |              | 0.300        |              |              | 0.062 |
| WHG             | O9LN         | 2.50E-01        | 0.700               |                     |              | 0.300        |              |              | 0.062 |
| WHG             | O9ALN        | 3.32E-02        | 0.655               |                     |              | 0.345        |              |              | 0.061 |
|                 |              |                 | Mixture Proportions |                     |              | Std. Errors  |              |              |       |
|                 |              | P for rank=2    | Iran_N              | WHG                 | EHG          | Iran_N       | WHG          | EHG          |       |
| <b>WHG, EHG</b> | <b>O9LN</b>  | <b>4.52E-01</b> | <b>0.716</b>        | <b>0.070</b>        | <b>0.214</b> | <b>0.060</b> | <b>0.038</b> | <b>0.077</b> |       |
| WHG, EHG        | O9ALN        | 2.42E-02        | 0.659               | 0.025               | 0.316        | 0.061        | 0.036        | 0.076        |       |

### The Anatolian Neolithic

In the Levant and Iran we have Epipalaeolithic/Mesolithic samples and can thus compare the first Neolithic populations with the hunter-gatherers that preceded them. There are currently no samples of Epipalaeolithic Anatolians, but we observe that the Neolithic Anatolians are genetically shifted towards Europe in the PCA (Fig. 1b) and have ancestry from an ancestral population related to European hunter-gatherers according to ADMIXTURE analysis (Fig. 1c). This should not be interpreted as evidence of ancestry from actual hunter-gatherers from Europe; while this is not implausible for our sample from Northwestern Anatolia<sup>17</sup>, we have previously seen that populations of the ancient Near East are also differentially related to European hunter-gatherers. This suggests that populations related to European hunter-gatherers existed in the Near East and may be included in the Epipalaeolithic/Mesolithic ancestors of the Neolithic Anatolians without any need for a direct migration from Europe.

First, to understand how Neolithic Anatolians differ from the other two Neolithic Near Eastern populations we study  $f_4$ -statistics (Fig. S7.7, 8) of the form  $f_4(\text{Anatolia\_N, Levant\_N or Iran\_N; Test, Chimp})$  that demonstrate that Europeans share more alleles with the Anatolians than with the other two. This could be ascribed to the later Europeans having ancestry from Anatolia, but cannot account for the positive statistics of the above form when *Test* is a European hunter-gatherer population

(before any Neolithic migrations), including the ~13,000 year old Switzerland\_HG<sup>16</sup>, or the ~37,000 year old Kostenki14<sup>4</sup>. Thus, the greater affinity of Anatolia\_N to European hunter-gatherer populations cannot be attributed to gene flow from Anatolia to Europe related to the Neolithization of the continent, or indeed to earlier possible gene flows that affected only post-glacial or Holocene-era European hunter-gatherers.

**Figure S7.7: Statistics of the form  $f_4(\text{Anatolia\_N}, \text{Levant\_N}; \text{Test}, \text{Chimp})$**

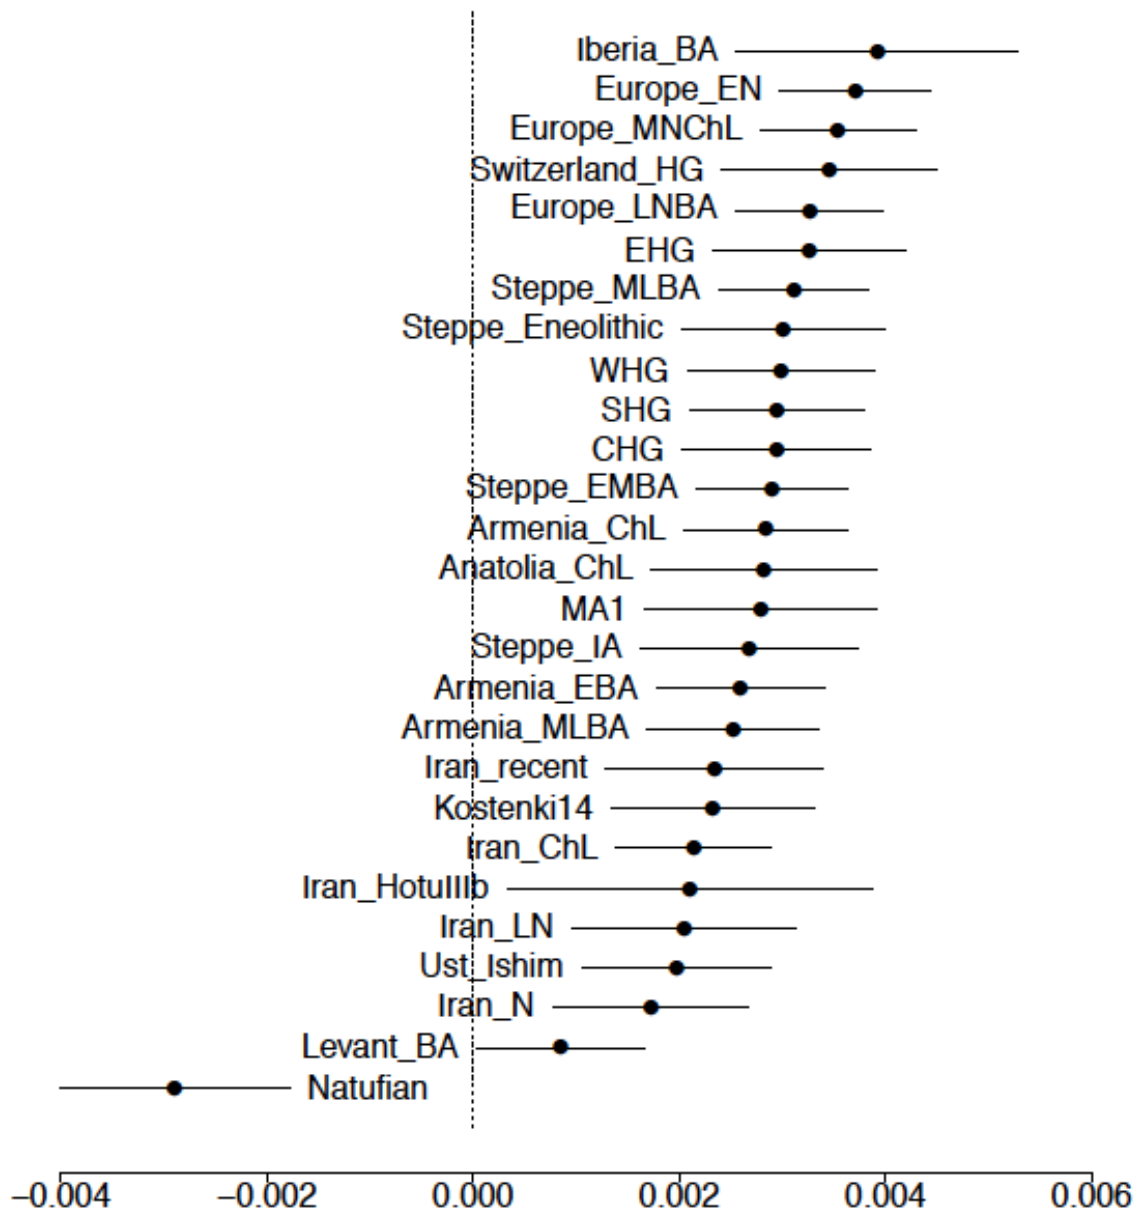

Figure S7.8: Statistics of the form  $f_4(\text{Anatolia\_N}, \text{Iran\_N}; \text{Test}, \text{Chimp})$

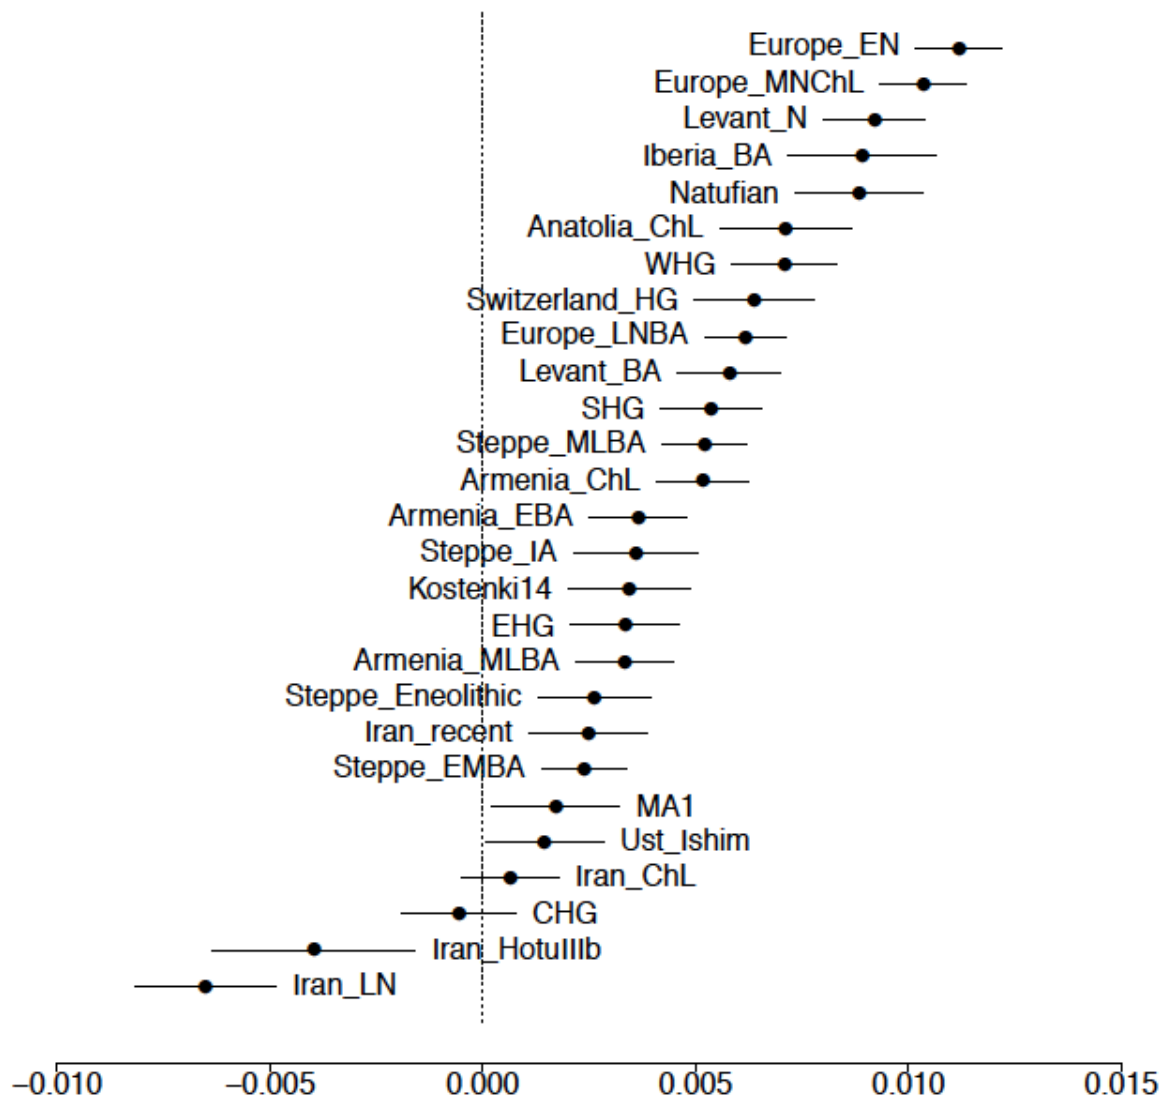

We modeled the Anatolian Neolithic as a 4-way mixture of the Four (Table S7.3), but with a negative inferred mixture proportion from EHG. We tried to model it as a simpler 3-way mixture (Table S7. 8), by dropping each of the Four in turn. All the simpler 3-way mixtures are rejected strongly ( $P < 0.0001$ ) except the one involving Neolithic Iran, Neolithic Levant, and WHG ( $P = 0.0171$ ), also suggesting that EHG is the population that does not contribute to the Anatolian Neolithic. In Supplementary Information section 10, we give an interpretation of the origin of the Anatolian Neolithic that interprets the negative EHG mixture proportion (Table S7.3) in terms of admixture (into the Anatolian Neolithic) of a population that is not exactly WHG, but rather residing on the EHG→WHG cline beyond WHG.

**Table S7.8: Modeling Anatolian Neolithic as a 3-way mixture.** We move each of the Four from the set of reference populations (Table S7.3) into the Right set and test rank=2 for Left=(Anatolia\_N, A, B, C). Rank=2 is strongly rejected for all (A, B, C) triples ( $P < 1E-07$ ) except (Iran\_N, Levant\_N, WHG) ( $P = 0.0171$ ).

| A             | B               | C          | Right      | P for rank=2    | Mixture Proportions |              |              | Standard Errors |              |              |
|---------------|-----------------|------------|------------|-----------------|---------------------|--------------|--------------|-----------------|--------------|--------------|
|               |                 |            |            |                 | A                   | B            | C            | A               | B            | C            |
| Iran_N        | EHG             | WHG        | O9         | 9.03E-02        | 0.67                | -0.113       | 0.444        | 0.048           | 0.033        | 0.065        |
| Iran_N        | EHG             | WHG        | O9L        | 2.64E-36        | 4.896               | 0.386        | 4.282        | 8.096           | 2.412        | 10.473       |
| Iran_N        | Levant_N        | EHG        | O9         | 1.24E-04        | -75.741             | 70.136       | 6.605        | 26.641          | 24.354       | 2.306        |
| Iran_N        | Levant_N        | EHG        | O9W        | 2.03E-10        | -0.281              | 1.155        | 0.126        | 0.088           | 0.094        | 0.024        |
| Iran_N        | Levant_N        | WHG        | O9         | 4.14E-02        | 0.251               | 0.43         | 0.32         | 0.148           | 0.136        | 0.029        |
| <b>Iran_N</b> | <b>Levant_N</b> | <b>WHG</b> | <b>O9E</b> | <b>1.71E-02</b> | <b>0.387</b>        | <b>0.339</b> | <b>0.274</b> | <b>0.134</b>    | <b>0.137</b> | <b>0.021</b> |
| Levant_N      | EHG             | WHG        | O9         | 2.11E-02        | 0.638               | -0.042       | 0.404        | 0.033           | 0.026        | 0.051        |
| Levant_N      | EHG             | WHG        | O9I        | 2.17E-08        | 0.742               | -0.015       | 0.273        | 0.032           | 0.03         | 0.053        |

### SHG, Europe\_EN, Europe\_MNChL, Europe\_LNBA

The admixture history of mainland European Neolithic and Bronze Age populations has been recently discussed<sup>1,6,17</sup> and we confirm here the main findings of these earlier studies in the present context (Table S7.9). The Scandinavian hunter-gatherers (SHG) can be modeled as a mixture of WHG and EHG<sup>1</sup>. Early and Middle/Neolithic populations are modeled as a mixture of Anatolian Neolithic and WHG, with more hunter-gatherer ancestry in the Middle Neolithic/Chalcolithic populations<sup>1,17</sup>. Populations of the Late Neolithic/Bronze Age can be modeled as mixtures of the preceding Middle Neolithic/Chalcolithic populations and populations from the Early to Middle Bronze Age from the steppe<sup>1,17</sup>.

**Table S7.9: Modeling European populations with the O9 outgroups.**

| <i>Test</i>  | <b>A</b>     | <b>B</b>    | <b>P for rank=1</b> | <b>Mixture Proportions</b> |          |                   |
|--------------|--------------|-------------|---------------------|----------------------------|----------|-------------------|
|              |              |             |                     | <b>A</b>                   | <b>B</b> | <b>Std. Error</b> |
| SHG          | EHG          | WHG         | 1.38E-01            | 0.429                      | 0.571    | 0.030             |
| Europe_EN    | Anatolia_N   | WHG         | 2.50E-01            | 0.929                      | 0.071    | 0.023             |
| Europe_MNChL | Anatolia_N   | WHG         | 1.15E-01            | 0.779                      | 0.221    | 0.028             |
| Europe_LNBA  | Europe_MNChL | Steppe_EMBA | 2.37E-01            | 0.469                      | 0.531    | 0.016             |

**Steppe\_EMBA**

It has been observed that while the Yamnaya populations from the Early Bronze Age steppe were carriers of Ancient North Eurasian ancestry into Europe, they had less of it than the preceding EHG<sup>1</sup>. The timeline of the “dilution of EHG ancestry” on the steppe was further clarified by the discovery that during the Eneolithic period the reduction of EHG ancestry had already begun<sup>17</sup>. The best surrogate for the population effecting this dilution was present-day Armenians<sup>1,17</sup>, and a recent study has identified the CHG as an ancient population that could function as a source for the southern component in the ancestry of the Yamnaya. It has been observed that the Yamnaya<sup>1,14</sup>, Afanasievo<sup>14</sup>, and Middle Bronze Age Poltavka<sup>17</sup> culture formed a tight genetic cluster which we name here Steppe\_EMBA.

In Fig. S7.9 we show that there are negative  $f_4(\text{EHG}, \text{Steppe\_EMBA}; A, \text{Chimp})$  statistics when  $A$  is a population of Near Eastern ancestry and positive ones when  $A$  is a European hunter-gatherer population, documenting the dilution of EHG ancestry from a Near Eastern source. Direct evidence that this is due to admixture is provided by the negative  $f_3(\text{Steppe\_EMBA}; \text{EHG}, A)$  statistic (Fig. S7.10) when  $A$  is a Near Eastern source, with the CHG and populations of Iran providing the most negative statistics.

We verify that we can model the Steppe\_EMBA as a mix of EHG and Near Eastern populations from the Caucasus, Armenia, and Iran (Table S7.10). We further test the plausible sources by adding outgroups to the Right set (Table S7.11). When we add Anatolia\_N, Levant\_N, Natufians, and WHG as additional outgroups, rank=1 is rejected for all populations ( $P < .001$ ) except the Chalcolithic of Iran ( $P = 0.057$ ) and the recent individual from Ganj Dareh ( $P = 0.205$ ) that clusters with Chalcolithic Iran and ancient Armenia rather than the much older Neolithic individuals from Ganj Dareh (Iran\_recent; Fig. 1b). We do not at present know the geographical distribution of populations like the Chalcolithic of Iran in the ancient Near East and the source of ancestry in the steppe could be from a geographically more proximate source in the Caucasus. This may be clarified with additional sampling, but it is important to note that regardless of the choice for the Near Eastern population, a relatively stable estimate of ~50/50% ancestry from the EHG and the Near East is inferred.

Figure S7.9: Testing for symmetry between EHG and Steppe\_EMBA with the statistic  $f_4(\text{EHG}, \text{Steppe\_EMBA}; A, \text{Chimp})$

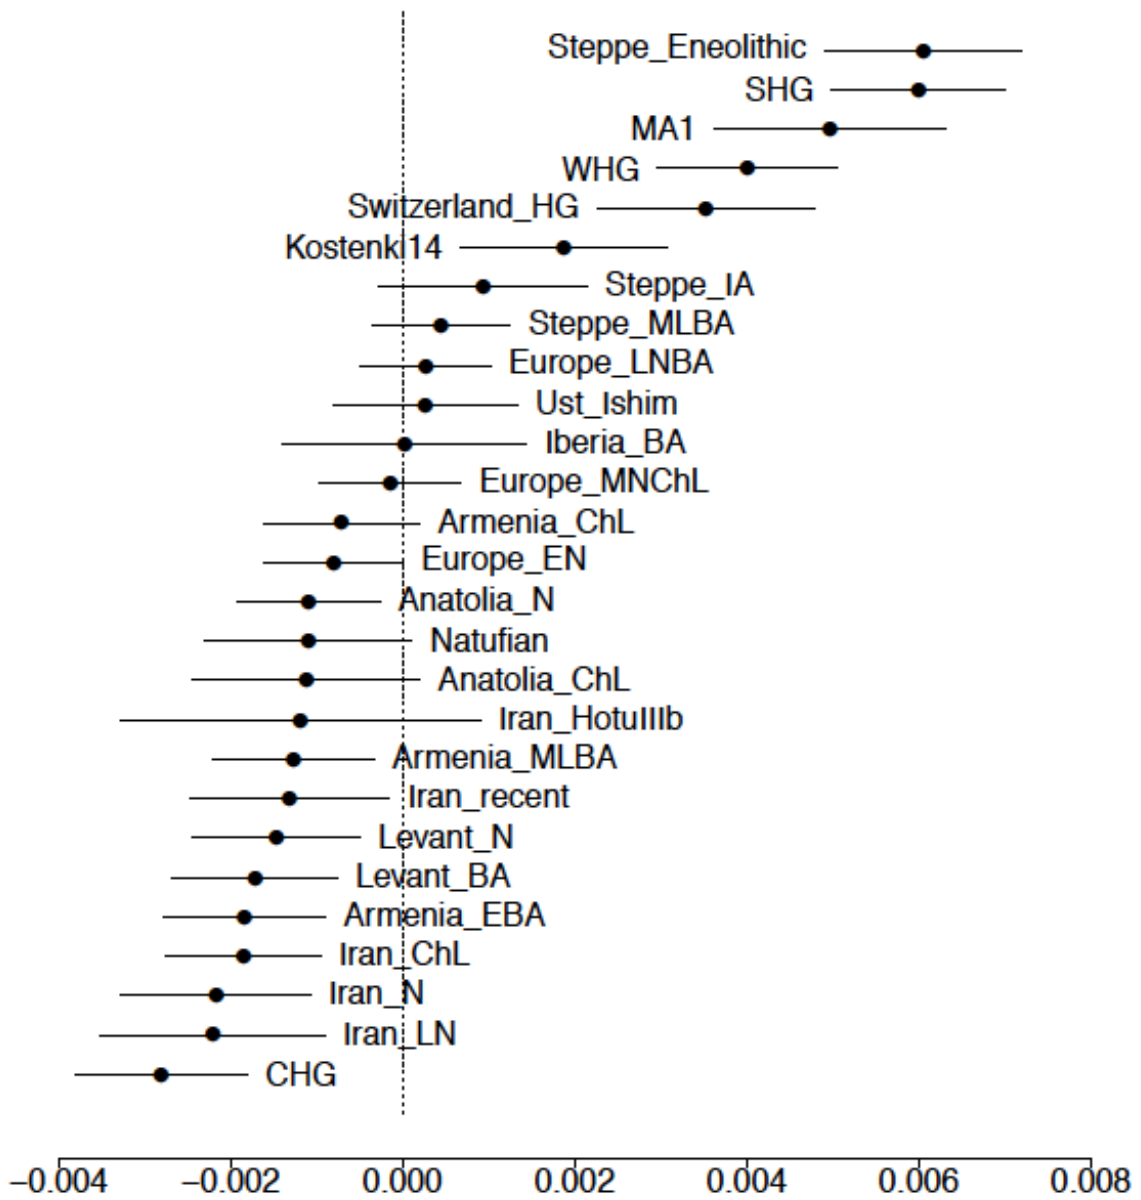

Figure S7.10: Testing for admixture in Steppe\_EMBA with the statistic  $f_3(\text{Steppe\_EMBA}; \text{EHG}, A)$

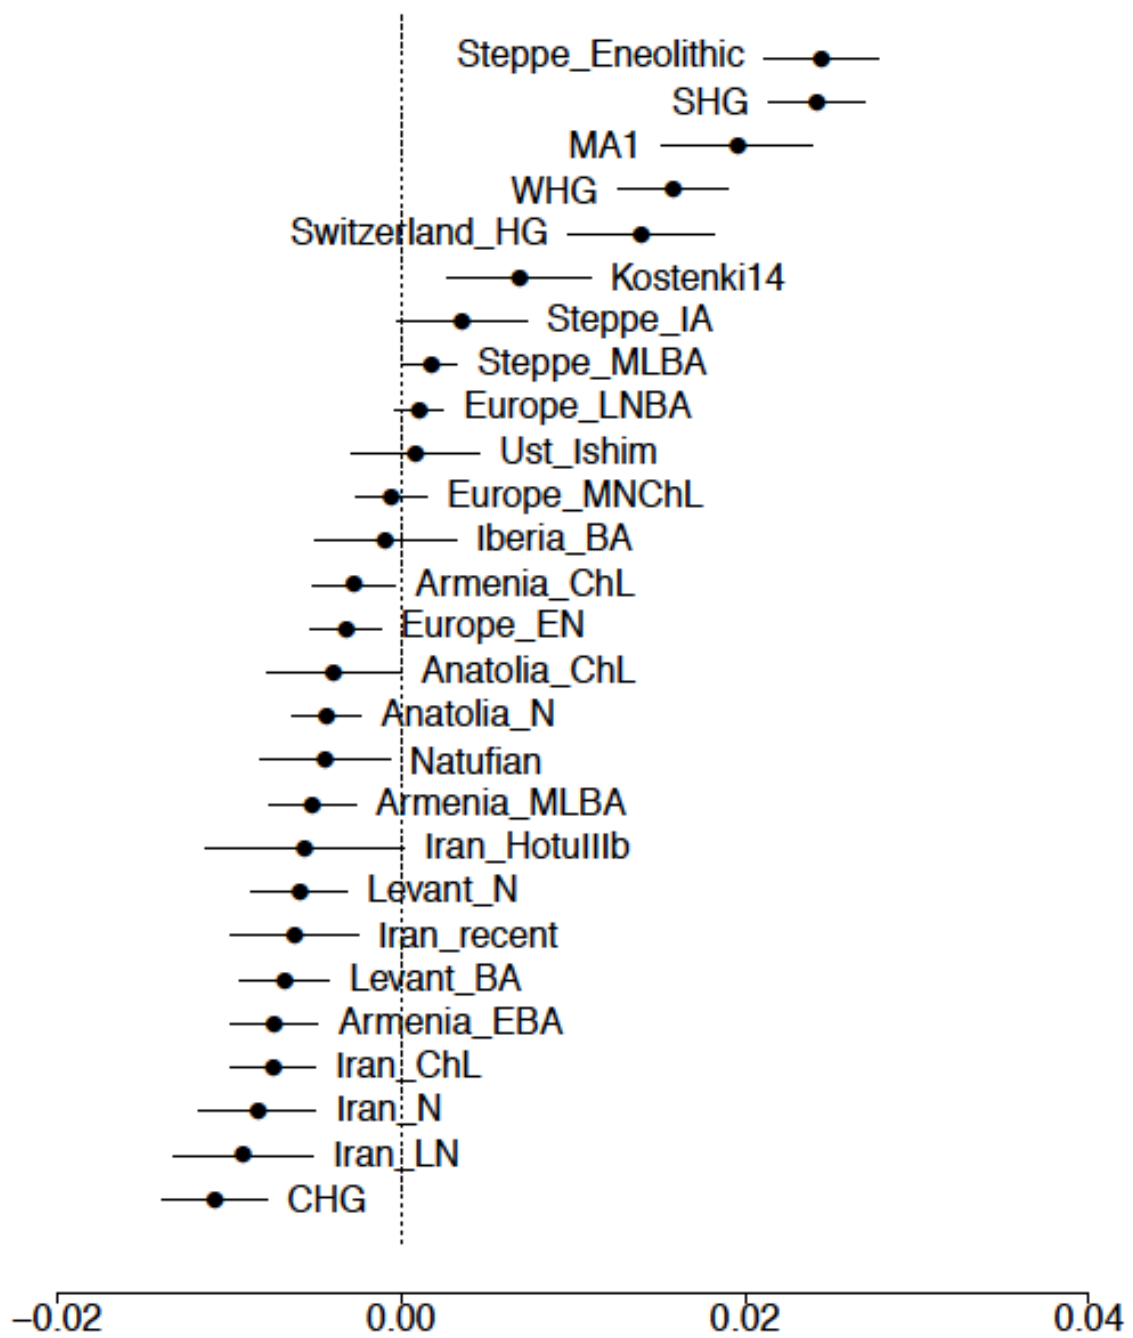



**Table S7.10: Modeling Steppe\_EMBA as a mix of EHG and a population *A*.** When *A* is one of several populations from the Caucasus, Armenia, and Iran, the Left=(Steppe\_EMBA, EHG, *A*) is related to O9 with 2 streams of ancestry.

| <b>A</b>          | <b>Right</b> | <b>P for rank=1</b> | <b>Mixture Proportions</b> |          |                   |
|-------------------|--------------|---------------------|----------------------------|----------|-------------------|
|                   |              |                     | <b>EHG</b>                 | <b>A</b> | <b>Std. Error</b> |
| Anatolia_ChL      | O9           | 1.76E-03            | 0.511                      | 0.489    | 0.026             |
| Anatolia_N        | O9           | 5.08E-04            | 0.562                      | 0.438    | 0.018             |
| Armenia_ChL       | O9           | 2.40E-02            | 0.439                      | 0.561    | 0.022             |
| Armenia_EBA       | O9           | 1.35E-01            | 0.508                      | 0.492    | 0.020             |
| Armenia_MLBA      | O9           | 3.50E-01            | 0.451                      | 0.549    | 0.021             |
| CHG               | O9           | 3.82E-01            | 0.500                      | 0.500    | 0.021             |
| Europe_EN         | O9           | 3.97E-04            | 0.550                      | 0.450    | 0.018             |
| Europe_LNBA       | O9           | 9.21E-04            | 0.346                      | 0.654    | 0.020             |
| Europe_MNChL      | O9           | 3.86E-05            | 0.532                      | 0.468    | 0.019             |
| Iberia_BA         | O9           | 4.53E-02            | 0.441                      | 0.559    | 0.031             |
| Iran_ChL          | O9           | 1.02E-01            | 0.535                      | 0.465    | 0.019             |
| Iran_LN           | O9           | 2.95E-01            | 0.588                      | 0.412    | 0.021             |
| Iran_Hotulllb     | O9           | 2.22E-02            | 0.508                      | 0.492    | 0.034             |
| Iran_N            | O9           | 3.65E-02            | 0.579                      | 0.421    | 0.021             |
| Iran_recent       | O9           | 2.74E-01            | 0.513                      | 0.487    | 0.023             |
| Levant_BA         | O9           | 8.95E-04            | 0.588                      | 0.412    | 0.018             |
| Levant_N          | O9           | 6.30E-07            | 0.630                      | 0.370    | 0.018             |
| Natufian          | O9           | 5.15E-05            | 0.657                      | 0.343    | 0.019             |
| SHG               | O9           | 4.42E-13            | -0.048                     | 1.048    | 0.066             |
| Steppe_Eneolithic | O9           | 4.46E-02            | -0.955                     | 1.955    | 0.269             |
| Steppe_IA         | O9           | 2.29E-08            | 0.183                      | 0.817    | 0.055             |
| Steppe_MLBA       | O9           | 2.05E-02            | 0.253                      | 0.747    | 0.021             |
| Switzerland_HG    | O9           | 5.71E-17            | 0.471                      | 0.529    | 0.037             |
| WHG               | O9           | 4.66E-26            | 0.466                      | 0.534    | 0.042             |

**Table S7.11: Modeling Steppe\_EMBA as EHG and a population *A*.** We add Natufians, WHG, Levant\_N, and Anatolia\_N as outgroups to the Right set and test whether the triple (Steppe\_EMBA, EHG, *A*) could be related via 2 streams of ancestry from the Right set.

| <b>A</b>           | <b>Right</b>  | <b>P for rank=1</b> | <b>Mixture Proportions</b> |              |                   |
|--------------------|---------------|---------------------|----------------------------|--------------|-------------------|
|                    |               |                     | <b>EHG</b>                 | <b>A</b>     | <b>Std. Error</b> |
| Armenia_EBA        | O9N           | 6.59E-03            | 0.535                      | 0.465        | 0.019             |
| Armenia_EBA        | O9W           | 4.03E-02            | 0.491                      | 0.509        | 0.018             |
| Armenia_EBA        | O9NW          | 1.83E-03            | 0.518                      | 0.482        | 0.017             |
| Armenia_EBA        | O9ANW         | 7.54E-06            | 0.563                      | 0.437        | 0.012             |
| Armenia_EBA        | O9LNW         | 1.24E-04            | 0.542                      | 0.458        | 0.015             |
| Armenia_EBA        | O9ALNW        | 1.37E-05            | 0.564                      | 0.436        | 0.012             |
| Armenia_MLBA       | O9N           | 6.13E-03            | 0.477                      | 0.523        | 0.021             |
| Armenia_MLBA       | O9W           | 1.99E-01            | 0.435                      | 0.565        | 0.019             |
| Armenia_MLBA       | O9NW          | 3.61E-03            | 0.461                      | 0.539        | 0.018             |
| Armenia_MLBA       | O9ANW         | 1.89E-04            | 0.496                      | 0.504        | 0.014             |
| Armenia_MLBA       | O9LNW         | 6.14E-04            | 0.481                      | 0.519        | 0.016             |
| Armenia_MLBA       | O9ALNW        | 2.73E-04            | 0.498                      | 0.502        | 0.014             |
| CHG                | O9N           | 9.03E-02            | 0.488                      | 0.512        | 0.022             |
| CHG                | O9W           | 3.52E-01            | 0.513                      | 0.487        | 0.019             |
| CHG                | O9NW          | 8.48E-02            | 0.501                      | 0.499        | 0.019             |
| CHG                | O9ANW         | 3.08E-05            | 0.459                      | 0.541        | 0.017             |
| CHG                | O9LNW         | 9.93E-03            | 0.482                      | 0.518        | 0.017             |
| CHG                | O9ALNW        | 6.21E-05            | 0.458                      | 0.542        | 0.017             |
| Iran_ChL           | O9N           | 9.75E-02            | 0.543                      | 0.457        | 0.018             |
| Iran_ChL           | O9W           | 1.39E-01            | 0.541                      | 0.459        | 0.016             |
| Iran_ChL           | O9NW          | 1.33E-01            | 0.548                      | 0.452        | 0.015             |
| Iran_ChL           | O9ANW         | 8.58E-02            | 0.565                      | 0.435        | 0.012             |
| Iran_ChL           | O9LNW         | 3.78E-02            | 0.566                      | 0.434        | 0.014             |
| <b>Iran_ChL</b>    | <b>O9ALNW</b> | <b>5.70E-02</b>     | <b>0.568</b>               | <b>0.432</b> | <b>0.012</b>      |
| Iran_LN            | O9N           | 2.31E-01            | 0.580                      | 0.420        | 0.020             |
| Iran_LN            | O9W           | 2.67E-01            | 0.601                      | 0.399        | 0.018             |
| Iran_LN            | O9NW          | 2.14E-01            | 0.593                      | 0.407        | 0.017             |
| Iran_LN            | O9ANW         | 5.66E-06            | 0.548                      | 0.452        | 0.016             |
| Iran_LN            | O9LNW         | 4.54E-02            | 0.578                      | 0.422        | 0.016             |
| Iran_LN            | O9ALNW        | 9.59E-06            | 0.549                      | 0.451        | 0.016             |
| Iran_recent        | O9N           | 2.89E-01            | 0.520                      | 0.480        | 0.022             |
| Iran_recent        | O9W           | 2.65E-01            | 0.502                      | 0.498        | 0.021             |
| Iran_recent        | O9NW          | 2.83E-01            | 0.508                      | 0.492        | 0.020             |
| Iran_recent        | O9ANW         | 1.74E-01            | 0.529                      | 0.471        | 0.015             |
| Iran_recent        | O9LNW         | 1.91E-01            | 0.523                      | 0.477        | 0.017             |
| <b>Iran_recent</b> | <b>O9ALNW</b> | <b>2.05E-01</b>     | <b>0.531</b>               | <b>0.469</b> | <b>0.015</b>      |

We were intrigued by the fact that populations from Iran were a better fit for the population admixing into the steppe than the CHG, so we examined  $f_4(\text{Steppe\_EMBA}, \text{Fitted Steppe\_EMBA}; \text{Ust\_Ishim}, \text{Outgroup})$  to see what interaction with the outgroups is causing better fit in Iran\_ChL than in CHG when Anatolian and Levantine Neolithic are included in the outgroups (Table S7.11).

**Table S7.12: Value of the statistic  $f_4(\text{Steppe\_EMBA}, \text{Fitted Steppe\_EMBA}; \text{Ust\_Ishim}, \text{Outgroup})$ .**

|                 | <b>Fitted Steppe_EMBA</b> |          |                      |          |                              |          |
|-----------------|---------------------------|----------|----------------------|----------|------------------------------|----------|
|                 | .458EHG+.542CHG           |          | .568EHG+.432Iran_ChL |          | .527EHG+.181CHG+.292Iran_ChL |          |
| <b>Outgroup</b> | <b>Statistic</b>          | <b>Z</b> | <b>Statistic</b>     | <b>Z</b> | <b>Statistic</b>             | <b>Z</b> |
| Kostenki14      | 0.00007                   | 0.2      | 0.00050              | 1.8      | 0.00035                      | 1.3      |
| MA1             | -0.00070                  | -2.1     | 0.00042              | 1.3      | 0.00002                      | 0.1      |
| Han             | -0.00017                  | -0.7     | 0.00025              | 1.2      | 0.00010                      | 0.5      |
| Papuan          | -0.00025                  | -1.1     | 0.00008              | 0.4      | -0.00003                     | -0.1     |
| Onge            | -0.00033                  | -1.4     | 0.00002              | 0.1      | -0.00009                     | -0.5     |
| Chukchi         | -0.00024                  | -1.0     | 0.00032              | 1.4      | 0.00012                      | 0.6      |
| Karitiana       | -0.00021                  | -0.8     | 0.00066              | 2.6      | 0.00035                      | 1.5      |
| Mbuti           | 0.00011                   | 0.4      | 0.00036              | 1.6      | 0.00029                      | 1.4      |
| Anatolia_N      | -0.00077                  | -3.3     | 0.00044              | 2.0      | 0.00005                      | 0.3      |
| Levant_N        | -0.00072                  | -2.6     | 0.00066              | 2.5      | 0.00022                      | 0.9      |
| Natufian        | -0.00066                  | -2.0     | 0.00048              | 1.5      | 0.00011                      | 0.4      |
| WHG             | -0.00064                  | -2.3     | 0.00033              | 1.3      | -0.00002                     | -0.1     |

In Table S7.12 we see that when the southern population is CHG, several statistics are underestimated in the sense that the actual Steppe\_EMBA shares more genetic drift with populations like Anatolia\_N ( $Z=-3.3$ ) than predicted by the fitted model of 0.458EHG+0.542CHG (Table S7.11). While no such extreme outlier is observed when the southern population is Iran\_ChL, we nonetheless noticed that the opposite trend applies for Iran\_ChL: differences between Fitted and actual Steppe\_EMBA tend to be positive.

This led us to try one last model in which we model Steppe\_EMBA as a 3-way mix of EHG, CHG, and Iran\_ChL. The P-value for rank=2 is 0.241, so 3 streams of ancestry are consistent with the quadruple (Steppe\_EMBA, EHG, CHG, Iran\_ChL) and the fitted mixture proportions are 52.7±2.0% EHG, 18.1±7.4% CHG, 29.2±5.9% Iran\_ChL. We do not want to overemphasize this 3-way mixture model as the 2-way one is more parsimonious and consistent with the data (Table S7.11). Nonetheless the 3-way model is also plausible as it suggests an explanation for the shared genetic drift between Steppe\_EMBA and the Anatolian and Levantine Neolithic (underestimated when CHG alone is the southern population; Table S7.12), and makes geographical sense as admixture from the Near East

could have arrived on the steppe via the Caucasian isthmus where an addition of CHG ancestry could have occurred.

### Steppe\_MLBA

Beginning in the Middle Bronze age and in the Late Bronze Age a set of populations appear on the Eurasian steppe spanning both Europe, in the Srubnaya culture and in the trans-Ural steppe with the Andronovo and Sintashta cultures. These populations were descended from both the previous Yamnaya/Afanasievo/Poltavka (“Steppe\_EMBA”) population, but also Neolithic farmers from Europe. Table S7.13 shows our modeling of the Steppe\_MLBA population as a mixture of Steppe\_EMBA that preceded them on the Eurasian steppe and Europe\_MNChL who occupied Europe prior to the steppe migration into mainland Europe. The Steppe\_MLBA population thus resembles the Europe\_LNBA population (Table S7.9), being composed of similar population elements; the two overlap in PCA (Fig. 1b) and represent a continuum of populations from mainland Europe to the eastern parts of the Eurasian steppe.

**Table S7.13: Modeling Steppe\_MLBA**

| Right | P for rank=1 | Mixture Proportions |              | Std. Error |
|-------|--------------|---------------------|--------------|------------|
|       |              | Steppe_EMBA         | Europe_MNChL |            |
| O9    | 4.12E-01     | 0.684               | 0.315        | 0.021      |

### Iran\_ChL

The Chalcolithic population of Seh Gabi from Iran appears to be related to the Neolithic population from Ganj Dareh but is shifted towards Europe (Fig.1b) and occupies the northern end of the Near Eastern cline, close to the CHG, but shifted towards the Levant. Its relationship to Iran\_N is shown by the statistic  $f_4(\text{Iran\_ChL}, A; \text{Iran\_N}, \text{Chimp})$  (Fig. S7.11) and the fact that despite this relationship it does not form a strict clade with it is shown by the statistic  $f_4(\text{Iran\_N}, \text{Iran\_ChL}; A, \text{Chimp})$  (Fig. S7.12). The two observations that Neolithic Iran shares more alleles with Chalcolithic Iran than with any other population outside Iran, but populations outside Iran share more alleles with Chalcolithic than Neolithic Iran, are suggestive that Iran\_ChL is a population of mixed ancestry, having both a local (Iran\_N) source but also at least one second source related to populations outside Iran. This is confirmed directly via statistics of the form  $f_3(\text{Iran\_ChL}; \text{Iran\_N}, A)$  (Fig. S7.13) which show that significantly negative statistics are produced for several populations  $A$ .

We first test  $\text{Left}=(\text{Iran\_ChL}, \text{Iran\_N}, A)$  to determine if Iran\_ChL could be modeled as a simple 2-way mixture of Iran\_N and another population  $A$  (Table S7.14). While many populations  $A$  are consistent with forming such a mixture when the O9 outgroups are used, only three are when we introduce Switzerland\_HG and Natufians to the Right set of outgroups. These three populations are

Anatolia\_ChL, Armenia\_EBA, and Iran\_recent. As we will see below, we can model Anatolia\_ChL itself as a mix of Iran\_ChL and Anatolia\_N. The other two (Iran\_recent and Armenia\_EBA) cluster together (Fig. 1b) and Iran\_recent may be part from an un-sampled populations of Iran or may date to a later period than the Neolithic. We do not have an earlier sample than the Chalcolithic in Armenia, which, however, is not from the sampling location as our Early Bronze Age samples; thus, it is in principle possible that the Early Bronze Age population there (which is later in time than the Chalcolithic of Iran) was formed earlier than the Bronze Age, and may indeed be a source for the Iran\_ChL. Resolving these ambiguities will require dense spatio-temporal sampling of the Near East to determine how populations changed in each location. With our available data we can only show that populations can be modeled as mixtures of each other, without making strong claims about the archaeological consequences of these models.

Because of these uncertainties, we sought to gain further insight into the derivation of Iran\_ChL in terms of unambiguously earlier populations from the different regions of West Eurasia. Thus, we attempt to model Iran\_ChL as a 3-way mixture, fixing Iran\_N as one of the sources, and allowing the other two to be any pair of (EHG, WHG, CHG, Anatolia\_N, Levant\_N). Only two quadruples are consistent with rank=2 (Table S7.15). The quadruple (Iran\_ChL, Iran\_N, CHG, EHG) ( $P=0.245$ ), but Iran\_ChL cannot be modeled as a 3-way mixture of these sources as can be seen by the negative mixture proportions when attempting to fit such a model (Table S7.15).

The only possible way ( $P=0.221$ ) to model Iran\_ChL as a 3-way mixture involves  $10.1\pm 14.6\%$  Iran\_N,  $69.6\pm 14.7\%$  CHG, and  $20.3\pm 3.0\%$  Levant\_N ancestry, which is robust when adding both EHG and WHG as additional outgroups ( $P=0.267$ ;  $16.7\pm 10.3\%$  Iran\_N,  $63.1\pm 10.8\%$  CHG,  $20.2\pm 2.8\%$  Levant\_N). It might seem strange that the successful model infers that most of the ancestry of Iran\_ChL is from CHG and only a small fraction from Iran\_N, which is closer temporally, geographically, and genetically (Fig. S7.11) to Iran\_ChL than to CHG. However, recall that our estimate of the ancestry of CHG involved  $71.6\%$  Iran\_N ancestry, so our result is consistent with Iran\_ChL having the majority of its ancestry from a population like Iran\_N. Again, we emphasize that our analysis shows that Iran\_ChL can be modeled in terms of other populations in our dataset and should not be interpreted literally as a confluence of people from the Caucasus and the Levant into Chalcolithic Iran.

The high proportion of CHG ancestry in Iran\_ChL led us to also consider a simpler 2-way mixture model involving only CHG and Levant\_N (Table S7.16). This model is successful when all European hunter-gatherer groups and Natufians are introduced as outgroups to the Right set with a predicted  $79.9\pm 3.2\%$  CHG and  $20.1\pm 3.2\%$  Levant\_N ancestry. This should not be interpreted as evidence of a migration from the Caucasus to Iran, as the geographical extent of populations like CHG is unknown. This is demonstrated by the fact that when Iran\_N is added to the Right set the rank increases (Table

S7.16), and the model of Iran\_ChL=CHG+Levant\_N underpredicts shared genetic drift with Iran\_N as  $f_4(\text{Iran\_ChL}, \text{Fitted Iran\_ChL}; \text{Ust\_Ishim}, \text{Iran\_N}) = -0.00229$  ( $Z=-5.1$ ).

Finally, we did an additional sanity check of our “best estimate” from Table S7.15. Using the estimates of Basal Eurasian ancestry from Supplementary Information, section 4, we predict  $0.167*0.482+0.631*0.347+0.202*0.277=35.5\%$  Basal Eurasian ancestry for Iran\_ChL, which is consistent with the  $31.7\pm 5.1\%$  estimate of section 4.

**Figure S7.11: A close relationship between Neolithic and Chalcolithic Iran shown by the statistic  $f_4(\text{Iran\_ChL}, A; \text{Iran\_N}, \text{Chimp})$ .** Neolithic Iran shares more alleles with Chalcolithic Iran than with any populations outside Iran.

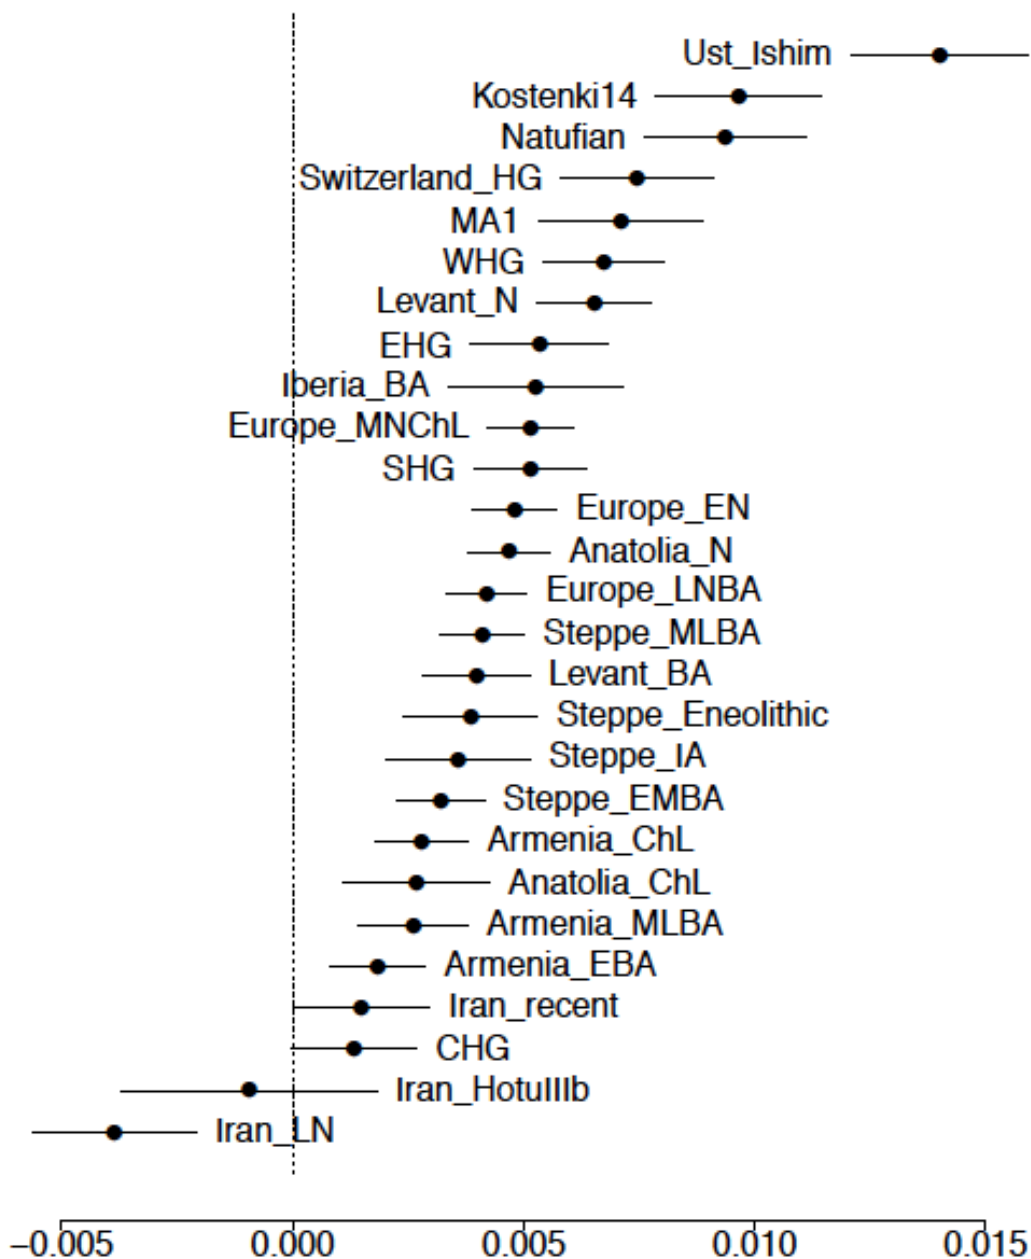

Figure S7.12: Testing for symmetry between Iran\_N and Iran\_ChL with the statistic  $f_4(\text{Iran}_N, \text{Iran}_{\text{ChL}}; A, \text{Chimp})$ . Chalcolithic Iran shares more alleles with all populations outside Iran.

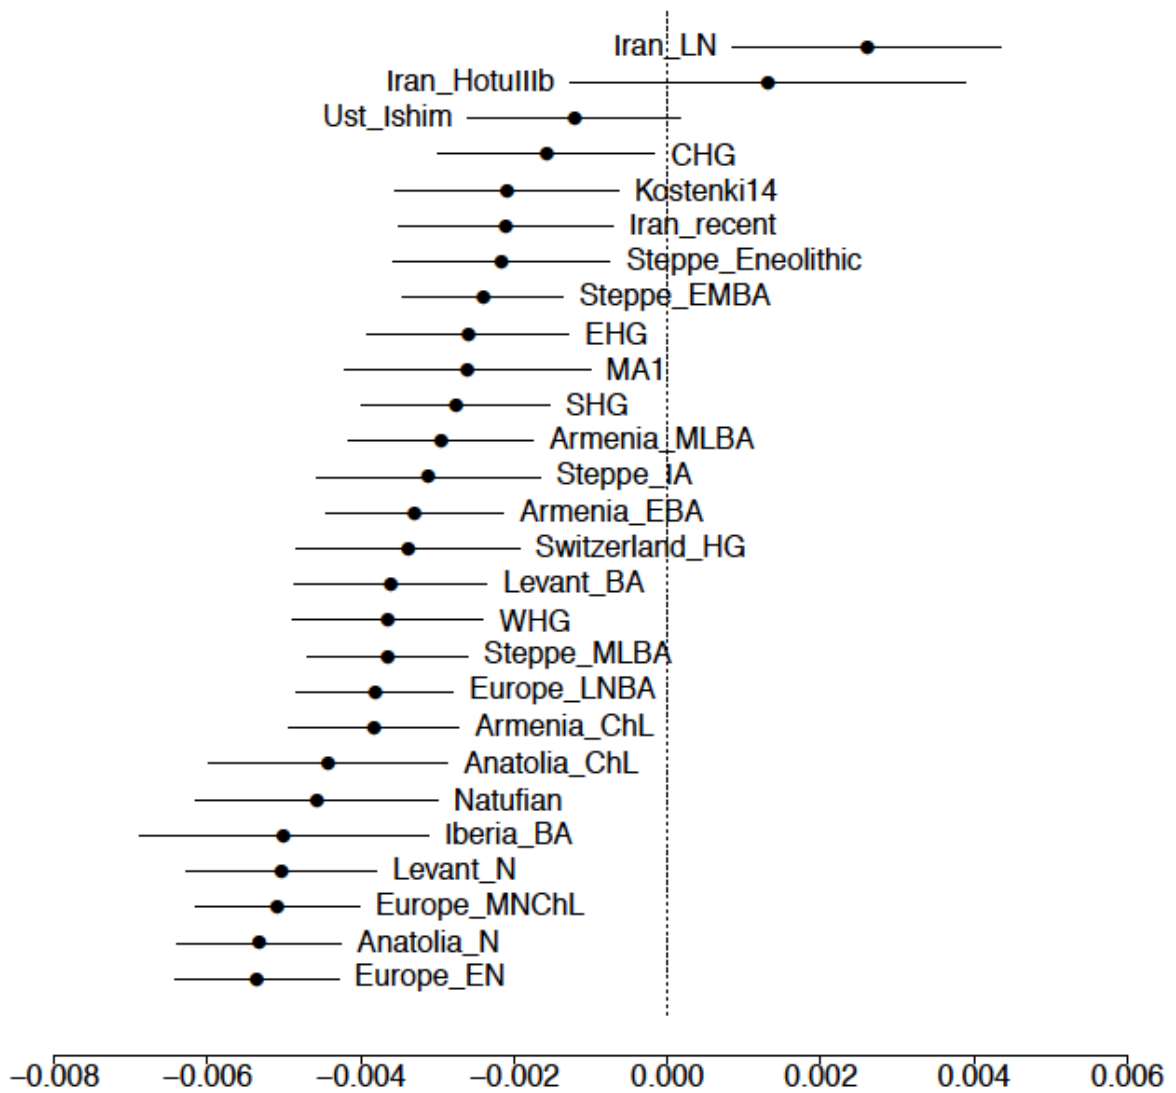

Figure S7.13: Testing for admixture in Iran\_ChL with the statistic  $f_3(\text{Iran\_ChL}; \text{Iran\_N}, A)$

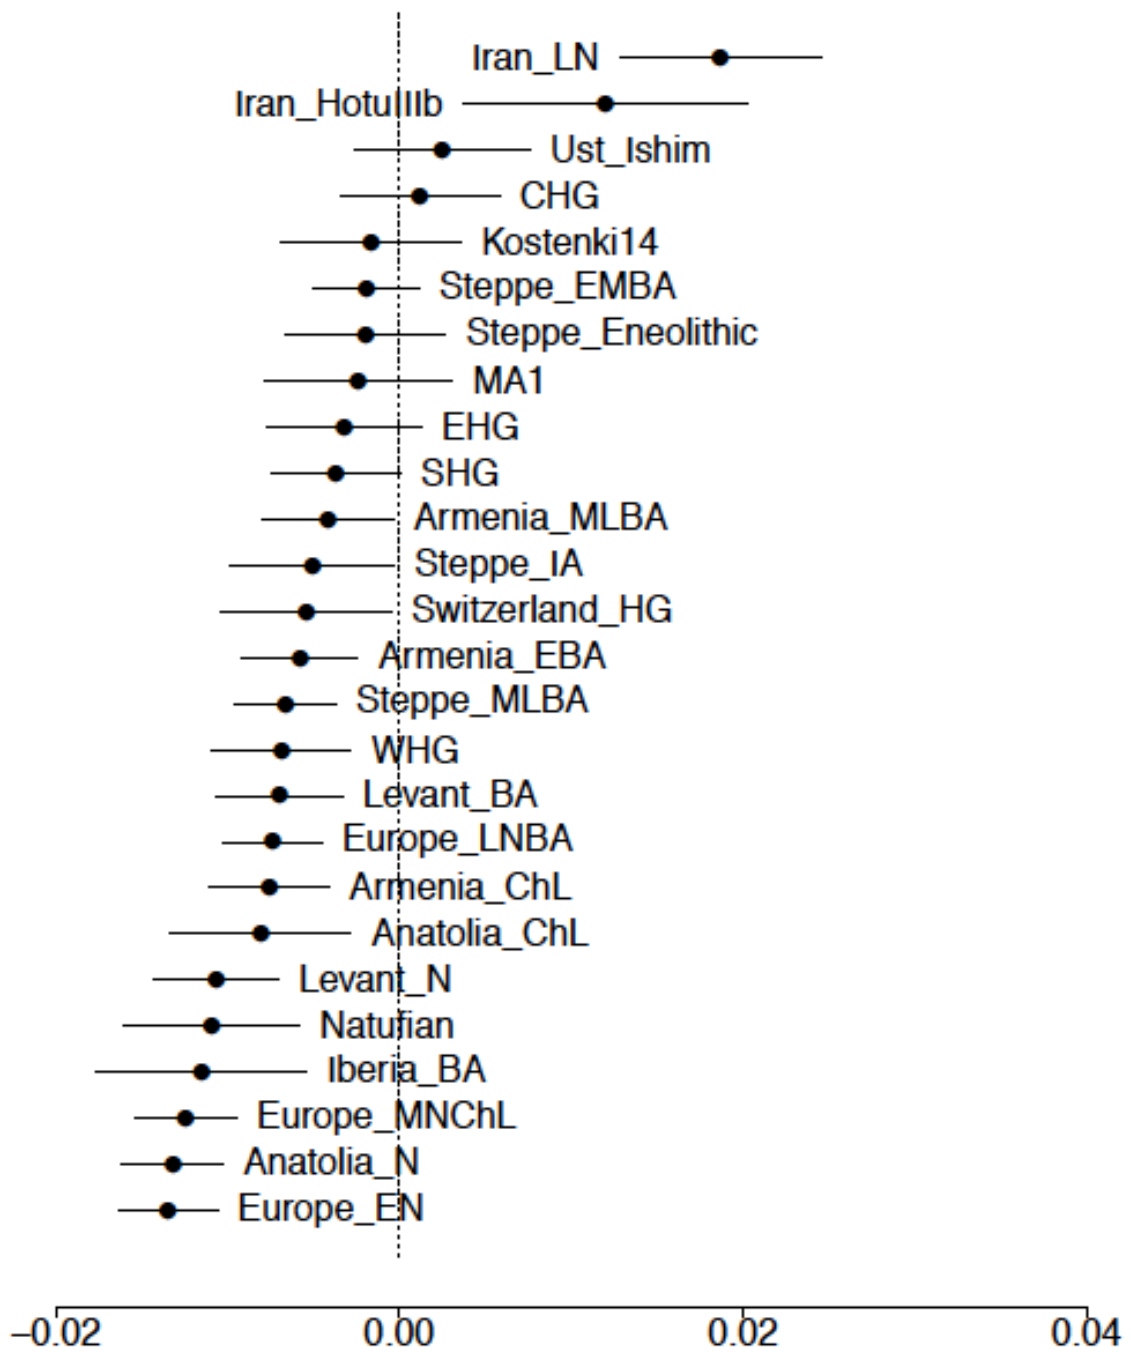



**Table S7.14: Modeling Iran\_ChL as a mixture of Iran\_N and another population A.**

| A                 | Right | P-value for rank=1 | Mixture Proportions |           |            |
|-------------------|-------|--------------------|---------------------|-----------|------------|
|                   |       |                    | Iran_N              | A         | Std. Error |
| Anatolia_ChL      | O9    | 3.22E-01           | 0.456               | 0.544     | 0.166      |
| Anatolia_ChL      | O9NS  | 4.53E-01           | 0.532               | 0.468     | 0.056      |
| Anatolia_N        | O9    | 3.66E-03           | 0.732               | 0.268     | 0.272      |
| Anatolia_N        | O9NS  | 4.66E-03           | 0.638               | 0.362     | 0.043      |
| Armenia_ChL       | O9    | 1.28E-01           | 0.618               | 0.382     | 0.094      |
| Armenia_ChL       | O9NS  | 7.81E-03           | 0.490               | 0.510     | 0.058      |
| Armenia_EBA       | O9    | 7.70E-01           | 0.293               | 0.707     | 0.129      |
| Armenia_EBA       | O9NS  | 4.37E-01           | 0.321               | 0.679     | 0.062      |
| Armenia_MLBA      | O9    | 1.41E-01           | 0.534               | 0.466     | 0.118      |
| Armenia_MLBA      | O9NS  | 1.15E-02           | 0.425               | 0.575     | 0.068      |
| CHG               | O9    | 3.31E-01           | 0.333               | 0.667     | 0.217      |
| CHG               | O9NS  | 5.42E-05           | -0.418              | 1.418     | 0.585      |
| EHG               | O9    | 6.76E-02           | 0.906               | 0.094     | 0.030      |
| EHG               | O9NS  | 3.50E-10           | 0.932               | 0.068     | 0.029      |
| Europe_EN         | O9    | 5.27E-03           | 0.642               | 0.358     | 0.256      |
| Europe_EN         | O9NS  | 6.88E-04           | 0.665               | 0.335     | 0.044      |
| Europe_LNBA       | O9    | 1.22E-01           | 0.722               | 0.278     | 0.069      |
| Europe_LNBA       | O9NS  | 1.94E-07           | 0.775               | 0.225     | 0.044      |
| Europe_MNChL      | O9    | 1.79E-02           | 0.665               | 0.335     | 0.131      |
| Europe_MNChL      | O9NS  | 4.15E-06           | 0.779               | 0.221     | 0.037      |
| Iberia_BA         | O9    | 3.24E-01           | 0.593               | 0.407     | 0.113      |
| Iberia_BA         | O9NS  | 1.06E-05           | 0.729               | 0.271     | 0.052      |
| Iran_LN           | O9    | 9.30E-01           | -105.971            | 106.971   | 34.482     |
| Iran_LN           | O9NS  | 6.10E-01           | -1.032              | 2.032     | 1.959      |
| Iran_HotulIb      | O9    | 1.60E-01           | -143.013            | 144.013   | 84.186     |
| Iran_HotulIb      | O9NS  | 3.06E-01           | -68.720             | 69.720    | 25.978     |
| Iran_recent       | O9    | 3.28E-01           | 0.279               | 0.721     | 0.281      |
| Iran_recent       | O9NS  | 2.15E-01           | 0.217               | 0.783     | 0.114      |
| Levant_BA         | O9    | 3.36E-02           | 3052.349            | -3051.349 | 26352.523  |
| Levant_BA         | O9NS  | 6.89E-05           | 0.622               | 0.378     | 0.058      |
| Levant_N          | O9    | 1.77E-02           | 1.327               | -0.327    | 0.366      |
| Levant_N          | O9NS  | 1.39E-05           | 0.775               | 0.225     | 0.037      |
| Natufian          | O9    | 3.00E-02           | 1.286               | -0.286    | 0.202      |
| SHG               | O9    | 1.05E-01           | 0.841               | 0.159     | 0.044      |
| SHG               | O9NS  | 1.04E-08           | 0.907               | 0.093     | 0.025      |
| Steppe_EMBA       | O9    | 7.44E-02           | 0.833               | 0.167     | 0.048      |
| Steppe_EMBA       | O9NS  | 5.61E-10           | 0.872               | 0.128     | 0.048      |
| Steppe_Eneolithic | O9    | 5.11E-02           | 0.886               | 0.114     | 0.037      |
| Steppe_Eneolithic | O9NS  | 2.97E-10           | 0.913               | 0.087     | 0.040      |
| Steppe_IA         | O9    | 1.59E-01           | 0.801               | 0.199     | 0.053      |
| Steppe_IA         | O9NS  | 5.16E-10           | 0.859               | 0.141     | 0.061      |
| Steppe_MLBA       | O9    | 1.44E-01           | 0.759               | 0.241     | 0.060      |
| Steppe_MLBA       | O9NS  | 1.04E-07           | 0.782               | 0.218     | 0.045      |
| Switzerland_HG    | O9    | 3.25E-02           | 0.841               | 0.159     | 0.061      |
| WHG               | O9    | 6.30E-02           | 0.820               | 0.180     | 0.056      |
| WHG               | O9NS  | 4.91E-09           | 0.941               | 0.059     | 0.017      |

**Table S7.15: Modeling Iran\_ChL as a mixture of Iran\_N and a pair of populations from the set (WHG, EHG, CHG, Anatolia\_N, Levant\_N).** We introduce Switzerland\_HG (which is related to WHG) and Natufians (which is related to Levant\_N) to better differentiate between the candidate source populations. Our “best estimate” is listed in bold.

| A          | B               | Outgroups     | P-value for rank=2 | Mixture Proportions |              |              | Standard Errors |              |              |
|------------|-----------------|---------------|--------------------|---------------------|--------------|--------------|-----------------|--------------|--------------|
|            |                 |               |                    | Iran_N              | A            | B            | Iran_N          | A            | B            |
| Anatolia_N | Levant_N        | O9NS          | 2.64E-03           | 0.632               | 0.398        | -0.030       | 0.047           | 0.104        | 0.076        |
| CHG        | Anatolia_N      | O9NS          | 6.97E-03           | 0.381               | 0.329        | 0.290        | 0.286           | 0.342        | 0.069        |
| CHG        | Levant_N        | O9NS          | 2.21E-01           | 0.101               | 0.696        | 0.203        | 0.146           | 0.147        | 0.030        |
| <b>CHG</b> | <b>Levant_N</b> | <b>O9ENSW</b> | <b>2.67E-01</b>    | <b>0.167</b>        | <b>0.631</b> | <b>0.202</b> | <b>0.103</b>    | <b>0.108</b> | <b>0.028</b> |
| EHG        | Anatolia_N      | O9NS          | 1.98E-02           | 0.602               | 0.052        | 0.347        | 0.043           | 0.022        | 0.042        |
| EHG        | CHG             | O9NS          | 2.45E-01           | -0.921              | -0.282       | 2.203        | 0.845           | 0.187        | 1.018        |
| EHG        | Levant_N        | O9NS          | 2.36E-02           | 0.635               | 0.110        | 0.255        | 0.041           | 0.022        | 0.032        |
| WHG        | Anatolia_N      | O9NS          | 2.94E-03           | 0.627               | -0.011       | 0.383        | 0.047           | 0.017        | 0.055        |
| WHG        | CHG             | O9NS          | 1.85E-02           | -0.713              | -0.105       | 1.818        | 1.664           | 0.182        | 1.839        |
| WHG        | EHG             | O9NS          | 2.20E-09           | 0.926               | 0.051        | 0.023        | 0.029           | 0.021        | 0.036        |
| WHG        | Levant_N        | O9NS          | 1.79E-04           | 0.750               | 0.044        | 0.206        | 0.036           | 0.015        | 0.036        |

**Table S7.16: Modeling Iran\_ChL as a mixture of CHG and Levant\_N.** The simpler 2-way mixture CHG+Levant\_N is consistent with the O9ENSW outgroups and parallels the position of Iran\_ChL in the PCA (Fig. 1b) between CHG and the Levant. However, while CHG may encompass some ancestry related to Neolithic Iran, it cannot be the source of ancestry for Iran\_ChL at the exclusion of Iran\_N, as when Iran\_N is added to the Outgroup set the CHG+Levant\_N model fails.

| Outgroups | P-value for rank=1 | Mixture Proportions |          |            |
|-----------|--------------------|---------------------|----------|------------|
|           |                    | CHG                 | Levant_N | Std. Error |
| O9        | 3.65E-01           | 0.825               | 0.175    | 0.092      |
| O9ENSW    | 1.74E-01           | 0.799               | 0.201    | 0.032      |
| O9EINSW   | 1.37E-05           | 0.870               | 0.130    | 0.033      |

## **Anatolia\_ChL**

A singleton individual from Chalcolithic Anatolia documents a population change that had apparently taken place since the Neolithic period samples also included in our study. Neolithic Anatolians cluster with Early European farmers and do not reside on the Near Eastern cline (Fig. 1b), but by the Chalcolithic period, it seems that they had shifted towards the northern end of the Near Eastern cline, occupied by present-day populations from western Asia (Extended Data Fig. 1). We carried out a similar analysis of Neolithic vs. Chalcolithic Anatolians as we did in Iran, studying statistics of the form  $f_4(\text{Anatolia\_ChL}, A; \text{Anatolia\_N}, \text{Chimp})$  (Fig. S7.14) and  $f_4(\text{Anatolia\_N}, \text{Anatolia\_ChL}; A, \text{Chimp})$  (Fig. S7.15), to understand population continuity or change in this far western part of Asia.

Neolithic Anatolia shares more alleles with Chalcolithic Anatolia than other populations (except European farmers descended from Anatolian ones), documenting a degree of continuity there. However, the two are not a clade, and Chalcolithic Anatolia differs from the Neolithic by sharing more alleles with “eastern” populations from the steppe, the Caucasus, and Iran. Thus, at the western end of western Asia, the population seems to become more “eastern” just as at the eastern end (Iran) it became more “western”, confirming the visual impression from PCA (Fig. 1b) for highly differentiated Neolithic populations (Anatolia\_N vs. Iran\_N) but relatively similar Chalcolithic ones (Anatolia\_ChL vs. Iran\_ChL).

We first model Anatolia\_ChL as a mix of Anatolia\_N and a population  $A$  (Table S7.17). Only populations from Iran and Armenia work as sources of the input into Anatolia, confirming the visual impression from PCA. This input is quantified as at least  $32.9 \pm 7.9\%$  when Iran\_ChL is used as a source population  $A$ .

**Figure S7.14:** The statistic  $f_4(\text{Anatolia\_ChL}, A; \text{Anatolia\_N}, \text{Chimp})$  shows that Neolithic Anatolia shares more alleles with Chalcolithic Anatolia than with other ancient populations. The two exceptions are early farmers from Europe who share genetic drift with Anatolian Neolithic as most of their ancestry is from that population.

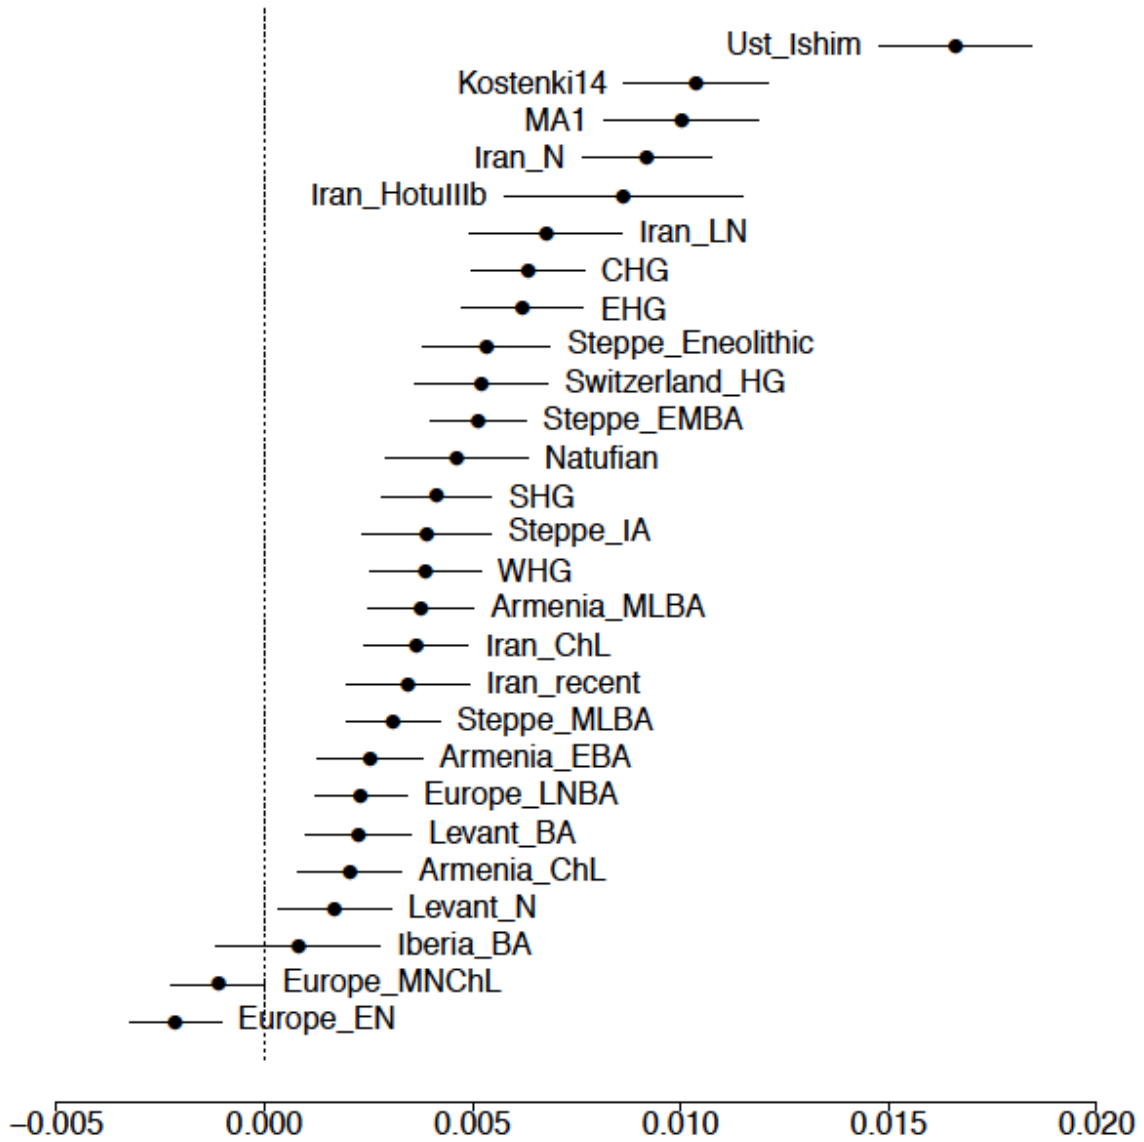

**Figure S7.15: The statistic  $f_4(\text{Anatolia\_N}, \text{Anatolia\_ChL}; A, \text{Chimp})$  becomes most negative for  $A$  being various populations east of Anatolia. Contrast with the analogous Fig. S7.12 for Iran that shows that Chalcolithic Iran is more “western” than Neolithic Iran.**

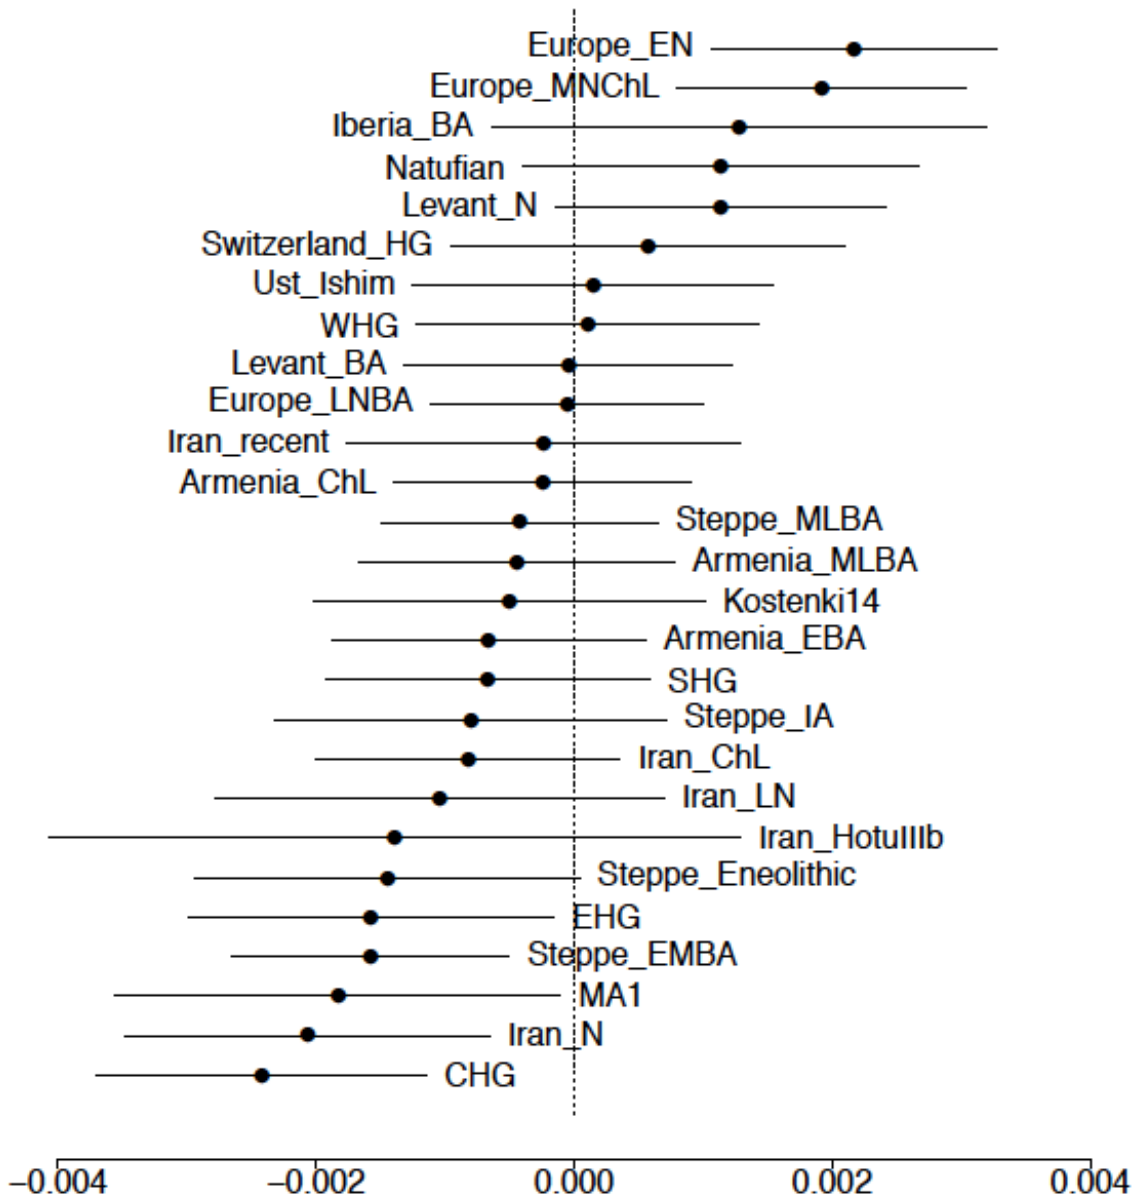

**Table S7.17: Modeling Chalcolithic Anatolia as a mix of Neolithic Anatolia and a population A.**

This modeling suggests that Anatolia received genetic input from the east prior to ~3,950BCE. We use Iran\_ChL as the “best” model as it has the lowest standard error.

| <b>A</b>          | <b>Outgroups</b> | <b>P-value for rank=1</b> | <b>Mixture Proportions</b> |              |                   |
|-------------------|------------------|---------------------------|----------------------------|--------------|-------------------|
|                   |                  |                           | <b>Anatolia_N</b>          | <b>A</b>     | <b>Std. Error</b> |
| Armenia_ChL       | O9NW             | 1.36E-01                  | 0.568                      | 0.432        | 0.101             |
| Armenia_EBA       | O9NW             | 2.95E-01                  | 0.543                      | 0.457        | 0.097             |
| Armenia_MLBA      | O9NW             | 9.30E-02                  | 0.624                      | 0.376        | 0.093             |
| CHG               | O9NW             | 4.40E-02                  | 0.751                      | 0.249        | 0.064             |
| EHG               | O9NW             | 1.78E-03                  | 0.926                      | 0.074        | 0.028             |
| Europe_EN         | O9NW             | 1.27E-03                  | 1.669                      | -0.669       | 0.345             |
| Europe_LNBA       | O9NW             | 2.33E-04                  | 0.912                      | 0.088        | 0.066             |
| Europe_MNChL      | O9NW             | 9.55E-04                  | 1.189                      | -0.189       | 0.084             |
| Iberia_BA         | O9NW             | 1.29E-04                  | 0.876                      | 0.124        | 0.201             |
| <b>Iran_ChL</b>   | <b>O9NW</b>      | <b>1.16E-01</b>           | <b>0.671</b>               | <b>0.329</b> | <b>0.075</b>      |
| Iran_LN           | O9NW             | 5.59E-03                  | 0.815                      | 0.185        | 0.065             |
| Iran_HotulIb      | O9NW             | 2.97E-02                  | 0.831                      | 0.169        | 0.054             |
| Iran_N            | O9NW             | 1.52E-02                  | 0.826                      | 0.174        | 0.050             |
| Iran_recent       | O9NW             | 1.10E-01                  | 0.632                      | 0.368        | 0.095             |
| Levant_BA         | O9NW             | 7.07E-03                  | 0.536                      | 0.464        | 0.169             |
| Levant_N          | O9NW             | 1.17E-04                  | 1.036                      | -0.036       | 0.110             |
| SHG               | O9NW             | 1.62E-04                  | 1.026                      | -0.026       | 0.028             |
| Steppe_EMBA       | O9NW             | 6.65E-03                  | 0.853                      | 0.147        | 0.045             |
| Steppe_Eneolithic | O9NW             | 2.50E-03                  | 0.902                      | 0.098        | 0.036             |
| Steppe_IA         | O9NW             | 2.57E-02                  | 0.826                      | 0.174        | 0.048             |
| Steppe_MLBA       | O9NW             | 8.34E-04                  | 0.866                      | 0.134        | 0.060             |
| Switzerland_HG    | O9NW             | 2.66E-03                  | 1.050                      | -0.050       | 0.018             |

### Armenia\_ChL

We do not have a pre-Chalcolithic sample from Armenia. We first model it as a 2-way mixture of any of WHG, EHG, CHG, Iran\_N, Levant\_N, Anatolia\_N (Table S7.18), but we find no pair of these populations that could be ancestral to Armenia\_ChL. We next model it as a 3-way mixture (Table S7.19), and determine that Armenia\_ChL can be modeled as 18.3±1.5 EHG, 29.2±2.4% Iran\_N, and 52.5±2.2% Anatolia\_N. In the absence of a pre-Chalcolithic sample, we cannot be certain whether the Neolithic population of Armenia (which borders Anatolia from the east) was similar to that of Northwestern Anatolia and experienced gene flow from the east and north, or the reverse.

**Table S7.18: Modeling Armenia\_ChL as a 2-way mix of WHG, EHG, CHG, Anatolia\_N, Iran\_N, Levant\_N.** Only the triple (Armenia\_ChL, CHG, Iran\_N) is consistent with being derived from 2 streams. However, Armenia\_ChL cannot be modeled as a mixture of CHG and Iran\_N as it has a mixture proportion from CHG that is >1.

| <b>A</b> | <b>B</b>   | <b>Outgroups</b> | <b>P-value for rank=1</b> | <b>Mixture Proportions</b> |          |                   |
|----------|------------|------------------|---------------------------|----------------------------|----------|-------------------|
|          |            |                  |                           | <b>A</b>                   | <b>B</b> | <b>Std. Error</b> |
| CHG      | Anatolia_N | O9NS             | 1.06E-07                  | 0.620                      | 0.380    | 0.053             |
| CHG      | Iran_N     | O9NS             | 9.04E-02                  | 2.170                      | -1.170   | 0.363             |
| CHG      | Levant_N   | O9NS             | 5.31E-09                  | 0.792                      | 0.208    | 0.036             |
| EHG      | Anatolia_N | O9NS             | 4.94E-14                  | 0.233                      | 0.767    | 0.017             |
| EHG      | CHG        | O9NS             | 4.90E-14                  | 0.059                      | 0.941    | 0.035             |
| EHG      | Iran_N     | O9NS             | 9.84E-28                  | 0.224                      | 0.776    | 0.034             |
| EHG      | Levant_N   | O9NS             | 4.98E-20                  | 0.389                      | 0.611    | 0.016             |
| Iran_N   | Anatolia_N | O9NS             | 1.72E-21                  | 0.471                      | 0.529    | 0.054             |
| Iran_N   | Levant_N   | O9NS             | 4.96E-31                  | 0.761                      | 0.239    | 0.046             |
| Levant_N | Anatolia_N | O9NS             | 5.30E-23                  | -0.789                     | 1.789    | 0.155             |
| WHG      | Anatolia_N | O9NS             | 8.60E-54                  | -0.006                     | 1.006    | 0.015             |
| WHG      | CHG        | O9NS             | 3.04E-13                  | 0.048                      | 0.952    | 0.018             |
| WHG      | EHG        | O9NS             | 3.44E-173                 | -0.254                     | 1.254    | 0.064             |
| WHG      | Iran_N     | O9NS             | 8.07E-26                  | 0.132                      | 0.868    | 0.017             |
| WHG      | Levant_N   | O9NS             | 4.60E-88                  | 0.176                      | 0.824    | 0.018             |

**Table S7.19: Modeling Armenia\_ChL as a 3-way mix of WHG, EHG, CHG, Anatolia\_N, Iran\_N, Levant\_N.** Several quadruples (Armenia\_ChL, *A*, *B*, *C*) are consistent with rank=2; for some, such as (CHG, Iran\_N, Anatolia\_N) negative mixture proportions are inferred, hence they are not feasible. Three choices are feasible (EHG, CHG, Anatolia\_N), (EHG, CHG, Levant\_N), and (EHG, Iran\_N, Anatolia\_N). To decide between them we first add WHG to the outgroups which rejects (EHG, CHG, Anatolia\_N). To decide between the other two that derive ancestry of Armenia\_ChL from Levant\_N or Anatolia\_N, we add the Levant\_N population to the outgroups for the model (EHG, Iran\_N, Anatolia\_N) or Anatolia\_N for the model (EHG, CHG, Levant\_N). Only the model (EHG, Iran\_N, Anatolia\_N) (marked in bold) is successful.

| <i>A</i>   | <i>B</i>      | <i>C</i>          | Outgroups     | P-value for rank=2 | Mixture Proportions |              |              | Standard Errors |              |              |
|------------|---------------|-------------------|---------------|--------------------|---------------------|--------------|--------------|-----------------|--------------|--------------|
|            |               |                   |               |                    | <i>A</i>            | <i>B</i>     | <i>C</i>     | <i>A</i>        | <i>B</i>     | <i>C</i>     |
| CHG        | Iran_N        | Anatolia_N        | O9NS          | 2.49E-01           | 1.363               | -0.668       | 0.306        | 0.299           | 0.242        | 0.097        |
| CHG        | Iran_N        | Levant_N          | O9NS          | 7.88E-01           | 1.532               | -0.766       | 0.234        | 0.218           | 0.208        | 0.059        |
| CHG        | Levant_N      | Anatolia_N        | O9NS          | 4.21E-08           | 0.600               | -0.031       | 0.432        | 0.085           | 0.116        | 0.191        |
| EHG        | CHG           | Anatolia_N        | O9NS          | 6.90E-02           | 0.140               | 0.391        | 0.469        | 0.021           | 0.050        | 0.042        |
| EHG        | CHG           | Anatolia_N        | O9NSW         | 4.18E-02           | 0.124               | 0.441        | 0.435        | 0.019           | 0.042        | 0.038        |
| EHG        | CHG           | Iran_N            | O9NS          | 4.49E-01           | -0.246              | 3.047        | -1.801       | 0.206           | 1.136        | 0.954        |
| EHG        | CHG           | Levant_N          | O9NS          | 3.36E-01           | 0.195               | 0.483        | 0.322        | 0.024           | 0.045        | 0.030        |
| EHG        | CHG           | Levant_N          | O9NSW         | 4.24E-01           | 0.198               | 0.478        | 0.324        | 0.021           | 0.040        | 0.028        |
| EHG        | CHG           | Levant_N          | O9ANSW        | 1.51E-19           | 0.164               | 0.366        | 0.470        | 0.031           | 0.062        | 0.036        |
| EHG        | Iran_N        | Anatolia_N        | O9NS          | 1.21E-01           | 0.199               | 0.272        | 0.529        | 0.017           | 0.034        | 0.034        |
| EHG        | Iran_N        | Anatolia_N        | O9NSW         | 8.27E-02           | 0.191               | 0.304        | 0.505        | 0.017           | 0.027        | 0.030        |
| <b>EHG</b> | <b>Iran_N</b> | <b>Anatolia_N</b> | <b>O9LNSW</b> | <b>8.91E-02</b>    | <b>0.183</b>        | <b>0.292</b> | <b>0.525</b> | <b>0.015</b>    | <b>0.024</b> | <b>0.022</b> |
| EHG        | Iran_N        | Levant_N          | O9NS          | 3.23E-03           | 0.287               | 0.344        | 0.369        | 0.019           | 0.035        | 0.028        |
| EHG        | Levant_N      | Anatolia_N        | O9NS          | 1.50E-14           | 0.226               | -0.031       | 0.805        | 0.033           | 0.120        | 0.150        |
| Iran_N     | Levant_N      | Anatolia_N        | O9NS          | 1.28E-14           | 0.349               | -0.420       | 1.071        | 0.058           | 0.111        | 0.145        |
| WHG        | CHG           | Anatolia_N        | O9NS          | 9.27E-08           | 0.020               | 0.623        | 0.357        | 0.015           | 0.053        | 0.057        |
| WHG        | CHG           | Iran_N            | O9NS          | 2.36E-01           | -0.107              | 2.750        | -1.643       | 0.097           | 0.892        | 0.810        |
| WHG        | CHG           | Levant_N          | O9NS          | 9.82E-07           | 0.060               | 0.719        | 0.221        | 0.015           | 0.037        | 0.033        |
| WHG        | EHG           | Anatolia_N        | O9NS          | 4.78E-05           | -0.100              | 0.289        | 0.811        | 0.015           | 0.019        | 0.018        |
| WHG        | EHG           | CHG               | O9NS          | 1.06E-13           | 0.042               | 0.021        | 0.937        | 0.021           | 0.042        | 0.035        |
| WHG        | EHG           | Iran_N            | O9NS          | 9.07E-24           | 0.090               | 0.136        | 0.774        | 0.020           | 0.041        | 0.033        |
| WHG        | EHG           | Levant_N          | O9NS          | 4.85E-20           | -0.029              | 0.413        | 0.616        | 0.019           | 0.023        | 0.017        |
| WHG        | Iran_N        | Anatolia_N        | O9NS          | 1.33E-18           | 0.062               | 0.516        | 0.423        | 0.017           | 0.056        | 0.065        |
| WHG        | Iran_N        | Levant_N          | O9NS          | 2.38E-19           | 0.121               | 0.645        | 0.234        | 0.015           | 0.040        | 0.038        |
| WHG        | Levant_N      | Anatolia_N        | O9NS          | 8.34E-08           | -0.235              | -1.283       | 2.518        | 0.045           | 0.210        | 0.248        |



### **Bronze Age Armenia: Armenia\_EBA and Armenia\_MLBA**

The Bronze Age samples from Armenia cluster with the Chalcolithic ones, but do not overlap with them; during the Early Bronze Age there is an “eastward” shift away from Europe; and during the Middle/Late Bronze Age a partial “westward” counter-shift in the opposite direction. This is confirmed with  $f_4$ -statistics in Fig. S7.16, 17.

We can model Armenia\_EBA as a 2-way mixture of  $60.3 \pm 3.0\%$  CHG and  $39.7 \pm 3.0\%$  Anatolia\_N (Table S7.20). Recalling that our best model for Armenia\_ChL involved  $52.5 \pm 2.2\%$  Anatolia\_N ancestry, and this seems to correspond to the observed eastward shift in PCA. Recall that CHG itself can be modeled as a mixture of EHG and Iran\_N, and thus our observation that Armenia\_EBA can be modeled as an Anatolia\_N+CHG mixture, while Armenia\_ChL could be modeled as an Anatolia\_N+EHG+Iran\_N mix, does not indicate either the “disappearance” or the “appearance” of a wholly new population element in Armenia at the Bronze Age transition. It only indicates that while the CHG can account for the non-Anatolian element in the Early Bronze Age mix, it cannot do so in the Chalcolithic mix (Table S7.18).

We cannot model the Middle/Late Bronze Age population of Armenia as a 2-way mixture (Table S7.21). The 3-way mixture model with  $10.5 \pm 2.0\%$  EHG,  $55.3 \pm 3.5\%$  CHG, and  $35.4 \pm 2.9\%$  Anatolia\_N fails marginally ( $P=0.0328$ ) when several ancient outgroups are introduced to the Right set (Table S7.22). This suggests added complexity in this population, although it suggests an increase in European hunter-gatherer-related ancestry during the Middle/Late Bronze Age, consistent with the observed “westward” shift.

**Figure S7.16: The statistic  $f_4(\text{Armenia\_ChL}, \text{Armenia\_EBA}; A, \text{Chimp})$  becomes most positive for populations from Europe and most negative for populations from Iran and the Caucasus. This corresponds to the “eastward” shift in PCA (Fig. 1) of Early Bronze Age Armenia.**

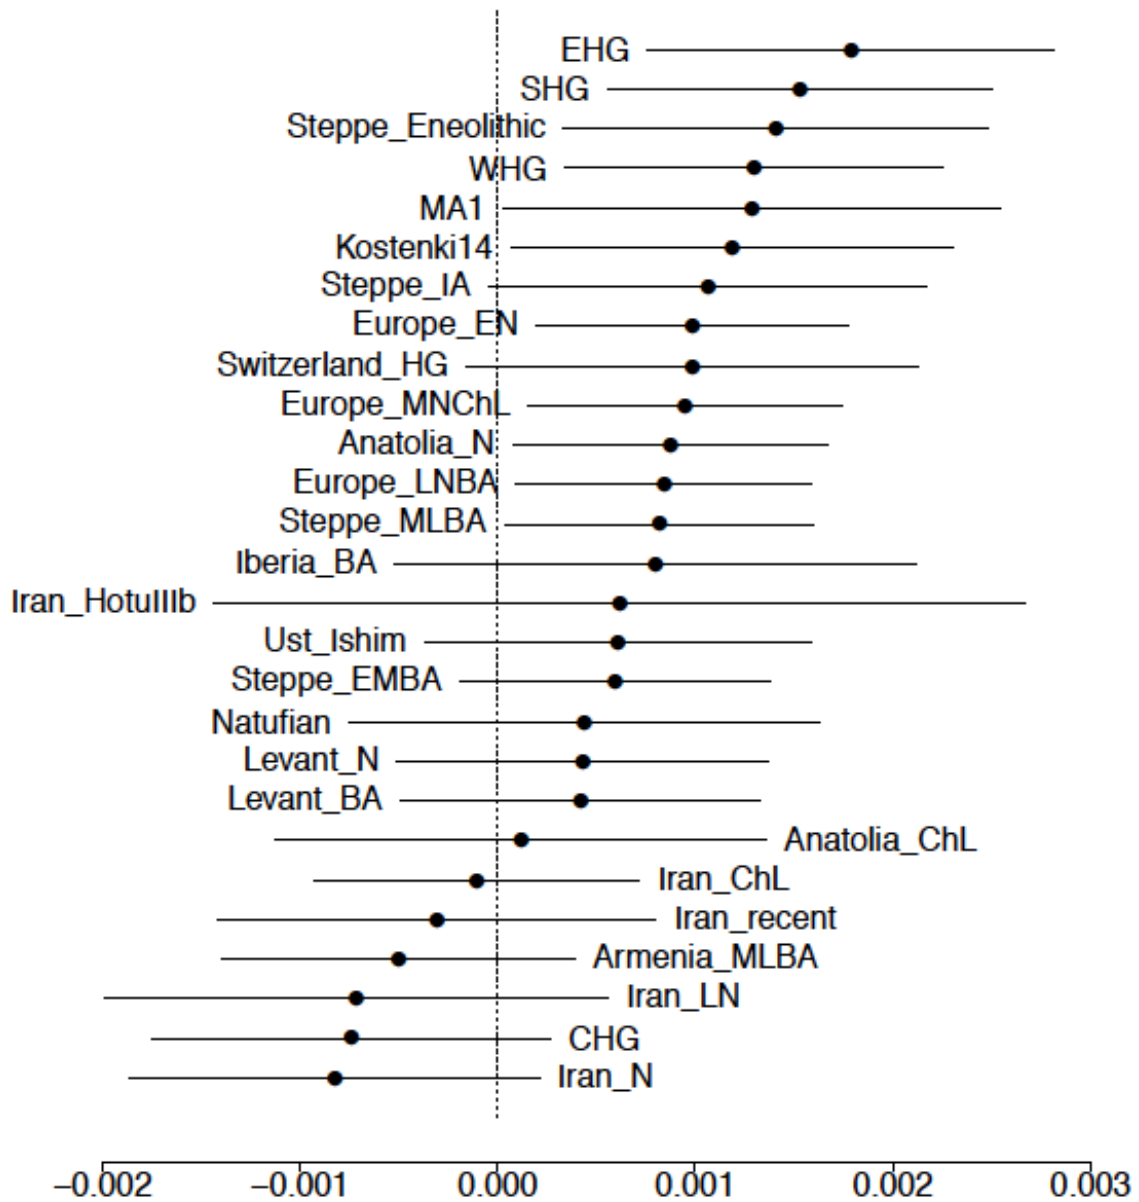

**Figure S7.17:** The statistic  $f_4(\text{Armenia\_EBA}, \text{Armenia\_MLBA}; A, \text{Chimp})$  becomes most negative for populations from Europe and most positive for populations from the Near East. This corresponds to the counter-shift “westward” in PCA that reverses the Early Bronze Age eastward shift.

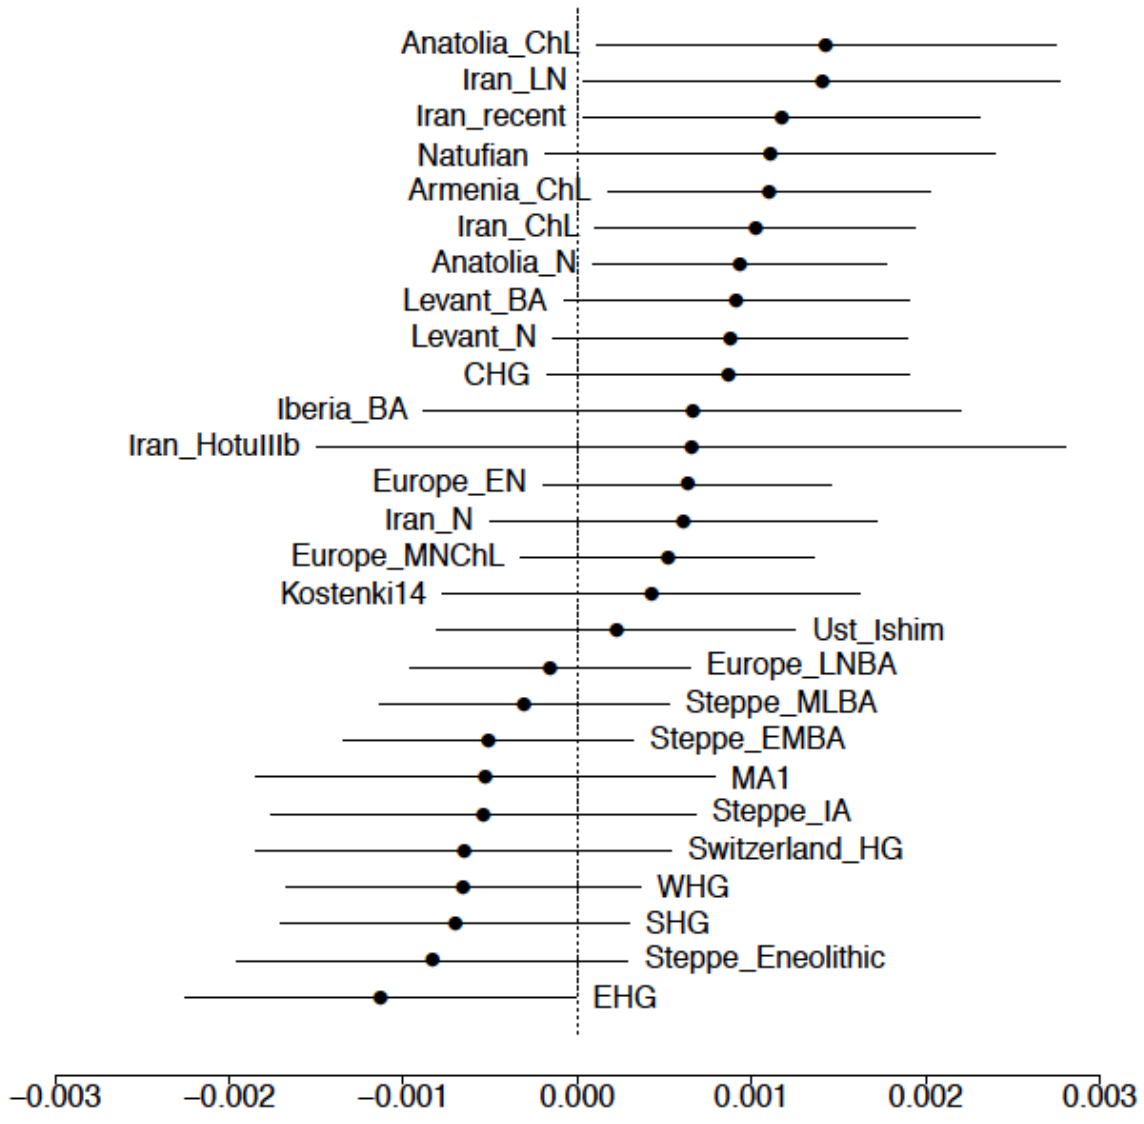

**Table S7.20: Modeling Armenia\_EBA as a 2-way mix of WHG, EHG, CHG, Anatolia\_N, Iran\_N, Levant\_N.** Only the pairs (CHG, Anatolia\_N) and (CHG, Levant\_N) can function as ancestral sources with the original set of outgroups (O9NS). Adding several other outgroups to the Right list, including Levant\_N for the (CHG, Anatolia\_N) model and Anatolia\_N for the (CHG, Levant\_N) model strongly rejects the latter. Thus, we can model Armenia\_EBA only as a 2-way mix of CHG and Anatolia\_N. The “best” model is marked in bold.

| <b>A</b>   | <b>B</b>          | <b>Outgroups</b> | <b>P-value for rank=1</b> | <b>Mixture Proportions</b> |              |                   |
|------------|-------------------|------------------|---------------------------|----------------------------|--------------|-------------------|
|            |                   |                  |                           | <b>A</b>                   | <b>B</b>     | <b>Std. Error</b> |
| CHG        | Anatolia_N        | O9NS             | 0.228375543               | 0.587                      | 0.413        | 0.048             |
| <b>CHG</b> | <b>Anatolia_N</b> | <b>O9EILNSW</b>  | <b>0.120301949</b>        | <b>0.603</b>               | <b>0.397</b> | <b>0.030</b>      |
| CHG        | Iran_N            | O9NS             | 0.002686523               | 1.973                      | -0.973       | 0.434             |
| CHG        | Levant_N          | O9NS             | 0.091447057               | 0.754                      | 0.246        | 0.033             |
| CHG        | Levant_N          | O9AEINSW         | 2.11E-09                  | 0.629                      | 0.371        | 0.021             |
| EHG        | Anatolia_N        | O9NS             | 2.01E-25                  | 0.155                      | 0.845        | 0.021             |
| EHG        | CHG               | O9NS             | 5.16E-08                  | -0.072                     | 1.072        | 0.034             |
| EHG        | Iran_N            | O9NS             | 3.11E-19                  | 0.102                      | 0.898        | 0.032             |
| EHG        | Levant_N          | O9NS             | 6.01E-25                  | 0.309                      | 0.691        | 0.019             |
| Iran_N     | Anatolia_N        | O9NS             | 1.54E-05                  | 0.456                      | 0.544        | 0.045             |
| Iran_N     | Levant_N          | O9NS             | 8.31E-15                  | 0.738                      | 0.262        | 0.044             |
| Levant_N   | Anatolia_N        | O9NS             | 6.94E-22                  | -0.651                     | 1.651        | 0.133             |
| WHG        | Anatolia_N        | O9NS             | 4.04E-37                  | -0.046                     | 1.046        | 0.014             |
| WHG        | CHG               | O9NS             | 6.07E-09                  | 0.018                      | 0.982        | 0.019             |
| WHG        | EHG               | O9NS             | 1.03E-173                 | -0.288                     | 1.288        | 0.062             |
| WHG        | Iran_N            | O9NS             | 1.06E-14                  | 0.107                      | 0.893        | 0.018             |
| WHG        | Levant_N          | O9NS             | 5.40E-69                  | 0.121                      | 0.879        | 0.017             |

**Table S7.21: Modeling Armenia\_MLBA as a 2-way mix of WHG, EHG, CHG, Anatolia\_N, Iran\_N, Levant\_N.** (Armenia\_MLBA,  $A$ ,  $B$ ) is not consistent with only two ancestral populations for most choices of  $A$  and  $B$ . (Armenia\_MLBA, CHG, Iran\_N) is, but Armenia\_MLBA cannot be modeled as a mixture of the other two populations.

| <b>A</b> | <b>B</b>   | <b>Outgroups</b> | <b>P-value for rank=1</b> | <b>Mixture Proportions</b> |          |                   |
|----------|------------|------------------|---------------------------|----------------------------|----------|-------------------|
|          |            |                  |                           | <b>A</b>                   | <b>B</b> | <b>Std. Error</b> |
| CHG      | Anatolia_N | O9NS             | 1.16E-05                  | 0.735                      | 0.265    | 0.062             |
| CHG      | Iran_N     | O9NS             | 1.07E-01                  | 1.895                      | -0.895   | 0.292             |
| CHG      | Levant_N   | O9NS             | 3.29E-06                  | 0.850                      | 0.150    | 0.041             |
| EHG      | Anatolia_N | O9NS             | 8.07E-18                  | 0.235                      | 0.765    | 0.021             |
| EHG      | CHG        | O9NS             | 7.74E-08                  | 0.062                      | 0.938    | 0.033             |
| EHG      | Iran_N     | O9NS             | 2.50E-17                  | 0.235                      | 0.765    | 0.029             |
| EHG      | Levant_N   | O9NS             | 2.30E-20                  | 0.382                      | 0.618    | 0.019             |
| Iran_N   | Anatolia_N | O9NS             | 6.48E-19                  | 0.534                      | 0.466    | 0.067             |
| Iran_N   | Levant_N   | O9NS             | 8.32E-26                  | 0.807                      | 0.193    | 0.059             |
| Levant_N | Anatolia_N | O9NS             | 2.98E-18                  | -0.920                     | 1.920    | 0.161             |
| WHG      | Anatolia_N | O9NS             | 1.74E-47                  | 0.002                      | 0.998    | 0.016             |
| WHG      | CHG        | O9NS             | 6.56E-07                  | 0.055                      | 0.945    | 0.018             |
| WHG      | EHG        | O9NS             | 2.24E-153                 | -0.172                     | 1.172    | 0.050             |
| WHG      | Iran_N     | O9NS             | 1.55E-17                  | 0.137                      | 0.863    | 0.017             |
| WHG      | Levant_N   | O9NS             | 2.78E-75                  | 0.150                      | 0.850    | 0.019             |

**Table S7.22: Modeling Armenia\_MLBA as a 3-way mix of WHG, EHG, CHG, Anatolia\_N, Iran\_N, Levant\_N.** The only plausible models with O9NS outgroups involve (EHG, CHG, Levant\_N) (P=0.0503) and (EHG, CHG, Anatolia\_N) (P=0.01). However, when we introduce Anatolia\_N as an outgroup to the first of these models, it fails (P=9.42E-05), while the latter can withstand the addition of several outgroups (P=0.0328 for O9ILNSW). While this fails at the (P=0.05) level, it is the “best” one with 3 ancestral populations and is marked in bold.

| A          | B          | C                 | Outgroups      | P-value for rank=2 | Mixture Proportions |              |              | Standard Errors |              |              |
|------------|------------|-------------------|----------------|--------------------|---------------------|--------------|--------------|-----------------|--------------|--------------|
|            |            |                   |                |                    | A                   | B            | C            | A               | B            | C            |
| CHG        | Iran_N     | Anatolia_N        | O9NS           | 1.99E-01           | 1.38                | -0.608       | 0.228        | 0.277           | 0.226        | 0.096        |
| CHG        | Iran_N     | Levant_N          | O9NS           | 4.92E-01           | 1.491               | -0.676       | 0.185        | 0.212           | 0.202        | 0.06         |
| CHG        | Levant_N   | Anatolia_N        | O9NS           | 5.22E-06           | 0.709               | -0.047       | 0.338        | 0.108           | 0.162        | 0.258        |
| EHG        | CHG        | Anatolia_N        | O9NS           | 1.00E-02           | 0.118               | 0.526        | 0.356        | 0.025           | 0.066        | 0.055        |
| EHG        | CHG        | Anatolia_N        | O9LNS          | 1.72E-02           | 0.118               | 0.521        | 0.361        | 0.025           | 0.049        | 0.035        |
| EHG        | CHG        | Anatolia_N        | O9LNSW         | 2.34E-02           | 0.11                | 0.538        | 0.353        | 0.022           | 0.043        | 0.033        |
| <b>EHG</b> | <b>CHG</b> | <b>Anatolia_N</b> | <b>O9ILNSW</b> | <b>3.28E-02</b>    | <b>0.104</b>        | <b>0.553</b> | <b>0.344</b> | <b>0.02</b>     | <b>0.035</b> | <b>0.029</b> |
| EHG        | CHG        | Iran_N            | O9NS           | 4.13E-01           | -0.206              | 2.647        | -1.441       | 0.183           | 0.952        | 0.787        |
| EHG        | CHG        | Levant_N          | O9NS           | 5.03E-02           | 0.161               | 0.576        | 0.263        | 0.028           | 0.058        | 0.039        |
| EHG        | CHG        | Levant_N          | O9ANS          | 9.42E-05           | 0.163               | 0.472        | 0.366        | 0.03            | 0.054        | 0.03         |
| EHG        | Iran_N     | Anatolia_N        | O9NS           | 4.70E-03           | 0.197               | 0.351        | 0.452        | 0.02            | 0.043        | 0.044        |
| EHG        | Iran_N     | Levant_N          | O9NS           | 5.13E-04           | 0.268               | 0.4          | 0.331        | 0.022           | 0.044        | 0.036        |
| EHG        | Levant_N   | Anatolia_N        | O9NS           | 1.91E-17           | 0.172               | -0.272       | 1.1          | 0.091           | 0.382        | 0.471        |
| Iran_N     | Levant_N   | Anatolia_N        | O9NS           | 9.77E-11           | 0.388               | -0.556       | 1.168        | 0.067           | 0.118        | 0.154        |
| WHG        | CHG        | Anatolia_N        | O9NS           | 2.27E-05           | 0.033               | 0.742        | 0.226        | 0.018           | 0.061        | 0.066        |
| WHG        | CHG        | Iran_N            | O9NS           | 1.25E-01           | -0.055              | 2.2          | -1.145       | 0.069           | 0.617        | 0.56         |
| WHG        | CHG        | Levant_N          | O9NS           | 1.31E-04           | 0.057               | 0.788        | 0.156        | 0.017           | 0.042        | 0.039        |
| WHG        | EHG        | Anatolia_N        | O9NS           | 4.18E-11           | -0.097              | 0.294        | 0.803        | 0.017           | 0.024        | 0.021        |
| WHG        | EHG        | CHG               | O9NS           | 3.25E-07           | 0.048               | 0.026        | 0.926        | 0.02            | 0.037        | 0.032        |
| WHG        | EHG        | Iran_N            | O9NS           | 9.79E-14           | 0.086               | 0.16         | 0.754        | 0.019           | 0.033        | 0.028        |
| WHG        | EHG        | Levant_N          | O9NS           | 3.15E-20           | -0.035              | 0.41         | 0.624        | 0.02            | 0.026        | 0.02         |
| WHG        | Iran_N     | Anatolia_N        | O9NS           | 9.84E-15           | 0.084               | 0.609        | 0.307        | 0.02            | 0.068        | 0.079        |
| WHG        | Iran_N     | Levant_N          | O9NS           | 3.32E-15           | 0.124               | 0.703        | 0.173        | 0.016           | 0.047        | 0.048        |
| WHG        | Levant_N   | Anatolia_N        | O9NS           | 1.30E-06           | -0.249              | -1.539       | 2.788        | 0.055           | 0.274        | 0.321        |

### **Levant\_BA**

Bronze Age Levant clusters with Neolithic Levant and Natufians (Fig. 1) but is shifted “northwards” along the Near Eastern cline. We confirm with  $f_4$ -statistics that this is a real shift and CHG and Neolithic/Mesolithic Iran shares more alleles with the Bronze Age than with the Neolithic Levant. We model Levant\_BA as a mix of Levant\_N and a population  $A$  (Table S7.23) and can model Levant\_B as  $55.7 \pm 2.8\%$  Levant\_N and  $44.3 \pm 2.8\%$  Iran\_ChL. The appearance of ancestry related to Iran between the Neolithic and Bronze Age appears to parallel the evidence of Y-chromosomes where haplogroup J is absent in all Natufians and Neolithic male individuals but appears in the Bronze Age individuals and continues to be a major Y-chromosomal lineage of Near Eastern Levantine populations today. Again, we caution that the source of the Iran\_ChL-related admixture need not be geographical present-day Iran, as we do not know the extent of populations similar to it in the ancient Near East. We also do not know whether the appearance of this admixture coincided with the beginning of the Bronze Age as there are intervening periods from the Levantine sequence between the Pre-Pottery Neolithic and the Bronze Age for which there are currently no data.

Figure S7.18: The statistic  $f_4(\text{Levant\_N}, \text{Levant\_BA}; A, \text{Chimp})$  becomes most negative for populations from Iran and the Caucasus.

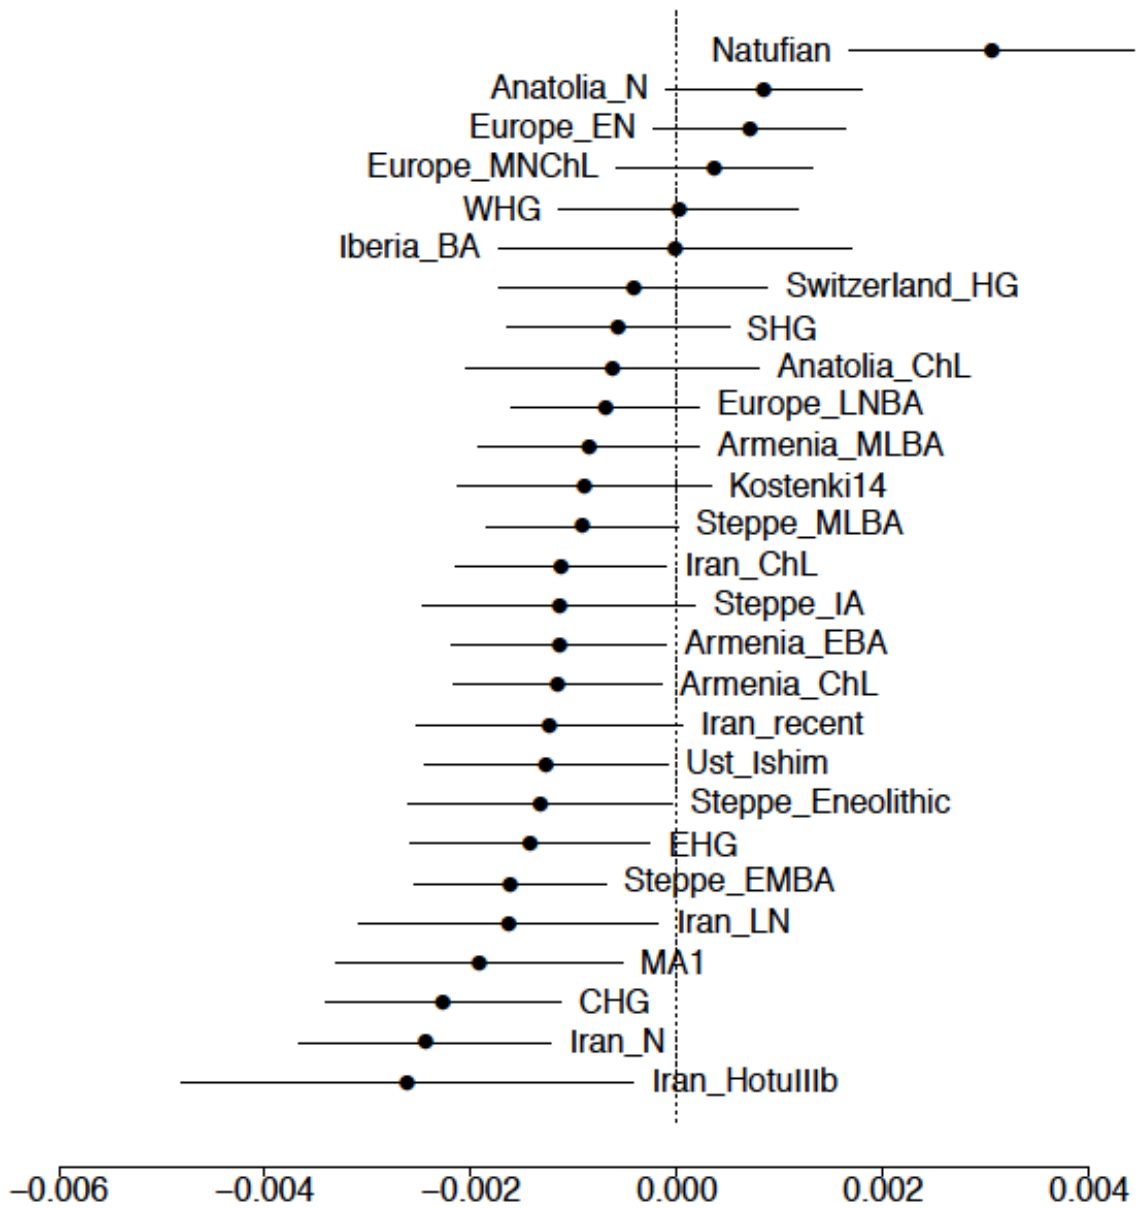



**Table S7.23: Modeling Levant\_BA as Levant\_N and a population A.** The Bronze Age Levant can be modeled as a mix of Neolithic Levant and all populations from Iran, as well as CHG and Armenia\_EBA when O9NW are used as outgroups. Armenia\_EBA is rejected as a source when Anatolia\_N, EHG, and Switzerland\_HG are added as outgroups. To distinguish between the remaining candidates, we add either Iran\_N to the set of outgroups (rejecting CHG, P=0.0142), or CHG (rejecting all remaining populations except Iran\_ChL and Iran\_recent). Our “best” estimate in bold involves ancestry from Levant\_N and Iran\_ChL which is robust to a large number of included outgroups (P=0.806 for O9ACENSW).

| <b>A</b>          | <b>Outgroups</b> | <b>P-value for rank=1</b> | <b>Mixture Proportions</b> |              |                   |
|-------------------|------------------|---------------------------|----------------------------|--------------|-------------------|
|                   |                  |                           | <b>Levant_N</b>            | <b>A</b>     | <b>Std. Error</b> |
| Anatolia_ChL      | O9NW             | 3.56E-04                  | 0.213                      | 0.787        | 0.117             |
| Anatolia_N        | O9NW             | 7.84E-16                  | 0.580                      | 0.420        | 0.109             |
| Armenia_ChL       | O9NW             | 1.54E-05                  | 0.578                      | 0.422        | 0.046             |
| Armenia_EBA       | O9NW             | <b>5.86E-02</b>           | 0.489                      | 0.511        | 0.045             |
| Armenia_EBA       | O9AENSW          | 3.54E-02                  | 0.513                      | 0.487        | 0.036             |
| Armenia_MLBA      | O9NW             | 3.55E-04                  | 0.585                      | 0.415        | 0.042             |
| CHG               | O9NW             | <b>6.16E-01</b>           | 0.613                      | 0.387        | 0.033             |
| CHG               | O9AENSW          | <b>5.88E-02</b>           | 0.699                      | 0.301        | 0.023             |
| CHG               | O9AEINSW         | 1.42E-02                  | 0.681                      | 0.319        | 0.022             |
| EHG               | O9NW             | 3.21E-13                  | 0.891                      | 0.109        | 0.019             |
| Europe_EN         | O9NW             | 2.71E-17                  | 0.775                      | 0.225        | 0.073             |
| Europe_LNBA       | O9NW             | 6.24E-14                  | 0.817                      | 0.183        | 0.033             |
| Europe_MNChL      | O9NW             | 8.52E-19                  | 0.923                      | 0.077        | 0.044             |
| Iberia_BA         | O9NW             | 1.28E-14                  | 0.766                      | 0.234        | 0.070             |
| Iran_ChL          | O9NW             | <b>7.96E-01</b>           | 0.524                      | 0.476        | 0.037             |
| <b>Iran_ChL</b>   | <b>O9ACENSW</b>  | <b>8.06E-01</b>           | <b>0.557</b>               | <b>0.443</b> | <b>0.028</b>      |
| Iran_LN           | O9NW             | <b>2.71E-01</b>           | 0.581                      | 0.419        | 0.041             |
| Iran_LN           | O9ACENSW         | 2.19E-02                  | 0.678                      | 0.322        | 0.025             |
| Iran_HotulIb      | O9NW             | <b>6.13E-02</b>           | 0.653                      | 0.347        | 0.042             |
| Iran_HotulIb      | O9ACENSW         | 5.39E-03                  | 0.729                      | 0.271        | 0.022             |
| Iran_N            | O9NW             | <b>1.60E-01</b>           | 0.657                      | 0.343        | 0.031             |
| Iran_N            | O9ACENSW         | 2.98E-02                  | 0.720                      | 0.280        | 0.020             |
| Iran_recent       | O9NW             | <b>3.32E-01</b>           | 0.531                      | 0.469        | 0.044             |
| Iran_recent       | O9ACENSW         | <b>2.40E-01</b>           | 0.552                      | 0.448        | 0.033             |
| SHG               | O9NW             | 1.85E-18                  | 0.957                      | 0.043        | 0.019             |
| Steppe_EMBA       | O9NW             | 2.13E-09                  | 0.799                      | 0.201        | 0.026             |
| Steppe_Eneolithic | O9NW             | 4.34E-12                  | 0.862                      | 0.138        | 0.023             |
| Steppe_IA         | O9NW             | 2.53E-05                  | 0.756                      | 0.244        | 0.028             |
| Steppe_MLBA       | O9NW             | 2.45E-12                  | 0.802                      | 0.198        | 0.031             |
| Switzerland_HG    | O9NW             | 1.69E-19                  | 1.000                      | 0.000        | 0.013             |

## WHG

The Western European hunter-gatherers cluster with an Upper Paleolithic hunter-gatherer from Switzerland in PCA (Fig. 1) that is almost twice their age. This gives us the opportunity to study population change or continuity in Europe. Using  $f_4$ -statistics (Fig. S7.19) we can show that the ancient West Eurasians share more alleles with WHG than with the Switzerland\_HG. For some of them, this can be explained by admixture with WHG-related populations. For example, early farmers of Europe admixed with WHG-related populations and are thus expected to share more genetic drift with them than with Switzerland\_HG. However, significant statistics also exist for populations from the Near East, including both the Levant and Anatolia, and also from eastern Europe.

We model WHG as a mix of Switzerland\_HG and a population  $A$  (Table S7.24). Remarkably while all triples (WHG, Switzerland\_HG,  $A$ ) are consistent with only two streams of ancestry, only for a subset of them is WHG modeled as a mix of Switzerland\_HG and  $A$  with a feasible ( $\leq 1$ ) proportion of ancestry from Switzerland\_HG. This subset includes only populations with EHG ancestry. We verify visually that WHG can be modeled as EHG+Switzerland\_HG by plotting statistics of the form  $f_4(\text{WHG}, \text{EHG}; O_2, O_3)$  vs.  $f_4(\text{WHG}, \text{Switzerland\_HG}; O_2, O_3)$  for all pairs ( $O_2, O_3$ ) of the outgroups. Such statistics (see ref. 1) are anti-correlated and form a line through the origin when WHG is a mix of EHG and Switzerland\_HG (Fig. S7.20). Direct evidence for admixture in WHG is provided by the negative  $f_3(\text{WHG}; \text{Switzerland\_HG}, \text{EHG}) = -0.01635$  ( $Z=-7.5$ ).

The modeling of ref. 1 made it unclear whether WHG was an admixed population or not (it was determined that at least one of WHG, EHG, MA1 must be). By making use of Switzerland\_HG we can now determine that at least WHG is admixed. Our study has shown that most ancient West Eurasian populations can be modeled as 2- or 3-way mixtures of earlier populations of Late Upper Paleolithic, Mesolithic, or Early Neolithic provenance, and it appears that this process of admixture was taking place even earlier in both Europe (in the case of WHG) and the Near East (where admixture with Basal Eurasians is evident; Supplementary Information, section 4). As more ancient samples from the Upper Paleolithic become available for study, we anticipate that the earlier history of admixture of West Eurasian populations will be further clarified.

**Table S7.24: Modeling WHG as a mix of Switzerland\_HG and a population *A* with the O9 outgroups.** We choose EHG as the “best” model as it has the lowest standard error.

| <b>A</b>          | <b>P-value for rank=1</b> | <b>Mixture Proportions</b> |              | <b>Std. Error</b> |
|-------------------|---------------------------|----------------------------|--------------|-------------------|
|                   |                           | <b>Switzerland_HG</b>      | <b>A</b>     |                   |
| Anatolia_ChL      | 2.31E-01                  | 1.048                      | -0.048       | 0.094             |
| Anatolia_N        | 2.72E-01                  | 1.078                      | -0.078       | 0.090             |
| Armenia_ChL       | 2.01E-01                  | 1.002                      | -0.002       | 0.104             |
| Armenia_EBA       | 2.09E-01                  | 1.023                      | -0.023       | 0.085             |
| Armenia_MLBA      | 2.03E-01                  | 0.977                      | 0.023        | 0.082             |
| CHG               | 2.11E-01                  | 1.025                      | -0.025       | 0.090             |
| <b>EHG</b>        | <b>4.35E-01</b>           | <b>0.933</b>               | <b>0.067</b> | <b>0.037</b>      |
| Europe_EN         | 2.51E-01                  | 1.069                      | -0.069       | 0.097             |
| Europe_LNBA       | 2.37E-01                  | 0.913                      | 0.087        | 0.102             |
| Europe_MNChL      | 2.59E-01                  | 1.088                      | -0.088       | 0.121             |
| Iberia_BA         | 2.16E-01                  | 1.039                      | -0.039       | 0.125             |
| Iran_ChL          | 2.10E-01                  | 1.022                      | -0.022       | 0.072             |
| Iran_LN           | 2.34E-01                  | 1.038                      | -0.038       | 0.063             |
| Iran_HotulIb      | 2.00E-01                  | 0.993                      | 0.007        | 0.062             |
| Iran_N            | 2.29E-01                  | 1.036                      | -0.036       | 0.062             |
| Iran_recent       | 2.01E-01                  | 0.996                      | 0.004        | 0.083             |
| Levant_BA         | 2.67E-01                  | 1.058                      | -0.058       | 0.067             |
| Levant_N          | 3.21E-01                  | 1.065                      | -0.065       | 0.057             |
| Natufian          | 4.66E-01                  | 1.082                      | -0.082       | 0.053             |
| SHG               | 3.71E-01                  | 0.868                      | 0.132        | 0.081             |
| Steppe_EMBA       | 3.69E-01                  | 0.895                      | 0.105        | 0.065             |
| Steppe_Eneolithic | 3.60E-01                  | 0.924                      | 0.076        | 0.049             |
| Steppe_IA         | 6.18E-01                  | 0.847                      | 0.153        | 0.067             |
| Steppe_MLBA       | 3.01E-01                  | 0.885                      | 0.115        | 0.087             |

Figure S7.19: Ancient West Eurasians share more alleles with WHG than with a ~14,000 year old Upper Paleolithic individual from Switzerland, as measured by the statistic  $f_4(\text{Switzerland\_HG}, \text{WHG}; A, \text{Chimp})$ .

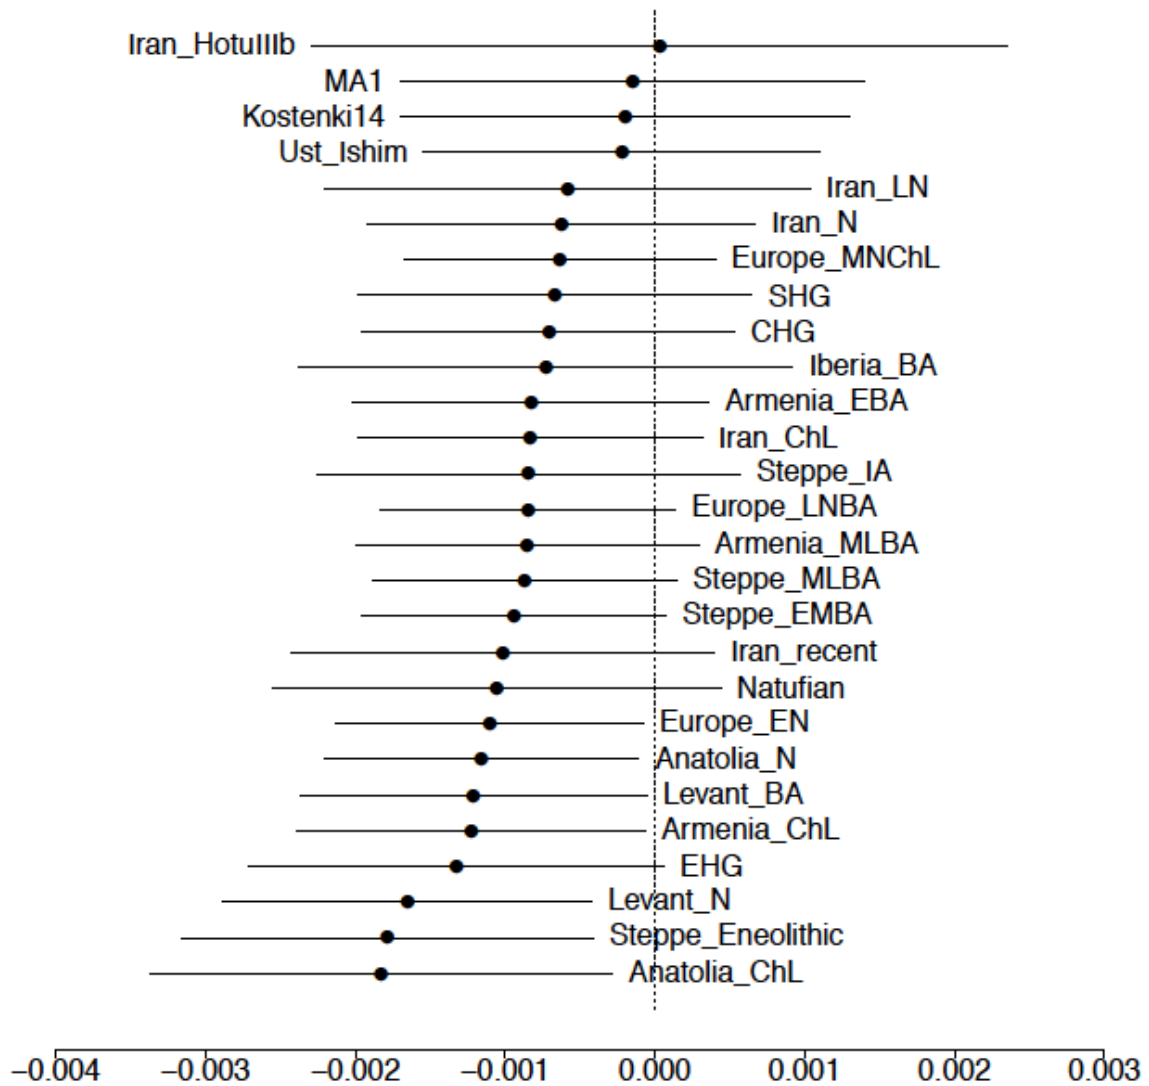

**Figure S7.20: Anti-correlation between  $f_4(\text{WHG, EHG; O}_2, \text{O}_3)$  vs.  $f_4(\text{WHG, Switzerland\_HG; O}_2, \text{O}_3)$  provides evidence for admixture in WHG from sources related to EHG and Switzerland\_HG.**

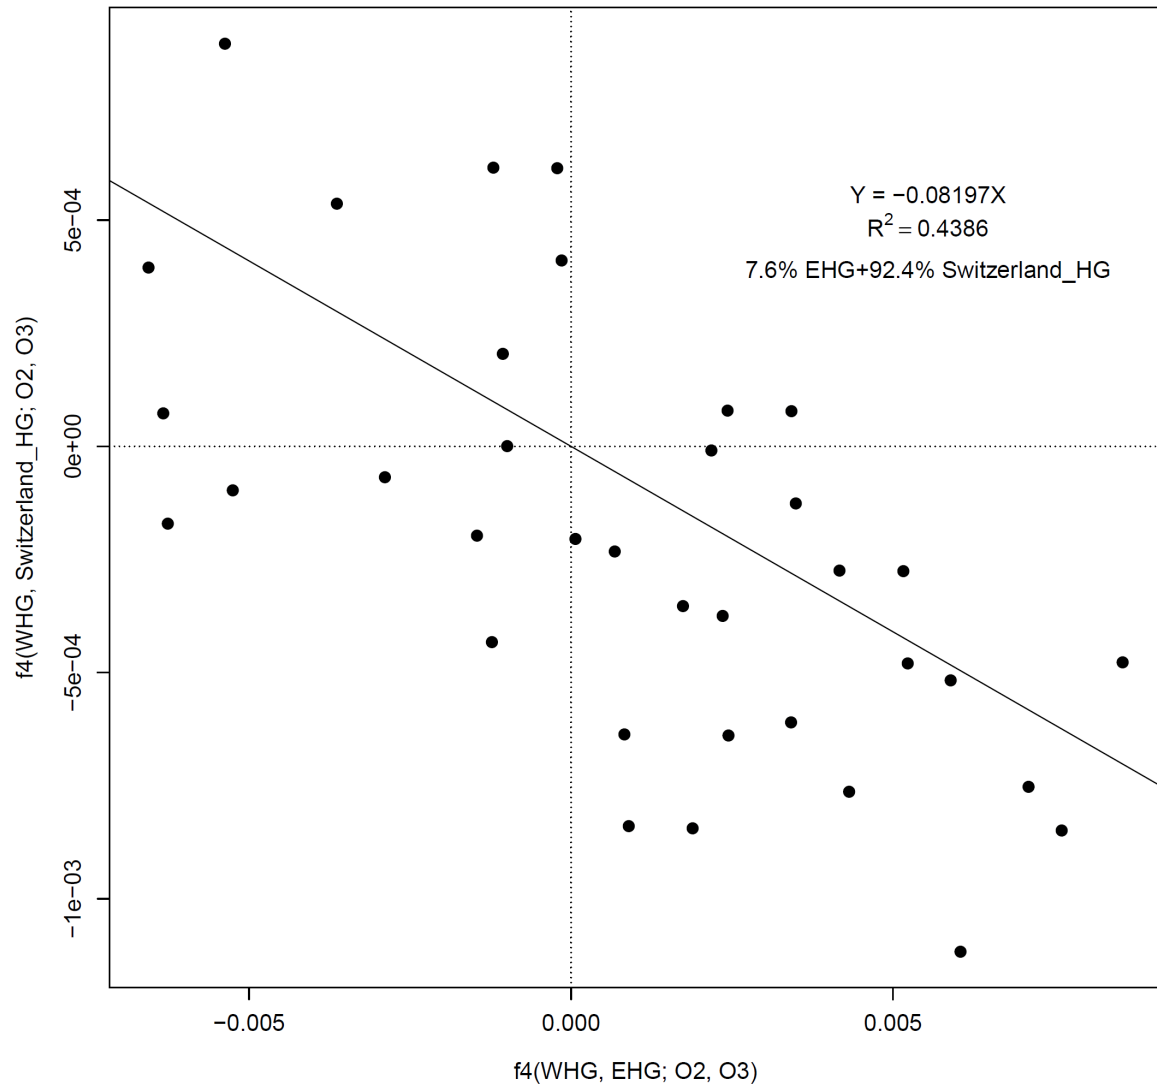

## Summary of findings

Table S7.25 summarizes our best estimates of admixture in ancient West Eurasian populations. These are displayed graphically in Fig. 4.

**Table S7.25: Mixture models for Ancient West Eurasian populations.** This is a compilation of the best identified mixture models in this section (supported at the  $P > 0.05$  level). Mixture models supported at only a  $0.05 > P > 0.01$  level are listed in italics.

|                     | Ancestral Source |                 |                   | Mixture Proportions |              |              | Standard Errors |              |              |
|---------------------|------------------|-----------------|-------------------|---------------------|--------------|--------------|-----------------|--------------|--------------|
|                     | A                | B               | C                 | A                   | B            | C            | A               | B            | C            |
| Levant_N            | Natufian         | Anatolia_N      |                   | 0.667               | 0.333        |              | 0.078           | 0.078        |              |
| Iran_HotuIIIb       | Iran_N           | EHG             |                   | 0.906               | 0.094        |              | 0.044           | 0.044        |              |
| CHG                 | Iran_N           | WHG             | EHG               | 0.716               | 0.07         | 0.214        | 0.06            | 0.038        | 0.077        |
| <i>Anatolia_N</i>   | <i>Iran_N</i>    | <i>Levant_N</i> | <i>WHG</i>        | <i>0.387</i>        | <i>0.339</i> | <i>0.274</i> | <i>0.134</i>    | <i>0.137</i> | <i>0.021</i> |
| SHG                 | EHG              | WHG             |                   | 0.429               | 0.571        |              | 0.03            | 0.03         |              |
| Europe_EN           | Anatolia_N       | WHG             |                   | 0.929               | 0.071        |              | 0.023           | 0.023        |              |
| Europe_MNChL        | Anatolia_N       | WHG             |                   | 0.779               | 0.221        |              | 0.028           | 0.028        |              |
| Europe_LNBA         | Europe_MNChL     | Steppe_EMBA     |                   | 0.469               | 0.531        |              | 0.016           | 0.016        |              |
| Steppe_EMBA         | EHG              | Iran_ChL        |                   | 0.568               | 0.432        |              | 0.012           | 0.012        |              |
| Steppe_EMLBA        | Steppe_EMBA      | Europe_MNChL    |                   | 0.684               | 0.315        |              | 0.021           | 0.021        |              |
| Iran_ChL            | Iran_N           | CHG             | Levant_N          | 0.167               | 0.631        | 0.202        | 0.103           | 0.108        | 0.028        |
| Anatolia_ChL        | Anatolia_N       | Iran_ChL        |                   | 0.671               | 0.329        |              | 0.075           | 0.075        |              |
| Armenia_ChL         | EHG              | Iran_N          | Anatolia_N        | 0.183               | 0.292        | 0.525        | 0.015           | 0.024        | 0.022        |
| Armenia_EBA         | CHG              | Anatolia_N      |                   | 0.603               | 0.397        |              | 0.03            | 0.03         |              |
| <i>Armenia_MLBA</i> | <i>EHG</i>       | <i>CHG</i>      | <i>Anatolia_N</i> | <i>0.104</i>        | <i>0.553</i> | <i>0.344</i> | <i>0.02</i>     | <i>0.035</i> | <i>0.029</i> |
| Levant_BA           | Levant_N         | Iran_ChL        |                   | 0.557               | 0.443        |              | 0.028           | 0.028        |              |
| WHG                 | Switzerland_HG   | EHG             |                   | 0.933               | 0.067        |              | 0.037           | 0.037        |              |

We tested the robustness of these models in two ways. First, we can use the mixture proportions to infer the amount of Basal Eurasian ancestry in different populations and compare it against our estimate from Supplementary Information, section 4. We find good agreement between the two (all are within  $|Z| < 3$  of the standard error of the Basal Eurasian estimate, and most are within  $|Z| < 1$ ) (Table S7.26). Second, we plot the PCA (Fig. 1) population means of each population and its ancestral sources together with the inferred mean when taking the weighted average of the sources according to the proportions of Table S7.25 (Extended Data Fig. 5). While the PCA (Fig. 1) is computed using present-day populations and it is not mathematically guaranteed that an ancient population will project near the weighted average of its ancestral populations, we nonetheless see that with some exceptions (such as Neolithic Anatolia, which is not well-modeled with existing populations, Table S7.25), actual and modeled means have good correspondence in PCA space.

**Table S7.26: Correspondence of Basal Eurasian estimates from Supplementary Information, section 4 with those obtained by substituting a population with its ancestral components from Table S7.25.**

| <b>Population</b> | <b>Basal Eurasian</b> | <b>Std. Error</b> | <b>Basal Eurasian from Mixture Model</b> | <b>Z</b> |
|-------------------|-----------------------|-------------------|------------------------------------------|----------|
| Levant_N          | 0.277                 | 0.050             | 0.383                                    | 2.1      |
| Iran_HotuIIIb     | 0.665                 | 0.125             | 0.436                                    | -1.8     |
| CHG               | 0.347                 | 0.058             | 0.345                                    | 0.0      |
| Anatolia_N        | 0.253                 | 0.039             | 0.280                                    | 0.7      |
| Europe_EN         | 0.239                 | 0.038             | 0.235                                    | -0.1     |
| Europe_MNChL      | 0.210                 | 0.035             | 0.197                                    | -0.4     |
| Europe_LNBA       | 0.201                 | 0.034             | 0.213                                    | 0.4      |
| Steppe_EMBA       | 0.216                 | 0.042             | 0.137                                    | -1.9     |
| Steppe_MLBA       | 0.182                 | 0.040             | 0.214                                    | 0.8      |
| Iran_ChL          | 0.317                 | 0.051             | 0.355                                    | 0.7      |
| Anatolia_ChL      | 0.084                 | 0.072             | 0.274                                    | 2.6      |
| Armenia_ChL       | 0.248                 | 0.045             | 0.273                                    | 0.6      |
| Armenia_EBA       | 0.276                 | 0.052             | 0.309                                    | 0.6      |
| Armenia_MLBA      | 0.305                 | 0.055             | 0.279                                    | -0.5     |
| Levant_BA         | 0.313                 | 0.049             | 0.295                                    | -0.4     |

## Conclusions

In this section we undertook the task of modeling the population history of ancient West Eurasians by means of the available samples. While it is important to remember that these samples are spatio-temporal snapshots of a genetic landscape that is only beginning to be explored, it is nonetheless encouraging that we could derive diverse ancient West Eurasian populations from each other in a master admixture graph (Table S7.25; Fig. 4) whose most interesting feature is the spread of ancestry from initially highly differentiated sources throughout the region of West Eurasia. Our results also hint that earlier admixture events contributed to the ancestry of the major Holocene ancestral sources (WHG, EHG, Iran\_N, Levant\_N). As the archaeogenetic record becomes more complete for earlier periods and regions outside West Eurasia, it may be possible to fully recreate the web of gene flows that began with the settlement of Eurasia by anatomically present humans.

## References

1. Haak, W. *et al.* Massive migration from the steppe was a source for Indo-European languages in Europe. *Nature* **522**, 207-211, (2015).
2. Reich, D. *et al.* Reconstructing Native American population history. *Nature* **488**, 370-374, (2012).
3. Fu, Q. *et al.* Genome sequence of a 45,000-year-old modern human from western Siberia. *Nature* **514**, 445-449, (2014).
4. Seguin-Orlando, A. *et al.* Genomic structure in Europeans dating back at least 36,200 years. *Science* **346**, 1113-1118, (2014).
5. Raghavan, M. *et al.* Upper Palaeolithic Siberian genome reveals dual ancestry of Native Americans. *Nature* **505**, 87-91, (2014).
6. Lazaridis, I. *et al.* Ancient human genomes suggest three ancestral populations for present-day Europeans. *Nature* **513**, 409-413, (2014).
7. Fu, Q. *et al.* An early modern human from Romania with a recent Neanderthal ancestor. *Nature* **524**, 216-219, (2015).
8. Skoglund, P. *et al.* Origins and genetic legacy of Neolithic farmers and hunter-gatherers in Europe. *Science* **336**, 466-469, (2012).
9. Lipson, M. *et al.* Efficient moment-based inference of admixture parameters and sources of gene flow. *Mol. Biol. Evol.* **30**, 1788-1802, (2013).
10. Patterson, N. *et al.* Ancient admixture in human history. *Genetics* **192**, 1065-1093, (2012).
11. Olalde, I. *et al.* Derived immune and ancestral pigmentation alleles in a 7,000-year-old Mesolithic European. *Nature* **507**, 225-228, (2014).
12. Sánchez-Quinto, F. *et al.* Genomic Affinities of Two 7,000-Year-Old Iberian Hunter-Gatherers. *Curr. Biol.* **22**, 1494-1499, (2012).
13. Skoglund, P. *et al.* Genomic Diversity and Admixture Differs for Stone-Age Scandinavian Foragers and Farmers. *Science* **344**, 747-750, (2014).
14. Allentoft, M. E. *et al.* Population genomics of Bronze Age Eurasia. *Nature* **522**, 167-172, (2015).
15. Hofmanová, Z. *et al.* Early farmers from across Europe directly descended from Neolithic Aegeans. *bioRxiv*, (2015).
16. Jones, E. R. *et al.* Upper Palaeolithic genomes reveal deep roots of modern Eurasians. *Nat. Commun.* **6**, 8912, (2015).
17. Mathieson, I. *et al.* Genome-wide patterns of selection in 230 ancient Eurasians. *Nature* **528**, 499-503, (2015).



## Supplementary Information 8

### Population admixture in East Africa from the Levantine Neolithic

East Africans are admixed with West Eurasians<sup>1,2</sup>, but the origin of the West Eurasian component in their ancestry has been obscure, as the strongest evidence of admixture among present-day East Africans is from Sardinians<sup>2</sup>. It has been proposed that an unsampled population from the Near East is the bearer of West Eurasian admixture into East Africa<sup>2</sup>. Here we systematically search for the source of this admixture. First, we verify that they do have such admixture by studying the statistic  $f_3(\text{East African}; \text{Mota}, A)$  where we iterate  $A$  to be any ancient or present-day population other than *East African*. This tests whether *East African* has admixture related to Mota<sup>3</sup>, a ~4,500-year old sample from Ethiopia predating inferred dates of admixture in East Africa and present-day populations. For each East African population in our dataset, we present the most negative statistic in Table S8.1. It is important to recognize that the population  $A$  that contributes to the most negative  $f_3$ -statistic is not necessarily the one that is mostly closely related to the admixing population in a phylogenetic sense. A negative  $f_3$ -statistic proves a history of admixture related (perhaps deeply) to population  $A$ , but it is not always the case that the statistic is most negative when we use as population  $A$  the correct mixing population<sup>4</sup>.

**Table S8.1: East African populations are admixed**

| <i>East African</i> | $A$          | $f_3(\text{East African}; \text{Mota}, A)$ | $Z$   |
|---------------------|--------------|--------------------------------------------|-------|
| Luhya               | Yoruba       | -0.00236                                   | -5.5  |
| Luo                 | Yoruba       | -0.00178                                   | -4.2  |
| Kikuyu              | Saudi        | -0.00526                                   | -5.3  |
| Jew_Ethiopian       | Sardinian    | -0.02488                                   | -34.7 |
| Somali              | Saudi        | -0.01776                                   | -25.9 |
| Oromo               | Greek        | -0.02348                                   | -27.9 |
| Masai               | Saudi        | -0.00951                                   | -12.4 |
| Dinka               | Iran_Hotullb | 0.02438                                    | 9.0   |
| Datog               | Sardinian    | -0.01580                                   | -15.1 |
| Sandawe             | Saudi        | -0.00488                                   | -6.6  |
| Hadza               | Iran_Hotullb | 0.05270                                    | 17.4  |

Most populations have significantly negative  $f_3$ -statistics, proving that they are admixed. For some (like the Luhya), the source of the admixture seems to be related to West Africa, some of them (like the Dinka and the Hadza) do not have a negative  $f_3$ -statistic, but for most of the others, the minimizing population  $A$  is a West Eurasian one.

A way to identify the source of admixture is to use the qpAdm framework<sup>5</sup>. We use the following set of “Right” outgroups, using the notation introduced in Supplementary Information, section 7:

**O8ENSW:** Ust\_Ishim, Kostenki14, MA1, Han, Papuan, Onge, Chukchi, Karitiana, EHG, Natufian, Switzerland\_HG, WHG

This set includes the same populations used in Supplementary Information, section 7, but we exclude Africans (as we want to have an African reference population), and add EHG, Natufians, Switzerland\_HG, and WHG as outgroups as they can help distinguish between different West Eurasian populations. The European hunter-gatherers are geographically improbable sources of admixture into East Africa, and the Natufians are temporally improbable as they predate by many thousands of years both the date of Mota and the inferred West Eurasian admixture into East Africa<sup>1,2</sup>, and our data in Supplementary Information, section 7 suggests that they had been replaced in the Levant as early as the Pre-Pottery Neolithic period.

We show the P-value for rank=1 for the triple (*East African*, Mota, *A*) varying *A* to be any ancient population not included in the Right set (Table S8.2). We notice that rank=1 is not rejected regardless of the West Eurasian population *A* for four populations: Luhya, Luo, Dinka, and Hadza. We inspect the inferred mixture proportions for these four populations (Table S8.3) and see that these populations have very low estimates (or even negative) estimates of West Eurasian ancestry that are not statistically significantly different from zero. Thus, for example, the triple (Dinka, Mota, Levant\_N) is consistent with 2 streams of ancestry not because Dinka is a mix of Mota and Levant\_N but because (Dinka, Mota) and Levant\_N represent two different ancestral populations. Because these four East African populations have negligible West Eurasian ancestry, it does not matter which West Eurasian population is chosen as a source of their ancestry (Table S8.2).

Considering the populations with non-negligible West Eurasian admixture, we observe that the Neolithic of the Levant is a good source for all but two of them, and the Bronze Age of the Levant for all but four of them (Table S8.2). This provides evidence that the source of the West Eurasian ancestry in East Africa is derived from the Levant and not from Europe or other parts of the Near East.

**Table S8.2: Modeling East Africans in the *HO* dataset as a mix of Mota and an ancient population *A*. The P-value for rank=1 is shown for the triple Left=(*East African*, Mota, *A*) and Right=O8ENSW. P-values greater than 0.05 are highlighted in red.**

|               | Anatolia_ChL | Anatolia_N | Armenia_ChL | Armenia_EBA | Armenia_MLBA | CHG      | Europe_EN | Europe_LNBA | Europe_MNChL | Iberia_BA | Iran_ChL |
|---------------|--------------|------------|-------------|-------------|--------------|----------|-----------|-------------|--------------|-----------|----------|
| Luhya         | 2.18E-01     | 1.95E-01   | 2.11E-01    | 2.12E-01    | 2.14E-01     | 2.00E-01 | 1.91E-01  | 1.92E-01    | 1.90E-01     | 1.89E-01  | 2.13E-01 |
| Luo           | 1.83E-01     | 1.68E-01   | 1.77E-01    | 1.79E-01    | 1.81E-01     | 1.70E-01 | 1.66E-01  | 1.67E-01    | 1.70E-01     | 1.68E-01  | 1.80E-01 |
| Kikuyu        | 1.18E-01     | 3.77E-02   | 2.71E-02    | 3.99E-02    | 3.03E-02     | 3.79E-03 | 1.81E-02  | 4.73E-03    | 2.62E-03     | 3.12E-03  | 3.99E-02 |
| Jew_Ethiopian | 8.09E-07     | 1.47E-10   | 2.71E-27    | 2.85E-23    | 2.56E-25     | 1.38E-39 | 4.42E-16  | 1.12E-33    | 8.79E-28     | 9.85E-23  | 8.07E-26 |
| Somali        | 8.71E-05     | 9.11E-07   | 1.74E-15    | 4.60E-14    | 9.94E-16     | 6.10E-25 | 1.77E-10  | 1.22E-20    | 3.58E-18     | 6.06E-17  | 5.28E-16 |
| Oromo         | 4.68E-05     | 1.56E-07   | 4.86E-14    | 2.26E-12    | 1.56E-14     | 3.11E-21 | 1.89E-10  | 9.15E-19    | 7.96E-17     | 4.14E-16  | 2.37E-14 |
| Masai         | 2.13E-02     | 2.20E-03   | 1.17E-04    | 5.20E-04    | 1.52E-04     | 1.42E-06 | 3.00E-04  | 2.82E-06    | 4.60E-06     | 5.14E-06  | 3.99E-04 |
| Dinka         | 1.42E-01     | 1.59E-01   | 1.45E-01    | 1.44E-01    | 1.43E-01     | 1.47E-01 | 1.65E-01  | 1.55E-01    | 1.84E-01     | 1.72E-01  | 1.44E-01 |
| Datog         | 9.78E-03     | 6.32E-03   | 8.36E-06    | 6.37E-05    | 1.23E-05     | 3.49E-09 | 8.27E-04  | 2.29E-07    | 3.03E-06     | 1.74E-06  | 3.54E-05 |
| Sandawe       | 1.08E-01     | 3.83E-02   | 4.41E-03    | 8.75E-03    | 3.72E-03     | 1.16E-04 | 9.35E-03  | 2.92E-04    | 4.32E-04     | 3.72E-04  | 7.40E-03 |
| Hadza         | 5.37E-01     | 4.59E-01   | 4.87E-01    | 5.03E-01    | 5.03E-01     | 4.41E-01 | 4.25E-01  | 4.06E-01    | 3.70E-01     | 3.80E-01  | 5.21E-01 |

  

|               | Iran_LN  | Iran_HotUllib | Iran_N   | Iran_recent | Levant_BA | Levant_N | SHG      | Steppe_EMBA | Steppe_Eneolithic | Steppe_IA | Steppe_MLBA |
|---------------|----------|---------------|----------|-------------|-----------|----------|----------|-------------|-------------------|-----------|-------------|
| Luhya         | 2.21E-01 | 2.55E-01      | 2.23E-01 | 2.09E-01    | 2.10E-01  | 2.08E-01 | 1.88E-01 | 2.09E-01    | 2.40E-01          | 2.19E-01  | 1.97E-01    |
| Luo           | 1.76E-01 | 1.97E-01      | 1.79E-01 | 1.73E-01    | 1.77E-01  | 1.81E-01 | 1.67E-01 | 1.75E-01    | 1.93E-01          | 1.85E-01  | 1.69E-01    |
| Kikuyu        | 1.92E-02 | 3.92E-03      | 3.76E-03 | 3.74E-02    | 1.34E-01  | 1.33E-01 | 8.04E-04 | 2.15E-03    | 2.08E-03          | 3.58E-03  | 4.93E-03    |
| Jew_Ethiopian | 2.27E-09 | 1.00E-15      | 2.32E-25 | 2.69E-18    | 4.20E-04  | 9.76E-04 | 5.95E-37 | 7.82E-46    | 7.41E-46          | 1.15E-42  | 9.97E-36    |
| Somali        | 2.62E-11 | 3.66E-15      | 8.91E-26 | 8.80E-14    | 2.04E-02  | 2.18E-01 | 8.41E-24 | 2.57E-27    | 1.33E-27          | 1.68E-26  | 1.43E-21    |
| Oromo         | 2.65E-09 | 4.47E-15      | 5.13E-21 | 1.51E-11    | 7.57E-04  | 1.86E-03 | 5.55E-22 | 1.23E-24    | 5.46E-25          | 4.17E-23  | 1.13E-19    |
| Masai         | 4.17E-05 | 1.43E-07      | 1.96E-07 | 1.69E-04    | 3.19E-02  | 5.65E-02 | 8.67E-08 | 1.33E-07    | 7.63E-08          | 4.81E-07  | 1.95E-06    |
| Dinka         | 1.44E-01 | 1.42E-01      | 1.42E-01 | 1.43E-01    | 1.46E-01  | 1.46E-01 | 1.71E-01 | 1.44E-01    | 1.44E-01          | 1.45E-01  | 1.50E-01    |
| Datog         | 2.05E-06 | 1.15E-09      | 6.20E-10 | 4.08E-05    | 6.58E-02  | 1.07E-01 | 4.67E-09 | 3.47E-10    | 6.01E-11          | 1.53E-09  | 6.98E-08    |
| Sandawe       | 1.24E-03 | 4.62E-05      | 4.81E-05 | 4.17E-03    | 2.40E-01  | 4.74E-01 | 2.82E-05 | 3.82E-05    | 2.65E-05          | 5.50E-05  | 2.30E-04    |
| Hadza         | 4.95E-01 | 5.37E-01      | 4.84E-01 | 5.01E-01    | 5.38E-01  | 5.46E-01 | 3.61E-01 | 4.34E-01    | 4.65E-01          | 4.59E-01  | 4.20E-01    |

**Table S8.3: Mixture Proportion of West Eurasian ancestry for East African populations in the *HO* dataset.** Mixture proportions less than 3 standard errors from zero are highlighted.

|                     |               | Luhya  | Luo    | Kikuyu | Jew_Ethiopian | Somali | Oromo | Masai  | Dinka  | Datog | Sandawe | Hadza |
|---------------------|---------------|--------|--------|--------|---------------|--------|-------|--------|--------|-------|---------|-------|
| Mixture Proportions | Anatolia_ChL  | 0.019  | 0.016  | 0.125  | 0.437         | 0.328  | 0.329 | 0.173  | -0.003 | 0.222 | 0.141   | 0.036 |
|                     | Anatolia_N    | 0.009  | 0.006  | 0.114  | 0.408         | 0.313  | 0.310 | 0.159  | -0.014 | 0.219 | 0.132   | 0.027 |
|                     | Armenia_ChL   | 0.017  | 0.013  | 0.118  | 0.370         | 0.282  | 0.288 | 0.153  | -0.006 | 0.202 | 0.126   | 0.032 |
|                     | Armenia_EBA   | 0.019  | 0.015  | 0.133  | 0.438         | 0.326  | 0.336 | 0.177  | -0.004 | 0.233 | 0.144   | 0.037 |
|                     | Armenia_MLBA  | 0.018  | 0.015  | 0.122  | 0.389         | 0.294  | 0.294 | 0.158  | -0.003 | 0.207 | 0.129   | 0.034 |
|                     | CHG           | 0.015  | 0.010  | 0.131  | 0.419         | 0.304  | 0.317 | 0.168  | -0.008 | 0.211 | 0.133   | 0.034 |
|                     | Europe_EN     | 0.005  | 0.002  | 0.102  | 0.364         | 0.276  | 0.274 | 0.140  | -0.015 | 0.197 | 0.116   | 0.022 |
|                     | Europe_LNBA   | 0.005  | 0.003  | 0.079  | 0.246         | 0.192  | 0.193 | 0.102  | -0.009 | 0.139 | 0.083   | 0.016 |
|                     | Europe_MNChL  | -0.003 | -0.005 | 0.075  | 0.269         | 0.204  | 0.202 | 0.103  | -0.017 | 0.149 | 0.084   | 0.011 |
|                     | Iberia_BA     | -0.001 | -0.003 | 0.078  | 0.311         | 0.219  | 0.221 | 0.106  | -0.015 | 0.150 | 0.086   | 0.013 |
|                     | Iran_ChL      | 0.022  | 0.018  | 0.162  | 0.530         | 0.389  | 0.398 | 0.212  | -0.004 | 0.278 | 0.173   | 0.046 |
|                     | Iran_LN       | 0.037  | 0.024  | 0.208  | 0.938         | 0.699  | 0.707 | 0.291  | -0.008 | 0.389 | 0.220   | 0.060 |
|                     | Iran_Hotulllb | 0.041  | 0.032  | 0.166  | 0.974         | 0.619  | 0.569 | 0.222  | 0.007  | 0.287 | 0.164   | 0.056 |
|                     | Iran_N        | 0.036  | 0.026  | 0.185  | 1.120         | 0.444  | 0.608 | 0.229  | -0.001 | 0.314 | 0.179   | 0.056 |
|                     | Iran_recent   | 0.021  | 0.015  | 0.146  | 0.534         | 0.365  | 0.385 | 0.189  | -0.005 | 0.252 | 0.152   | 0.040 |
|                     | Levant_BA     | 0.020  | 0.016  | 0.149  | 0.515         | 0.397  | 0.390 | 0.205  | -0.008 | 0.275 | 0.172   | 0.042 |
|                     | Levant_N      | 0.015  | 0.015  | 0.122  | 0.418         | 0.332  | 0.321 | 0.171  | -0.007 | 0.223 | 0.146   | 0.035 |
|                     | SHG           | 0.000  | -0.002 | 0.043  | 0.140         | 0.109  | 0.107 | 0.055  | -0.009 | 0.078 | 0.044   | 0.005 |
| Steppe_EMBA         | 0.011         | 0.008  | 0.074  | 0.182  | 0.156         | 0.156  | 0.089 | -0.002 | 0.113  | 0.072 | 0.019   |       |
| Steppe_Eneolithic   | 0.014         | 0.010  | 0.057  | 0.140  | 0.120         | 0.120  | 0.068 | 0.001  | 0.081  | 0.054 | 0.017   |       |
| Steppe_IA           | 0.017         | 0.014  | 0.092  | 0.257  | 0.197         | 0.202  | 0.113 | 0.004  | 0.144  | 0.089 | 0.026   |       |
| Steppe_MLBA         | 0.008         | 0.005  | 0.079  | 0.235  | 0.184         | 0.185  | 0.099 | -0.007 | 0.133  | 0.081 | 0.018   |       |
| Standard Errors     | Anatolia_ChL  | 0.023  | 0.023  | 0.022  | 0.024         | 0.021  | 0.024 | 0.021  | 0.023  | 0.023 | 0.020   | 0.023 |
|                     | Anatolia_N    | 0.022  | 0.022  | 0.021  | 0.018         | 0.018  | 0.020 | 0.020  | 0.023  | 0.022 | 0.019   | 0.023 |
|                     | Armenia_ChL   | 0.023  | 0.023  | 0.022  | 0.025         | 0.020  | 0.023 | 0.021  | 0.024  | 0.024 | 0.021   | 0.023 |
|                     | Armenia_EBA   | 0.026  | 0.026  | 0.024  | 0.028         | 0.023  | 0.027 | 0.023  | 0.026  | 0.026 | 0.023   | 0.026 |
|                     | Armenia_MLBA  | 0.024  | 0.024  | 0.023  | 0.024         | 0.021  | 0.024 | 0.021  | 0.024  | 0.024 | 0.021   | 0.024 |
|                     | CHG           | 0.030  | 0.030  | 0.029  | 0.045         | 0.031  | 0.036 | 0.028  | 0.030  | 0.032 | 0.027   | 0.030 |
|                     | Europe_EN     | 0.021  | 0.021  | 0.020  | 0.017         | 0.017  | 0.019 | 0.018  | 0.021  | 0.021 | 0.018   | 0.021 |
|                     | Europe_LNBA   | 0.018  | 0.018  | 0.017  | 0.017         | 0.016  | 0.018 | 0.016  | 0.018  | 0.018 | 0.016   | 0.018 |
|                     | Europe_MNChL  | 0.018  | 0.018  | 0.017  | 0.017         | 0.016  | 0.018 | 0.016  | 0.018  | 0.018 | 0.016   | 0.018 |
|                     | Iberia_BA     | 0.018  | 0.018  | 0.018  | 0.023         | 0.019  | 0.022 | 0.017  | 0.018  | 0.020 | 0.017   | 0.018 |
|                     | Iran_ChL      | 0.031  | 0.031  | 0.030  | 0.035         | 0.028  | 0.033 | 0.027  | 0.032  | 0.031 | 0.027   | 0.031 |
|                     | Iran_LN       | 0.044  | 0.044  | 0.044  | 0.082         | 0.088  | 0.082 | 0.052  | 0.044  | 0.066 | 0.043   | 0.044 |
|                     | Iran_Hotulllb | 0.038  | 0.040  | 0.044  | 0.169         | 0.117  | 0.105 | 0.062  | 0.039  | 0.084 | 0.047   | 0.038 |
|                     | Iran_N        | 0.041  | 0.041  | 0.042  | 0.153         | 0.233  | 0.146 | 0.044  | 0.042  | 0.061 | 0.040   | 0.042 |
|                     | Iran_recent   | 0.029  | 0.028  | 0.027  | 0.039         | 0.030  | 0.033 | 0.027  | 0.028  | 0.030 | 0.025   | 0.028 |
|                     | Levant_BA     | 0.027  | 0.027  | 0.025  | 0.021         | 0.020  | 0.023 | 0.023  | 0.027  | 0.025 | 0.022   | 0.027 |
|                     | Levant_N      | 0.022  | 0.022  | 0.021  | 0.017         | 0.017  | 0.020 | 0.019  | 0.022  | 0.021 | 0.019   | 0.022 |
|                     | SHG           | 0.011  | 0.011  | 0.011  | 0.012         | 0.011  | 0.012 | 0.011  | 0.011  | 0.012 | 0.011   | 0.011 |
| Steppe_EMBA         | 0.018         | 0.017  | 0.017  | 0.018  | 0.016         | 0.018  | 0.016 | 0.017  | 0.018  | 0.016 | 0.018   |       |
| Steppe_Eneolithic   | 0.014         | 0.013  | 0.014  | 0.016  | 0.014         | 0.015  | 0.013 | 0.014  | 0.015  | 0.013 | 0.014   |       |
| Steppe_IA           | 0.021         | 0.021  | 0.021  | 0.029  | 0.022         | 0.024  | 0.020 | 0.021  | 0.023  | 0.020 | 0.021   |       |
| Steppe_MLBA         | 0.018         | 0.017  | 0.017  | 0.017  | 0.016         | 0.018  | 0.016 | 0.018  | 0.018  | 0.016 | 0.018   |       |

We also used the more varied Illumina genotype dataset of East African populations from Pagani et al.<sup>1</sup> All sources outside the Levant are strongly rejected (Table S8.4) except for the Levant Neolithic and Bronze Age. Inferred mixture proportions are shown in Table S8.5; all populations have non-zero West Eurasian admixture except the Anuak, Gumuz, and Sudanese where the mixture proportion is not more than three standard errors higher than zero; these populations may have negligible or no West Eurasian admixture. In Extended Data Figure 4 we show mixture proportions for populations of both the Human Origins and Pagani data sets with the Neolithic Levant as a source.

**Table S8.4: Modeling East Africans in the Pagani dataset as a mix of Mota and an ancient population *A*. The P-value for rank=1 is shown for the triple Left=(*East African*, *Mota*, *A*) and Right=O8ENSW. P-values greater than 0.05 are highlighted in red and greater than 0.001 in yellow.**

|               | Anatolia_ChL | Anatolia_N | Armenia_ChL | Armenia_EBA | Armenia_MLBA | CHG      | Europe_EN | Europe_LNBA | Europe_MNChL | Iberia_BA | Iran_ChL |
|---------------|--------------|------------|-------------|-------------|--------------|----------|-----------|-------------|--------------|-----------|----------|
| Afar          | 2.49E-10     | 6.74E-10   | 7.16E-28    | 1.74E-24    | 8.40E-29     | 2.09E-47 | 1.65E-17  | 7.46E-38    | 1.01E-31     | 1.17E-21  | 1.56E-24 |
| Amhara        | 1.55E-11     | 1.02E-10   | 1.69E-31    | 7.96E-29    | 2.45E-33     | 2.58E-54 | 1.71E-19  | 3.98E-43    | 4.28E-36     | 1.09E-23  | 4.11E-29 |
| Anuak         | 6.75E-01     | 7.07E-01   | 6.70E-01    | 6.67E-01    | 6.71E-01     | 6.75E-01 | 7.43E-01  | 7.37E-01    | 8.11E-01     | 7.83E-01  | 6.61E-01 |
| Ariblacksmith | 5.56E-02     | 9.16E-02   | 1.24E-02    | 1.25E-02    | 4.69E-03     | 1.14E-04 | 1.77E-02  | 3.22E-04    | 5.83E-04     | 7.65E-04  | 1.99E-02 |
| Aricultivator | 3.19E-02     | 7.99E-02   | 2.65E-03    | 4.39E-03    | 1.04E-03     | 2.96E-06 | 1.08E-02  | 3.31E-05    | 7.76E-05     | 1.42E-04  | 6.92E-03 |
| Esomali       | 3.41E-09     | 2.60E-07   | 4.49E-18    | 5.27E-17    | 5.00E-20     | 1.23E-33 | 1.23E-12  | 5.90E-26    | 6.98E-23     | 3.78E-18  | 6.34E-17 |
| Gumuz         | 7.26E-01     | 7.14E-01   | 7.26E-01    | 7.28E-01    | 7.25E-01     | 7.12E-01 | 7.07E-01  | 7.05E-01    | 7.08E-01     | 7.07E-01  | 7.37E-01 |
| Oromo         | 1.06E-10     | 2.36E-09   | 7.45E-24    | 8.61E-23    | 2.71E-26     | 9.40E-43 | 3.61E-16  | 1.54E-33    | 2.49E-29     | 3.90E-21  | 9.18E-23 |
| Somali        | 3.07E-09     | 1.53E-07   | 3.03E-20    | 8.29E-19    | 1.35E-21     | 1.21E-35 | 2.11E-12  | 5.75E-27    | 1.57E-22     | 3.75E-18  | 1.12E-18 |
| Sudanese      | 7.48E-01     | 7.92E-01   | 7.41E-01    | 7.39E-01    | 7.43E-01     | 7.53E-01 | 8.28E-01  | 8.17E-01    | 8.91E-01     | 8.75E-01  | 7.29E-01 |
| Tygray        | 1.80E-09     | 1.80E-09   | 1.60E-29    | 1.26E-27    | 7.06E-32     | 3.08E-53 | 1.69E-18  | 5.43E-42    | 5.68E-36     | 5.25E-23  | 8.56E-27 |
| Wolayta       | 2.42E-06     | 1.08E-05   | 5.24E-12    | 5.02E-11    | 2.35E-13     | 2.29E-22 | 1.39E-09  | 3.70E-19    | 5.06E-17     | 1.34E-13  | 6.61E-11 |

  

|               | Iran_LN  | Iran_Hotulilb | Iran_N   | Iran_recent | Levant_BA | Levant_N | SHG      | Steppe_EMBA | Steppe_Eneolithic | Steppe_IA | Steppe_MLBA |
|---------------|----------|---------------|----------|-------------|-----------|----------|----------|-------------|-------------------|-----------|-------------|
| Afar          | 1.02E-14 | 2.82E-14      | 8.32E-33 | 2.83E-17    | 2.68E-02  | 2.38E-03 | 3.33E-45 | 7.42E-52    | 5.22E-56          | 2.16E-46  | 2.99E-41    |
| Amhara        | 1.88E-16 | 4.51E-16      | 4.29E-36 | 2.32E-20    | 1.89E-02  | 5.14E-03 | 4.08E-51 | 1.20E-59    | 4.32E-64          | 6.39E-53  | 4.86E-47    |
| Anuak         | 6.49E-01 | 6.42E-01      | 6.49E-01 | 6.70E-01    | 6.72E-01  | 6.78E-01 | 8.07E-01 | 6.72E-01    | 6.54E-01          | 6.80E-01  | 7.12E-01    |
| Ariblacksmith | 2.81E-04 | 7.51E-05      | 2.29E-04 | 1.12E-02    | 4.80E-01  | 7.01E-01 | 1.00E-05 | 4.10E-05    | 7.77E-06          | 4.25E-05  | 2.16E-04    |
| Aricultivator | 1.17E-05 | 3.39E-06      | 5.87E-06 | 6.25E-03    | 5.07E-01  | 5.20E-01 | 1.35E-07 | 6.11E-07    | 2.90E-08          | 7.12E-07  | 1.48E-05    |
| Esomali       | 8.60E-17 | 3.11E-14      | 3.57E-29 | 1.23E-14    | 4.39E-02  | 4.72E-02 | 9.41E-33 | 2.00E-34    | 8.10E-38          | 4.52E-33  | 4.09E-28    |
| Gumuz         | 7.25E-01 | 7.67E-01      | 7.25E-01 | 7.28E-01    | 7.39E-01  | 7.40E-01 | 7.12E-01 | 7.14E-01    | 7.18E-01          | 7.13E-01  | 7.07E-01    |
| Oromo         | 1.52E-16 | 2.34E-15      | 3.73E-34 | 8.52E-18    | 7.29E-03  | 4.89E-03 | 1.07E-41 | 2.96E-45    | 1.91E-49          | 2.83E-42  | 2.41E-36    |
| Somali        | 5.66E-18 | 6.54E-15      | 1.03E-31 | 1.01E-14    | 9.30E-03  | 1.69E-02 | 9.31E-34 | 2.62E-37    | 3.63E-41          | 9.34E-35  | 1.93E-29    |
| Sudanese      | 7.11E-01 | 6.60E-01      | 7.06E-01 | 7.39E-01    | 7.46E-01  | 7.47E-01 | 8.73E-01 | 7.33E-01    | 6.95E-01          | 7.51E-01  | 7.88E-01    |
| Tygray        | 1.06E-14 | 4.62E-14      | 1.18E-33 | 1.71E-18    | 1.55E-01  | 1.66E-03 | 3.58E-50 | 6.60E-58    | 1.44E-61          | 2.35E-51  | 1.08E-45    |
| Wolayta       | 2.16E-14 | 2.85E-12      | 2.22E-20 | 1.97E-09    | 5.67E-02  | 1.37E-02 | 1.23E-25 | 1.60E-25    | 2.83E-29          | 4.15E-24  | 1.43E-20    |

**Table S8.5: Mixture proportions of West Eurasian ancestry for East African populations in the Pagani dataset.** Mixture proportions less than 3 standard errors from zero are highlighted. Mixture proportions are valid for those combinations of *East African* populations (column) and source populations *A* where rank=1 is supported for the triple (*East African*, *Mota*, *A*) according to Table S8.4.

|                     | Afar              | Amhara | Anuak  | Ariblacksmith | Aricultivator | Esomali | Gumuz | Oromo  | Somali | Sudanese | Tygray | Wolayta |       |
|---------------------|-------------------|--------|--------|---------------|---------------|---------|-------|--------|--------|----------|--------|---------|-------|
| Mixture Proportions | Anatolia_ChL      | 0.432  | 0.431  | -0.012        | 0.129         | 0.154   | 0.333 | 0.011  | 0.369  | 0.347    | -0.020 | 0.449   | 0.297 |
|                     | Anatolia_N        | 0.400  | 0.407  | -0.016        | 0.127         | 0.153   | 0.323 | 0.007  | 0.349  | 0.331    | -0.024 | 0.424   | 0.280 |
|                     | Armenia_ChL       | 0.381  | 0.389  | -0.011        | 0.124         | 0.148   | 0.298 | 0.011  | 0.328  | 0.304    | -0.020 | 0.402   | 0.273 |
|                     | Armenia_EBA       | 0.430  | 0.445  | -0.012        | 0.138         | 0.166   | 0.339 | 0.013  | 0.373  | 0.344    | -0.022 | 0.457   | 0.308 |
|                     | Armenia_MLBA      | 0.385  | 0.395  | -0.012        | 0.122         | 0.148   | 0.301 | 0.011  | 0.333  | 0.309    | -0.020 | 0.410   | 0.276 |
|                     | CHG               | 0.449  | 0.477  | -0.015        | 0.128         | 0.160   | 0.330 | 0.008  | 0.378  | 0.347    | -0.027 | 0.493   | 0.310 |
|                     | Europe_EN         | 0.351  | 0.359  | -0.019        | 0.111         | 0.137   | 0.283 | 0.003  | 0.308  | 0.293    | -0.025 | 0.375   | 0.247 |
|                     | Europe_LNBA       | 0.242  | 0.251  | -0.016        | 0.079         | 0.100   | 0.195 | 0.001  | 0.215  | 0.205    | -0.021 | 0.259   | 0.177 |
|                     | Europe_MNChL      | 0.259  | 0.266  | -0.021        | 0.081         | 0.103   | 0.207 | -0.003 | 0.226  | 0.219    | -0.026 | 0.276   | 0.183 |
|                     | Iberia_BA         | 0.310  | 0.315  | -0.019        | 0.083         | 0.106   | 0.237 | -0.002 | 0.260  | 0.245    | -0.025 | 0.325   | 0.202 |
|                     | Iran_ChL          | 0.551  | 0.560  | -0.012        | 0.170         | 0.204   | 0.427 | 0.018  | 0.470  | 0.434    | -0.024 | 0.582   | 0.382 |
|                     | Iran_LN           | 0.956  | 0.978  | -0.009        | 0.192         | 0.235   | 0.739 | 0.020  | 0.846  | 0.788    | -0.027 | 1.010   | 0.574 |
|                     | Iran_Hotulllb     | 0.865  | 0.882  | 0.005         | 0.152         | 0.199   | 0.645 | 0.026  | 0.745  | 0.724    | -0.007 | 0.934   | 0.536 |
|                     | Iran_N            | 0.868  | 0.943  | -0.010        | 0.169         | 0.209   | 0.472 | 0.019  | 0.623  | 0.478    | -0.025 | 0.968   | 0.416 |
|                     | Iran_recent       | 0.482  | 0.483  | -0.013        | 0.139         | 0.170   | 0.367 | 0.013  | 0.404  | 0.383    | -0.021 | 0.509   | 0.326 |
|                     | Levant_BA         | 0.504  | 0.511  | -0.013        | 0.162         | 0.190   | 0.404 | 0.015  | 0.440  | 0.414    | -0.023 | 0.527   | 0.353 |
|                     | Levant_N          | 0.417  | 0.424  | -0.012        | 0.139         | 0.161   | 0.337 | 0.013  | 0.365  | 0.347    | -0.019 | 0.437   | 0.292 |
|                     | SHG               | 0.132  | 0.137  | -0.014        | 0.039         | 0.053   | 0.103 | -0.003 | 0.114  | 0.111    | -0.016 | 0.143   | 0.092 |
|                     | Steppe_EMBA       | 0.185  | 0.193  | -0.009        | 0.070         | 0.088   | 0.158 | 0.005  | 0.171  | 0.161    | -0.014 | 0.203   | 0.150 |
|                     | Steppe_Eneolithic | 0.127  | 0.133  | -0.005        | 0.048         | 0.061   | 0.108 | 0.005  | 0.118  | 0.110    | -0.008 | 0.145   | 0.101 |
| Steppe_IA           | 0.266             | 0.283  | -0.012 | 0.084         | 0.104         | 0.200   | 0.006 | 0.229  | 0.209  | -0.019   | 0.291  | 0.193   |       |
| Steppe_MLBA         | 0.230             | 0.240  | -0.014 | 0.078         | 0.098         | 0.187   | 0.003 | 0.206  | 0.196  | -0.019   | 0.248  | 0.173   |       |
| Standard Errors     | Anatolia_ChL      | 0.023  | 0.021  | 0.021         | 0.019         | 0.018   | 0.021 | 0.020  | 0.020  | 0.021    | 0.021  | 0.021   | 0.020 |
|                     | Anatolia_N        | 0.015  | 0.013  | 0.020         | 0.018         | 0.016   | 0.016 | 0.020  | 0.014  | 0.015    | 0.020  | 0.013   | 0.016 |
|                     | Armenia_ChL       | 0.022  | 0.021  | 0.021         | 0.020         | 0.018   | 0.020 | 0.021  | 0.019  | 0.020    | 0.022  | 0.020   | 0.019 |
|                     | Armenia_EBA       | 0.023  | 0.023  | 0.024         | 0.022         | 0.019   | 0.022 | 0.023  | 0.021  | 0.021    | 0.024  | 0.023   | 0.021 |
|                     | Armenia_MLBA      | 0.023  | 0.021  | 0.022         | 0.020         | 0.018   | 0.021 | 0.021  | 0.020  | 0.021    | 0.022  | 0.022   | 0.020 |
|                     | CHG               | 0.046  | 0.043  | 0.027         | 0.027         | 0.024   | 0.040 | 0.027  | 0.038  | 0.037    | 0.028  | 0.045   | 0.031 |
|                     | Europe_EN         | 0.015  | 0.014  | 0.019         | 0.017         | 0.016   | 0.016 | 0.019  | 0.014  | 0.015    | 0.019  | 0.014   | 0.016 |
|                     | Europe_LNBA       | 0.015  | 0.015  | 0.016         | 0.015         | 0.014   | 0.015 | 0.016  | 0.014  | 0.015    | 0.016  | 0.014   | 0.015 |
|                     | Europe_MNChL      | 0.015  | 0.014  | 0.016         | 0.015         | 0.014   | 0.015 | 0.016  | 0.014  | 0.014    | 0.016  | 0.014   | 0.015 |
|                     | Iberia_BA         | 0.020  | 0.018  | 0.016         | 0.016         | 0.015   | 0.019 | 0.016  | 0.017  | 0.018    | 0.016  | 0.019   | 0.017 |
|                     | Iran_ChL          | 0.029  | 0.026  | 0.029         | 0.025         | 0.023   | 0.026 | 0.028  | 0.025  | 0.025    | 0.029  | 0.027   | 0.025 |
|                     | Iran_LN           | 0.103  | 0.105  | 0.038         | 0.044         | 0.042   | 0.113 | 0.038  | 0.101  | 0.128    | 0.039  | 0.106   | 0.083 |
|                     | Iran_Hotulllb     | 0.123  | 0.129  | 0.032         | 0.044         | 0.042   | 0.105 | 0.032  | 0.116  | 0.118    | 0.033  | 0.129   | 0.087 |
|                     | Iran_N            | 0.146  | 0.174  | 0.035         | 0.035         | 0.032   | 0.090 | 0.035  | 0.185  | 0.087    | 0.036  | 0.143   | 0.053 |
|                     | Iran_recent       | 0.027  | 0.026  | 0.024         | 0.022         | 0.020   | 0.025 | 0.023  | 0.025  | 0.025    | 0.024  | 0.026   | 0.023 |
|                     | Levant_BA         | 0.019  | 0.017  | 0.024         | 0.021         | 0.019   | 0.019 | 0.023  | 0.017  | 0.019    | 0.024  | 0.017   | 0.019 |
|                     | Levant_N          | 0.016  | 0.015  | 0.020         | 0.018         | 0.016   | 0.016 | 0.019  | 0.015  | 0.016    | 0.020  | 0.015   | 0.016 |
|                     | SHG               | 0.011  | 0.011  | 0.010         | 0.010         | 0.009   | 0.010 | 0.010  | 0.010  | 0.010    | 0.010  | 0.011   | 0.010 |
|                     | Steppe_EMBA       | 0.017  | 0.017  | 0.016         | 0.016         | 0.014   | 0.016 | 0.016  | 0.016  | 0.016    | 0.016  | 0.016   | 0.016 |
|                     | Steppe_Eneolithic | 0.015  | 0.016  | 0.013         | 0.013         | 0.012   | 0.014 | 0.013  | 0.014  | 0.014    | 0.013  | 0.015   | 0.014 |
| Steppe_IA           | 0.028             | 0.029  | 0.019  | 0.019         | 0.017         | 0.023   | 0.019 | 0.024  | 0.023  | 0.020    | 0.028  | 0.022   |       |
| Steppe_MLBA         | 0.016             | 0.015  | 0.016  | 0.016         | 0.014         | 0.015   | 0.016 | 0.015  | 0.015  | 0.016    | 0.015  | 0.015   |       |

## References

1. Pagani, L. *et al.* Ethiopian Genetic Diversity Reveals Linguistic Stratification and Complex Influences on the Ethiopian Gene Pool. *Am. J. Hum. Genet.* **91**, 83-96, (2012).
2. Pickrell, J. K. *et al.* Ancient west Eurasian ancestry in southern and eastern Africa. *Proc. Natl. Acad. Sci. USA* **111**, 2632–2637, (2014).
3. Llorente, M. G. *et al.* Ancient Ethiopian genome reveals extensive Eurasian admixture throughout the African continent. *Science* **350**, 820-822, (2015).
4. Patterson, N. *et al.* Ancient admixture in human history. *Genetics* **192**, 1065-1093, (2012).
5. Haak, W. *et al.* Massive migration from the steppe was a source for Indo-European languages in Europe. *Nature* **522**, 207-211, (2015).



## Supplementary Information 9

### Constraints on the origin of Ancestral North Indians

Previous studies<sup>1,2</sup> have uncovered evidence of admixture in South Asian populations from an “Ancestral North Indian” (ANI) source that is related to West Eurasian populations. It has been proposed that populations of the Caucasus such as Georgians were related to the ANI<sup>1,3</sup>, a claim that has found additional support by the analysis of the Caucasus hunter-gatherers (CHG) from Georgia<sup>4</sup> which appear to be a source of ancestry for South Asian populations. However, South Asia is also linked to the Eurasian steppe<sup>5</sup> by the analysis of Y-chromosomes which detected the presence of Y-chromosome haplogroup R1a1a1b2-Z93 as a common element in ancient Bronze Age populations of eastern Europe<sup>5</sup>, Mongolia<sup>6</sup>, and Central<sup>7</sup>/South Asia<sup>8</sup> and which may mark spread of Indo-European languages eastward as suggested by the steppe origin theory of Indo-European languages<sup>9</sup>.

The admixture history of ANI into the Indian subcontinent is likely to be complex, as there is evidence of more than one layer of admixture within the last 4,000 years<sup>1</sup>. Moreover, unlike Europe where a substantial number of pre-agricultural hunter-gatherers is available for study<sup>4,5,10-16</sup>, the earliest population substratum of the “Ancestral South Indians” (ASI) is only indirectly known by its distant relationship<sup>2</sup> to the Onge hunter-gatherers from the Andaman Islands<sup>17</sup>, a population that may be an imperfect proxy for the ASI. There is also evidence that Indian populations have ancestry related to Austroasiatic and Tibeto-Burman groups<sup>2,18</sup>, although many of them can be modeled as a simpler mixture involving only the ANI-ASI ancestral populations<sup>1,2</sup>.

In this section as in Supplementary Information, section 11 which deals with East Asians, for which there is also a lack of ancient DNA, we do not seek to solve the problem of their population history completely. Rather, we investigate whether the ANI could correspond to any of the numerous ancient populations of West Eurasia or to their combinations, using the qpAdm/qpWave methodology<sup>12</sup>. We use the following set of outgroups:

**S7:** Ust\_Ishim, Kostenki14, MA1, Papuan, Chukchi, Karitiana, Mbuti

Note that this set corresponds to the O9 set introduced in Supplementary Information, section 7, but we have removed from it the Onge and the Han, as we wish to be able to use these populations to model admixture from ASI and/or East and Southeast Asian populations into South Asia.

We first set Left=(*South Asian*, *West Eurasian*, Onge, Han) and Right=S7, iterating between all *West Eurasian* and *South Asian* populations. If *South Asian* can be modeled as a 3-way mixture of *West Eurasian*, Onge, and Han, then the Left set will be consistent with 3 streams of ancestry. In particular, if the ANI portion of *South Asian* does not form a clade with *West Eurasian* and the

ASI/Southeast/East Asian portion of *South Asian* includes any ancestry that interacts with the S7 outgroups not via populations like the Onge, Han, then including *South Asian* into the set of outgroups will not be consistent with 3 streams of ancestry. Our goal is to reject possible sources of ancestry for the ANI, without making a strong claim about its identity. In Table S9.1 we show the p-value for rank=2 for different choices of *South Asian* and *West Eurasian*; this can be rejected in the great majority of cases, suggesting that no single population can account for ANI across South Asia.

We next tried all possible  $\binom{20}{2} = 190$  pairs of the 20 *West Eurasian* populations of Table S9.1, thus Left=(*South Asian*, *West Eurasian*<sub>1</sub>, *West Eurasian*<sub>2</sub>, Onge, Han). South Asian populations could not be modeled as mixtures of most of the 190 quadruples (pairs of West Eurasian populations plus Onge and Han). In Table S9.2 we list the 49 pairs which resulted in successful modeling of at least 4 South Asian populations (p-value for rank=3 greater or equal to 0.05 and estimated mixture proportions in [0, 1] interval). A clear pattern emerges with the most successful pairs involving a population from Iran/the Near East and one from the Steppe/Eastern Europe. The fact that the Eastern European population is either EHG, Steppe\_Eneolithic, or Steppe\_EMBA is not surprising, as Steppe\_Eneolithic and Steppe\_EMBA groups are themselves mixtures of EHG and Iran-related populations as we have seen in Supplementary Information, section 7.

There is, however, uncertainty about the source of the Near Eastern-related component, as numerous South Asians can be modeled as having either Iran\_N or Levant\_N ancestry. We can introduce additional outgroups to the Right set to better distinguish between these choices. We add Natufians to the set of outgroups as it shares more alleles with Levant\_N than with any other population (Supplementary Information, section 7) and can thus help differentiate between Levantine and other ancestry. We also add Switzerland\_HG to help distinguish between the populations of Iran and those of Armenia and the Caucasus, all of which share more alleles with European hunter-gatherers than the Neolithic of Iran did (Supplementary Information, section 7). The new set of Right populations is:

**S7NS:** Ust\_Ishim, Kostenki14, MA1, Papuan, Chukchi, Karitiana, Mbuti, Natufian, Switzerland\_HG

In Table S9.3 we see that only 12 pairs of West Eurasian populations can be used to model at least 4 South Asian populations. All these pairs involve a steppe population and a population from Iran or CHG. Only steppe/Iran combinations can model all or nearly all South Asian populations successfully. In Table S9.4 we list the inferred mixture proportions for the top 3 pairs that can be used to model nearly all South Asian populations in our dataset. Ancestry from both Iran and Steppe-related sources is pervasive across South Asia. Estimated proportions of EHG ancestry are lower than Steppe\_Eneolithic ancestry which are lower than Steppe\_EMBA ancestry, consistent with the dilution

of EHG ancestry from a southern source<sup>5</sup> related to populations of Iran (Supplementary Information, section 7), thus more Steppe ancestry is required when the Steppe source has less EHG ancestry.

In Extended Data Fig. 4 we plot mixture proportions using Iran\_N and Steppe\_EMBA as sources as these source populations have the greatest sample sizes. Nonetheless, we do not claim that any particular pair of populations is directly ancestry to South Asian populations. This section places constraints on the possible sources of ANI ancestry in India by showing that single populations of ancient West Eurasia are not feasible sources (Table S9.1) while pairs of populations involving Steppe/Iran ancestry are (Tables S9.2 and S9.3). The geographical interpretation of this finding is unclear; mixtures of Steppe/Iran-related ancestry (such as Steppe\_EMBA and Steppe\_Eneolithic) were formed in West Eurasia and it is possible that a currently unsampled such mixed population is responsible for the ANI ancestry in South Asia. Alternatively, admixture may have taken place by combinations of Steppe/Iran-related groups in central or south Asia.

The analysis in this section reconciles the evidence presented in the first paragraph regarding the origin of the ANI by showing that it may be related both to “southern” populations related to Iran and the Caucasus and to “northern” steppe populations. Our results do not resolve the relationship between ANI and the origin of Indo-European speakers in South Asia, in the sense that they reveal that South Asian populations have ancestry both from regions related to the Eurasian steppe and ancient Iran, which is compatible with alternative homeland solutions<sup>12</sup>. West Eurasian-related ANI ancestry in South Asia may pre-date, coincide with, or postdate Indo-European dispersals, although a partial link between the two is suggested by the evidence for Bronze Age admixture in India<sup>1</sup> that contributed a large portion of ancestry especially in Indo-European speakers<sup>1,2</sup> whose magnitude would be compatible with major linguistic change. However, ANI ancestry related to both ancient Iran and the steppe is found across South Asia (Table S9.4) making it difficult to associate it strongly with any particular language family (Indo-European or otherwise). Nonetheless, the fact that we can reject West Eurasian population sources from Anatolia, mainland Europe, and the Levant diminishes the likelihood that these areas were sources of Indo-European (or other) languages in South Asia. While the Early/Middle Bronze Age ‘Yamnaya’-related group (Steppe\_EMBA) is a good genetic match (together with Neolithic Iran) for ANI, the later Middle/Late Bronze Age steppe population (Steppe\_MLBA) is not. Steppe\_MLBA includes Sintashta and Andronovo populations who have been proposed as identical to or related to ancestral Indo-Iranians<sup>9,19</sup>, as well as the Srubnaya from eastern Europe which are related to South Asians by their possession of Y-chromosome haplogroup R1a1a1b2-Z93<sup>5</sup>. A useful direction of future research is a more comprehensive sampling of ancient DNA from steppe populations, as well as populations of central Asia (east of Iran and south of the steppe), which may reveal more proximate sources of the ANI than the ones considered here, and of South Asia to determine the trajectory of population change in the area directly.

**Table S9.1: Modeling *South Asian* populations as a mix of *West Eurasian* plus *Onge* and *Han* using  $\text{Right}=\text{S7}$ . We show the p-value for rank=2 for  $\text{Left}=(\text{South Asian}, \text{West Eurasian}, \text{Onge}, \text{Han})$ . No *West Eurasian* populations appear to be the single source of ANI ancestry across South Asia.**

|                | Anatolia_ChL | Anatolia_N | Armenia_ChL | Armenia_EBA | Armenia_MLBA | CHG     | EHG     | Europe_EN | Europe_LNBA | Europe_MNChL | Iran_ChL | Iran_LN | Iran_N  | Levant_BA | Levant_N | SHG     | Steppe_EMBA | Steppe_Eneolithic | Steppe_MLBA | WHG     |
|----------------|--------------|------------|-------------|-------------|--------------|---------|---------|-----------|-------------|--------------|----------|---------|---------|-----------|----------|---------|-------------|-------------------|-------------|---------|
| Balochi        | 2.8E-03      | 1.4E-33    | 9.1E-06     | 7.6E-04     | 3.4E-01      | 3.3E-03 | 5.2E-64 | 5.7E-37   | 1.3E-32     | 1.3E-34      | 2.3E-05  | 1.8E-06 | 1.7E-07 | 1.7E-16   | 4.0E-26  | 2.7E-51 | 1.7E-56     | 1.5E-44           | 1.3E-33     | 1.9E-57 |
| Bengali        | 2.0E-04      | 2.9E-14    | 8.7E-03     | 4.0E-05     | 2.7E-02      | 1.3E-04 | 3.7E-16 | 3.3E-14   | 6.1E-03     | 4.6E-12      | 8.6E-08  | 1.1E-08 | 9.1E-11 | 1.8E-13   | 1.1E-19  | 2.0E-10 | 2.0E-05     | 2.0E-10           | 1.4E-02     | 1.0E-17 |
| Brahmin_Tiwari | 1.1E-09      | 1.2E-53    | 3.6E-10     | 1.8E-17     | 3.4E-10      | 8.9E-13 | 1.4E-26 | 1.8E-54   | 3.3E-09     | 1.2E-44      | 1.7E-27  | 4.8E-19 | 3.9E-22 | 3.1E-43   | 6.8E-56  | 4.8E-15 | 1.6E-07     | 4.1E-14           | 5.4E-04     | 5.1E-35 |
| Brahui         | 2.3E-03      | 3.3E-33    | 5.7E-08     | 8.6E-05     | 5.1E-02      | 1.3E-03 | 6.0E-66 | 1.1E-33   | 1.4E-39     | 2.4E-36      | 3.2E-05  | 1.2E-05 | 8.4E-07 | 2.0E-14   | 1.6E-23  | 3.0E-53 | 2.2E-59     | 1.5E-49           | 2.6E-40     | 1.5E-58 |
| Burusho        | 5.9E-09      | 9.5E-60    | 3.0E-09     | 2.1E-16     | 1.7E-09      | 1.9E-11 | 8.3E-37 | 8.8E-61   | 1.1E-11     | 1.0E-49      | 1.5E-28  | 1.2E-16 | 3.9E-21 | 5.3E-43   | 2.8E-53  | 2.2E-22 | 4.7E-14     | 5.8E-20           | 7.9E-07     | 8.2E-41 |
| GujaratiA      | 2.3E-06      | 5.8E-32    | 7.8E-05     | 8.9E-12     | 5.6E-06      | 1.4E-08 | 1.1E-29 | 4.4E-29   | 3.8E-03     | 3.9E-24      | 9.6E-18  | 4.2E-14 | 1.6E-18 | 1.1E-29   | 4.0E-41  | 2.4E-15 | 3.2E-10     | 3.7E-17           | 1.1E-02     | 1.1E-26 |
| GujaratiB      | 2.1E-06      | 2.3E-23    | 4.0E-04     | 1.9E-08     | 4.3E-04      | 8.3E-07 | 1.8E-24 | 4.3E-24   | 2.0E-03     | 6.2E-19      | 9.2E-13  | 2.9E-13 | 2.7E-14 | 1.7E-22   | 2.2E-30  | 1.5E-13 | 7.8E-08     | 6.2E-15           | 1.6E-02     | 5.3E-24 |
| GujaratiC      | 9.7E-07      | 3.2E-24    | 7.7E-06     | 2.2E-09     | 2.3E-05      | 3.6E-08 | 8.0E-18 | 4.9E-24   | 2.6E-04     | 9.4E-20      | 4.5E-13  | 4.1E-14 | 1.3E-15 | 3.0E-22   | 3.7E-30  | 9.7E-11 | 8.3E-05     | 1.5E-10           | 1.0E-02     | 3.7E-23 |
| GujaratiD      | 4.4E-04      | 9.3E-15    | 3.1E-02     | 2.6E-05     | 3.1E-02      | 1.4E-04 | 3.2E-17 | 1.7E-14   | 3.5E-02     | 2.8E-11      | 1.8E-07  | 6.9E-10 | 7.2E-11 | 1.1E-14   | 1.6E-20  | 3.1E-09 | 1.1E-05     | 3.0E-11           | 5.0E-02     | 1.0E-15 |
| Jew_Cochin     | 3.7E-02      | 1.4E-09    | 4.5E-03     | 1.9E-01     | 6.6E-01      | 3.1E-01 | 4.1E-42 | 1.1E-10   | 1.3E-12     | 1.7E-12      | 1.1E-01  | 2.2E-03 | 4.7E-04 | 6.9E-06   | 6.2E-12  | 3.6E-29 | 9.9E-27     | 6.6E-33           | 2.0E-15     | 1.7E-30 |
| Kalash         | 2.2E-08      | 1.1E-51    | 1.3E-08     | 2.1E-15     | 3.4E-09      | 3.4E-12 | 1.4E-30 | 5.1E-50   | 5.9E-09     | 2.8E-39      | 1.0E-24  | 1.5E-16 | 4.0E-20 | 1.1E-37   | 5.2E-49  | 1.1E-17 | 1.1E-11     | 2.8E-18           | 3.7E-05     | 2.3E-36 |
| Kharia         | 2.1E-01      | 4.2E-02    | 4.0E-01     | 4.6E-01     | 7.1E-01      | 3.9E-01 | 6.9E-04 | 3.5E-02   | 2.2E-01     | 3.6E-02      | 4.8E-01  | 7.7E-02 | 1.6E-01 | 9.7E-02   | 2.3E-02  | 6.3E-03 | 8.8E-02     | 6.0E-03           | 2.3E-01     | 3.4E-04 |
| Kusunda        | 2.1E-01      | 1.9E-02    | 2.6E-01     | 2.7E-01     | 3.9E-01      | 1.4E-01 | 5.6E-05 | 2.0E-02   | 1.6E-01     | 2.7E-02      | 2.2E-01  | 1.1E-02 | 2.2E-02 | 3.1E-02   | 5.2E-03  | 1.9E-03 | 3.6E-02     | 1.3E-03           | 1.4E-01     | 6.8E-05 |
| Lodhi          | 9.6E-07      | 8.8E-23    | 2.2E-05     | 2.2E-09     | 1.2E-04      | 1.1E-07 | 2.3E-16 | 8.2E-23   | 6.5E-05     | 3.9E-19      | 2.5E-13  | 5.6E-13 | 2.3E-15 | 6.2E-21   | 2.2E-27  | 2.2E-11 | 3.2E-05     | 3.2E-11           | 2.6E-03     | 2.7E-22 |
| Makrani        | 1.3E-04      | 2.1E-46    | 1.2E-19     | 4.5E-07     | 2.1E-07      | 2.6E-05 | 3.5E-88 | 8.8E-49   | 4.7E-80     | 9.2E-58      | 6.3E-04  | 2.8E-03 | 7.2E-03 | 4.3E-10   | 3.3E-15  | 2.5E-83 | 5.9E-90     | 2.1E-68           | 3.8E-76     | 6.6E-81 |
| Mala           | 1.4E-03      | 1.9E-09    | 4.8E-02     | 1.4E-03     | 1.6E-01      | 2.2E-03 | 2.4E-12 | 2.2E-09   | 3.2E-02     | 5.6E-08      | 1.7E-04  | 6.5E-08 | 4.1E-08 | 4.0E-09   | 1.7E-13  | 1.2E-07 | 2.5E-04     | 2.7E-08           | 4.1E-02     | 6.8E-13 |
| Pathan         | 7.9E-07      | 3.1E-56    | 1.3E-06     | 9.1E-13     | 4.7E-06      | 4.0E-09 | 3.5E-44 | 5.6E-54   | 1.3E-13     | 6.6E-45      | 1.2E-21  | 1.6E-13 | 4.5E-18 | 6.6E-36   | 3.2E-50  | 3.0E-28 | 4.4E-24     | 1.3E-25           | 2.7E-10     | 1.3E-45 |
| Punjabi        | 8.6E-06      | 3.9E-20    | 4.1E-04     | 8.8E-07     | 2.1E-03      | 2.4E-05 | 2.8E-22 | 7.9E-20   | 2.0E-04     | 7.2E-17      | 1.8E-10  | 1.9E-11 | 2.3E-13 | 3.4E-18   | 6.7E-26  | 4.8E-14 | 2.8E-08     | 6.3E-14           | 4.2E-04     | 8.9E-23 |
| Sindhi         | 1.3E-05      | 1.5E-44    | 1.2E-05     | 1.4E-09     | 1.9E-04      | 4.4E-07 | 6.4E-42 | 1.5E-43   | 9.4E-15     | 3.8E-40      | 1.9E-16  | 1.2E-12 | 9.9E-15 | 1.2E-27   | 3.3E-39  | 5.4E-30 | 2.0E-25     | 7.4E-28           | 4.1E-12     | 2.4E-44 |
| Vishwabrahmin  | 1.5E-05      | 1.0E-15    | 2.4E-04     | 1.9E-05     | 9.2E-03      | 3.6E-05 | 4.4E-16 | 7.4E-16   | 1.9E-05     | 1.2E-14      | 5.7E-07  | 6.7E-09 | 3.8E-09 | 9.6E-13   | 1.6E-17  | 9.2E-12 | 1.2E-06     | 6.6E-11           | 1.1E-04     | 1.2E-20 |

**Table S9.2: Pairs of West Eurasian populations (out of  $\binom{20}{2} = 190$  choices) and the number of South Asian populations (out of a total of 20) that could be modeled as 4-way mixtures involving each pair plus Onge and Han using the S7 outgroups. We show only population pairs that can be used to model at least 4 South Asian populations (for Left=(*South Asian*, *West Eurasian*<sub>1</sub>, *West Eurasian*<sub>2</sub>, Onge, Han) we have p-value for rank=3 greater or equal to 0.05 and estimated mixture proportions in [0, 1] interval).**

| Number of South Asian populations modeled as mixtures of <i>Pair</i> , Onge, and Han | <i>Pair</i>                    |
|--------------------------------------------------------------------------------------|--------------------------------|
| 20                                                                                   | Iran_N:Steppe_Eneolithic       |
| 20                                                                                   | Iran_N:Steppe_EMBA             |
| 20                                                                                   | Iran_LN:Steppe_Eneolithic      |
| 20                                                                                   | EHG:Iran_LN                    |
| 19                                                                                   | Iran_LN:Steppe_EMBA            |
| 19                                                                                   | EHG:Iran_N                     |
| 18                                                                                   | Iran_ChL:Steppe_Eneolithic     |
| 17                                                                                   | Iran_ChL:Steppe_EMBA           |
| 16                                                                                   | Levant_N:Steppe_Eneolithic     |
| 16                                                                                   | Levant_BA:Steppe_Eneolithic    |
| 16                                                                                   | EHG:Iran_ChL                   |
| 15                                                                                   | Levant_N:Steppe_EMBA           |
| 14                                                                                   | Armenia_EBA:EHG                |
| 13                                                                                   | EHG:Levant_N                   |
| 13                                                                                   | Armenia_EBA:Steppe_Eneolithic  |
| 12                                                                                   | Levant_BA:Steppe_EMBA          |
| 12                                                                                   | CHG:Steppe_Eneolithic          |
| 12                                                                                   | CHG:Steppe_EMBA                |
| 12                                                                                   | Armenia_EBA:Steppe_EMBA        |
| 11                                                                                   | EHG:Levant_BA                  |
| 11                                                                                   | CHG:EHG                        |
| 11                                                                                   | Armenia_MLBA:Steppe_EMBA       |
| 10                                                                                   | Armenia_MLBA:Steppe_Eneolithic |
| 9                                                                                    | Iran_N:Steppe_MLBA             |
| 8                                                                                    | Levant_N:Steppe_MLBA           |
| 8                                                                                    | Iran_LN:Steppe_MLBA            |
| 8                                                                                    | Iran_ChL:Steppe_MLBA           |
| 8                                                                                    | CHG:Steppe_MLBA                |
| 8                                                                                    | Armenia_MLBA:EHG               |
| 8                                                                                    | Armenia_EBA:Steppe_MLBA        |
| 7                                                                                    | Levant_BA:Steppe_MLBA          |
| 7                                                                                    | Iran_N:SHG                     |
| 7                                                                                    | Armenia_ChL:Steppe_Eneolithic  |
| 7                                                                                    | Armenia_ChL:Steppe_EMBA        |
| 7                                                                                    | Armenia_ChL:EHG                |
| 7                                                                                    | Anatolia_ChL:Steppe_Eneolithic |
| 7                                                                                    | Anatolia_ChL:Steppe_EMBA       |
| 6                                                                                    | Armenia_MLBA:Steppe_MLBA       |
| 6                                                                                    | Armenia_MLBA:SHG               |
| 6                                                                                    | Anatolia_N:Steppe_EMBA         |
| 6                                                                                    | Anatolia_ChL:EHG               |
| 5                                                                                    | Iran_ChL:SHG                   |
| 4                                                                                    | Iran_LN:SHG                    |
| 4                                                                                    | Europe_LNBA:Iran_N             |
| 4                                                                                    | Europe_LNBA:Iran_ChL           |
| 4                                                                                    | Europe_EN:Steppe_EMBA          |
| 4                                                                                    | Armenia_ChL:Steppe_MLBA        |
| 4                                                                                    | Anatolia_N:Steppe_Eneolithic   |
| 4                                                                                    | Anatolia_ChL:Steppe_MLBA       |

**Table S9.3: Pairs of West Eurasian populations (out of  $\binom{20}{2} = 190$  choices) and the number of South Asian populations (out of a total of 20) that could be modeled as 4-way mixtures involving each pair plus Onge and Han using the S7NS outgroups.** We show only population pairs that can be used to model at least 4 South Asian populations (for Left=(*South Asian*, *West Eurasian*<sub>1</sub>, *West Eurasian*<sub>2</sub>, Onge, Han) we have p-value for rank=3 greater or equal to 0.05 and estimated mixture proportions in [0, 1] interval).

| Number of South Asian populations modeled as mixtures of <i>Pair</i> , Onge, and Han | <i>Pair</i>                |
|--------------------------------------------------------------------------------------|----------------------------|
| 20                                                                                   | Iran_LN:Steppe_Eneolithic  |
| 20                                                                                   | EHG:Iran_LN                |
| 19                                                                                   | Iran_N:Steppe_EMBA         |
| 18                                                                                   | Iran_N:Steppe_Eneolithic   |
| 16                                                                                   | Iran_LN:Steppe_EMBA        |
| 15                                                                                   | EHG:Iran_N                 |
| 12                                                                                   | Iran_ChL:Steppe_Eneolithic |
| 12                                                                                   | CHG:Steppe_Eneolithic      |
| 10                                                                                   | EHG:Iran_ChL               |
| 9                                                                                    | CHG:EHG                    |
| 8                                                                                    | Iran_ChL:Steppe_EMBA       |
| 8                                                                                    | CHG:Steppe_EMBA            |

**Table S9.4: Mixture proportions for South Asian populations.**

| South Asian    | Mixture Proportions |         |                   |       | Standard Errors |         |                   |       | Mixture Proportions |                    |         |       | Standard Errors |       |         |       | Mixture Proportions |       |                    |        | Standard Errors |       |       |        |             |       |       |
|----------------|---------------------|---------|-------------------|-------|-----------------|---------|-------------------|-------|---------------------|--------------------|---------|-------|-----------------|-------|---------|-------|---------------------|-------|--------------------|--------|-----------------|-------|-------|--------|-------------|-------|-------|
|                | P-value for rank=3  | Iran_LN | Steppe_Eneolithic | Onge  | Han             | Iran_LN | Steppe_Eneolithic | Onge  | Han                 | P-value for rank=3 | Iran_LN | EHG   | Onge            | Han   | Iran_LN | EHG   | Onge                | Han   | P-value for rank=3 | Iran_N | Steppe_EMBA     | Onge  | Han   | Iran_N | Steppe_EMBA | Onge  | Han   |
| Balochi        | 8.47E-01            | 0.605   | 0.269             | 0.091 | 0.035           | 0.036   | 0.031             | 0.034 | 0.025               | 7.43E-01           | 0.662   | 0.204 | 0.094           | 0.040 | 0.033   | 0.026 | 0.037               | 0.026 | 3.69E-01           | 0.566  | 0.324           | 0.074 | 0.035 | 0.037  | 0.030       | 0.028 | 0.018 |
| Bengali        | 8.87E-01            | 0.268   | 0.197             | 0.419 | 0.116           | 0.027   | 0.022             | 0.028 | 0.019               | 6.25E-01           | 0.310   | 0.150 | 0.421           | 0.119 | 0.024   | 0.018 | 0.029               | 0.019 | 5.00E-01           | 0.224  | 0.246           | 0.415 | 0.115 | 0.032  | 0.025       | 0.027 | 0.017 |
| Brahmin_Tiwari | 8.68E-01            | 0.313   | 0.359             | 0.307 | 0.021           | 0.027   | 0.022             | 0.026 | 0.018               | 3.04E-01           | 0.386   | 0.276 | 0.316           | 0.023 | 0.024   | 0.019 | 0.027               | 0.019 | 1.12E-01           | 0.227  | 0.441           | 0.308 | 0.024 | 0.029  | 0.022       | 0.022 | 0.013 |
| Brahui         | 4.23E-01            | 0.632   | 0.248             | 0.081 | 0.039           | 0.038   | 0.033             | 0.035 | 0.025               | 6.13E-01           | 0.678   | 0.193 | 0.089           | 0.040 | 0.034   | 0.026 | 0.038               | 0.027 | 5.32E-01           | 0.597  | 0.302           | 0.064 | 0.037 | 0.040  | 0.033       | 0.030 | 0.019 |
| Burusho        | 6.50E-01            | 0.355   | 0.345             | 0.166 | 0.134           | 0.027   | 0.023             | 0.025 | 0.018               | 1.89E-01           | 0.424   | 0.264 | 0.175           | 0.138 | 0.025   | 0.019 | 0.027               | 0.019 | 1.70E-02           | 0.273  | 0.425           | 0.163 | 0.138 | 0.028  | 0.022       | 0.020 | 0.013 |
| GujaratiA      | 7.96E-01            | 0.361   | 0.372             | 0.232 | 0.034           | 0.032   | 0.026             | 0.033 | 0.022               | 3.91E-01           | 0.434   | 0.287 | 0.241           | 0.039 | 0.030   | 0.022 | 0.035               | 0.023 | 2.99E-01           | 0.263  | 0.461           | 0.240 | 0.036 | 0.034  | 0.027       | 0.027 | 0.017 |
| GujaratiB      | 8.92E-01            | 0.345   | 0.308             | 0.320 | 0.027           | 0.030   | 0.025             | 0.031 | 0.021               | 7.80E-01           | 0.405   | 0.239 | 0.327           | 0.029 | 0.027   | 0.021 | 0.032               | 0.022 | 6.12E-01           | 0.273  | 0.380           | 0.318 | 0.030 | 0.035  | 0.028       | 0.027 | 0.018 |
| GujaratiC      | 6.66E-01            | 0.296   | 0.301             | 0.395 | 0.009           | 0.031   | 0.026             | 0.031 | 0.021               | 2.45E-01           | 0.356   | 0.230 | 0.403           | 0.012 | 0.027   | 0.021 | 0.032               | 0.022 | 1.38E-01           | 0.226  | 0.368           | 0.393 | 0.014 | 0.036  | 0.028       | 0.030 | 0.018 |
| GujaratiD      | 4.77E-01            | 0.325   | 0.231             | 0.416 | 0.028           | 0.033   | 0.027             | 0.032 | 0.022               | 2.92E-01           | 0.373   | 0.176 | 0.422           | 0.029 | 0.029   | 0.022 | 0.034               | 0.023 | 1.52E-01           | 0.286  | 0.275           | 0.408 | 0.031 | 0.039  | 0.031       | 0.032 | 0.020 |
| Jew_Cochin     | 7.41E-01            | 0.554   | 0.181             | 0.213 | 0.052           | 0.041   | 0.034             | 0.038 | 0.026               | 8.31E-01           | 0.587   | 0.141 | 0.220           | 0.052 | 0.036   | 0.027 | 0.039               | 0.027 | 6.82E-02           | 0.525  | 0.231           | 0.194 | 0.050 | 0.043  | 0.034       | 0.034 | 0.021 |
| Kalash         | 4.76E-01            | 0.383   | 0.412             | 0.169 | 0.036           | 0.032   | 0.026             | 0.031 | 0.022               | 1.50E-01           | 0.468   | 0.317 | 0.173           | 0.042 | 0.030   | 0.022 | 0.035               | 0.024 | 6.65E-02           | 0.290  | 0.502           | 0.163 | 0.046 | 0.034  | 0.027       | 0.026 | 0.017 |
| Kharia         | 8.39E-01            | 0.130   | 0.056             | 0.638 | 0.175           | 0.027   | 0.022             | 0.029 | 0.019               | 7.73E-01           | 0.142   | 0.043 | 0.639           | 0.176 | 0.024   | 0.017 | 0.029               | 0.019 | 8.51E-01           | 0.128  | 0.065           | 0.632 | 0.174 | 0.036  | 0.027       | 0.031 | 0.019 |
| Kusunda        | 3.90E-01            | 0.082   | 0.076             | 0.239 | 0.602           | 0.023   | 0.018             | 0.023 | 0.016               | 3.45E-01           | 0.095   | 0.060 | 0.242           | 0.603 | 0.021   | 0.014 | 0.024               | 0.016 | 4.05E-01           | 0.070  | 0.089           | 0.234 | 0.607 | 0.030  | 0.023       | 0.025 | 0.016 |
| Lodhi          | 2.94E-01            | 0.265   | 0.234             | 0.472 | 0.029           | 0.027   | 0.023             | 0.027 | 0.018               | 3.19E-01           | 0.310   | 0.183 | 0.476           | 0.031 | 0.024   | 0.018 | 0.027               | 0.018 | 1.07E-01           | 0.210  | 0.293           | 0.465 | 0.032 | 0.033  | 0.025       | 0.027 | 0.017 |
| Makrani        | 1.02E-01            | 0.768   | 0.166             | 0.028 | 0.038           | 0.045   | 0.038             | 0.043 | 0.03                | 1.13E-01           | 0.800   | 0.128 | 0.032           | 0.039 | 0.040   | 0.031 | 0.044               | 0.031 | 4.00E-01           | 0.774  | 0.192           | 0.001 | 0.033 | 0.048  | 0.039       | 0.036 | 0.023 |
| Mala           | 3.90E-01            | 0.250   | 0.155             | 0.564 | 0.031           | 0.027   | 0.023             | 0.029 | 0.02                | 2.18E-01           | 0.281   | 0.119 | 0.567           | 0.033 | 0.024   | 0.018 | 0.029               | 0.020 | 2.14E-01           | 0.230  | 0.184           | 0.552 | 0.034 | 0.034  | 0.026       | 0.029 | 0.019 |
| Pathan         | 9.12E-01            | 0.441   | 0.363             | 0.140 | 0.057           | 0.030   | 0.026             | 0.028 | 0.02                | 4.85E-01           | 0.518   | 0.277 | 0.142           | 0.064 | 0.028   | 0.022 | 0.031               | 0.022 | 6.63E-02           | 0.360  | 0.446           | 0.136 | 0.059 | 0.028  | 0.023       | 0.021 | 0.013 |
| Punjabi        | 8.09E-01            | 0.303   | 0.261             | 0.410 | 0.026           | 0.028   | 0.023             | 0.029 | 0.02                | 3.75E-01           | 0.354   | 0.200 | 0.417           | 0.030 | 0.025   | 0.019 | 0.030               | 0.021 | 5.47E-01           | 0.236  | 0.326           | 0.415 | 0.023 | 0.032  | 0.026       | 0.026 | 0.017 |
| Sindhi         | 6.19E-01            | 0.432   | 0.311             | 0.227 | 0.029           | 0.029   | 0.025             | 0.028 | 0.02                | 6.74E-01           | 0.492   | 0.241 | 0.236           | 0.031 | 0.027   | 0.020 | 0.030               | 0.021 | 2.88E-01           | 0.376  | 0.377           | 0.211 | 0.035 | 0.030  | 0.024       | 0.024 | 0.015 |
| Vishwabrahmin  | 1.96E-01            | 0.270   | 0.172             | 0.528 | 0.030           | 0.028   | 0.023             | 0.027 | 0.018               | 9.14E-02           | 0.306   | 0.131 | 0.530           | 0.033 | 0.025   | 0.019 | 0.027               | 0.019 | 9.25E-02           | 0.246  | 0.204           | 0.516 | 0.034 | 0.035  | 0.027       | 0.028 | 0.017 |

## References

1. Moorjani, P. *et al.* Genetic evidence for recent population mixture in India. *Am. J. Hum. Genet.* **93**, 422-438, (2013).
2. Reich, D., Thangaraj, K., Patterson, N., Price, A. L. & Singh, L. Reconstructing Indian population history. *Nature* **461**, 489-494, (2009).
3. Metspalu, M. *et al.* Shared and Unique Components of Human Population Structure and Genome-Wide Signals of Positive Selection in South Asia. *The American Journal of Human Genetics* **89**, 731-744, (2011).
4. Jones, E. R. *et al.* Upper Palaeolithic genomes reveal deep roots of modern Eurasians. *Nat. Commun.* **6**, 8912, (2015).
5. Mathieson, I. *et al.* Genome-wide patterns of selection in 230 ancient Eurasians. *Nature* **528**, 499-503, (2015).
6. Hollard, C. *et al.* Strong genetic admixture in the Altai at the Middle Bronze Age revealed by uniparental and ancestry informative markers. *Forensic Science International: Genetics* **12**, 199-207, (2014).
7. Pamjav, H., Fehér, T., Németh, E. & Pádár, Z. Brief communication: New Y-chromosome binary markers improve phylogenetic resolution within haplogroup R1a1. *Am. J. Phys. Anthropol.* **149**, 611-615, (2012).
8. Underhill, P. A. *et al.* The phylogenetic and geographic structure of Y-chromosome haplogroup R1a. *Eur. J. Hum. Genet.* **23**, 124-131, (2014).
9. Anthony, D. W. *The Horse, the Wheel, and Language: How Bronze-Age Riders from the Eurasian Steppes Shaped the Modern World.* (Princeton University Press, 2007).
10. Fu, Q. *et al.* An early modern human from Romania with a recent Neanderthal ancestor. *Nature* **524**, 216-219, (2015).
11. Gamba, C. *et al.* Genome flux and stasis in a five millennium transect of European prehistory. *Nat. Commun.* **5**, 5257 (2014).
12. Haak, W. *et al.* Massive migration from the steppe was a source for Indo-European languages in Europe. *Nature* **522**, 207-211, (2015).
13. Lazaridis, I. *et al.* Ancient human genomes suggest three ancestral populations for present-day Europeans. *Nature* **513**, 409-413, (2014).
14. Olalde, I. *et al.* Derived immune and ancestral pigmentation alleles in a 7,000-year-old Mesolithic European. *Nature* **507**, 225-228, (2014).
15. Seguin-Orlando, A. *et al.* Genomic structure in Europeans dating back at least 36,200 years. *Science* **346**, 1113-1118, (2014).
16. Skoglund, P. *et al.* Genomic Diversity and Admixture Differs for Stone-Age Scandinavian Foragers and Farmers. *Science* **344**, 747-750, (2014).
17. Thangaraj, K. *et al.* Reconstructing the origin of Andaman Islanders. *Science* **308**, 996-996, (2005).
18. Basu, A., Sarkar-Roy, N. & Majumder, P. P. Genomic reconstruction of the history of extant populations of India reveals five distinct ancestral components and a complex structure. *Proceedings of the National Academy of Sciences*, (2016).
19. Kuz'mina, E. E. *The Origin of the Indo-Iranians* (Brill, 2007).



# Supplementary Information 10

## Modeling admixture from ghost populations

In this section we present a generalization of the framework of inferring admixture for a *Test* population from  $N$  *Reference* populations using a set of *Outgroup* ones<sup>1,2</sup> that we use in Supplementary Information, section 7. The basic idea is to relax the requirement that *Test* is descended from the  $N$  sources and allow it to be descended from an unobserved “ghost” population that resides on a line defined by two of the sources. The utility of this generalization will become clearer in its application, but intuitively this frees us to consider admixture with a population that may not correspond exactly to our available samples but is composed by the same elements as them in different proportions.

In the present we will mainly use it to show that we can recover mixture proportions from pseudo-“ghost” populations whose existence we actually know; this is a validation of the method, and also a test of the robustness of key population inferences as they can be shown to not be dependent on the available samples from the pseudo-“ghost” populations.

### Inference framework

To simplify notation, we will use the following shorthand for statistics involving a *Test* and *Reference* population:

$$\langle t, r_i \rangle = F_4(\text{Test}, \text{Ref}_i; O_2, O_3)$$

Note that  $\langle t, r_i \rangle$  is a  $\binom{m}{2}$  long column vector for all pairs of  $m$  different outgroups.

If *Test* is descended from  $N$  sources with proportions  $\alpha_i$  then:

$$\sum_{i=1}^N \alpha_i \langle t, r_i \rangle = 0_{\binom{m}{2} \times 1} \quad (\text{Eq. 1})$$

We remove the first two sources from this sum and replace them with a “ghost” population  $X$  that has the property (for a real  $\lambda$ ):

$$x = r_1 + \lambda(r_2 - r_1) \quad (\text{Eq. 2})$$

$X$  resides on the line formed by the two references. For  $\lambda=0$  it is identical to  $\text{Ref}_1$ . For  $\lambda=1$  it is identical to  $\text{Ref}_2$ . For  $0 < \lambda < 1$  it is a mixture of the two references, while for  $\lambda > 1$  it is more extreme than  $\text{Ref}_2$  and for  $\lambda < 0$  it is more extreme than  $\text{Ref}_1$ . When the parameter  $\lambda$  is outside the  $[0, 1]$  interval it controls the amount of extrapolation along the cline defined by the two source populations.

If these two source populations are composed of the same two population elements (in different proportions), then they define a cline in the  $\binom{m}{2}$ -dimensional space of  $f_4$ -statistics.

The population  $X$  we are seeking also resides along this cline. To see why this is the case, consider that  $r_1, r_2$  have respectively  $\gamma, 1-\gamma$  and  $\delta, 1-\delta$  proportions of ancestry from two unobserved non-admixed populations  $p$  and  $q$ . Then we may write:

$$\begin{aligned} r_1 &= \gamma p + (1 - \gamma)q \\ r_2 &= \delta p + (1 - \delta)q \end{aligned}$$

Thus, our expression for the ghost population (Eq. 2) can be re-written as:

$$x = \gamma p + (1 - \gamma)q + \lambda(\delta p + (1 - \delta)q) - \gamma p - (1 - \gamma)q$$

Or:

$$x = (\gamma + \lambda\delta - \lambda\gamma)p + (1 - \gamma - \lambda\delta + \gamma\lambda)q$$

Thus population  $x$  is also modeled as a 2-way mix of  $(\gamma + \lambda\delta - \lambda\gamma)$  of  $p$  and  $1 - (\gamma + \lambda\delta - \lambda\gamma)$  of  $q$ . The key point is that we do not need to sample either the unobserved populations  $p$  and  $q$  or the ghost population  $x$ . By having only  $r_1$  and  $r_2$ , we may model any population  $x$  on the cline defined by  $r_1$  and  $r_2$  (Fig. S9.1)

**Figure S9.1: Illustration of ghost admixture.** Test population  $t$  cannot be modelled as a mix of the observed source populations ( $r_1, r_2, r_3$ ) but can be modelled as a mix of  $r_3$  and unobserved ghost population  $x$ . The ghost population is composed of the same unobserved elements  $p$  and  $q$  as reference populations  $r_1$  and  $r_2$  and resides on the cline defined by them.

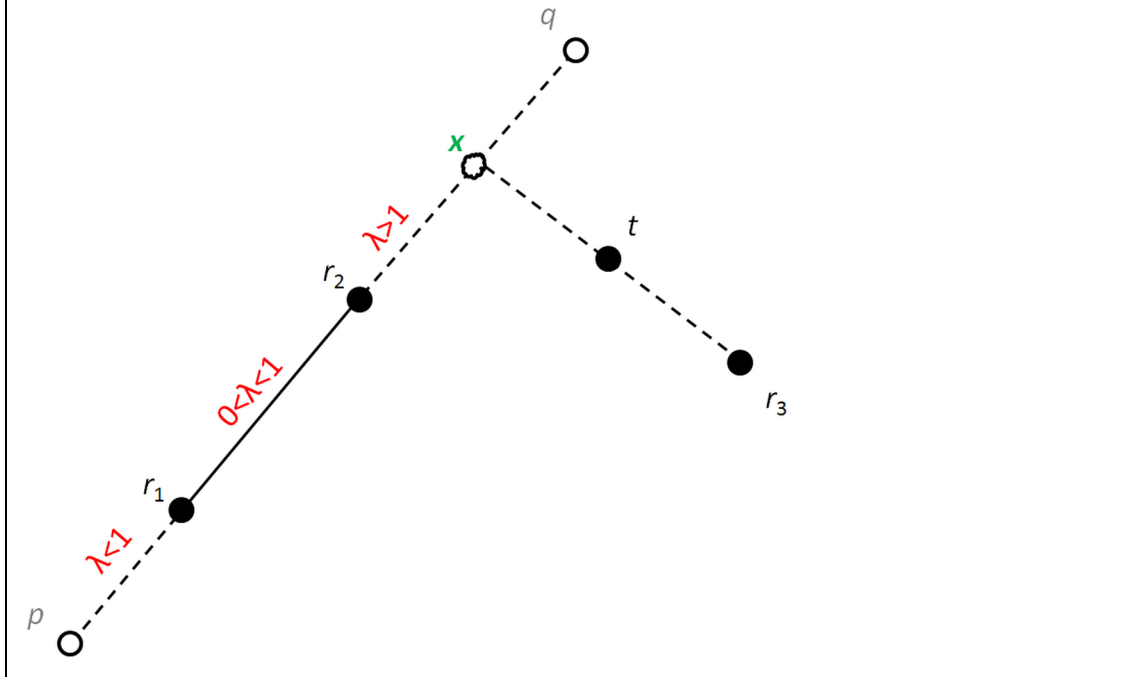

Assuming  $\beta$  fraction of ancestry from the ghost population, we may re-write Eq. 1 as:

$$\beta \langle t, x \rangle + \sum_{i=3}^N \alpha_i \langle t, r_i \rangle = 0_{\binom{m}{2} \times 1}$$

Or:

$$\beta(1 - \lambda) \langle t, r_1 \rangle + \beta \lambda \langle t, r_2 \rangle + \sum_{i=3}^N \alpha_i \langle t, r_i \rangle = 0_{\binom{m}{2} \times 1}$$

In practice (substituting theoretical  $F_4$  statistics with empirically estimated  $f_4$  statistics), the above equation holds approximately and we seek estimates of the coefficients  $\beta(1 - \lambda), \beta \lambda, \alpha_i$  that minimize the sum of squares:

$$\left\| \beta(1 - \lambda) \langle t, r_1 \rangle + \beta \lambda \langle t, r_2 \rangle + \sum_{i=3}^N \alpha_i \langle t, r_i \rangle \right\|_2^2$$

Subject to the constraints  $0 \leq \beta, \alpha_i \leq 1$  and  $\beta + \sum_{i=3}^N \alpha_i = 1$ .

Simplifying, we set  $k_1 = \beta(1 - \lambda), k_2 = \beta \lambda$ , and  $k_i = \alpha_i$  for  $i > 2$ . Then the optimization problem is written as:

$$\min \left\| \sum_{i=1}^N k_i \langle t, r_i \rangle \right\|_2^2, \text{ subject to } \sum_{i=1}^N k_i = 1 \text{ and } 0 \leq k_i \leq 1 \text{ for } i > 2.$$

We use the *lsqlin* function of Matlab (<http://www.mathworks.com/help/optim/ug/lsqlin.html>) to solve this problem. This function can solve the problem:

$$\min \frac{1}{2} \|C \cdot x - d\|_2^2 \text{ subject to } Aeq \cdot x = beq \text{ and } lb \leq x \leq ub$$

In our application:

- $x = \begin{bmatrix} k_1 \\ k_2 \\ \dots \\ k_N \end{bmatrix}$
- $C = [\langle t, r_1 \rangle \quad \langle t, r_2 \rangle \quad \dots \quad \langle t, r_N \rangle]$
- $d = 0_{\binom{m}{2} \times 1}$
- $Aeq = 1_{1 \times N}$
- $beq = 1$
- $lb = \begin{bmatrix} -\infty \\ -\infty \\ 0 \\ \dots \\ 0 \end{bmatrix}$
- $ub = \begin{bmatrix} \infty \\ \infty \\ 1 \\ \dots \\ 1 \end{bmatrix}$

We practically set  $\infty = 100$ . This allows  $\lambda$  to stretch between  $[-100, 100]$ , i.e., for the ghost population to be a 100-fold times outside the segment of a cline defined by the two reference populations.

### **Application**

As we mentioned in the beginning of this note, we validate the new method using cases with known admixture events; these are mainly taken from Supplementary Information, section 7. We will use the O9 as the set of outgroups.

### WHG

Scandinavian hunter-gatherers (SHG) can be modeled as a 2-way mix of EHG and WHG and the Middle Neolithic/Chalcolithic Europeans (Europe\_MNChL) can be modeled as a 2-way mix of Anatolian Neolithic and WHG. These 2-way mixtures can be expressed in the framework discussed in this section as follows.

| Test         | Ref <sub>1</sub> | Ref <sub>2</sub> | $\alpha_{\text{WHG}}$ |
|--------------|------------------|------------------|-----------------------|
| Europe_MNChL | Anatolia_N       | WHG              | 0.211                 |
| SHG          | EHG              | WHG              | 0.553                 |

We withhold WHG and re-estimate mixture proportions. We also estimate the mixture proportion of Europe\_MNChL by making use of the fact that WHG can be modeled as a mixture of Switzerland\_HG and EHG.

| Test         | Ref <sub>1</sub> | Ref <sub>2</sub> | Ref <sub>3</sub> | $\alpha_{\text{Ghost WHG}}$ | $\lambda$ |
|--------------|------------------|------------------|------------------|-----------------------------|-----------|
| Europe_MNChL | EHG              | SHG              | Anatolia_N       | 0.224                       | 1.64      |
| Europe_MNChL | EHG              | Switzerland_HG   | Anatolia_N       | 0.188                       | 0.81      |
| SHG          | Anatolia_N       | Europe_MNChL     | EHG              | 0.578                       | 3.86      |

Thus, mixture proportions from “Ghost WHG” are within ~3% of those from actual WHG. Note the amount of extrapolation gauged by the  $\lambda$  parameter: “Ghost WHG” is inferred to be beyond the EHG→SHG cline segment, in-between (EHG, Switzerland\_HG) and substantially beyond the Anatolia\_N→Europe\_MNChL cline segment.

### EHG

SHG can be modeled as a 2-way mix of EHG and WHG, Early/Middle Bronze steppe populations (Steppe\_EMBA) can be modeled as a 2-way mix of EHG and Iran\_ChL, and WHG can be modeled as a 2-way mix of Switzerland\_HG and EHG.

| Test        | Ref <sub>1</sub> | Ref <sub>2</sub> | $\alpha_{\text{EHG}}$ |
|-------------|------------------|------------------|-----------------------|
| SHG         | WHG              | EHG              | 0.447                 |
| Steppe_EMBA | Iran_ChL         | EHG              | 0.528                 |
| WHG         | Switzerland_HG   | EHG              | 0.083                 |

We withhold EHG and can estimate mixture proportions as follows.

| Test        | Ref <sub>1</sub> | Ref <sub>2</sub> | Ref <sub>3</sub> | $\alpha_{\text{Ghost EHG}}$ | $\lambda$ |
|-------------|------------------|------------------|------------------|-----------------------------|-----------|
| SHG         | Iran_ChL         | Steppe_EMBA      | WHG              | 0.510                       | 1.62      |
| Steppe_EMBA | WHG              | SHG              | Iran_ChL         | 0.612                       | 1.92      |
| Steppe_EMBA | Switzerland_HG   | WHG              | Iran_ChL         | 0.580                       | 5.94      |
| WHG         | Iran_ChL         | Steppe_EMBA      | Switzerland_HG   | 0.113                       | 1.32      |

Thus, mixture proportions from “Ghost EHG” are within ~8% of those from actual EHG. Note the successful modeling of Steppe\_EMBA when using the Switzerland\_HG→WHG cline to infer the “Ghost EHG”: since WHG has mostly Switzerland\_HG ancestry, this involves projection well beyond the (Switzerland\_HG, WHG) segment.

### Steppe\_EMBA

Europe\_LNBA and Steppe\_MLBA can both be modeled as 2-way mixtures of Europe\_MNChL and Steppe\_EMBA.

| Test        | Ref <sub>1</sub> | Ref <sub>3</sub> | $\alpha_{\text{Steppe\_EMBA}}$ |
|-------------|------------------|------------------|--------------------------------|
| Europe_LNBA | Europe_MNChL     | Steppe_EMBA      | 0.524                          |
| Steppe_MLBA | Europe_MNChL     | Steppe_EMBA      | 0.694                          |

But, Steppe\_EMBA can be modeled as a 2-way mixture of EHG and Iran\_ChL. We thus withhold Steppe\_EMBA and model Europe\_LNBA and Steppe\_MLBA as 3-way mixtures:

| Test        | Ref <sub>1</sub> | Ref <sub>2</sub> | Ref <sub>3</sub> | $\alpha_{\text{Ghost Steppe\_EMBA}}$ | $\lambda$ |
|-------------|------------------|------------------|------------------|--------------------------------------|-----------|
| Europe_LNBA | EHG              | Iran_ChL         | Europe_MNChL     | 0.575                                | 0.52      |
| Steppe_MLBA | EHG              | Iran_ChL         | Europe_MNChL     | 0.716                                | 0.49      |

These are within ~5% of those from the actual Steppe\_EMBA. Thus, we could infer admixture from a population that is an approximately even mix of EHG and Iran\_ChL into Late Neolithic/Bronze Age Europe and the Middle/Late Bronze Age Eurasian steppe even if we did not have any samples from the actual Early/Middle Bronze Age Yamnaya-related pastoralists that were the actual mediators of this admixture.

### Iran\_ChL

Steppe\_EMBA can be modeled as a 2-way mix of EHG and Iran\_ChL and Levant\_BA can be modeled as a 2-way mix of Iran\_ChL and Levant\_N. The very strong differentiation between the two substratum populations (Levant\_N and EHG) makes this an ideal case for applying our method. First, we model the admixed populations using Iran\_ChL.

| Test        | Ref <sub>1</sub> | Ref <sub>2</sub> | $\alpha_{\text{Iran\_ChL}}$ |
|-------------|------------------|------------------|-----------------------------|
| Steppe_EMBA | EHG              | Iran_ChL         | 0.472                       |
| Levant_BA   | Levant_N         | Iran_ChL         | 0.399                       |

Next, we withhold Iran\_ChL and model them as follows, using the EHG→Steppe\_EMBA and Levant\_N→Levant\_BA clines:

| Test        | Ref <sub>1</sub> | Ref <sub>2</sub> | Ref <sub>3</sub> | $\alpha_{\text{Ghost Iran\_ChL}}$ | $\lambda$ |
|-------------|------------------|------------------|------------------|-----------------------------------|-----------|
| Steppe_EMBA | Levant_N         | Levant_BA        | EHG              | 0.485                             | 2.90      |
| Levant_BA   | EHG              | Steppe_EMBA      | Levant_N         | 0.252                             | 1.86      |

The inference of Steppe\_EMBA is robust (within ~2%), for Levant\_BA less so (~15% off). When we model Levant\_BA using qpAdm and the same O9 outgroups, we obtain an estimate of  $0.43 \pm 0.102$  of Iran\_ChL ancestry, therefore our estimate above is off by 1.7 standard errors.

### Levant\_N

In Supplementary Information, section 8 we show that East African populations can be modeled as a mixture of Mota and Levant\_N. Levant\_BA can also be modeled as Iran\_ChL and Levant\_N. We estimate, using O8ENSW as outgroups:

| Test      | Ref <sub>1</sub> | Ref <sub>2</sub> | $\alpha_{\text{Levant\_N}}$ |
|-----------|------------------|------------------|-----------------------------|
| Levant_BA | Levant_N         | Iran_ChL         | 0.527                       |
| Somali    | Levant_N         | Mota             | 0.330                       |
| Kikuyu    | Levant_N         | Mota             | 0.134                       |
| Masai     | Levant_N         | Mota             | 0.181                       |
| Datog     | Levant_N         | Mota             | 0.228                       |
| Sandawe   | Levant_N         | Mota             | 0.156                       |

Withholding Levant\_N we obtain:

| Test      | Ref <sub>1</sub> | Ref <sub>2</sub> | Ref <sub>3</sub> | $\alpha_{\text{Ghost Levant\_N}}$ | $\lambda$ |
|-----------|------------------|------------------|------------------|-----------------------------------|-----------|
| Levant_BA | Mota             | Somali           | Iran_ChL         | 0.605                             | 2.75      |
| Levant_BA | Mota             | Kikuyu           | Iran_ChL         | 0.320                             | 7.79      |
| Levant_BA | Mota             | Masai            | Iran_ChL         | 0.463                             | 5.24      |
| Levant_BA | Mota             | Datog            | Iran_ChL         | 0.537                             | 3.95      |
| Levant_BA | Mota             | Sandawe          | Iran_ChL         | 0.426                             | 6.46      |
| Somali    | Iran_ChL         | Levant_BA        | Mota             | 0.365                             | 1.53      |
| Kikuyu    | Iran_ChL         | Levant_BA        | Mota             | 0.156                             | 1.34      |
| Masai     | Iran_ChL         | Levant_BA        | Mota             | 0.200                             | 1.52      |
| Datog     | Iran_ChL         | Levant_BA        | Mota             | 0.264                             | 1.36      |
| Sandawe   | Iran_ChL         | Levant_BA        | Mota             | 0.159                             | 1.81      |

We observe that mixture proportions with “Ghost Levant\_N” for East African populations match quite closely (within ~4%) those with actual Levant\_N, but mixture proportions with “Ghost Levant\_N” for Levant\_BA vary widely. The parameter  $\lambda$  which gauges the amount of extrapolation beyond the observed cline segment is useful to understand this discrepancy: when the “Test” population is East African, extrapolation along the Iran\_ChL→Levant\_BA involves only 34-81% projection beyond Levant\_BA, but when the “Test” population is Levant\_BA, extrapolation along the Mota→*East African* cline involves extrapolation of 175-679% beyond *East African*. For example, using Kikuyu as *East African* we are attempting to recreate the admixing population by using only Mota and a population that has its ancestry from ~6/7 Mota and only ~1/7 from West Eurasia. Assuming perfect estimation of  $f$ -statistics and perfect identification of ancestral sources any cline

segment would suffice to reproduce mixture proportions using our method, as any line segment of a line uniquely defines its direction. As these assumptions will not hold in practice, our results suggest that a high degree of extrapolation may lead to inaccurate estimates of mixture proportions.

### Anatolia\_N

In Supplementary Information, section 7 we inferred that Anatolia\_N cannot be modeled as a mixture of Levant\_N, Iran\_N, WHG, EHG. Rank=3 is not rejected ( $P=0.463$ ) for the Left quintuple (Anatolia\_N, Levant\_N, Iran\_N, WHG, EHG) in relation to the O9 outgroups, but a negative proportion ( $-0.069 \pm 0.027$ ) of EHG is inferred. This suggests that these five populations are descended from four streams of ancestry but Neolithic Anatolia cannot be reduced to a weighted combination of the other four populations.

We can re-formulate this problem within the framework introduced in this section by modeling Anatolia\_N as a mix of Levant\_N, Iran\_N and a population on the EHG→WHG cline or EHG→Switzerland\_HG or WHG→Switzerland\_HG cline (as WHG itself is modeled as a mixture of EHG and WHG):

| <b>Test</b> | <b>Ref<sub>1</sub></b> | <b>Ref<sub>2</sub></b> | <b>Ref<sub>3</sub></b> | <b>Ref<sub>4</sub></b> | <b><math>\alpha_{\text{Ghost}}</math></b> | <b><math>\lambda</math></b> |
|-------------|------------------------|------------------------|------------------------|------------------------|-------------------------------------------|-----------------------------|
| Anatolia_N  | EHG                    | WHG                    | Levant_N               | Iran_N                 | 0.3293                                    | 1.1364                      |
| Anatolia_N  | EHG                    | Switzerland_HG         | Levant_N               | Iran_N                 | 0.3339                                    | 1.0793                      |
| Anatolia_N  | WHG                    | Switzerland_HG         | Levant_N               | Iran_N                 | 0.3213                                    | 0.9297                      |

Notice that the proportions from the “Ghost” population are fairly stable at around  $\sim 1/3$ , and this population is inferred to be (based on the  $\lambda$  parameter) beyond both WHG and Switzerland\_HG on the respective EHG→WHG and EHG→Switzerland\_HG clines and closer to Switzerland\_HG than to WHG. Future sampling may reveal whether such a population, whose existence is hypothesized here as a way to better model the Anatolian Neolithic, did actually exist.

### **Visualization of cline intersection**

We used the idea of intersecting clines (Fig. S9.1) to illustrate how our method works, but since it relies on statistics in  $\binom{m}{2}$ -dimensional space, it is not possible to visualize it directly. We introduce a method for visualizing cline intersection in the special case of  $N=3$ , i.e., when the admixed population is formed of a fixed reference population  $Ref_3$  and a ghost population residing on the  $Ref_1, Ref_2$  cline. Most of the applications of our method above involve  $N=3$ , although our formulation allows for arbitrary  $N$ .



**Figure S9.2: Visualization of cline intersection.** A *Test* population is projected on the  $(x, y)$  plane and is modeled as a mix of  $Ref_3$  and a population on the  $Ref_1, Ref_2$  cline.

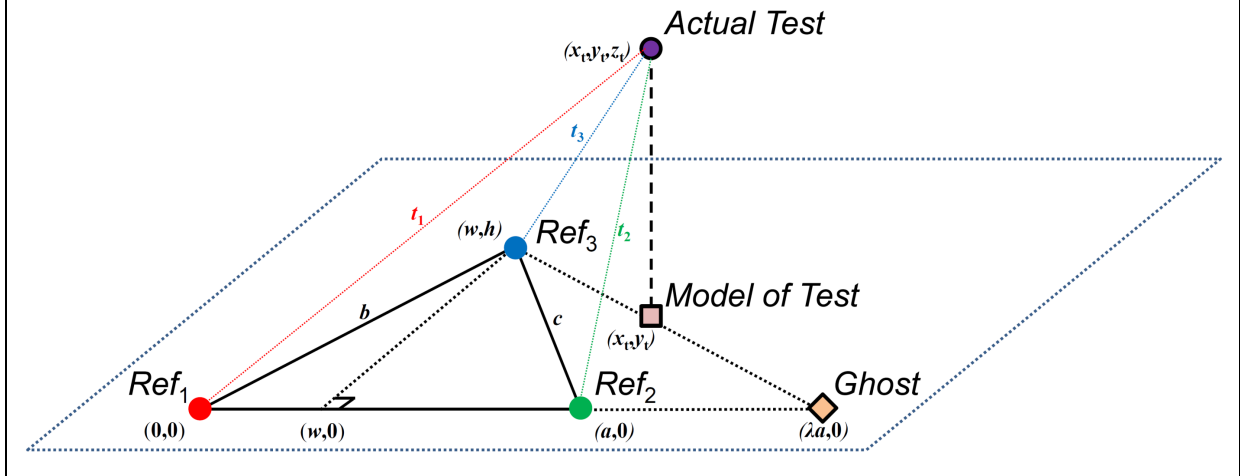

The basic idea of the visualization technique is to embed populations in a 3D space in a way that preserves their Euclidean distances in the  $\binom{m}{2}$ -dimensional space of  $f_4$ -statistics (Fig. S9.2). Given a vector  $\langle a, b \rangle = F_4(A, B; O_2, O_3)$  we define as the distance between populations  $A, B$  the 2-norm:

$$d_{A,B} = \|\langle a, b \rangle\|_2$$

There are three such distances between the three reference populations that can be thought of as three sides of a triangle  $a = d_{Ref_1, Ref_2}$ ,  $b = d_{Ref_1, Ref_3}$ ,  $c = d_{Ref_2, Ref_3}$ . We place this triangle on a 2D Cartesian plane  $(x, y)$  (Fig. S9.2) with vertex coordinates:

- $Ref_1$ :  $(0,0)$
- $Ref_2$ :  $(0,a)$
- $Ref_3$ :  $(w = \frac{a^2+b^2-c^2}{2a}, h = \sqrt{b^2 - w^2})$

Next, consider the *Test* population which has distances to the three reference populations:  $t_1 = d_{Test, Ref_1}$ ,  $t_2 = d_{Test, Ref_2}$ ,  $t_3 = d_{Test, Ref_3}$ . This can be placed in 3D space  $(x, y, z)$  at an intersection point  $(x_t, y_t, z_t)$  of three spheres centered on  $Ref_1, Ref_2, Ref_3$  with radii  $t_1, t_2, t_3$ . An intersection of a pair of spheres is not always defined. We can find it by noting that:

$$\begin{aligned} t_1^2 &= x_t^2 + y_t^2 + z_t^2 \\ t_2^2 &= (x_t - a)^2 + y_t^2 + z_t^2 \\ t_3^2 &= (x_t - w)^2 + (y_t - h)^2 + z_t^2 \end{aligned}$$

These equations yield:

$$x_t = \frac{a^2 + t_1^2 - t_2^2}{2a}$$

$$y_t = \frac{t_2^2 - t_3^2 - (x_t - a)^2 + (x_t - w)^2 + h^2}{2h}$$

$$z_t = \pm \sqrt{t_1^2 - x_t^2 - y_t^2}$$

The root is defined if  $t_1^2 \geq x_t^2 + y_t^2$ , that is if the projection of the *Test* population on the  $(x, y)$  plane  $(x_t, y_t)$  is enclosed in a sphere of radius  $t_1 = d_{Test, Ref_1}$ . We can plot either the positive or negative root that are symmetrically positioned about the  $(x, y)$  plane at distance  $\sqrt{t_1^2 - x_t^2 - y_t^2}$ .

Since the ghost population is allowed to be on the cline defined by  $Ref_1=(0,0)$  and  $Ref_2=(0,a)$ , and the ghost population is placed on  $(\lambda a, 0)$ , where  $\lambda$  is a real-valued parameter. It is also placed on a line which passes through points  $(x_t, y_t)$  and  $(w, h)$ . We obtain:

$$\lambda = \frac{hx_t - wy_t}{a(h - y_t)}$$

The method we just described is useful for exploratory data analysis as it allows one to gain insight by visualizing relationships between populations. We show examples of its application on several ghost populations discussed in this section and in Supplementary Information, sections 8 and 11, in Extended Data Fig. 6.

## Conclusion

In this section we used the framework of inferring admixture from ghost populations to (i) show its feasibility, and (ii) demonstrate the coherence of the inferences presented in this paper: by removing populations and re-estimating mixture proportions from pseudo-ghost populations we could, nonetheless, estimate mixture proportions fairly accurately. A useful area of future work is to use this framework in an exploratory manner to uncover previously undetected ghost populations in the manner we attempted to do for the Anatolian Neolithic and to provide a way of gauging confidence in the existence of such populations.

## References

1. Haak, W. *et al.* Massive migration from the steppe was a source for Indo-European languages in Europe. *Nature* **522**, 207-211, (2015).
2. Lazaridis, I. *et al.* Ancient human genomes suggest three ancestral populations for present-day Europeans. *Nature* **513**, 409-413, (2014).

# Supplementary Information 11

## Admixture in East Asians and Eastern European hunter-gatherers

In Supplementary Information, section 8 we discussed the admixture between West Eurasian populations (likely from the Levant) and East Africans. In this section we show that there is previously unknown admixture from a population related to “Ancient North Eurasians”<sup>1,2</sup> and “Eastern European hunter-gatherers”<sup>3</sup> into East Asians.

### Western Eurasians are not clade with respect to Eastern non-Africans and vice versa

If separate migrations settled Western Eurasia and Eastern Eurasia during the Upper Paleolithic, with subsequent genetic isolation, then statistics of the form  $f_4(\text{West Eurasian}_1, \text{West Eurasian}_2; \text{Eastern non-African}_1, \text{Eastern non-African}_2)$  have an expected value of 0. Table S11.1 shows that there are statistics that strongly deviate from 0, disproving the genetic isolation hypothesis of West Eurasians and eastern non-Africans. In particular, the Han share more alleles with the EHG than with other West Eurasians, with WHG than with Kostenki14, Switzerland\_HG, Natufians, and with CHG than with Kostenki14, and Natufians.

**Table S11.1: Asymmetry between West Eurasians and (Han, Papuan or Onge).** The EHG share significantly more alleles than other West Eurasians with the Han. Significant statistics are shown for West Eurasians in the set: Switzerland\_HG<sup>4</sup>, WHG, EHG, Iran\_N, Natufian, CHG<sup>4</sup>, Kostenki14<sup>5</sup>, MA1<sup>2</sup> and Eastern non-Africans in the set: Han, Papuan, Onge.

| <b>A</b> | <b>B</b>       | <b>C</b> | <b>D</b> | <b><math>f_4(A, B; C, D)</math></b> | <b>Z</b> |
|----------|----------------|----------|----------|-------------------------------------|----------|
| EHG      | Kostenki14     | Han      | Papuan   | 0.00233                             | 5.7      |
| EHG      | Natufian       | Han      | Papuan   | 0.00222                             | 5.4      |
| EHG      | Iran_N         | Han      | Papuan   | 0.00168                             | 4.6      |
| EHG      | Kostenki14     | Han      | Onge     | 0.00140                             | 3.9      |
| EHG      | Natufian       | Han      | Onge     | 0.00133                             | 3.7      |
| EHG      | WHG            | Han      | Papuan   | 0.00106                             | 3.6      |
| EHG      | WHG            | Han      | Onge     | 0.00099                             | 3.6      |
| WHG      | Kostenki14     | Han      | Papuan   | 0.00133                             | 3.6      |
| CHG      | Kostenki14     | Han      | Papuan   | 0.00145                             | 3.5      |
| EHG      | MA1            | Han      | Onge     | 0.00121                             | 3.5      |
| CHG      | Natufian       | Han      | Papuan   | 0.00131                             | 3.4      |
| EHG      | Switzerland_HG | Han      | Papuan   | 0.00126                             | 3.4      |
| WHG      | Natufian       | Han      | Papuan   | 0.00123                             | 3.3      |
| EHG      | CHG            | Han      | Onge     | 0.00093                             | 3.1      |

### Eastern Eurasians have admixture from a population related to the EHG

In Supplementary Information, section 7 we showed that the WHG could be modeled as a mixture of EHG and Switzerland\_HG. Discovering this admixture was possible by the availability of the Bichon (Switzerland\_HG) individual. It is possible that EHG too is admixed, with Switzerland\_HG as one source and a ghost population “X” as another. If this population “X” also contributed to the Han, then this would explain why the Han share more genetic drift with the EHG than with other West Eurasians. The Han would also share more genetic drift with populations with EHG admixture (such as WHG and CHG) than with other West Eurasians.

At this stage we are agnostic as to the identity of “X”. A special case is that X=EHG, i.e., EHG is unadmixed, gene flow was exclusively from EHG→Han; a different special case is that X=Han, i.e., Han is unadmixed, gene flow was exclusively from Han→EHG. In the general case X is an unobserved population that contributed to both EHG and to Han.

As our problem involves both East and West Eurasian populations, we must withdraw populations from the set of outgroups (e.g., we want to treat Han as a potentially admixed population, so it cannot be in the set of outgroups). We use the following set that includes an African group, Upper Paleolithic Eurasians and an eastern non-African population (Papuan) that is unlikely to have been affected by recent gene flow with West Eurasians.

**M5:** Mbuti, Ust\_Ishim, Papuan, Kostenki14, Switzerland\_HG

We first test whether the triple Left=(EHG, WHG, Han) may be related to Right=M5 only via 2 streams of ancestry. We strongly reject rank=1 ( $P=6.11e-27$ ), and thus EHG cannot be modeled as a mix of WHG and Han; this rejects the simple case where X=Han. We then test Left=(Han, Onge, EHG) which is not rejected ( $P=0.59$ ). Thus, the simple case where X=EHG cannot be rejected. We estimate that Han can be modeled as having  $92.1 \pm 1.9\%$  Onge and  $7.9 \pm 1.9\%$  EHG ancestry.

It is useful to assess this visually, following the method of ref.<sup>3</sup> (Fig. S11.1) which makes use of the fact that when a *Test* population is a mix of populations related to  $Ref_1$  and  $Ref_2$  in proportions  $\alpha$  and  $1-\alpha$ , then over pairs of outgroups ( $O_2, O_3$ ), the following equation holds:

$$f_4(\text{Test}, \text{Ref}_2; O_2, O_3) \approx \frac{\alpha}{\alpha-1} f_4(\text{Test}, \text{Ref}_1; O_2, O_3)$$

This is an equation of a line with a negative slope ( $\frac{\alpha}{1-\alpha}$ ) through the origin. Fig. S11.1 shows such a line when modeling Han as a mix of EHG and Onge but not when modeling EHG as a mix of Han and WHG. Several other East Asian populations can be modeled as an EHG+Onge mix. We show these in Table S11.2 and plot mixture proportions in Extended Data Fig. 4.

Two notes of caution are necessary here. First, the admixing populations need not be necessarily “close” (either geographically or genetically) to the EHG and Onge, but they are in some sense related to them so that present-day Eastern Eurasian populations have intermediate allele frequencies between them. This is plausible given that both EHG and Onge show genetic affinities that stretch well beyond eastern Europe and the Andaman Islands, and may represent in some sense more widely dispersed populations. The EHG share more alleles with a ~24,000-year old Upper Paleolithic individual (MA1) from Siberia<sup>6</sup> than any other ancient or present-day population, and the Onge are representative of both “Ancestral South Indians” contributing to populations of the Indian subcontinent<sup>7,8</sup> but also of a minor stream of ancestry present in Amazonians<sup>9</sup>. Second, in contrast to western Eurasia there is currently no genome-wide ancient DNA data from eastern Eurasia. As an analogy, prior to the availability of genomes other than the Tyrolean Iceman, Europeans were modeled as a 2-way mix of “Sardinians/Iceman” and an “Ancient North Eurasian” ancestry from which the Native Americans were also descended. However, subsequent work with ancient DNA provided a much more detailed picture, involving a three-way mixture and more proximate source populations<sup>1-3,10</sup>. Thus, while our results demonstrate widespread ancient admixture in eastern Eurasia, the story of eastern Eurasian origins will doubtlessly be more complex than our model.

Table S11.2 assigns minimal EHG ancestry to the She people (6.1±2.0%). An alternative formulation is to use the She as an ancestral source. This allows us to place the Onge in the set of outgroups (M6 = M5 + Onge) and estimate whether eastern Eurasian populations can be modeled as a mix of She+EHG. Table S11.3 shows mixture proportions from this model. Many mainland East Asian populations have EHG proportions close to zero in this analysis (i.e., not significantly higher than the She), while others have substantially more such ancestry. The inferred mixture proportions of EHG ancestry in this analysis are consistent with those obtained using Onge as a reference.

### **Replacing EHG with a “Ghost” population**

We modeled Eastern Eurasian populations as EHG+Onge/She mixtures, but it is possible that EHG may not correspond exactly to the admixing population. Recall that WHG can be modeled as a mix of Switzerland\_HG and EHG, and SHG (Scandinavian hunter-gatherers) as a mix of WHG and EHG (Supplementary Information, section 7). As we are using Switzerland\_HG as an outgroup, we can define three “clines” of ancestry for the remaining three populations (WHG→EHG, WHG→SHG, or SHG→EHG) and treat the population admixing into East Eurasians as a “ghost” population residing on these clines as in Supplementary Information, section 8. This analysis (Table S11.4) suggests that the admixing population may be beyond EHG on the WHG→EHG and SHG→EHG clines. Conversely, we can model EHG as a mix of WHG and a “Ghost” population on the Onge→*Eastern Eurasian* cline (Table S11.5). This suggests that EHG can be modeled as a mix of ~1/4 WHG and ~3/4 from the Ghost population.

**Figure S11.1: Modeling Han as a mix of EHG and Onge (a) or EHG as a mix of Han and WHG.**

Consistent with the formal analysis, (a) is consistent with two streams of ancestry, with Han being “intermediate” between EHG and Onge, while (b) is inconsistent with two streams of ancestry, with EHG not clearly “intermediate” between WHG and Han.

(a)

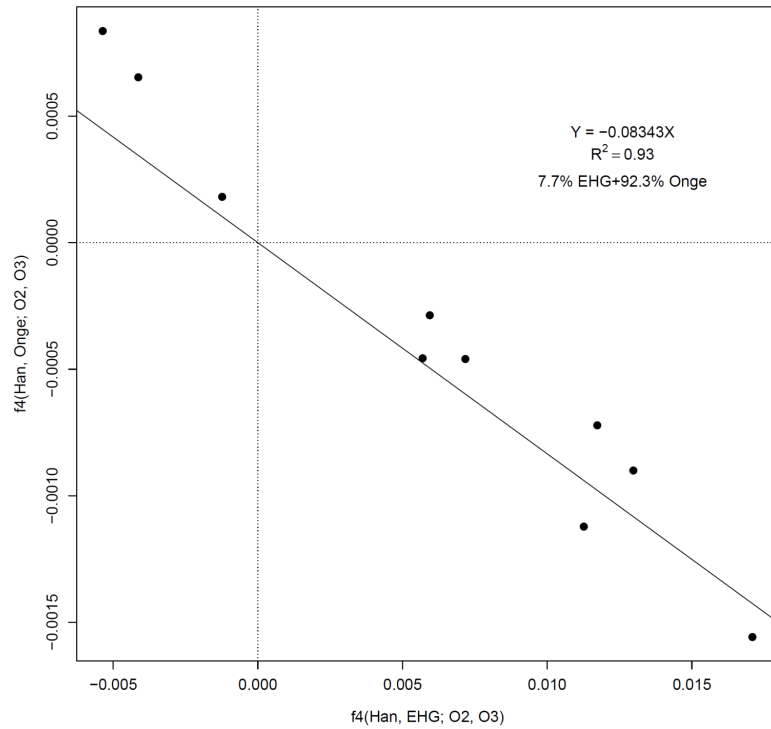

(b)

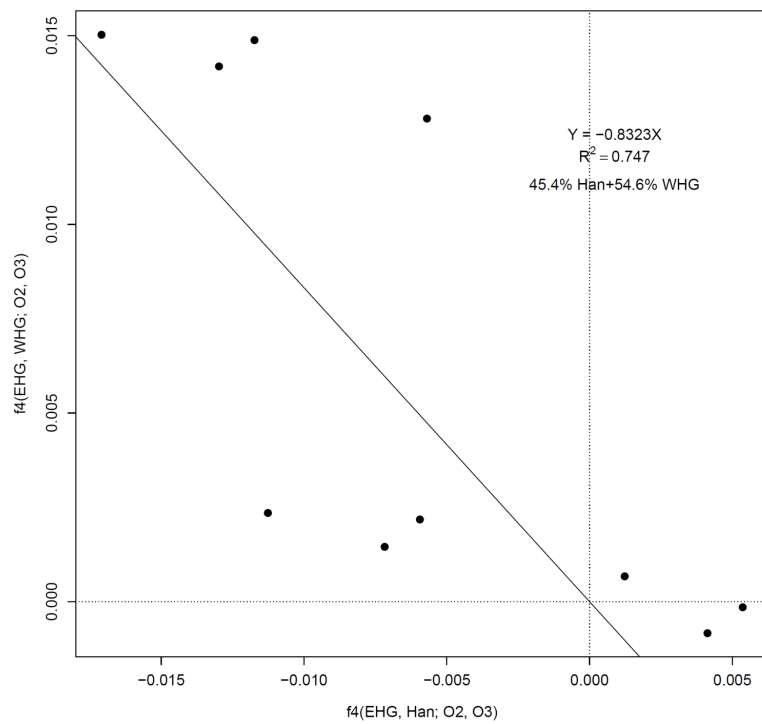

**Table S11.2: Modeling Eastern Eurasian populations as a mix of EHG and Onge.** We test whether (*Test*, EHG, Onge) is consistent with 2 streams of ancestry in relation to the M5 outgroups and list mixture proportions. P-values >0.05 are highlighted. The label “Eastern Eurasian” was applied to those populations that possess >50% of the “Eastern Eurasian” K=6 ADMIXTURE component; these do not necessarily reside in Eastern Eurasia

| <b>Test</b> | <b>P-value for rank=1</b> | <b>Mixture Proportions</b> |            |                   |
|-------------|---------------------------|----------------------------|------------|-------------------|
|             |                           | <b>Onge</b>                | <b>EHG</b> | <b>Std. Error</b> |
| Selkup      | 1.32E-01                  | 0.555                      | 0.445      | 0.016             |
| Tubalar     | 8.25E-06                  | 0.579                      | 0.421      | 0.017             |
| Even        | 6.00E-02                  | 0.606                      | 0.394      | 0.016             |
| Kyrgyz      | 1.86E-04                  | 0.656                      | 0.344      | 0.017             |
| Altaiian    | 7.65E-04                  | 0.673                      | 0.327      | 0.018             |
| Yukagir     | 3.70E-01                  | 0.700                      | 0.300      | 0.016             |
| Dolgan      | 1.86E-02                  | 0.747                      | 0.253      | 0.020             |
| Kalmyk      | 3.64E-03                  | 0.749                      | 0.251      | 0.018             |
| Tuvinian    | 9.03E-02                  | 0.760                      | 0.240      | 0.017             |
| Chukchi     | 1.65E-01                  | 0.767                      | 0.233      | 0.018             |
| Eskimo      | 1.71E-01                  | 0.769                      | 0.231      | 0.019             |
| Yakut       | 2.23E-01                  | 0.778                      | 0.222      | 0.017             |
| Itelmen     | 1.27E-01                  | 0.787                      | 0.213      | 0.020             |
| Koryak      | 1.48E-01                  | 0.793                      | 0.207      | 0.019             |
| Nganasan    | 8.93E-02                  | 0.801                      | 0.199      | 0.019             |
| Kusunda     | 7.59E-03                  | 0.834                      | 0.166      | 0.018             |
| Oroqen      | 6.88E-01                  | 0.860                      | 0.140      | 0.018             |
| Tu          | 1.58E-01                  | 0.864                      | 0.136      | 0.019             |
| Daur        | 4.98E-01                  | 0.874                      | 0.126      | 0.019             |
| Mongola     | 1.29E-01                  | 0.875                      | 0.125      | 0.020             |
| Xibo        | 1.75E-01                  | 0.877                      | 0.123      | 0.019             |
| Ulchi       | 4.87E-01                  | 0.887                      | 0.113      | 0.019             |
| Hezhen      | 4.18E-01                  | 0.896                      | 0.104      | 0.019             |
| Thai        | 1.58E-01                  | 0.902                      | 0.098      | 0.018             |
| Cambodian   | 1.74E-01                  | 0.915                      | 0.085      | 0.018             |
| Korean      | 2.18E-01                  | 0.917                      | 0.083      | 0.020             |
| Miao        | 7.76E-01                  | 0.921                      | 0.079      | 0.020             |
| Han         | 5.88E-01                  | 0.921                      | 0.079      | 0.019             |
| Tujia       | 6.55E-01                  | 0.923                      | 0.077      | 0.020             |
| Naxi        | 6.84E-01                  | 0.923                      | 0.077      | 0.019             |
| Japanese    | 6.15E-01                  | 0.927                      | 0.073      | 0.019             |
| Yi          | 6.44E-01                  | 0.927                      | 0.073      | 0.020             |
| Lahu        | 5.73E-01                  | 0.929                      | 0.071      | 0.019             |
| Kinh        | 7.55E-01                  | 0.931                      | 0.069      | 0.019             |
| Dai         | 7.39E-01                  | 0.932                      | 0.068      | 0.019             |
| Atayal      | 8.64E-01                  | 0.934                      | 0.066      | 0.021             |
| Ami         | 7.82E-01                  | 0.938                      | 0.062      | 0.020             |
| She         | 5.77E-01                  | 0.939                      | 0.061      | 0.020             |

**Table S11.3: Modeling Eastern Eurasian populations as a mix of EHG and She.** We test whether (*Test*, EHG, She) is consistent with 2 streams of ancestry in relation to the M6 (M5+Onge) outgroups and list mixture proportions. P-values >0.05 are highlighted. The right column lists “EHG-equivalent” proportions by summing the EHG column with 0.061 times the She column, as She are inferred to have 6.1% EHG ancestry in Table S11.2. For the set of populations that fit the EHG+She and EHG+Onge models, “EHG” proportions from Table S11.2 and “EHG equivalent” proportions from Table S11.3 differ by  $\leq 1.3\%$ .

| <i>Test</i> | P-value for rank=1 | Mixture Proportions |        |            | EHG+0.061*She |
|-------------|--------------------|---------------------|--------|------------|---------------|
|             |                    | She                 | EHG    | Std. Error |               |
| Selkup      | 1.70E-01           | 0.583               | 0.417  | 0.012      | 0.453         |
| Tubalar     | 2.43E-07           | 0.592               | 0.408  | 0.012      | 0.444         |
| Even        | 7.61E-02           | 0.645               | 0.355  | 0.011      | 0.395         |
| Kyrgyz      | 1.64E-05           | 0.681               | 0.319  | 0.012      | 0.361         |
| Altaiian    | 1.02E-03           | 0.707               | 0.293  | 0.011      | 0.336         |
| Yukagir     | 3.24E-01           | 0.740               | 0.260  | 0.010      | 0.305         |
| Dolgan      | 1.20E-02           | 0.778               | 0.222  | 0.014      | 0.269         |
| Kalmyk      | 9.33E-05           | 0.787               | 0.213  | 0.010      | 0.261         |
| Tuvianian   | 5.77E-02           | 0.798               | 0.202  | 0.011      | 0.251         |
| Eskimo      | 2.04E-01           | 0.805               | 0.195  | 0.012      | 0.244         |
| Chukchi     | 7.26E-01           | 0.814               | 0.186  | 0.012      | 0.236         |
| Yakut       | 3.66E-01           | 0.824               | 0.176  | 0.010      | 0.226         |
| Itelmen     | 5.94E-01           | 0.835               | 0.165  | 0.014      | 0.216         |
| Koryak      | 5.59E-01           | 0.845               | 0.155  | 0.013      | 0.206         |
| Nganasan    | 1.11E-01           | 0.853               | 0.147  | 0.013      | 0.199         |
| Kusunda     | 8.11E-04           | 0.883               | 0.117  | 0.011      | 0.170         |
| Tu          | 1.71E-02           | 0.914               | 0.086  | 0.009      | 0.142         |
| Oroqen      | 3.49E-01           | 0.918               | 0.082  | 0.010      | 0.138         |
| Daur        | 3.35E-02           | 0.928               | 0.072  | 0.010      | 0.129         |
| Mongola     | 2.96E-01           | 0.928               | 0.072  | 0.010      | 0.129         |
| Xibo        | 3.12E-01           | 0.932               | 0.068  | 0.010      | 0.125         |
| Ulchi       | 3.40E-01           | 0.944               | 0.056  | 0.010      | 0.114         |
| Hezhen      | 3.89E-01           | 0.949               | 0.051  | 0.010      | 0.109         |
| Thai        | 1.64E-02           | 0.961               | 0.039  | 0.010      | 0.097         |
| Cambodian   | 1.13E-01           | 0.983               | 0.017  | 0.010      | 0.077         |
| Korean      | 5.06E-02           | 0.984               | 0.016  | 0.010      | 0.076         |
| Miao        | 6.06E-01           | 0.985               | 0.015  | 0.009      | 0.075         |
| Han         | 1.30E-01           | 0.985               | 0.015  | 0.007      | 0.075         |
| Naxi        | 1.27E-01           | 0.988               | 0.012  | 0.010      | 0.072         |
| Tujia       | 3.09E-01           | 0.989               | 0.011  | 0.009      | 0.071         |
| Yi          | 6.99E-01           | 0.989               | 0.011  | 0.009      | 0.071         |
| Japanese    | 3.86E-01           | 0.993               | 0.007  | 0.008      | 0.068         |
| Kinh        | 3.34E-01           | 0.996               | 0.004  | 0.009      | 0.065         |
| Lahu        | 4.61E-02           | 1.000               | 0.000  | 0.010      | 0.061         |
| Ami         | 7.59E-01           | 1.001               | -0.001 | 0.010      | 0.060         |
| Atayal      | 3.80E-01           | 1.004               | -0.004 | 0.012      | 0.057         |
| Dai         | 8.15E-02           | 1.006               | -0.006 | 0.009      | 0.056         |



**Table S11.4: Modeling Eastern Eurasian populations as a mixture of Onge and a ghost**

**population.** We list West Eurasian mixture proportions ( $\alpha$ ) estimated with the method of Supplementary Information, section 8 for mixtures of Onge + EHG (left column) and a population residing on the WHG→EHG, WHG→SHG, or SHG→EHG clines. Recall that the parameter  $\lambda$  for a cline  $A\rightarrow B$  is defined as “Ghost”= $A+\lambda(B-A)$ .

|           | EHG      |           | WHG→EHG  |           | WHG→SHG  |           | SHG→EHG  |  |
|-----------|----------|-----------|----------|-----------|----------|-----------|----------|--|
|           | $\alpha$ | $\lambda$ | $\alpha$ | $\lambda$ | $\alpha$ | $\lambda$ | $\alpha$ |  |
| Ami       | 0.061    | 1.116     | 0.067    | 2.230     | 0.076    | 1.158     | 0.065    |  |
| Atayal    | 0.065    | 1.224     | 0.078    | 2.381     | 0.086    | 1.420     | 0.076    |  |
| Cambodian | 0.083    | 1.354     | 0.114    | 2.634     | 0.129    | 1.672     | 0.108    |  |
| Chukchi   | 0.229    | 1.186     | 0.268    | 2.283     | 0.289    | 1.358     | 0.262    |  |
| Dai       | 0.067    | 1.245     | 0.083    | 2.429     | 0.092    | 1.455     | 0.080    |  |
| Daur      | 0.124    | 1.152     | 0.140    | 2.225     | 0.151    | 1.289     | 0.138    |  |
| Eskimo    | 0.230    | 1.260     | 0.288    | 2.385     | 0.305    | 1.535     | 0.282    |  |
| Even      | 0.388    | 1.020     | 0.394    | 1.998     | 0.422    | 1.007     | 0.389    |  |
| Han       | 0.077    | 1.226     | 0.094    | 2.401     | 0.105    | 1.411     | 0.090    |  |
| Hezhen    | 0.104    | 1.300     | 0.136    | 2.498     | 0.148    | 1.594     | 0.131    |  |
| Itelmen   | 0.212    | 1.212     | 0.254    | 2.321     | 0.273    | 1.419     | 0.248    |  |
| Japanese  | 0.071    | 1.325     | 0.094    | 2.552     | 0.105    | 1.637     | 0.091    |  |
| Kinh      | 0.068    | 1.354     | 0.094    | 2.573     | 0.102    | 1.724     | 0.091    |  |
| Korean    | 0.081    | 1.488     | 0.131    | 2.818     | 0.145    | 2.002     | 0.124    |  |
| Koryak    | 0.202    | 1.111     | 0.220    | 2.190     | 0.242    | 1.171     | 0.214    |  |
| Lahu      | 0.067    | 0.575     | 0.051    | 1.490     | 0.060    | -0.103    | 0.049    |  |
| Miao      | 0.077    | 1.202     | 0.091    | 2.340     | 0.101    | 1.370     | 0.088    |  |
| Mongola   | 0.122    | 1.302     | 0.159    | 2.520     | 0.177    | 1.584     | 0.153    |  |
| Naxi      | 0.075    | 1.179     | 0.087    | 2.310     | 0.096    | 1.318     | 0.084    |  |
| Nganasan  | 0.198    | 1.291     | 0.255    | 2.456     | 0.274    | 1.587     | 0.248    |  |
| Oroqen    | 0.140    | 1.252     | 0.173    | 2.375     | 0.185    | 1.523     | 0.170    |  |
| Selkup    | 0.441    | 1.120     | 0.486    | 2.136     | 0.514    | 1.241     | 0.481    |  |
| She       | 0.058    | 1.353     | 0.080    | 2.618     | 0.090    | 1.685     | 0.076    |  |
| Thai      | 0.098    | 1.327     | 0.132    | 2.549     | 0.145    | 1.649     | 0.127    |  |
| Tu        | 0.134    | 1.249     | 0.166    | 2.419     | 0.182    | 1.477     | 0.160    |  |
| Tujia     | 0.075    | 1.232     | 0.092    | 2.409     | 0.102    | 1.427     | 0.088    |  |
| Tuvinian  | 0.240    | 1.154     | 0.272    | 2.223     | 0.294    | 1.292     | 0.267    |  |
| Ulchi     | 0.111    | 1.240     | 0.136    | 2.392     | 0.149    | 1.464     | 0.132    |  |
| Xibo      | 0.121    | 1.332     | 0.163    | 2.557     | 0.179    | 1.660     | 0.156    |  |
| Yakut     | 0.222    | 1.202     | 0.263    | 2.308     | 0.282    | 1.402     | 0.257    |  |
| Yi        | 0.072    | 1.334     | 0.097    | 2.560     | 0.107    | 1.664     | 0.093    |  |
| Yukagir   | 0.298    | 1.098     | 0.322    | 2.103     | 0.341    | 1.187     | 0.319    |  |

**Table S11.5: Modeling EHG as a mixture of WHG and a ghost population on the Onge→Eastern Eurasian cline.** Projection beyond the (Onge, *Eastern Eurasian*) segment varies from  $\lambda \sim 2$  to 12 depending on which *Eastern Eurasian* population is used, being higher for populations with less West Eurasian ancestry. However, the proportion from the “Ghost” population is fairly stable (average: 0.755, standard deviation: 0.076, range: 0.571-0.936).

| <b>Eastern Eurasian</b> | <b><math>\lambda</math></b> | <b><math>\alpha_{\text{GHOST}}</math></b> |
|-------------------------|-----------------------------|-------------------------------------------|
| Ami                     | 9.390                       | 0.661                                     |
| Atayal                  | 12.148                      | 0.767                                     |
| Cambodian               | 7.014                       | 0.663                                     |
| Chukchi                 | 3.519                       | 0.802                                     |
| Dai                     | 10.286                      | 0.718                                     |
| Daur                    | 6.605                       | 0.813                                     |
| Eskimo                  | 3.430                       | 0.782                                     |
| Even                    | 2.437                       | 0.936                                     |
| Han                     | 9.272                       | 0.740                                     |
| Hezhen                  | 7.037                       | 0.741                                     |
| Itelmen                 | 3.526                       | 0.762                                     |
| Japanese                | 9.732                       | 0.713                                     |
| Kinh                    | 10.701                      | 0.728                                     |
| Korean                  | 7.385                       | 0.658                                     |
| Koryak                  | 3.825                       | 0.782                                     |
| Lahu                    | 4.943                       | 0.571                                     |
| Miao                    | 9.932                       | 0.765                                     |
| Mongola                 | 5.564                       | 0.715                                     |
| Naxi                    | 10.045                      | 0.766                                     |
| Nganasan                | 3.871                       | 0.763                                     |
| Oroqen                  | 5.874                       | 0.800                                     |
| Selkup                  | 2.051                       | 0.888                                     |
| She                     | 9.067                       | 0.638                                     |
| Thai                    | 6.958                       | 0.713                                     |
| Tu                      | 5.546                       | 0.749                                     |
| Tujia                   | 9.880                       | 0.754                                     |
| Tuvinian                | 3.549                       | 0.838                                     |
| Ulchi                   | 7.030                       | 0.771                                     |
| Xibo                    | 5.770                       | 0.722                                     |
| Yakut                   | 3.787                       | 0.823                                     |
| Yi                      | 9.836                       | 0.725                                     |
| Yukagir                 | 3.087                       | 0.902                                     |

### The “Ghost” population may correspond to Ancient North Eurasians

We were curious to see if the population represented by the MA1 Upper Paleolithic Siberian<sup>2</sup> could be the “Ghost” population, as it shares more alleles with EHG than with other European hunter-gatherers<sup>3</sup> and there is a cline of shared genetic drift with it in East Asia<sup>2</sup>. Testing Left=(EHG, WHG, MA1), we weakly reject rank=1 (P=0.041). Fig. S11.2 shows a modeling of EHG as a mix of 71% MA1 and 29% WHG, although the regression is driven wholly by statistics involving the Switzerland\_HG outgroup. The mixture proportions resemble the ~3/4 “Ghost” and ~1/4 “WHG” inferred for EHG (Table S11.5) and we think it is plausible that an “Ancient North Eurasian”-related population (which, however may not be exactly represented by MA1) was the “Ghost” population.

**Figure S11.2: Modeling EHG as a WHG+MA1 mixture.** There is a cluster of points about the origin (top-left) and the signal of negative slope is driven by the cluster of four points at the bottom-right that involve statistics of the form  $f_4(\text{EHG}, \text{MA1}; O_2, \text{Switzerland\_HG})$  (that are negative), and  $f_4(\text{WHG}, \text{EHG}; O_2, \text{Switzerland\_HG})$  (that are positive), suggesting that EHG are intermediate between WHG and Switzerland\_HG. A previous analysis (Supplementary Information, section 9 of ref.3) prior to the availability of the Switzerland\_HG individual did not discover this signal, highlighting the usefulness of including this sample to the set of outgroups as a way to differentiate between European hunter-gatherers like WHG and “Ancient North Eurasians” like MA1.

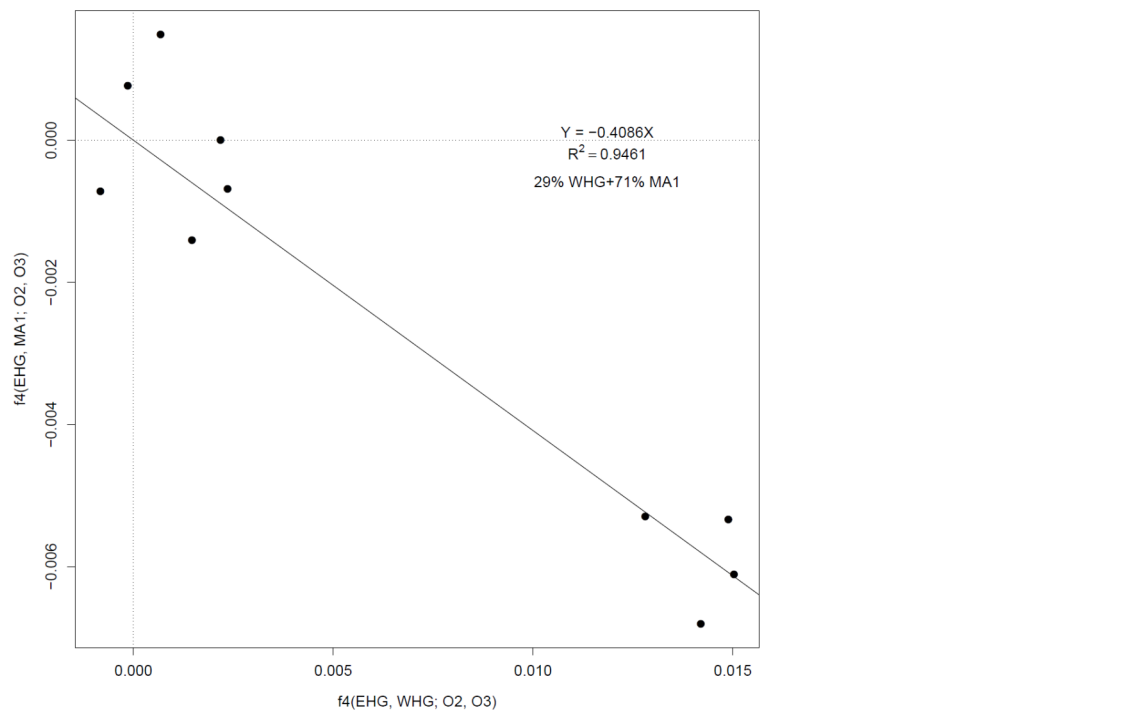

Another candidate for the source population might be the AG2<sup>2</sup> sample which is similar to MA1 but is more recent (it postdates the Last Glacial Maximum); we interpret this very cautiously as it is of poorer quality has a higher level of contamination, estimated to be ~30% using polymorphism on the X-chromosome for this male individual<sup>2</sup>. Nonetheless, we cannot reject a mixture model (P-value for rank=1 is 0.66) with EHG having 26.6±4.1% WHG and 73.4±4.1% AG2 ancestry. We obtain similar proportions when modeling EHG as a mix of WHG and a “Ghost” population defined wholly by the cline of Eastern Eurasians and when modeling it as a mix of WHG and MA1/AG2, suggesting that these two “Ancient North Eurasian” individuals from Siberia may be genetically close to the sought-after “Ghost”.

We repeat the qpAdm admixture analysis of Eastern Eurasians using MA1 and AG2 (rather than EHG) as sources (Table S11.6). AG2 appears to be a valid source for populations across the Eastern Eurasian cline, but MA1 is not, especially for populations with the lowest levels of Onge ancestry. We list mixture proportions using either EHG or AG2 in Extended Data Fig. 4. We also fit a simple model that encapsulates admixture from an AG2-related population into both European hunter-gatherers and Eastern Eurasians (Fig. S11.3), and list mixture proportions for different Eastern Eurasian populations (Table S11.6); most of these are within 3 standard errors of those derived using qpAdm.

**Figure S11.3: A simple mixture model deriving ancestry into European hunter-gatherers and East Asians from a common AG2-related “Ancient North Eurasian” source.** Fit for Han is shown; mixture proportions for other populations in Table S11.6

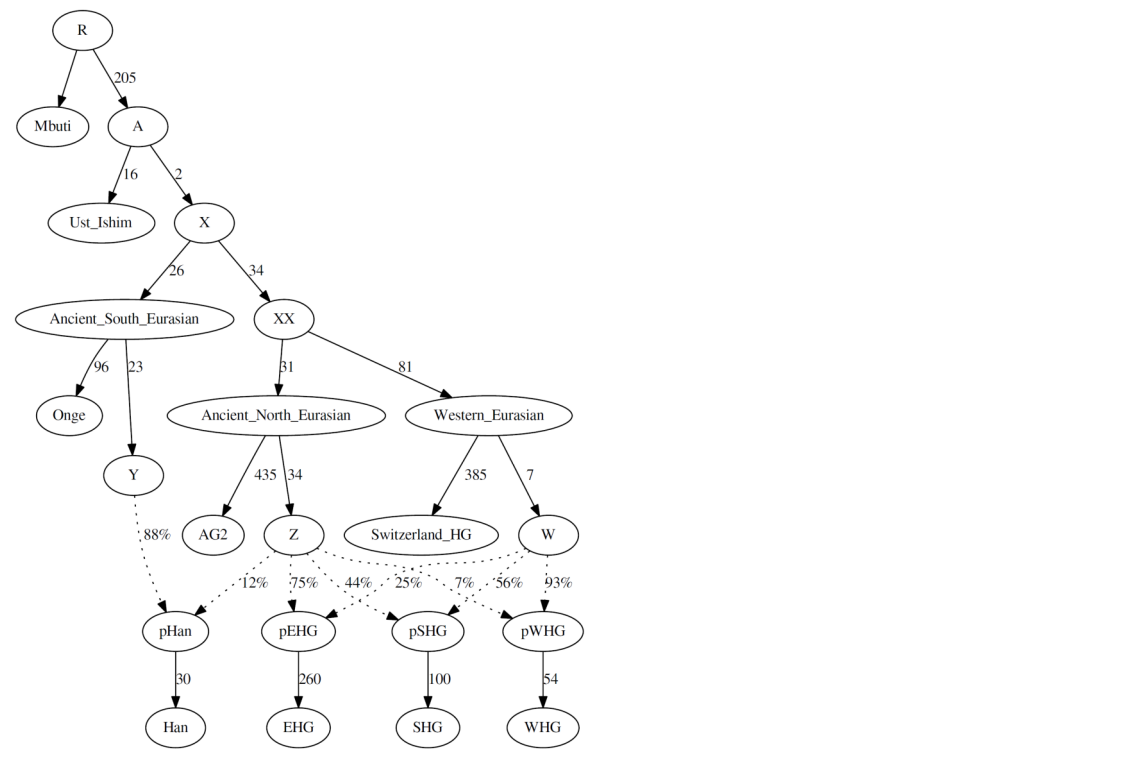

**Table S11.6: Modeling Eastern Eurasian populations as a mix of MA1 or AG2 and Onge.** We test whether (*Test*, MA1 or AG2, Onge) is consistent with 2 streams of ancestry in relation to the M5 outgroups and list mixture proportions. P-values for rank=1 that are >0.05 are highlighted. Mixture proportions from AG2 according to the model of Fig. S11.3 are shown in the penultimate column and the number of standard errors it differs from the qpAdm model in the last column.

| <i>Test</i> | qpAdm    |       |       |           | qpGraph  |       |       |           | qpAdm |               |
|-------------|----------|-------|-------|-----------|----------|-------|-------|-----------|-------|---------------|
|             | P-value  | Onge  | MA1   | Std. Err. | P-value  | Onge  | AG2   | Std. Err. | AG2   | -qpGraph<br>Z |
| Altaian     | 1.17E-04 | 0.558 | 0.442 | 0.027     | 3.59E-01 | 0.565 | 0.435 | 0.032     | 0.344 | 2.9           |
| Ami         | 7.91E-01 | 0.913 | 0.087 | 0.028     | 8.67E-01 | 0.915 | 0.085 | 0.027     | 0.112 | -1            |
| Atayal      | 7.59E-01 | 0.911 | 0.089 | 0.029     | 9.56E-01 | 0.908 | 0.092 | 0.029     | 0.143 | -1.8          |
| Cambodian   | 3.17E-01 | 0.88  | 0.12  | 0.025     | 5.93E-01 | 0.873 | 0.127 | 0.027     | 0.117 | 0.4           |
| Chukchi     | 1.04E-01 | 0.678 | 0.322 | 0.026     | 4.53E-01 | 0.698 | 0.302 | 0.027     | 0.357 | -2            |
| Dai         | 7.85E-01 | 0.905 | 0.095 | 0.027     | 9.27E-01 | 0.903 | 0.097 | 0.027     | 0.13  | -1.2          |
| Daur        | 7.42E-02 | 0.835 | 0.165 | 0.026     | 5.32E-01 | 0.83  | 0.17  | 0.027     | 0.173 | -0.1          |
| Dolgan      | 3.37E-03 | 0.653 | 0.347 | 0.03      | 2.94E-01 | 0.653 | 0.347 | 0.034     | 0.256 | 2.7           |
| Eskimo      | 2.97E-01 | 0.679 | 0.321 | 0.027     | 9.49E-01 | 0.695 | 0.305 | 0.028     | 0.365 | -2.1          |
| Even        | 3.16E-09 | 0.465 | 0.535 | 0.031     | 2.75E-02 | 0.491 | 0.509 | 0.034     | 0.419 | 2.6           |
| Han         | 4.69E-01 | 0.892 | 0.108 | 0.026     | 7.50E-01 | 0.891 | 0.109 | 0.026     | 0.12  | -0.4          |
| Hezhen      | 4.15E-01 | 0.855 | 0.145 | 0.027     | 7.86E-01 | 0.855 | 0.145 | 0.027     | 0.166 | -0.8          |
| Itelmen     | 2.56E-01 | 0.697 | 0.303 | 0.028     | 5.33E-01 | 0.724 | 0.276 | 0.029     | 0.332 | -1.9          |
| Japanese    | 7.43E-01 | 0.896 | 0.104 | 0.026     | 9.25E-01 | 0.899 | 0.101 | 0.025     | 0.131 | -1.2          |
| Kalmyk      | 1.64E-04 | 0.661 | 0.339 | 0.026     | 2.90E-01 | 0.656 | 0.344 | 0.029     | 0.266 | 2.7           |
| Kinh        | 8.08E-01 | 0.904 | 0.096 | 0.027     | 9.56E-01 | 0.903 | 0.097 | 0.027     | 0.114 | -0.6          |
| Korean      | 4.81E-01 | 0.878 | 0.122 | 0.027     | 7.49E-01 | 0.878 | 0.122 | 0.028     | 0.114 | 0.3           |
| Koryak      | 2.31E-02 | 0.717 | 0.283 | 0.027     | 2.23E-01 | 0.739 | 0.261 | 0.026     | 0.337 | -2.9          |
| Kusunda     | 1.17E-03 | 0.78  | 0.22  | 0.025     | 1.26E-01 | 0.775 | 0.225 | 0.026     | 0.13  | 3.7           |
| Kyrgyz      | 1.83E-05 | 0.53  | 0.47  | 0.027     | 6.57E-01 | 0.531 | 0.469 | 0.033     | 0.351 | 3.6           |
| Lahu        | 2.38E-01 | 0.91  | 0.09  | 0.027     | 4.59E-01 | 0.906 | 0.094 | 0.026     | 0.082 | 0.5           |
| Miao        | 6.88E-01 | 0.892 | 0.108 | 0.028     | 9.40E-01 | 0.89  | 0.11  | 0.028     | 0.128 | -0.6          |
| Mongola     | 2.22E-01 | 0.826 | 0.174 | 0.027     | 6.67E-01 | 0.825 | 0.175 | 0.028     | 0.151 | 0.9           |
| Naxi        | 4.06E-01 | 0.899 | 0.101 | 0.026     | 7.25E-01 | 0.896 | 0.104 | 0.026     | 0.108 | -0.2          |
| Nganasan    | 6.08E-02 | 0.725 | 0.275 | 0.027     | 6.78E-01 | 0.719 | 0.281 | 0.031     | 0.275 | 0.2           |
| Oroqen      | 4.93E-01 | 0.807 | 0.193 | 0.026     | 9.19E-01 | 0.811 | 0.189 | 0.026     | 0.191 | -0.1          |
| Selkup      | 5.85E-07 | 0.401 | 0.599 | 0.031     | 1.39E-01 | 0.415 | 0.585 | 0.038     | 0.476 | 2.9           |
| She         | 8.08E-01 | 0.912 | 0.088 | 0.027     | 8.14E-01 | 0.912 | 0.088 | 0.028     | 0.1   | -0.4          |
| Thai        | 1.29E-01 | 0.865 | 0.135 | 0.025     | 5.37E-01 | 0.856 | 0.144 | 0.027     | 0.134 | 0.4           |
| Tu          | 6.80E-02 | 0.817 | 0.183 | 0.026     | 4.66E-01 | 0.813 | 0.187 | 0.027     | 0.124 | 2.3           |
| Tubalar     | 5.80E-07 | 0.423 | 0.577 | 0.031     | 2.69E-01 | 0.441 | 0.559 | 0.035     | 0.444 | 3.3           |
| Tujia       | 5.76E-01 | 0.894 | 0.106 | 0.027     | 8.67E-01 | 0.895 | 0.105 | 0.026     | 0.107 | -0.1          |
| Tuvinian    | 1.25E-03 | 0.673 | 0.327 | 0.025     | 3.34E-01 | 0.676 | 0.324 | 0.028     | 0.278 | 1.6           |
| Ulchi       | 3.08E-01 | 0.844 | 0.156 | 0.026     | 7.15E-01 | 0.848 | 0.152 | 0.026     | 0.185 | -1.2          |
| Xibo        | 3.46E-01 | 0.826 | 0.174 | 0.026     | 8.12E-01 | 0.821 | 0.179 | 0.028     | 0.137 | 1.5           |
| Yakut       | 2.44E-02 | 0.696 | 0.304 | 0.025     | 7.06E-01 | 0.706 | 0.294 | 0.027     | 0.266 | 1.1           |
| Yi          | 7.72E-01 | 0.896 | 0.104 | 0.027     | 9.22E-01 | 0.899 | 0.101 | 0.026     | 0.114 | -0.5          |
| Yukagir     | 3.31E-05 | 0.598 | 0.402 | 0.026     | 1.03E-01 | 0.616 | 0.384 | 0.029     | 0.33  | 1.9           |

The fact that MA1, AG2, and EHG could be related to a population contributing to both European hunter-gatherers and Eastern Eurasians is shown by plotting outgroup  $f_3$ -statistics of the form  $f_3(\text{Mbuti}; \text{Papuan}, \text{Test})$  and  $f_3(\text{Mbuti}; \text{Switzerland\_HG}, \text{Test})$  (Extended Data Fig. 7). European hunter-gatherer populations are arrayed on a cline WHG→SHG→EHG and Eastern Eurasian populations form their own cline with Onge just beyond its southern end. Both MA1 and AG2 appear to be placed on the opposite end of the Eastern Eurasian cline. EHG, AG2, and MA1 surround the intersection point of the two clines, consistent with them being plausible sources for many East Asian populations (Tables S11.2, 6)

Future studies of ancient DNA from eastern Europe (where there is currently a ~30,000-year gap between Kostenki14<sup>5</sup> and the EHG<sup>3,10</sup>) and Siberia may identify the sources of this admixture. The fact that the WHG who have been sampled from throughout mainland Europe<sup>1,11,12</sup> as well as the SHG<sup>1,3</sup> possess EHG admixture (Supplementary Information, section 7) suggests that the “Ghost” population admixed into European hunter-gatherers some time before the ~8,000-year old time frame of the available EHG/SHG/WHG samples.

The timing of the inferred admixture in East Asians is unknown, although the fact that Native Americans also have ancestry<sup>6</sup> from “Ancient North Eurasians” (ANE), related to MA1 and AG2, suggests that mixtures between ANE and an eastern non-African populations distantly related to the Onge may predate the settlement of the Americas. We model Native American populations as a mix of Onge and MA1, AG2, or EHG (Table S11.7). Both MA1 and AG2 are valid sources for Native American populations. We estimate that Amazonian populations like the Karitiana and Surui have ~40% of their ancestry from ANE, consistent with previous estimates<sup>1,2,9</sup>.

We also include two ancient genomes in Table S11.7, ‘Clovis’: the ~13,000-year old Anzick-1 from the Clovis culture in Montana<sup>13</sup>, and ‘Kennewick’: the ~8,500-year old Kennewick Man from Washington State<sup>14</sup>, whose mixture proportions are similar to present-day Native Americans, showing that the mixture between ‘Ancient North Eurasians’ and an Onge-like population must have happened at least by ~13,000 years ago. It is important to sample Siberia and East Asia more extensively in order to better understand the history of these two sources of the ancestry of East Eurasians and Native Americans. Mixture proportions for Native Americans (Table S11.7) are at the ‘northern’ end of those for east Eurasian populations (Tables S11.2, S11.6), consistent with a Siberian origin of Native Americans. However, the ancient geography of the ANE/Onge-related populations is likely to be complex, as present-day Amazonians not only have the ‘general’ eastern non-African admixture related to the Onge, but also a more specific stream of ancestry related to them and to Australasian populations<sup>9</sup>.

**Table S11.7: Modeling Native American populations.** We model a *Native American* population as a mix of Onge and a population  $X$ , showing the P-value for rank=1 for Left=(*Native American*, Onge,  $X$ )

| <b>X</b> | <b>Native American</b> | <b>P-value for rank=1</b> | <b>Mixture Proportions</b> |          |                   |
|----------|------------------------|---------------------------|----------------------------|----------|-------------------|
|          |                        |                           | <b>Onge</b>                | <b>X</b> | <b>Std. Error</b> |
| EHG      | Karitiana              | 6.49E-03                  | 0.721                      | 0.279    | 0.023             |
| MA1      | Karitiana              | 7.04E-01                  | 0.605                      | 0.395    | 0.031             |
| AG2      | Karitiana              | 1.66E-01                  | 0.613                      | 0.387    | 0.037             |
| EHG      | Surui                  | 1.24E-01                  | 0.721                      | 0.279    | 0.023             |
| MA1      | Surui                  | 4.00E-01                  | 0.610                      | 0.390    | 0.033             |
| AG2      | Surui                  | 9.63E-02                  | 0.631                      | 0.369    | 0.037             |
| EHG      | Mixe                   | 1.92E-02                  | 0.693                      | 0.307    | 0.022             |
| MA1      | Mixe                   | 2.89E-01                  | 0.567                      | 0.433    | 0.031             |
| AG2      | Mixe                   | 7.85E-01                  | 0.587                      | 0.413    | 0.034             |
| EHG      | Pima                   | 1.84E-02                  | 0.702                      | 0.298    | 0.022             |
| MA1      | Pima                   | 1.17E-01                  | 0.584                      | 0.416    | 0.031             |
| AG2      | Pima                   | 7.86E-01                  | 0.599                      | 0.401    | 0.035             |
| EHG      | Clovis                 | 2.60E-04                  | 0.711                      | 0.289    | 0.029             |
| MA1      | Clovis                 | 2.85E-01                  | 0.580                      | 0.420    | 0.038             |
| AG2      | Clovis                 | 1.24E-01                  | 0.580                      | 0.420    | 0.049             |
| EHG      | Kennewick              | 7.53E-03                  | 0.703                      | 0.297    | 0.030             |
| MA1      | Kennewick              | 3.49E-01                  | 0.553                      | 0.447    | 0.046             |
| AG2      | Kennewick              | 8.41E-01                  | 0.581                      | 0.419    | 0.060             |

## References

1. Lazaridis, I. *et al.* Ancient human genomes suggest three ancestral populations for present-day Europeans. *Nature* **513**, 409-413, (2014).
2. Raghavan, M. *et al.* Upper Palaeolithic Siberian genome reveals dual ancestry of Native Americans. *Nature* **505**, 87-91, (2014).
3. Haak, W. *et al.* Massive migration from the steppe was a source for Indo-European languages in Europe. *Nature* **522**, 207-211, (2015).
4. Jones, E. R. *et al.* Upper Palaeolithic genomes reveal deep roots of modern Eurasians. *Nat. Commun.* **6**, 8912, (2015).
5. Seguin-Orlando, A. *et al.* Genomic structure in Europeans dating back at least 36,200 years. *Science* **346**, 1113-1118, (2014).
6. Raghavan, M. *et al.* The genetic prehistory of the New World Arctic. *Science* **345**, (2014).
7. Reich, D., Thangaraj, K., Patterson, N., Price, A. L. & Singh, L. Reconstructing Indian population history. *Nature* **461**, 489-494, (2009).
8. Moorjani, P. *et al.* Genetic evidence for recent population mixture in India. *Am. J. Hum. Genet.* **93**, 422-438, (2013).
9. Skoglund, P. *et al.* Genetic evidence for two founding populations of the Americas. *Nature* **525**, 104-108, (2015).
10. Mathieson, I. *et al.* Genome-wide patterns of selection in 230 ancient Eurasians. *Nature* **528**, 499-503, (2015).
11. Gamba, C. *et al.* Genome flux and stasis in a five millennium transect of European prehistory. *Nat. Commun.* **5**, 5257 (2014).
12. Olalde, I. *et al.* Derived immune and ancestral pigmentation alleles in a 7,000-year-old Mesolithic European. *Nature* **507**, 225-228, (2014).
13. Rasmussen, M. *et al.* The genome of a Late Pleistocene human from a Clovis burial site in western Montana. *Nature* **506**, 225-229, (2014).
14. Rasmussen, M. *et al.* The ancestry and affiliations of Kennewick Man. *Nature* **523**, 455-458, (2015).
